# Supplementary material
Source: publisher figshare collection journal article supplement (https://gsajournals.figshare.com/ndownloader/files/26492624)
Supplement: Supplementary file 1 [file 26492624]

## Sheet: Table S1
Table S1. List of samples genotyped by the version 2 of the Arachis SNP array
Genotype	Short form	ploidy level	Sample number	Array barcode	Color code	explaination
A. ipaensis KG30076 _Plant 1	Ipa_1	2x	1	a550846-4362739-080719-778_A01		Sister plant of the ones used to create the amphidiploid
				a550846-4353861-030919-380_A17
				a550846-4353861-030919-380_A19
A. ipaensis KG30076 _Plant 2	Ipa_2	2x	1	a550846-4353861-030919-380_A21		Sister plant of the ones used to create the amphidiploid
				a550846-4353861-030919-380_A23		The actual male parent of the new diploid hybrids
				a550846-4383018-062120-227_M22
				a550846-4383018-062120-227_M24
A. correntina 9530_Plant 1	Cor_1	2x	1	a550846-4353861-030919-380_A01		Sister plant of the ones used to create the amphidiploid
				a550846-4353861-030919-380_A03
				a550846-4341834-102118-808_L13
A. correntina 9530_Plant 2	Cor_2	2x	1	a550846-4353861-030919-380_A01		Sister lines of the plant used to create the amphidiploid
				a550846-4353861-030919-380_A03
				a550846-4341834-102118-808_L13
				a550846-4383018-062120-227_O06
				a550846-4383018-062120-227_O08
[A. ipaensis KG30076 x A. correntina 9530]2x	IpaCor2x	2x	1	a550846-4341834-102118-808_L08		Diploid hybrid used to create the amphidiploid;
				a550846-4353861-030919-380_C19		before colchicine treatment
[A. ipaensis KG30076 x A. correntina 9530]2x_col	IpaCor2x _col	2x	1	a550846-4341834-102118-808_L06		Diploid hybrid used to create the amphidiploid;
				a550846-4353861-030919-380_C17		after colchicine treatment
[A. ipaensis KG30076 x A. correntina 9530]4x_S0	IpaCor4x _S0	4x	6	a550846-4353861-030919-380_E05		Three of the S0 DNA were submitted once and the rest three
				a550846-4341834-102118-808_L02		were submitted twice
				a550846-4353861-030919-380_E07
				a550846-4341834-102118-808_J24
				a550846-4353861-030919-380_E09
				a550846-4341834-102118-808_J22
				a550846-4353861-030919-380_E11
				a550846-4353861-030919-380_E13
				a550846-4353861-030919-380_E15
[A. ipaensis KG30076 x A. correntina 9530]4x_S1	IpaCor4x _S1	4x	7	a550846-4350385-102318-331_K01		All of the S1 were progenies of one of plant S0:2
				a550846-4350385-102318-331_K03
				a550846-4350385-102318-331_K05
				a550846-4350385-102318-331_K07
				a550846-4350385-102318-331_K09
				a550846-4350385-102318-331_K11
				a550846-4350385-102318-331_K13
13-1014	13-1014	4x	1	a550846-4341834-102118-813_D08		13-1014=C1805-617-2 x Georgia 06G
13-2113	13-2113	4x	1	a550846-4341834-102118-813_D10		13-2113=C1805-2-9-16 x C724-19-25
13-1014x[A. ipaensis KG30076 x A. correntina 9530]4x_S0_F1	(13-1014 x IpaCor4x_S0)_F1	4x	21	a550846-4350385-102318-331_K21		F1 hybrids between A. hypogaea cultivated breeding line and IpaCor4x_S0
				a550846-4350385-102318-331_K23
				a550846-4350385-102318-331_M01
				a550846-4350385-102318-331_M03
				a550846-4350385-102318-331_M05
				a550846-4350385-102318-331_M19
				a550846-4350385-102318-331_M21
				a550846-4350385-102318-331_M23
				a550846-4350385-102318-331_O01
				a550846-4350385-102318-331_O03
				a550846-4350385-102318-331_O05
				a550846-4350385-102318-331_O07
				a550846-4350385-102318-331_O09
				a550846-4350385-102318-331_O11
				a550846-4341834-102118-813_B04
				a550846-4341834-102118-813_B06
				a550846-4341834-102118-813_B08
				a550846-4341834-102118-813_B10
				a550846-4341834-102118-813_B12
				a550846-4341834-102118-813_B14
				a550846-4341834-102118-813_B16
13-2113x[A. ipaensis KG30076 x A. correntina 9530]4x_S0_F1	(13-2113 x IpaCor4x _S0)_F1	4x	16	a550846-4350385-102318-331_M07		F1 hybrids between A. hypogaea cultivated breeding line and IpaCor4x_S0
				a550846-4350385-102318-331_M09
				a550846-4350385-102318-331_M11
				a550846-4350385-102318-331_M13
				a550846-4350385-102318-331_M15
				a550846-4350385-102318-331_M17
				a550846-4350385-102318-331_O13
				a550846-4350385-102318-331_O15
				a550846-4350385-102318-331_O17
				a550846-4350385-102318-331_O19
				a550846-4350385-102318-331_O21
				a550846-4350385-102318-331_O23
				a550846-4341834-102118-813_B02
				a550846-4341834-102118-813_B18
				a550846-4341834-102118-813_B20
				a550846-4341834-102118-813_B22
(13-1014x[A. ipaensis KG30076 x A. correntina 9530]4x_S0:2)_F1:4_F2	(13-1014 x IpaCor4x_S0:2)_F1:4_F2	4x	456	a550846-4395515-050821-561_B02		F2 progenies from F1 hybrids between A. hypogaea cultivated breeding line and IpaCor4x_S0
				a550846-4395515-050821-561_B21
				a550846-4395515-050821-561_D15
				a550846-4395515-050821-561_D04
				a550846-4395515-050821-561_D06
				a550846-4395515-050821-561_D08
				a550846-4395515-050821-561_D10
				a550846-4395515-050821-561_D12
				a550846-4395515-050821-561_D14
				a550846-4395515-050821-561_D16
				a550846-4395515-050821-561_D18
				a550846-4395515-050821-561_D20
				a550846-4395515-050821-561_D22
				a550846-4395515-050821-561_D17
				a550846-4395515-050821-561_D24
				a550846-4395515-050821-561_F02
				a550846-4395515-050821-561_F04
				a550846-4395515-050821-561_F06
				a550846-4395515-050821-561_F08
				a550846-4395515-050821-561_F10
				a550846-4395515-050821-561_F12
				a550846-4395515-050821-561_F14
				a550846-4395515-050821-561_F16
				a550846-4395515-050821-561_F18
				a550846-4395515-050821-561_D19
				a550846-4395515-050821-561_F20
				a550846-4395515-050821-561_F22
				a550846-4395515-050821-561_F24
				a550846-4395515-050821-561_H02
				a550846-4395515-050821-561_H04
				a550846-4395515-050821-561_H06
				a550846-4395515-050821-561_H08
				a550846-4395515-050821-561_H10
				a550846-4395515-050821-561_H12
				a550846-4395515-050821-561_H14
				a550846-4395515-050821-561_D21
				a550846-4395515-050821-561_H16
				a550846-4395515-050821-561_H18
				a550846-4395515-050821-561_H20
				a550846-4395515-050821-561_H22
				a550846-4395515-050821-561_H24
				a550846-4395515-050821-561_J02
				a550846-4395515-050821-561_J04
				a550846-4395515-050821-561_J06
				a550846-4395515-050821-561_J08
				a550846-4395515-050821-561_J10
				a550846-4395515-050821-561_D23
				a550846-4395515-050821-561_J12
				a550846-4395515-050821-561_J14
				a550846-4395515-050821-561_J16
				a550846-4395515-050821-561_J18
				a550846-4395515-050821-561_J20
				a550846-4395515-050821-561_J22
				a550846-4395515-050821-561_J24
				a550846-4395515-050821-561_L02
				a550846-4395515-050821-561_L04
				a550846-4395515-050821-561_L06
				a550846-4395515-050821-561_F01
				a550846-4395515-050821-561_L08
				a550846-4395515-050821-561_L10
				a550846-4395515-050821-561_L12
				a550846-4395515-050821-561_L14
				a550846-4395515-050821-561_L16
				a550846-4395515-050821-561_L18
				a550846-4395515-050821-561_L20
				a550846-4395515-050821-561_L22
				a550846-4395515-050821-561_L24
				a550846-4395515-050821-561_N02
				a550846-4395515-050821-561_F03
				a550846-4395515-050821-561_N04
				a550846-4395515-050821-561_N06
				a550846-4395515-050821-561_N08
				a550846-4395515-050821-561_N10
				a550846-4395515-050821-561_N12
				a550846-4395515-050821-561_N14
				a550846-4395515-050821-561_N16
				a550846-4395515-050821-561_N18
				a550846-4395515-050821-561_N20
				a550846-4395515-050821-561_N22
				a550846-4395515-050821-561_F05
				a550846-4395515-050821-561_N24
				a550846-4395515-050821-561_P02
				a550846-4395515-050821-561_P04
				a550846-4395515-050821-561_P06
				a550846-4395515-050821-561_P08
				a550846-4395515-050821-561_P10
				a550846-4395515-050821-561_P12
				a550846-4395515-050821-561_P14
				a550846-4395515-050821-561_P16
				a550846-4395515-050821-561_P18
				a550846-4395515-050821-561_F07
				a550846-4395515-050821-561_P20
				a550846-4395515-050821-561_P22
				a550846-4395515-050821-561_P24
				a550846-4400671-090121-777_A01
				a550846-4400671-090121-777_A03
				a550846-4400671-090121-777_A05
				a550846-4400671-090121-777_A07
				a550846-4400671-090121-777_A09
				a550846-4400671-090121-777_A11
				a550846-4400671-090121-777_A13
				a550846-4395515-050821-561_F09
				a550846-4400671-090121-777_A15
				a550846-4400671-090121-777_A17
				a550846-4400671-090121-777_A19
				a550846-4400671-090121-777_A21
				a550846-4400671-090121-777_A23
				a550846-4400671-090121-777_C01
				a550846-4400671-090121-777_C03
				a550846-4400671-090121-777_C05
				a550846-4400671-090121-777_C07
				a550846-4400671-090121-777_C09
				a550846-4395515-050821-561_B23
				a550846-4395515-050821-561_F11
				a550846-4400671-090121-777_C11
				a550846-4400671-090121-777_C13
				a550846-4400671-090121-777_C15
				a550846-4400671-090121-777_C17
				a550846-4400671-090121-777_C19
				a550846-4400671-090121-777_C21
				a550846-4400671-090121-777_C23
				a550846-4400671-090121-777_E01
				a550846-4400671-090121-777_E03
				a550846-4400671-090121-777_E05
				a550846-4395515-050821-561_F13
				a550846-4400671-090121-777_E07
				a550846-4400671-090121-777_E09
				a550846-4400671-090121-777_E11
				a550846-4400671-090121-777_E13
				a550846-4400671-090121-777_E15
				a550846-4400671-090121-777_E17
				a550846-4400671-090121-777_E19
				a550846-4400671-090121-777_E21
				a550846-4400671-090121-777_E23
				a550846-4400671-090121-777_G01
				a550846-4395515-050821-561_F15
				a550846-4400671-090121-777_G03
				a550846-4400671-090121-777_G05
				a550846-4400671-090121-777_G07
				a550846-4400671-090121-777_G09
				a550846-4400671-090121-777_G11
				a550846-4400671-090121-777_G13
				a550846-4400671-090121-777_G15
				a550846-4400671-090121-777_G17
				a550846-4400671-090121-777_G19
				a550846-4400671-090121-777_G21
				a550846-4395515-050821-561_F17
				a550846-4400671-090121-777_G23
				a550846-4400671-090121-777_I01
				a550846-4400671-090121-777_I05
				a550846-4400671-090121-777_I07
				a550846-4400671-090121-777_I09
				a550846-4400671-090121-777_I11
				a550846-4400671-090121-777_I13
				a550846-4400671-090121-777_I15
				a550846-4400671-090121-777_I17
				a550846-4395515-050821-561_F19
				a550846-4400671-090121-777_I19
				a550846-4400671-090121-777_I21
				a550846-4400671-090121-777_I23
				a550846-4400671-090121-777_K01
				a550846-4400671-090121-777_K03
				a550846-4400671-090121-777_K05
				a550846-4400671-090121-777_K07
				a550846-4400671-090121-777_K09
				a550846-4400671-090121-777_K11
				a550846-4400671-090121-777_K13
				a550846-4395515-050821-561_F21
				a550846-4400671-090121-777_K15
				a550846-4400671-090121-777_K17
				a550846-4400671-090121-777_K19
				a550846-4400671-090121-777_K21
				a550846-4400671-090121-777_K23
				a550846-4400671-090121-777_M01
				a550846-4400671-090121-777_M03
				a550846-4400671-090121-777_M05
				a550846-4400671-090121-777_M07
				a550846-4400671-090121-777_M09
				a550846-4395515-050821-561_F23
				a550846-4400671-090121-777_M11
				a550846-4400671-090121-777_M13
				a550846-4400671-090121-777_M15
				a550846-4400671-090121-777_M17
				a550846-4400671-090121-777_M19
				a550846-4400671-090121-777_M21
				a550846-4400671-090121-777_M23
				a550846-4400671-090121-777_O01
				a550846-4400671-090121-777_O03
				a550846-4400671-090121-777_O05
				a550846-4395515-050821-561_H01
				a550846-4400671-090121-777_O07
				a550846-4400671-090121-777_O09
				a550846-4400671-090121-777_O11
				a550846-4400671-090121-777_O13
				a550846-4400671-090121-777_O15
				a550846-4400671-090121-777_O17
				a550846-4400671-090121-777_O19
				a550846-4400671-090121-777_O21
				a550846-4400671-090121-777_O23
				a550846-4400671-090121-777_A02
				a550846-4395515-050821-561_H03
				a550846-4400671-090121-777_A04
				a550846-4395515-050821-561_H05
				a550846-4395515-050821-561_D01
				a550846-4395515-050821-561_H07
				a550846-4395515-050821-561_H09
				a550846-4395515-050821-561_H11
				a550846-4395515-050821-561_H13
				a550846-4395515-050821-561_H15
				a550846-4395515-050821-561_H17
				a550846-4395515-050821-561_H19
				a550846-4395515-050821-561_H21
				a550846-4395515-050821-561_H23
				a550846-4395515-050821-561_J01
				a550846-4395515-050821-561_D03
				a550846-4395515-050821-561_J03
				a550846-4395515-050821-561_J05
				a550846-4395515-050821-561_J07
				a550846-4395515-050821-561_J09
				a550846-4400671-090121-777_J21
				a550846-4400671-090121-777_J23
				a550846-4400671-090121-777_L01
				a550846-4400671-090121-777_L03
				a550846-4400671-090121-777_L05
				a550846-4400671-090121-777_L07
				a550846-4400671-090121-777_L09
				a550846-4395515-050821-561_J11
				a550846-4400671-090121-777_L11
				a550846-4400671-090121-777_L13
				a550846-4400671-090121-777_L15
				a550846-4400671-090121-777_L17
				a550846-4400671-090121-777_L19
				a550846-4400671-090121-777_L21
				a550846-4400671-090121-777_L23
				a550846-4400671-090121-777_N01
				a550846-4400671-090121-777_N03
				a550846-4400671-090121-777_N05
				a550846-4395515-050821-561_J13
				a550846-4400671-090121-777_N07
				a550846-4400671-090121-777_N09
				a550846-4400671-090121-777_N11
				a550846-4400671-090121-777_N13
				a550846-4400671-090121-777_N15
				a550846-4400671-090121-777_N17
				a550846-4400671-090121-777_N19
				a550846-4400671-090121-777_I03
				a550846-4400671-090121-777_A06
				a550846-4400671-090121-777_A08
				a550846-4395515-050821-561_J15
				a550846-4400671-090121-777_A10
				a550846-4400671-090121-777_A12
				a550846-4400671-090121-777_A14
				a550846-4400671-090121-777_A16
				a550846-4400671-090121-777_A18
				a550846-4400671-090121-777_A20
				a550846-4400671-090121-777_A22
				a550846-4400671-090121-777_A24
				a550846-4400671-090121-777_C02
				a550846-4400671-090121-777_C04
				a550846-4395515-050821-561_J17
				a550846-4400671-090121-777_C06
				a550846-4400671-090121-777_C08
				a550846-4400671-090121-777_C10
				a550846-4400671-090121-777_C12
				a550846-4400671-090121-777_C14
				a550846-4400671-090121-777_C16
				a550846-4400671-090121-777_C18
				a550846-4400671-090121-777_C20
				a550846-4400671-090121-777_C22
				a550846-4400671-090121-777_C24
				a550846-4395515-050821-561_J19
				a550846-4400671-090121-777_E02
				a550846-4400671-090121-777_E04
				a550846-4400671-090121-777_E06
				a550846-4400671-090121-777_E08
				a550846-4400671-090121-777_E10
				a550846-4400671-090121-777_E12
				a550846-4400671-090121-777_E14
				a550846-4400671-090121-777_E16
				a550846-4400671-090121-777_E18
				a550846-4400671-090121-777_E20
				a550846-4395515-050821-561_J21
				a550846-4400671-090121-777_E22
				a550846-4400671-090121-777_E24
				a550846-4400671-090121-777_G02
				a550846-4400671-090121-777_G04
				a550846-4400671-090121-777_G06
				a550846-4400671-090121-777_G08
				a550846-4400671-090121-777_G10
				a550846-4400671-090121-777_G12
				a550846-4400671-090121-777_G14
				a550846-4400671-090121-777_G16
				a550846-4395515-050821-561_D05
				a550846-4395515-050821-561_J23
				a550846-4400671-090121-777_G18
				a550846-4400671-090121-777_G20
				a550846-4400671-090121-777_G22
				a550846-4400671-090121-777_G24
				a550846-4400671-090121-777_I02
				a550846-4400671-090121-777_I04
				a550846-4400671-090121-777_I06
				a550846-4400671-090121-777_I08
				a550846-4400671-090121-777_I10
				a550846-4400671-090121-777_I12
				a550846-4395515-050821-561_L01
				a550846-4400671-090121-777_I14
				a550846-4400671-090121-777_I16
				a550846-4400671-090121-777_I18
				a550846-4400671-090121-777_I20
				a550846-4400671-090121-777_I22
				a550846-4400671-090121-777_I24
				a550846-4400671-090121-777_K02
				a550846-4400671-090121-777_K04
				a550846-4400671-090121-777_K06
				a550846-4400671-090121-777_K08
				a550846-4395515-050821-561_L03
				a550846-4400671-090121-777_K10
				a550846-4400671-090121-777_K12
				a550846-4400671-090121-777_K14
				a550846-4400671-090121-777_K16
				a550846-4400671-090121-777_K18
				a550846-4400671-090121-777_K20
				a550846-4400671-090121-777_K22
				a550846-4400671-090121-777_K24
				a550846-4400671-090121-777_M02
				a550846-4400671-090121-777_M04
				a550846-4395515-050821-561_L05
				a550846-4400671-090121-777_M06
				a550846-4400671-090121-777_M08
				a550846-4400671-090121-777_M10
				a550846-4400671-090121-777_M12
				a550846-4400671-090121-777_M14
				a550846-4400671-090121-777_M16
				a550846-4400671-090121-777_M18
				a550846-4400671-090121-777_M20
				a550846-4400671-090121-777_M22
				a550846-4400671-090121-777_M24
				a550846-4395515-050821-561_L07
				a550846-4400671-090121-777_O02
				a550846-4400671-090121-777_O04
				a550846-4400671-090121-777_O06
				a550846-4400671-090121-777_O08
				a550846-4400671-090121-777_O10
				a550846-4400671-090121-777_O12
				a550846-4400671-090121-777_O14
				a550846-4400671-090121-777_O16
				a550846-4400671-090121-777_O18
				a550846-4400671-090121-777_O20
				a550846-4395515-050821-561_L09
				a550846-4400671-090121-777_O22
				a550846-4400671-090121-777_O24
				a550846-4400671-090121-777_B01
				a550846-4400671-090121-777_B03
				a550846-4400671-090121-777_B05
				a550846-4400671-090121-777_B07
				a550846-4400671-090121-777_B09
				a550846-4400671-090121-777_B11
				a550846-4400671-090121-777_B13
				a550846-4400671-090121-777_B15
				a550846-4395515-050821-561_L11
				a550846-4400671-090121-777_B17
				a550846-4400671-090121-777_B19
				a550846-4400671-090121-777_B21
				a550846-4400671-090121-777_B23
				a550846-4400671-090121-777_D01
				a550846-4400671-090121-777_D03
				a550846-4400671-090121-777_D05
				a550846-4400671-090121-777_D07
				a550846-4400671-090121-777_D09
				a550846-4400671-090121-777_D11
				a550846-4395515-050821-561_L13
				a550846-4400671-090121-777_D13
				a550846-4400671-090121-777_D15
				a550846-4400671-090121-777_D17
				a550846-4400671-090121-777_D19
				a550846-4400671-090121-777_D21
				a550846-4400671-090121-777_D23
				a550846-4400671-090121-777_F01
				a550846-4400671-090121-777_F03
				a550846-4400671-090121-777_F05
				a550846-4400671-090121-777_F07
				a550846-4395515-050821-561_L15
				a550846-4400671-090121-777_F09
				a550846-4400671-090121-777_F11
				a550846-4400671-090121-777_F13
				a550846-4400671-090121-777_F15
				a550846-4400671-090121-777_F17
				a550846-4400671-090121-777_F19
				a550846-4400671-090121-777_F21
				a550846-4400671-090121-777_F23
				a550846-4400671-090121-777_H01
				a550846-4400671-090121-777_H03
				a550846-4395515-050821-561_L17
				a550846-4400671-090121-777_H05
				a550846-4400671-090121-777_H07
				a550846-4400671-090121-777_H09
				a550846-4400671-090121-777_H11
				a550846-4400671-090121-777_H13
				a550846-4400671-090121-777_H15
				a550846-4400671-090121-777_H17
				a550846-4400671-090121-777_H19
				a550846-4400671-090121-777_H21
				a550846-4400671-090121-777_H23
				a550846-4395515-050821-561_D07
				a550846-4395515-050821-561_L19
				a550846-4400671-090121-777_J01
				a550846-4400671-090121-777_J03
				a550846-4400671-090121-777_J05
				a550846-4400671-090121-777_J07
				a550846-4400671-090121-777_J09
				a550846-4400671-090121-777_J11
				a550846-4400671-090121-777_J13
				a550846-4400671-090121-777_J15
				a550846-4400671-090121-777_J17
				a550846-4400671-090121-777_J19
				a550846-4395515-050821-561_L21
				a550846-4395515-050821-561_L23
				a550846-4395515-050821-561_N01
				a550846-4395515-050821-561_N03
				a550846-4395515-050821-561_N05
				a550846-4395515-050821-561_N07
				a550846-4395515-050821-561_N09
				a550846-4395515-050821-561_N11
				a550846-4395515-050821-561_N13
				a550846-4395515-050821-561_D09
				a550846-4395515-050821-561_N15
				a550846-4395515-050821-561_N17
				a550846-4395515-050821-561_N19
				a550846-4395515-050821-561_N21
				a550846-4395515-050821-561_N23
				a550846-4395515-050821-561_P01
				a550846-4395515-050821-561_P03
				a550846-4395515-050821-561_P05
				a550846-4395515-050821-561_P07
				a550846-4395515-050821-561_P09
				a550846-4395515-050821-561_D11
				a550846-4395515-050821-561_P11
				a550846-4395515-050821-561_P13
				a550846-4395515-050821-561_P15
				a550846-4395515-050821-561_P17
				a550846-4395515-050821-561_P19
				a550846-4395515-050821-561_P21
				a550846-4395515-050821-561_P23
				a550846-4395515-050821-561_B04
				a550846-4395515-050821-561_B06
				a550846-4395515-050821-561_D13
				a550846-4395515-050821-561_B08
				a550846-4395515-050821-561_B10
				a550846-4395515-050821-561_B12
				a550846-4395515-050821-561_B14
				a550846-4395515-050821-561_B16
				a550846-4395515-050821-561_B18
				a550846-4395515-050821-561_B20
				a550846-4395515-050821-561_B22
				a550846-4395515-050821-561_B24
				a550846-4395515-050821-561_D02
(13-1014x[A. ipaensis KG30076 x A. correntina 9530]4x_S0:5)_F1:4_F2	(13-1014 x IpaCor4x_S0:5)_F1:4_F2	4x	456	a550846-4400671-090121-777_N21		F2 progenies from F1 hybrids between A. hypogaea cultivated breeding line and IpaCor4x_S0
				a550846-4400671-090121-777_P15
				a550846-4400671-090121-777_P04
				a550846-4400671-090121-777_P06
				a550846-4400671-090121-777_P08
				a550846-4400671-090121-777_P10
				a550846-4400671-090121-777_P12
				a550846-4400671-090121-777_P14
				a550846-4400671-090121-777_P16
				a550846-4400671-090121-777_P18
				a550846-4400671-090121-777_P20
				a550846-4400671-090121-777_P22
				a550846-4400671-090121-777_P17
				a550846-4400671-090121-777_P24
				a550846-4399778-080221-681_A01
				a550846-4399778-080221-681_A03
				a550846-4399778-080221-681_A05
				a550846-4399778-080221-681_A07
				a550846-4399778-080221-681_A09
				a550846-4399778-080221-681_A11
				a550846-4399778-080221-681_A13
				a550846-4399778-080221-681_A15
				a550846-4399778-080221-681_A17
				a550846-4400671-090121-777_P19
				a550846-4399778-080221-681_A19
				a550846-4399778-080221-681_A21
				a550846-4399778-080221-681_A23
				a550846-4399778-080221-681_C01
				a550846-4399778-080221-681_C03
				a550846-4399778-080221-681_C05
				a550846-4399778-080221-681_C07
				a550846-4399778-080221-681_C09
				a550846-4399778-080221-681_C11
				a550846-4399778-080221-681_C13
				a550846-4400671-090121-777_P21
				a550846-4399778-080221-681_C15
				a550846-4399778-080221-681_C17
				a550846-4399778-080221-681_C19
				a550846-4399778-080221-681_C21
				a550846-4399778-080221-681_C23
				a550846-4399778-080221-681_E01
				a550846-4399778-080221-681_E03
				a550846-4399778-080221-681_E05
				a550846-4399778-080221-681_E07
				a550846-4399778-080221-681_E09
				a550846-4400671-090121-777_P23
				a550846-4399778-080221-681_E11
				a550846-4399778-080221-681_E13
				a550846-4399778-080221-681_E15
				a550846-4399778-080221-681_E17
				a550846-4399778-080221-681_E19
				a550846-4399778-080221-681_E21
				a550846-4399778-080221-681_E23
				a550846-4399778-080221-681_G01
				a550846-4399778-080221-681_G03
				a550846-4399778-080221-681_G05
				a550846-4400671-090121-777_B02
				a550846-4399778-080221-681_G07
				a550846-4399778-080221-681_G09
				a550846-4399778-080221-681_G11
				a550846-4399778-080221-681_G13
				a550846-4399778-080221-681_G15
				a550846-4399778-080221-681_G17
				a550846-4399778-080221-681_G19
				a550846-4399778-080221-681_G21
				a550846-4399778-080221-681_G23
				a550846-4399778-080221-681_I01
				a550846-4400671-090121-777_B04
				a550846-4399778-080221-681_I03
				a550846-4399778-080221-681_I05
				a550846-4399778-080221-681_I07
				a550846-4399778-080221-681_I09
				a550846-4399778-080221-681_I11
				a550846-4399778-080221-681_I13
				a550846-4399778-080221-681_I15
				a550846-4399778-080221-681_I17
				a550846-4399778-080221-681_I19
				a550846-4399778-080221-681_I21
				a550846-4400671-090121-777_B06
				a550846-4399778-080221-681_I23
				a550846-4399778-080221-681_K01
				a550846-4399778-080221-681_K03
				a550846-4399778-080221-681_K05
				a550846-4399778-080221-681_K07
				a550846-4399778-080221-681_K09
				a550846-4399778-080221-681_K11
				a550846-4399778-080221-681_K13
				a550846-4399778-080221-681_K15
				a550846-4399778-080221-681_K17
				a550846-4400671-090121-777_B08
				a550846-4399778-080221-681_K19
				a550846-4399778-080221-681_K21
				a550846-4399778-080221-681_K23
				a550846-4399778-080221-681_M01
				a550846-4399778-080221-681_M03
				a550846-4399778-080221-681_M05
				a550846-4399778-080221-681_M07
				a550846-4399778-080221-681_M09
				a550846-4399778-080221-681_M11
				a550846-4399778-080221-681_M13
				a550846-4400671-090121-777_B10
				a550846-4399778-080221-681_M15
				a550846-4399778-080221-681_M17
				a550846-4399778-080221-681_M19
				a550846-4399778-080221-681_M21
				a550846-4399778-080221-681_M23
				a550846-4399778-080221-681_O01
				a550846-4399778-080221-681_O03
				a550846-4399778-080221-681_O05
				a550846-4399778-080221-681_O07
				a550846-4399778-080221-681_O09
				a550846-4400671-090121-777_N23
				a550846-4400671-090121-777_B12
				a550846-4399778-080221-681_O11
				a550846-4399778-080221-681_O13
				a550846-4399778-080221-681_O15
				a550846-4399778-080221-681_O17
				a550846-4399778-080221-681_O19
				a550846-4399778-080221-681_O21
				a550846-4399778-080221-681_O23
				a550846-4399778-080221-681_A02
				a550846-4399778-080221-681_A04
				a550846-4399778-080221-681_A06
				a550846-4400671-090121-777_B14
				a550846-4399778-080221-681_A08
				a550846-4399778-080221-681_A10
				a550846-4399778-080221-681_A12
				a550846-4399778-080221-681_A14
				a550846-4399778-080221-681_A16
				a550846-4399778-080221-681_A18
				a550846-4399778-080221-681_A20
				a550846-4399778-080221-681_A22
				a550846-4399778-080221-681_A24
				a550846-4399778-080221-681_C02
				a550846-4400671-090121-777_B16
				a550846-4399778-080221-681_C04
				a550846-4399778-080221-681_C06
				a550846-4399778-080221-681_C08
				a550846-4399778-080221-681_C10
				a550846-4399778-080221-681_C12
				a550846-4399778-080221-681_C14
				a550846-4399778-080221-681_C16
				a550846-4399778-080221-681_C18
				a550846-4399778-080221-681_C20
				a550846-4399778-080221-681_C22
				a550846-4400671-090121-777_B18
				a550846-4399778-080221-681_C24
				a550846-4399778-080221-681_E02
				a550846-4399778-080221-681_E04
				a550846-4399778-080221-681_E06
				a550846-4399778-080221-681_E08
				a550846-4399778-080221-681_E10
				a550846-4399778-080221-681_E12
				a550846-4399778-080221-681_E14
				a550846-4399778-080221-681_E16
				a550846-4399778-080221-681_E18
				a550846-4400671-090121-777_B20
				a550846-4399778-080221-681_E20
				a550846-4399778-080221-681_E22
				a550846-4399778-080221-681_E24
				a550846-4399778-080221-681_G02
				a550846-4399778-080221-681_G04
				a550846-4399778-080221-681_G06
				a550846-4399778-080221-681_G08
				a550846-4399778-080221-681_G10
				a550846-4399778-080221-681_G12
				a550846-4399778-080221-681_G14
				a550846-4400671-090121-777_B22
				a550846-4399778-080221-681_G16
				a550846-4399778-080221-681_G18
				a550846-4399778-080221-681_G20
				a550846-4399778-080221-681_G22
				a550846-4399778-080221-681_G24
				a550846-4399778-080221-681_I02
				a550846-4399778-080221-681_I04
				a550846-4399778-080221-681_I06
				a550846-4399778-080221-681_I08
				a550846-4399778-080221-681_I10
				a550846-4400671-090121-777_B24
				a550846-4399778-080221-681_I12
				a550846-4399778-080221-681_I14
				a550846-4399778-080221-681_I16
				a550846-4399778-080221-681_I18
				a550846-4399778-080221-681_I20
				a550846-4399778-080221-681_I22
				a550846-4399778-080221-681_I24
				a550846-4399778-080221-681_K02
				a550846-4399778-080221-681_K04
				a550846-4399778-080221-681_K06
				a550846-4400671-090121-777_D02
				a550846-4399778-080221-681_K08
				a550846-4399778-080221-681_K10
				a550846-4399778-080221-681_K12
				a550846-4399778-080221-681_K14
				a550846-4399778-080221-681_K16
				a550846-4399778-080221-681_K18
				a550846-4399778-080221-681_K20
				a550846-4399778-080221-681_K22
				a550846-4399778-080221-681_K24
				a550846-4399778-080221-681_M02
				a550846-4400671-090121-777_D04
				a550846-4399778-080221-681_M04
				a550846-4399778-080221-681_M06
				a550846-4399778-080221-681_M08
				a550846-4399778-080221-681_M10
				a550846-4399778-080221-681_M12
				a550846-4399778-080221-681_M14
				a550846-4399778-080221-681_M16
				a550846-4399778-080221-681_M18
				a550846-4399778-080221-681_M20
				a550846-4399778-080221-681_M22
				a550846-4400671-090121-777_D06
				a550846-4399778-080221-681_M24
				a550846-4399778-080221-681_O02
				a550846-4399778-080221-681_O04
				a550846-4399778-080221-681_O06
				a550846-4399778-080221-681_O08
				a550846-4399778-080221-681_O10
				a550846-4399778-080221-681_O12
				a550846-4399778-080221-681_O14
				a550846-4399778-080221-681_O16
				a550846-4399778-080221-681_O18
				a550846-4400671-090121-777_P01
				a550846-4400671-090121-777_D08
				a550846-4399778-080221-681_O20
				a550846-4399778-080221-681_O22
				a550846-4399778-080221-681_O24
				a550846-4399778-080221-681_B01
				a550846-4399778-080221-681_B03
				a550846-4399778-080221-681_B05
				a550846-4399778-080221-681_B07
				a550846-4399778-080221-681_B09
				a550846-4399778-080221-681_B11
				a550846-4399778-080221-681_B13
				a550846-4400671-090121-777_D10
				a550846-4399778-080221-681_B15
				a550846-4399778-080221-681_B17
				a550846-4399778-080221-681_B19
				a550846-4399778-080221-681_B21
				a550846-4399778-080221-681_B23
				a550846-4399778-080221-681_D01
				a550846-4399778-080221-681_D03
				a550846-4399778-080221-681_D05
				a550846-4399778-080221-681_D07
				a550846-4399778-080221-681_D09
				a550846-4400671-090121-777_D12
				a550846-4399778-080221-681_D11
				a550846-4399778-080221-681_D13
				a550846-4399778-080221-681_D15
				a550846-4399778-080221-681_D17
				a550846-4399778-080221-681_D19
				a550846-4399778-080221-681_D21
				a550846-4399778-080221-681_D23
				a550846-4399778-080221-681_F01
				a550846-4399778-080221-681_F03
				a550846-4399778-080221-681_F05
				a550846-4400671-090121-777_D14
				a550846-4399778-080221-681_F07
				a550846-4399778-080221-681_F09
				a550846-4399778-080221-681_F11
				a550846-4399778-080221-681_F13
				a550846-4399778-080221-681_F15
				a550846-4399778-080221-681_F17
				a550846-4399778-080221-681_F19
				a550846-4399778-080221-681_F21
				a550846-4399778-080221-681_F23
				a550846-4399778-080221-681_H01
				a550846-4400671-090121-777_D16
				a550846-4399778-080221-681_H03
				a550846-4399778-080221-681_H05
				a550846-4399778-080221-681_H07
				a550846-4399778-080221-681_H09
				a550846-4399778-080221-681_H11
				a550846-4399778-080221-681_H13
				a550846-4399778-080221-681_H15
				a550846-4399778-080221-681_H17
				a550846-4399778-080221-681_H19
				a550846-4399778-080221-681_H21
				a550846-4400671-090121-777_D18
				a550846-4399778-080221-681_H23
				a550846-4399778-080221-681_J01
				a550846-4399778-080221-681_J03
				a550846-4399778-080221-681_J05
				a550846-4399778-080221-681_J07
				a550846-4399778-080221-681_J09
				a550846-4399778-080221-681_J11
				a550846-4399778-080221-681_J13
				a550846-4399778-080221-681_J15
				a550846-4399778-080221-681_J17
				a550846-4400671-090121-777_D20
				a550846-4399778-080221-681_J19
				a550846-4399778-080221-681_J21
				a550846-4399778-080221-681_J23
				a550846-4399778-080221-681_L01
				a550846-4399778-080221-681_L03
				a550846-4399778-080221-681_L05
				a550846-4399778-080221-681_L07
				a550846-4399778-080221-681_L09
				a550846-4399778-080221-681_L11
				a550846-4399778-080221-681_L13
				a550846-4400671-090121-777_D22
				a550846-4399778-080221-681_L15
				a550846-4399778-080221-681_L17
				a550846-4399778-080221-681_L19
				a550846-4399778-080221-681_L21
				a550846-4399778-080221-681_L23
				a550846-4399778-080221-681_N01
				a550846-4399778-080221-681_N03
				a550846-4399778-080221-681_N05
				a550846-4399778-080221-681_N07
				a550846-4399778-080221-681_N09
				a550846-4400671-090121-777_D24
				a550846-4399778-080221-681_N11
				a550846-4399778-080221-681_N13
				a550846-4399778-080221-681_N15
				a550846-4399778-080221-681_N17
				a550846-4399778-080221-681_N19
				a550846-4399778-080221-681_N21
				a550846-4399778-080221-681_N23
				a550846-4399778-080221-681_P01
				a550846-4399778-080221-681_P03
				a550846-4399778-080221-681_P05
				a550846-4400671-090121-777_F02
				a550846-4399778-080221-681_P07
				a550846-4399778-080221-681_P09
				a550846-4399778-080221-681_P11
				a550846-4399778-080221-681_P13
				a550846-4399778-080221-681_P15
				a550846-4399778-080221-681_P17
				a550846-4399778-080221-681_P19
				a550846-4399778-080221-681_P21
				a550846-4399778-080221-681_P23
				a550846-4399778-080221-681_B02
				a550846-4400671-090121-777_P03
				a550846-4400671-090121-777_F04
				a550846-4399778-080221-681_B04
				a550846-4399778-080221-681_B06
				a550846-4399778-080221-681_B08
				a550846-4399778-080221-681_B10
				a550846-4399778-080221-681_B12
				a550846-4399778-080221-681_B14
				a550846-4399778-080221-681_B16
				a550846-4399778-080221-681_B18
				a550846-4399778-080221-681_B20
				a550846-4399778-080221-681_B22
				a550846-4400671-090121-777_F06
				a550846-4399778-080221-681_B24
				a550846-4399778-080221-681_D02
				a550846-4399778-080221-681_D04
				a550846-4399778-080221-681_D06
				a550846-4399778-080221-681_D08
				a550846-4399778-080221-681_D10
				a550846-4399778-080221-681_D12
				a550846-4399778-080221-681_D14
				a550846-4399778-080221-681_D16
				a550846-4399778-080221-681_D18
				a550846-4400671-090121-777_F08
				a550846-4399778-080221-681_D20
				a550846-4399778-080221-681_D22
				a550846-4399778-080221-681_D24
				a550846-4399778-080221-681_F02
				a550846-4399778-080221-681_F04
				a550846-4399778-080221-681_F06
				a550846-4399778-080221-681_F08
				a550846-4399778-080221-681_F10
				a550846-4399778-080221-681_F12
				a550846-4399778-080221-681_F14
				a550846-4400671-090121-777_F10
				a550846-4399778-080221-681_F16
				a550846-4399778-080221-681_F18
				a550846-4399778-080221-681_F20
				a550846-4399778-080221-681_F22
				a550846-4399778-080221-681_F24
				a550846-4399778-080221-681_H02
				a550846-4399778-080221-681_H04
				a550846-4399778-080221-681_H06
				a550846-4399778-080221-681_H08
				a550846-4399778-080221-681_H10
				a550846-4400671-090121-777_F12
				a550846-4399778-080221-681_H12
				a550846-4399778-080221-681_H14
				a550846-4399778-080221-681_H16
				a550846-4399778-080221-681_H18
				a550846-4399778-080221-681_H20
				a550846-4399778-080221-681_H22
				a550846-4399778-080221-681_H24
				a550846-4399778-080221-681_J02
				a550846-4399778-080221-681_J04
				a550846-4399778-080221-681_J06
				a550846-4400671-090121-777_F14
				a550846-4399778-080221-681_J08
				a550846-4399778-080221-681_J10
				a550846-4399778-080221-681_J12
				a550846-4399778-080221-681_J14
				a550846-4399778-080221-681_J16
				a550846-4399778-080221-681_J18
				a550846-4399778-080221-681_J20
				a550846-4400671-090121-777_F16
				a550846-4400671-090121-777_F18
				a550846-4400671-090121-777_F20
				a550846-4400671-090121-777_F22
				a550846-4400671-090121-777_P05
				a550846-4400671-090121-777_F24
				a550846-4400671-090121-777_H02
				a550846-4400671-090121-777_H04
				a550846-4400671-090121-777_H06
				a550846-4400671-090121-777_H08
				a550846-4400671-090121-777_H10
				a550846-4400671-090121-777_H12
				a550846-4400671-090121-777_H14
				a550846-4400671-090121-777_H16
				a550846-4400671-090121-777_H18
				a550846-4400671-090121-777_P07
				a550846-4400671-090121-777_H20
				a550846-4400671-090121-777_H22
				a550846-4400671-090121-777_H24
				a550846-4400671-090121-777_J02
				a550846-4400671-090121-777_J04
				a550846-4400671-090121-777_J06
				a550846-4400671-090121-777_J08
				a550846-4400671-090121-777_J10
				a550846-4400671-090121-777_J12
				a550846-4400671-090121-777_J14
				a550846-4400671-090121-777_P09
				a550846-4400671-090121-777_J16
				a550846-4400671-090121-777_J18
				a550846-4400671-090121-777_J20
				a550846-4400671-090121-777_J22
				a550846-4400671-090121-777_J24
				a550846-4400671-090121-777_L02
				a550846-4400671-090121-777_L04
				a550846-4400671-090121-777_L06
				a550846-4400671-090121-777_L08
				a550846-4400671-090121-777_L10
				a550846-4400671-090121-777_P11
				a550846-4400671-090121-777_L12
				a550846-4400671-090121-777_L14
				a550846-4400671-090121-777_L16
				a550846-4400671-090121-777_L18
				a550846-4400671-090121-777_L20
				a550846-4400671-090121-777_L22
				a550846-4400671-090121-777_L24
				a550846-4400671-090121-777_N02
				a550846-4400671-090121-777_N04
				a550846-4400671-090121-777_N06
				a550846-4400671-090121-777_P13
				a550846-4400671-090121-777_N08
				a550846-4400671-090121-777_N10
				a550846-4400671-090121-777_N12
				a550846-4400671-090121-777_N14
				a550846-4400671-090121-777_N16
				a550846-4400671-090121-777_N18
				a550846-4400671-090121-777_N20
				a550846-4400671-090121-777_N22
				a550846-4400671-090121-777_N24
				a550846-4400671-090121-777_P02

## Sheet: Table S2
Table S2. Markers demonstrating homoeologous recombination in IpaCor4x_S0 and S1 plants other than those listed in table 1
probeset_id	Chr_id	SNP position	Ipa	Cor	IpaCor2x_col	IpaCor4x_S0:2	IpaCor4x_S0:2_S1:1	IpaCor4x_S0:2_S1:2	IpaCor4x_S0:2_S1:3	IpaCor4x_S0:2_S1:4	IpaCor4x_S0:2_S1:5	IpaCor4x_S0:2_S1:6	IpaCor4x_S0:2_S1:7	IpaCor4x_S0:5	IpaCor4x_S0:6	IpaCor4x_S0:10	IpaCor4x_S0:11	IpaCor4x_S0:12
AX-147243032	Araip.B03	2065843	0	2	1	1	75% of 2	1	1	1	1	1	1	1	1	0	0	0
AX-147215295	Araip.B03	2289326	0	2	1	1	75% of 2	1	1	1	1	1	1	1	1	1	1	1
AX-176791680	Araip.B03	2643570	2	0	1	1	75% of 0	1	1	1	1	1	1	1	1	1	1	1
AX-147243108	Araip.B03	2720233	0	2	1	1	75% of 2	1	1	1	1	1	1	1	1	1	1	1
AX-147215365	Araip.B03	3332357	0	2	1	1	75% of 2	1	1	1	1	1	1	1	1	1	1	1
AX-147243174	Araip.B03	3619955	0	2	1	1	75% of 2	1	1	1	1	1	1	1	1	1	1	1
AX-147215404	Araip.B03	3706821	2	0	1	1	75% of 0	1	1	1	1	1	1	1	1	2	2	2
AX-147215426	Araip.B03	3974813	2	0	1	1	75% of 0	1	1	1	1	1	1	1	1	2	2	2
AX-176797379	Araip.B03	4104588	2	0	1	1	75% of 0	1	1	1	1	1	1	1	1	2	2	2
AX-147215468	Araip.B03	4580140	0	2	1	1	75% of 2	1	1	1	1	1	1	1	1	1	1	1
AX-147243256	Araip.B03	4859035	0	2	1	1	75% of 2	1	1	1	1	1	1	1	1	1	1	1
AX-147243258	Araip.B03	4897332	0	2	1	1	75% of 2	1	1	1	1	1	1	1	1	1	1	1
AX-147215507	Araip.B03	5499712	2	0	1	1	75% of 0	1	1	1	1	1	1	1	1	2	2	2
AX-147215531	Araip.B03	5951334	2	0	1	1	75% of 0	1	1	1	1	1	1	1	1	2	2	2
AX-147215535	Araip.B03	5966735	0	2	1	1	75% of 2	1	1	1	1	1	1	1	1	1	1	1
AX-147215563	Araip.B03	6442041	0	2	1	1	75% of 2	1	1	1	1	1	1	1	1	1	1	1
AX-147215567	Araip.B03	6468118	2	0	1	1	75% of 0	1	1	1	1	1	1	1	1	1	1	1
AX-147215591	Araip.B03	6766202	2	0	1	1	75% of 0	1	1	1	1	1	1	1	1	2	2	2
AX-147243417	Araip.B03	7115308	2	0	1	1	75% of 0	1	1	1	1	1	1	1	1	1	1	1
AX-147246405	Araip.B04	613773	2	0	1	1	1	1	1	1	1	1	75% of 2	1	1	1	1	75% of 0
AX-147246450	Araip.B04	998790	0	2	1	1	1	1	1	1	1	1	75% of 0	1	1	1	1	75% of 2
AX-147218827	Araip.B04	1207385	0	2	1	1	1	1	1	1	1	1	75% of 0	1	1	1	1	75% of 2
AX-147218839	Araip.B04	1299601	2	0	1	1	1	1	1	1	1	1	75% of 2	1	1	1	1	75% of 0
AX-147246496	Araip.B04	1530657	0	2	1	1	1	1	1	1	1	1	75% of 0	1	1	1	1	75% of 2
AX-147218872	Araip.B04	1680468	2	0	1	1	1	1	1	1	1	1	75% of 2	1	1	1	1	75% of 0
AX-147218879	Araip.B04	1721526	2	0	1	1	1	1	1	1	1	1	75% of 2	1	1	1	1	75% of 0
AX-147246610	Araip.B04	2446164	0	2	1	1	1	1	1	1	1	1	75% of 0	1	1	1	1	75% of 2
AX-147246628	Araip.B04	2660449	0	2	1	1	1	1	1	1	1	1	75% of 0	1	1	1	1	75% of 2
AX-147218976	Araip.B04	2743764	0	2	1	1	1	1	1	1	1	1	75% of 0	1	1	1	1	75% of 2
AX-147218990	Araip.B04	3490627	2	0	1	1	1	1	1	1	1	1	75% of 2	1	1	1	1	75% of 0
AX-147219016	Araip.B04	3839844	0	2	1	1	1	1	1	1	1	1	75% of 0	1	1	1	1	75% of 2
AX-147246729	Araip.B04	4215943	0	2	1	1	1	1	1	1	1	1	75% of 0	1	1	1	1	75% of 2
AX-147246752	Araip.B04	4420103	0	2	1	1	75% of 2	1	1	1	1	1	75% of 0	1	1	1	1	75% of 2
AX-176791642	Araip.B04	4516806	0	2	1	1	75% of 2	1	1	1	1	1	75% of 0	1	1	1	1	75% of 2
AX-147246795	Araip.B04	4817699	2	0	1	1	75% of 0	1	1	1	1	1	75% of 2	1	1	1	1	75% of 0
AX-147219133	Araip.B04	4928919	2	0	1	1	75% of 0	1	1	1	1	1	75% of 2	1	1	1	1	75% of 0
AX-147246871	Araip.B04	5595266	2	0	1	1	75% of 0	1	1	1	1	1	75% of 2	1	1	1	1	1
AX-147246873	Araip.B04	5604508	2	0	1	1	75% of 0	1	1	1	1	1	75% of 2	1	1	1	1	75% of 0
AX-147246890	Araip.B04	5862449	0	2	1	1	75% of 2	1	1	1	1	1	75% of 0	1	1	1	1	75% of 2
AX-147246904	Araip.B04	6128842	0	2	1	1	75% of 2	1	1	1	1	1	75% of 0	1	1	1	1	75% of 2
AX-147246922	Araip.B04	6682105	0	2	1	1	75% of 2	1	1	1	1	1	75% of 0	1	1	1	1	75% of 2
AX-176813312	Araip.B04	7032532	0	2	1	1	75% of 2	1	1	1	1	1	75% of 0	1	1	1	1	75% of 2
AX-147246945	Araip.B04	7505480	0	2	1	1	75% of 2	1	1	1	1	1	75% of 0	1	1	1	1	75% of 2
AX-147246972	Araip.B04	8306108	2	0	1	1	75% of 0	1	1	1	1	1	75% of 2	1	1	1	1	75% of 0
AX-147219283	Araip.B04	8495985	0	2	1	1	75% of 2	1	1	1	1	1	75% of 0	1	1	1	1	75% of 2
AX-147247002	Araip.B04	8681364	0	2	1	1	75% of 2	1	1	1	1	1	75% of 0	1	1	1	1	75% of 2
AX-147247005	Araip.B04	8691137	0	2	1	1	75% of 2	1	1	1	1	1	75% of 0	1	1	1	1	75% of 2
AX-147247011	Araip.B04	8741509	0	2	1	1	75% of 2	1	1	1	1	1	75% of 0	1	1	1	1	75% of 2
AX-147247038	Araip.B04	9488171	2	0	1	1	75% of 0	1	1	1	1	1	75% of 2	1	1	1	1	75% of 0
AX-147247045	Araip.B04	9716663	0	2	1	1	75% of 2	1	1	1	1	1	75% of 0	1	1	1	1	75% of 2
AX-147247109	Araip.B04	10998851	0	2	1	1	75% of 2	1	1	1	1	1	75% of 0	1	1	1	1	75% of 2
AX-147219499	Araip.B04	13624024	2	0	1	1	75% of 0	1	1	1	1	1	75% of 2	1	1	1	1	75% of 0
AX-147247176	Araip.B04	13892409	2	0	1	1	75% of 0	1	1	1	1	1	75% of 2	1	1	1	1	75% of 0
AX-147219586	Araip.B04	16036352	2	0	1	1	75% of 0	1	1	1	1	1	75% of 2	1	1	1	1	75% of 0
AX-147247261	Araip.B04	16301350	0	2	1	1	75% of 2	1	1	1	1	1	75% of 0	1	1	1	1	1
AX-147247264	Araip.B04	16989730	2	0	1	1	75% of 0	1	1	1	1	1	75% of 2	1	1	1	1	75% of 0
AX-147219620	Araip.B04	17382311	0	2	1	1	75% of 2	1	1	1	1	1	75% of 0	1	1	1	1	75% of 2
AX-147247289	Araip.B04	17552523	0	2	1	1	75% of 2	1	1	1	1	1	75% of 0	1	1	1	1	75% of 2
AX-147219646	Araip.B04	17999998	2	0	1	1	75% of 0	1	1	1	1	1	75% of 2	1	1	1	1	75% of 0
AX-147219681	Araip.B04	20539321	2	0	1	1	75% of 0	1	1	1	1	1	75% of 2	1	1	1	1	75% of 0
AX-176796785	Araip.B04	20879866	0	2	1	1	75% of 2	1	1	1	1	1	75% of 0	1	1	1	1	75% of 2
AX-147247368	Araip.B04	20882150	2	0	1	1	75% of 0	1	1	1	1	1	75% of 2	1	1	1	1	75% of 0
AX-147219721	Araip.B04	21204195	0	0	1	1	75% of 2	1	1	1	1	1	75% of 0	1	1	1	1	75% of 2
AX-176791378	Araip.B04	25635381	2	0	1	1	75% of 0	1	1	1	1	1	75% of 2	1	1	1	1	75% of 0
AX-147219783	Araip.B04	25638266	0	2	1	1	75% of 2	1	1	1	1	1	75% of 0	1	1	1	1	75% of 2
AX-147247475	Araip.B04	27988550	2	0	1	1	75% of 0	1	1	1	1	1	75% of 2	1	1	1	1	75% of 0
AX-147219826	Araip.B04	29563967	2	0	1	1	75% of 0	1	1	1	1	1	75% of 2	1	1	1	1	75% of 0
AX-147247493	Araip.B04	29672339	2	0	1	1	75% of 0	1	1	1	1	1	75% of 2	1	1	1	1	75% of 0
AX-147219833	Araip.B04	29694789	0	2	1	1	75% of 2	1	1	1	1	1	75% of 0	1	1	1	1	75% of 2
AX-147219834	Araip.B04	29695061	2	0	1	1	75% of 0	1	1	1	1	1	75% of 2	1	1	1	1	75% of 0
AX-147247508	Araip.B04	30760719	2	0	1	1	75% of 0	1	1	1	1	1	75% of 2	1	1	1	1	75% of 0
AX-147220544	Araip.B04	31166203	0	2	1	1	75% of 2	1	1	1	1	1	75% of 0	1	1	1	1	75% of 2
AX-147219889	Araip.B04	34380876	0	2	1	1	75% of 2	1	1	1	1	1	75% of 0	1	1	1	1	75% of 2
AX-147219919	Araip.B04	39125131	0	2	1	1	75% of 2	1	1	1	1	1	75% of 0	1	1	1	1	75% of 2
AX-147247576	Araip.B04	40056846	2	0	1	1	75% of 0	1	1	1	1	1	75% of 2	1	1	1	1	75% of 0
AX-147247577	Araip.B04	40059392	2	0	1	1	75% of 0	1	1	1	1	1	75% of 2	1	1	1	1	75% of 0
AX-147219935	Araip.B04	40061129	2	0	1	1	75% of 0	1	1	1	1	1	75% of 2	1	1	1	1	75% of 0
AX-147219939	Araip.B04	40080419	0	2	1	1	75% of 2	1	1	1	1	1	75% of 0	1	1	1	1	1
AX-147220002	Araip.B04	45421472	2	0	1	1	75% of 0	1	1	1	1	1	75% of 2	1	1	1	1	75% of 0
AX-147247606	Araip.B04	45421724	2	0	1	1	75% of 0	1	1	1	1	1	75% of 2	1	1	1	1	75% of 0
AX-147220005	Araip.B04	45422672	2	0	1	1	75% of 0	1	1	1	1	1	75% of 2	1	1	1	1	75% of 0
AX-147247611	Araip.B04	46100243	0	2	1	1	75% of 2	1	1	1	1	1	75% of 0	1	1	1	1	75% of 2
AX-176791486	Araip.B04	58979763	0	2	1	1	75% of 2	1	1	1	1	1	75% of 0	1	1	1	1	1
AX-147220034	Araip.B04	73933960	0	2	1	1	75% of 2	1	1	1	1	1	75% of 0	1	1	1	1	75% of 2
AX-147247675	Araip.B04	73934886	2	0	1	1	75% of 0	1	1	1	1	1	75% of 2	1	1	1	1	75% of 0
AX-147220124	Araip.B04	78498383	0	2	1	1	75% of 2	1	1	1	1	1	75% of 0	1	1	1	1	75% of 2
AX-147247734	Araip.B04	82325476	0	2	1	1	75% of 2	1	1	1	1	1	75% of 0	1	1	1	1	75% of 2
AX-147247737	Araip.B04	82843790	0	2	1	1	75% of 2	1	1	1	1	1	75% of 0	1	1	1	1	75% of 2
AX-147220163	Araip.B04	82844303	0	2	1	1	75% of 2	1	1	1	1	1	75% of 0	1	1	1	1	75% of 2
AX-147220178	Araip.B04	83529312	0	2	1	1	75% of 2	1	1	1	1	1	75% of 0	1	1	1	1	75% of 2
AX-147247743	Araip.B04	84727864	0	2	1	1	75% of 2	1	1	1	1	1	75% of 0	1	1	1	1	75% of 2
AX-147247745	Araip.B04	85232987	0	2	1	1	75% of 2	1	1	1	1	1	75% of 0	1	1	1	1	75% of 2
AX-147247746	Araip.B04	85261373	2	0	1	1	75% of 0	1	1	1	1	1	75% of 2	1	1	1	1	75% of 0
AX-147220197	Araip.B04	85261716	0	2	1	1	75% of 2	1	1	1	1	1	75% of 0	1	1	1	1	75% of 2
AX-147220204	Araip.B04	87548549	0	2	1	1	75% of 2	1	1	1	1	1	75% of 0	1	1	1	1	1
AX-147247752	Araip.B04	88398643	0	2	1	1	75% of 2	1	1	1	1	1	75% of 0	1	1	1	1	75% of 2
AX-147220214	Araip.B04	88923408	0	2	1	1	75% of 2	1	1	1	1	1	75% of 0	1	1	1	1	75% of 2
AX-147220229	Araip.B04	89464090	0	2	1	1	75% of 2	1	1	1	1	1	75% of 0	1	1	1	1	1
AX-147219881	Araip.B04	91386649	2	0	1	1	75% of 0	1	1	1	1	1	75% of 2	1	1	1	1	75% of 0
AX-147247789	Araip.B04	95746839	2	0	1	1	75% of 2	1	1	1	1	1	75% of 2	1	1	1	1	75% of 2
AX-147220376	Araip.B04	105224345	0	2	1	1	75% of 2	1	1	1	1	1	75% of 0	1	1	1	1	75% of 2
AX-147247988	Araip.B04	109901141	2	0	1	1	75% of 0	1	1	1	1	1	75% of 2	1	1	1	1	75% of 0
AX-147220430	Araip.B04	110110859	0	2	1	1	75% of 2	1	1	1	1	1	75% of 0	1	1	1	1	75% of 2
AX-147220460	Araip.B04	111763487	0	2	1	1	75% of 2	1	1	1	1	1	75% of 0	1	1	1	1	75% of 2
AX-147220464	Araip.B04	111980482	2	0	1	1	75% of 0	1	1	1	1	1	75% of 2	1	1	1	1	75% of 0
AX-147248074	Araip.B04	113767135	2	0	1	1	75% of 0	1	1	1	1	1	75% of 2	1	1	1	1	75% of 0
AX-147248076	Araip.B04	113774102	0	2	1	1	75% of 2	1	1	1	1	1	75% of 0	1	1	1	1	75% of 2
AX-147248084	Araip.B04	113979833	2	0	1	1	75% of 0	1	1	1	1	1	75% of 2	1	1	1	1	75% of 0
AX-147220529	Araip.B04	113984760	2	0	1	1	75% of 0	1	1	1	1	1	75% of 2	1	1	1	1	75% of 0
AX-147220591	Araip.B04	115665916	2	0	1	1	75% of 0	1	1	1	1	1	75% of 2	1	1	1	1	75% of 0
AX-147220592	Araip.B04	115667707	0	2	1	1	75% of 2	1	1	1	1	1	75% of 0	1	1	1	1	75% of 2
AX-147248188	Araip.B04	116451446	0	2	1	1	75% of 2	1	1	1	1	1	75% of 0	1	1	1	1	75% of 2
AX-147220642	Araip.B04	116994864	0	2	1	1	75% of 2	1	1	1	1	1	75% of 0	1	1	1	1	75% of 2
AX-147220687	Araip.B04	118380703	2	0	1	1	75% of 0	1	1	1	1	1	75% of 2	1	1	1	1	1
AX-147248269	Araip.B04	119395826	2	0	1	1	75% of 0	1	1	1	1	1	75% of 2	1	1	1	1	75% of 0
AX-147220712	Araip.B04	119437232	0	2	1	1	75% of 2	1	1	1	1	1	75% of 0	1	1	1	1	75% of 2
AX-147248282	Araip.B04	120376943	2	0	1	1	75% of 0	1	1	1	1	1	75% of 2	1	1	1	1	1
AX-147220772	Araip.B04	121329242	2	0	1	1	75% of 0	1	1	1	1	1	75% of 2	1	1	1	1	75% of 0
AX-147248328	Araip.B04	121585266	2	0	1	1	75% of 0	1	1	1	1	1	75% of 2	1	1	1	1	75% of 0
AX-147248329	Araip.B04	121585570	2	0	1	1	75% of 0	1	1	1	1	1	75% of 2	1	1	1	1	75% of 0
AX-147248335	Araip.B04	121682980	0	2	1	1	75% of 2	1	1	1	1	1	75% of 0	1	1	1	1	75% of 2
AX-176791630	Araip.B04	122508440	0	2	1	1	75% of 2	1	1	1	1	1	75% of 0	1	1	1	75% of 0	1
AX-147220849	Araip.B04	123807791	2	0	1	1	75% of 0	1	1	1	1	1	75% of 2	1	1	1	75% of 2	75% of 0
AX-147248401	Araip.B04	124017816	2	0	1	1	75% of 0	1	1	1	1	1	75% of 2	1	1	1	75% of 2	75% of 0
AX-147248402	Araip.B04	124023584	2	0	1	1	75% of 0	1	1	1	1	1	75% of 2	1	1	1	75% of 2	75% of 0
AX-147248422	Araip.B04	124269424	0	2	1	1	75% of 2	1	1	1	1	1	75% of 0	1	1	1	75% of 0	75% of 2
AX-147248424	Araip.B04	124298527	0	2	1	1	75% of 2	1	1	1	1	1	75% of 0	1	1	1	75% of 0	75% of 2
AX-176791631	Araip.B04	124301830	2	0	1	1	75% of 0	1	1	1	1	1	75% of 2	1	1	1	75% of 2	1
AX-147221467	Araip.B05	1426280	2	0	1	1	1	1	1	1	75% of 2	1	1	1	75% of 0	1	1	1
AX-147221593	Araip.B05	6425776	0	2	1	1	1	1	1	1	75% of 0	1	1	1	75% of 2	1	1	1
AX-147221630	Araip.B05	7141413	0	2	1	1	1	1	1	1	75% of 0	1	1	1	75% of 2	1	1	1
AX-147249076	Araip.B05	7161219	2	0	1	1	1	1	1	1	75% of 2	1	1	1	75% of 0	1	1	1
AX-147221644	Araip.B05	7373130	0	2	1	1	1	1	1	1	75% of 0	1	1	1	75% of 2	1	1	1
AX-147249099	Araip.B05	7687289	0	2	1	1	1	1	1	1	75% of 0	1	1	1	75% of 2	1	1	1
AX-147221661	Araip.B05	7849216	0	2	1	1	1	1	1	1	75% of 0	1	1	1	75% of 2	1	1	1
AX-147221690	Araip.B05	8413953	2	0	1	1	1	1	1	1	75% of 2	1	1	1	75% of 0	1	1	1
AX-147249129	Araip.B05	8588087	0	2	1	1	1	1	1	1	75% of 0	1	1	1	75% of 2	1	1	1
AX-147249140	Araip.B05	8975356	2	0	1	1	1	1	1	1	75% of 2	1	1	1	75% of 0	1	1	1
AX-147249144	Araip.B05	9073245	2	0	1	1	1	1	1	1	75% of 2	1	1	1	75% of 0	1	1	1
AX-147249149	Araip.B05	9285673	0	2	1	1	1	1	1	1	75% of 0	1	1	1	75% of 2	1	1	1
AX-147221728	Araip.B05	9380956	0	2	1	1	1	1	1	1	75% of 0	1	1	1	75% of 2	1	1	1
AX-147221744	Araip.B05	10026302	0	2	1	1	1	1	1	1	75% of 0	1	1	1	75% of 2	1	1	1
AX-147249198	Araip.B05	10899564	0	2	1	1	1	1	1	1	75% of 0	1	1	1	75% of 2	1	1	1
AX-147221764	Araip.B05	10904683	2	0	1	1	1	1	1	1	75% of 2	1	1	1	75% of 0	1	1	1
AX-147249250	Araip.B05	12177012	2	0	1	1	1	1	1	1	75% of 2	1	1	1	75% of 0	1	1	1
AX-147221815	Araip.B05	12183118	0	2	1	1	1	1	1	1	75% of 0	1	1	1	75% of 2	1	1	1
AX-147221822	Araip.B05	12457858	0	2	1	1	1	1	1	1	75% of 0	1	1	1	75% of 2	1	1	1
AX-147221834	Araip.B05	12731369	2	0	1	1	1	1	1	1	75% of 2	1	1	1	75% of 0	1	1	1
AX-147221851	Araip.B05	13135981	0	2	1	1	1	1	1	1	75% of 0	1	1	1	75% of 2	1	1	1
AX-147249346	Araip.B05	15195416	0	2	1	1	1	1	1	1	75% of 0	1	1	1	75% of 2	1	1	1
AX-147221947	Araip.B05	15568257	0	2	1	1	1	1	1	1	75% of 0	1	1	1	75% of 2	1	1	1
AX-147221971	Araip.B05	16088919	2	0	1	1	1	1	1	1	1	1	1	1	75% of 0	1	1	1
AX-147249415	Araip.B05	16779596	0	2	1	1	1	1	1	1	1	1	1	1	75% of 2	1	1	1
AX-147249419	Araip.B05	16814071	2	0	1	1	1	1	1	1	1	1	1	1	75% of 0	1	1	1
AX-147222142	Araip.B05	20296006	0	2	1	1	1	1	1	1	1	1	1	1	75% of 2	1	1	1
AX-147249670	Araip.B05	24364583	0	2	1	1	1	1	1	1	1	1	1	1	75% of 2	1	1	1
AX-147222245	Araip.B05	24572683	0	2	1	1	1	1	1	1	1	1	1	1	75% of 2	1	1	1
AX-147249681	Araip.B05	25238686	2	0	1	1	1	1	1	1	1	1	1	1	75% of 0	1	1	1
AX-147249687	Araip.B05	25429352	0	2	1	1	1	1	1	1	1	1	1	1	75% of 2	1	1	1
AX-147249723	Araip.B05	26447012	0	2	1	1	1	1	1	1	1	1	1	1	75% of 2	1	1	1
AX-147249821	Araip.B05	32115358	0	2	1	1	1	1	1	1	1	1	1	1	75% of 2	1	1	1
AX-147249827	Araip.B05	32289309	2	0	1	1	1	1	1	1	1	1	1	1	75% of 0	1	1	1
AX-147222421	Araip.B05	32289674	0	2	1	1	1	1	1	1	1	1	1	1	75% of 2	1	1	1
AX-176812693	Araip.B05	35345902	0	2	1	1	1	1	1	1	1	1	1	1	75% of 2	1	1	1
AX-147222444	Araip.B05	36018149	0	2	1	1	1	1	1	1	1	1	1	1	75% of 2	1	1	1
AX-147249856	Araip.B05	36019113	2	0	1	1	1	1	1	1	1	1	1	1	75% of 0	1	1	1
AX-176791611	Araip.B05	36272049	2	0	1	1	1	1	1	1	1	1	1	1	75% of 0	1	1	1
AX-147222500	Araip.B05	36293239	0	2	1	1	1	1	1	1	1	1	1	1	75% of 2	1	1	1
AX-147222478	Araip.B05	43415063	2	0	1	1	1	1	1	1	1	1	1	1	75% of 0	1	1	1
AX-147249898	Araip.B05	44898152	0	2	1	1	1	1	1	1	1	1	1	1	75% of 2	1	1	1
AX-147249925	Araip.B05	50650006	0	2	1	1	1	1	1	1	1	1	1	1	75% of 2	1	1	1
AX-147249952	Araip.B05	62586762	0	2	1	1	1	1	1	1	1	1	1	1	75% of 2	1	1	1
AX-147222631	Araip.B05	86452676	2	0	1	1	1	1	1	1	1	1	1	1	75% of 0	1	1	1
AX-147222640	Araip.B05	91047480	2	0	1	1	1	1	1	1	1	1	1	1	75% of 0	1	1	1
AX-147223754	Araip.B05	96295599	2	0	1	1	1	1	1	1	1	1	1	1	75% of 0	1	1	1
AX-147223733	Araip.B05	103446576	2	0	1	1	1	1	1	1	1	1	1	1	75% of 0	1	1	1
AX-147223675	Araip.B05	113649419	0	2	1	1	1	1	1	1	1	1	1	1	75% of 2	1	1	1
AX-147250167	Araip.B05	116226836	0	2	1	1	1	1	1	1	1	1	1	1	75% of 2	1	1	1
AX-147250188	Araip.B05	116885935	2	0	1	1	1	1	1	1	1	1	1	1	75% of 0	1	1	1
AX-147223626	Araip.B05	117237150	2	0	1	1	1	1	1	1	1	1	1	1	75% of 0	1	1	1
AX-147250205	Araip.B05	117696394	0	2	1	1	1	1	1	1	1	1	1	1	75% of 2	1	1	1
AX-147223567	Araip.B05	119922790	0	2	1	1	1	1	1	1	1	1	1	1	75% of 2	1	1	1
AX-147250353	Araip.B05	124718344	2	0	1	1	1	1	1	1	1	1	1	1	75% of 0	1	1	1
AX-147250373	Araip.B05	124967139	2	0	1	1	1	1	1	1	1	1	1	1	75% of 0	1	1	1
AX-147250418	Araip.B05	126949239	0	2	1	1	1	1	1	1	1	1	1	1	75% of 2	1	1	1
AX-147250449	Araip.B05	127501656	2	0	1	1	1	1	1	1	1	1	1	1	75% of 0	1	1	1
AX-147223379	Araip.B05	129141719	0	2	1	1	1	1	1	1	1	1	1	1	75% of 2	1	1	1
AX-147222657	Araip.B05	130005877	0	2	1	1	1	1	1	1	1	1	1	1	75% of 2	1	1	1
AX-147250531	Araip.B05	132426909	0	2	1	1	1	1	1	1	1	1	1	1	75% of 2	1	1	1
AX-147223263	Araip.B05	134780534	0	2	1	1	1	1	1	1	1	1	1	1	75% of 2	1	1	1
AX-147250640	Araip.B05	135932744	0	2	1	1	NoCall	1	1	1	1	1	1	1	75% of 2	1	1	1
AX-147250683	Araip.B05	137264012	0	2	1	1	1	1	1	1	1	1	1	1	75% of 2	1	1	1
AX-147250684	Araip.B05	137264205	0	2	1	1	1	1	1	1	1	1	1	1	75% of 2	1	1	1
AX-147223172	Araip.B05	137832935	2	0	1	1	1	1	1	1	1	1	1	1	75% of 0	1	1	1
AX-147250725	Araip.B05	138223448	0	2	1	1	1	1	1	1	1	1	1	1	75% of 2	1	1	1
AX-147223135	Araip.B05	138256845	0	2	1	1	1	1	1	1	1	1	1	1	75% of 2	1	1	1
AX-147223117	Araip.B05	138769282	0	2	1	1	1	1	1	1	1	1	1	1	75% of 2	1	1	1
AX-147250772	Araip.B05	139287354	2	0	1	1	1	1	1	1	1	1	1	1	75% of 0	1	1	1
AX-147250798	Araip.B05	139990135	2	0	1	1	1	1	1	1	1	1	1	1	75% of 0	1	1	1
AX-147250807	Araip.B05	140230510	2	0	1	1	1	1	1	1	1	1	1	1	75% of 0	1	1	1
AX-147250821	Araip.B05	140708277	0	2	1	1	1	1	1	1	1	1	1	1	75% of 2	1	1	1
AX-147222941	Araip.B05	141738121	0	2	1	1	1	1	1	1	1	1	1	1	75% of 2	1	1	1
AX-147222887	Araip.B05	142372310	2	0	1	1	1	1	1	1	1	1	1	1	75% of 0	1	1	1
AX-147250953	Araip.B05	142757147	0	2	1	1	1	1	1	1	1	1	1	1	75% of 2	1	1	1
AX-147222868	Araip.B05	142815162	2	0	1	1	1	1	1	1	1	1	1	1	75% of 0	1	1	1
AX-147251017	Araip.B05	143640931	0	2	1	1	1	1	1	1	1	1	1	1	75% of 2	1	1	1
AX-147222791	Araip.B05	143715044	2	0	1	1	1	1	1	1	1	1	1	1	75% of 0	1	1	1
AX-147251045	Araip.B05	143858735	0	2	1	1	1	1	1	1	1	1	1	1	75% of 2	1	1	1
AX-147222751	Araip.B05	144565826	0	2	1	1	1	1	1	1	1	1	1	1	75% of 2	1	1	1
AX-147222750	Araip.B05	144566028	0	2	1	1	1	1	1	1	1	1	1	1	75% of 2	1	1	1
AX-147222693	Araip.B05	145358753	2	0	1	1	1	1	1	1	1	1	1	1	75% of 0	1	1	1
AX-147251140	Araip.B05	145427649	0	2	1	1	1	1	1	1	1	1	1	1	75% of 2	1	1	1
AX-147223763	Araip.B05	145698740	0	2	1	1	1	1	1	1	1	1	1	1	75% of 2	1	1	1
AX-147223784	Araip.B05	146001486	2	0	1	1	1	1	1	1	1	1	1	1	75% of 0	1	1	1
AX-147223799	Araip.B05	146348069	0	2	1	1	1	1	1	1	1	1	1	1	75% of 2	1	1	1
AX-147251259	Araip.B05	147371907	0	2	1	1	1	1	1	1	1	1	1	1	75% of 2	1	1	1
AX-147223874	Araip.B05	147376205	2	0	1	1	1	1	1	1	1	1	1	1	75% of 0	1	1	1
AX-147251266	Araip.B05	147409221	2	0	1	1	1	1	1	1	1	1	1	1	75% of 0	1	1	1
AX-147223958	Araip.B05	148997085	0	2	1	1	1	1	1	1	1	1	1	1	75% of 2	1	1	1
AX-147254333	Araip.B07	686538	0	2	1	1	1	1	1	1	1	1	1	75% of 0	1	1	1	1
AX-147254340	Araip.B07	763999	2	0	1	1	1	1	1	1	1	1	1	75% of 2	1	1	1	1
AX-147254342	Araip.B07	807438	2	0	1	1	1	1	1	1	1	1	1	75% of 2	1	1	1	1
AX-147254362	Araip.B07	1029451	2	0	1	1	1	1	1	1	1	1	1	75% of 2	1	1	1	1
AX-147254382	Araip.B07	1263763	2	0	1	1	1	1	1	1	1	1	1	75% of 2	1	1	1	1
AX-147226975	Araip.B07	1299906	2	0	1	1	1	1	1	1	1	1	1	75% of 2	1	1	1	1
AX-147226982	Araip.B07	1372824	2	0	1	1	1	1	1	1	1	1	1	75% of 2	1	1	1	1
AX-147226985	Araip.B07	1394692	2	0	1	1	1	1	1	1	1	1	1	75% of 2	1	1	1	1
AX-147254450	Araip.B07	1924101	0	2	1	1	1	1	1	1	1	1	1	75% of 0	1	1	1	1
AX-147227036	Araip.B07	1980923	2	0	1	1	1	1	1	1	1	1	1	75% of 2	1	1	1	1
AX-147254479	Araip.B07	2069679	2	0	1	1	1	1	1	1	1	1	1	75% of 2	1	1	1	1
AX-147227068	Araip.B07	2072221	0	2	1	1	1	1	1	1	1	1	1	75% of 0	1	1	1	1
AX-147254480	Araip.B07	2077018	2	0	1	1	1	1	1	1	1	1	1	75% of 2	1	1	1	1

## Sheet: Table S3
Table S3. List of polymorphic markers between IpaCor4x_S0 and A. hypogaea parents demonstrating expected heterozygtoic calls among the F1 hybrids.
probeset_id	Chr_id	Start	13-1014	13-2113	IpaCor4x_S0:2	IpaCor4x_S0:5	IpaCor4x_S0:6	13-1014 x IpaCor4x_S0:2_F1:1	13-1014 x IpaCor4x_S0:2_F1:2	13-1014 x IpaCor4x_S0:2_F1:3	13-1014 x IpaCor4x_S0:2_F1:4	13-1014 x IpaCor4x_S0:2_F1:6	13-2113 x IpaCor4x_S0:2_F1:1	13-2113 x IpaCor4x_S0:2_F1:2	13-2113 x IpaCor4x_S0:2_F1:3	13-2113 x IpaCor4x_S0:2_F1:4	13-2113 x IpaCor4x_S0:2_F1:5	13-2113 x IpaCor4x_S0:2_F1:6	13-2113 x IpaCor4x_S0:2_F1:8	13-1014 x IpaCor4x_S0:5_F1:1	13-1014 x IpaCor4x_S0:5_F1:2	13-1014 x IpaCor4x_S0:5_F1:3	13-1014 x IpaCor4x_S0:5_F1:4	13-1014 x IpaCor4x_S0:5_F1:5	13-1014 x IpaCor4x_S0:5_F1:6	13-1014 x IpaCor4x_S0:5_F1:7	13-1014 x IpaCor4x_S0:5_F1:8	13-1014 x IpaCor4x_S0:5_F1:9	13-2113 x IpaCor4x_S0:5_F1:1	13-2113 x IpaCor4x_S0:5_F1:2	13-2113 x IpaCor4x_S0:5_F1:3	13-2113 x IpaCor4x_S0:5_F1:4	13-2113 x IpaCor4x_S0:5_F1:6	13-2113 x IpaCor4x_S0:5_F1:7	13-1014 x IpaCor4x_S0:6_F1:1	13-1014 x IpaCor4x_S0:6_F1:2	13-1014 x IpaCor4x_S0:6_F1:3	13-1014 x IpaCor4x_S0:6_F1:4	13-1014 x IpaCor4x_S0:6_F1:6	13-1014 x IpaCor4x_S0:6_F1:7	13-1014 x IpaCor4x_S0:6_F1:8	13-2113 x IpaCor4x_S0:6_F1:1	13-2113 x IpaCor4x_S0:6_F1:2	13-2113 x IpaCor4x_S0:6_F1:3
AX-147207654	Aradu.A01	1984932	2	2	0	0	0	1	1	1	1	1	1	1	1	1	1	1	1	1	1	1	1	1	1	1	1	1	1	1	1	1	1	1	1	1	1	1	1	1	1	1	1	1
AX-147207784	Aradu.A01	1016728	2	2	0	0	0	1	1	1	1	1	1	1	1	1	1	1	1	1	1	1	1	1	1	1	1	1	1	1	1	1	1	1	1	1	1	1	1	1	1	1	1	1
AX-147207860	Aradu.A01	1397540	0	0	2	2	2	1	1	1	1	1	1	1	1	1	1	1	1	1	1	1	1	1	1	1	1	1	1	1	1	1	1	1	1	1	1	1	1	1	1	1	1	1
AX-147208000	Aradu.A01	1874404	0	0	2	2	2	1	1	1	1	1	1	1	1	1	1	1	1	1	1	1	1	1	1	1	1	1	1	1	1	1	1	1	1	1	1	1	1	1	1	1	1	1
AX-147208042	Aradu.A01	3665567	0	0	2	2	2	1	1	1	1	1	1	1	1	1	1	1	1	1	1	1	1	1	1	1	1	1	1	1	1	1	1	1	1	1	1	1	1	1	1	1	1	1
AX-147208154	Aradu.A01	2799133	0	0	2	2	2	1	1	1	1	1	1	1	1	1	1	1	1	1	1	1	1	1	1	1	1	1	1	1	1	1	1	1	1	1	1	1	1	1	1	1	1	1
AX-147208214	Aradu.A01	3033014	0	0	2	2	2	1	1	1	1	1	1	1	1	1	1	1	1	1	1	1	1	1	1	1	1	1	1	1	1	1	1	1	1	1	1	1	1	1	1	1	1	1
AX-147208300	Aradu.A01	3807853	2	2	0	0	0	1	1	1	1	1	1	1	1	1	1	1	1	1	1	1	1	1	1	1	1	1	1	1	1	1	1	1	1	1	1	1	1	1	1	1	1	1
AX-147208422	Aradu.A01	5138416	0	0	2	2	2	1	1	1	1	1	1	1	1	1	1	1	1	1	1	1	1	1	1	1	1	1	1	1	1	1	1	1	1	1	1	1	1	1	1	1	1	1
AX-147208443	Aradu.A01	10515169	2	2	0	0	0	1	1	1	1	1	1	1	1	1	1	1	1	1	1	1	1	1	1	1	1	1	1	1	1	1	1	1	1	1	1	1	1	1	1	1	1	1
AX-147208728	Aradu.A01	11960034	2	2	0	0	0	1	1	1	1	1	1	1	1	1	1	1	1	1	1	1	1	1	1	1	1	1	1	1	1	1	1	1	1	1	1	1	1	1	1	1	1	1
AX-147208979	Aradu.A01	6679029	2	2	0	0	0	1	1	1	1	1	1	1	1	1	1	1	1	1	1	1	1	1	1	1	1	1	1	1	1	1	1	1	1	1	1	1	1	1	1	1	1	1
AX-147208994	Aradu.A01	6797918	0	0	2	2	2	1	1	1	1	1	1	1	1	1	1	1	1	1	1	1	1	1	1	1	1	1	1	1	1	1	1	1	1	1	1	1	1	1	1	1	1	1
AX-147209587	Aradu.A01	9780063	0	0	2	2	2	1	1	1	1	1	1	1	1	1	1	1	1	1	1	1	1	1	1	1	1	1	1	1	1	1	1	1	1	1	1	1	1	1	1	1	1	1
AX-147209596	Aradu.A01	9821068	0	0	2	2	2	1	1	1	1	1	1	1	1	1	1	1	1	1	1	1	1	1	1	1	1	1	1	1	1	1	1	1	1	1	1	1	1	1	1	1	1	1
AX-147209733	Aradu.A01	10354959	2	2	0	0	0	1	1	1	1	1	1	1	1	1	1	1	1	1	1	1	1	1	1	1	1	1	1	1	1	1	1	1	1	1	1	1	1	1	1	1	1	1
AX-147209800	Aradu.A01	12011660	2	2	0	0	0	1	1	1	1	1	1	1	1	1	1	1	1	1	1	1	1	1	1	1	1	1	1	1	1	1	1	1	1	1	1	1	1	1	1	1	1	1
AX-147209831	Aradu.A01	10646943	NoCall	0	2	2	2	1	1	1	1	1	1	1	1	1	1	1	1	1	1	1	1	1	1	1	1	1	1	1	1	1	1	1	1	1	1	1	1	1	1	1	1	1
AX-147209984	Aradu.A01	11630505	0	0	2	2	2	1	1	1	1	1	1	1	1	1	1	1	1	1	1	1	1	1	1	1	1	1	1	1	1	1	1	1	1	1	1	1	1	1	1	1	1	1
AX-147210053	Aradu.A01	37218769	2	2	0	0	0	1	1	1	1	1	1	1	1	1	1	1	1	1	1	1	1	1	1	1	1	1	1	1	1	1	1	1	1	1	1	1	1	1	1	1	1	1
AX-147210116	Aradu.A01	12608715	0	0	2	2	2	1	1	1	1	1	1	1	1	1	1	1	1	1	1	1	1	1	1	1	1	1	1	1	1	1	1	1	1	1	1	1	1	1	1	1	1	1
AX-147210122	Aradu.A01	12699876	0	0	2	2	2	1	1	1	1	1	1	1	1	1	1	1	1	1	1	1	1	1	1	1	1	1	1	1	1	1	1	1	1	1	1	1	1	1	1	1	1	1
AX-147210168	Aradu.A01	13838268	0	0	2	2	2	1	1	1	1	1	1	1	1	1	1	1	1	1	1	1	1	1	1	1	1	1	1	1	1	1	1	1	1	1	1	1	1	1	1	1	1	1
AX-147210407	Aradu.A03	12542971	2	2	0	0	0	1	1	1	1	1	1	1	1	1	1	1	1	1	1	1	1	1	1	1	1	1	1	1	1	1	1	1	1	1	1	1	1	1	1	1	1	1
AX-147210444	Aradu.A01	21319811	0	0	2	2	2	1	1	1	1	1	1	1	1	1	1	1	1	1	1	1	1	1	1	1	1	1	1	1	1	1	1	1	1	1	1	1	1	1	1	1	1	1
AX-147210494	Aradu.A01	40537578	2	2	0	0	0	1	1	1	1	1	1	1	1	1	1	1	1	1	1	1	1	1	1	1	1	1	1	1	1	1	1	1	1	1	1	1	1	1	1	1	1	1
AX-147210538	Aradu.A01	25725044	0	0	2	2	2	1	1	1	1	1	1	1	1	1	1	1	1	1	1	1	1	1	1	1	1	1	1	1	1	1	1	1	1	1	1	1	1	1	1	1	1	1
AX-147210916	Aradu.A01	65424740	2	2	0	0	0	1	1	1	1	1	1	1	1	1	1	1	1	1	1	1	1	1	1	1	1	1	1	1	1	1	1	1	1	1	1	1	1	1	1	1	1	1
AX-147210973	Aradu.A01	38141296	0	0	2	2	2	1	1	1	1	1	1	1	1	1	1	1	1	1	1	1	1	1	1	1	1	1	1	1	1	1	1	1	1	1	1	1	1	1	1	1	1	1
AX-147210990	Aradu.A01	93137070	2	2	0	0	0	1	1	1	1	1	1	1	1	1	1	1	1	1	1	1	1	1	1	1	1	1	1	1	1	1	1	1	1	1	1	1	1	1	1	1	1	1
AX-147211318	Aradu.A01	57495131	0	0	2	2	2	1	1	1	1	1	1	1	1	1	1	1	1	1	1	1	1	1	1	1	1	1	1	1	1	1	1	1	1	1	1	1	1	1	1	1	1	1
AX-147211461	Aradu.A01	94186188	2	2	0	0	0	1	1	1	1	1	1	1	1	1	1	1	1	1	1	1	1	1	1	1	1	1	1	1	1	1	1	1	1	1	1	1	1	1	1	1	1	1
AX-147211498	Aradu.A01	67880395	0	0	2	2	2	1	1	1	1	1	1	1	1	1	1	1	1	1	1	1	1	1	1	1	1	1	1	1	1	1	1	1	1	1	1	1	1	1	1	1	1	1
AX-147211745	Aradu.A01	96586740	2	2	0	0	0	1	1	1	1	1	1	1	1	1	1	1	1	1	1	1	1	1	1	1	1	1	1	1	1	1	1	1	1	1	1	1	1	1	1	1	1	1
AX-147211780	Aradu.A01	102619570	2	2	0	0	0	1	1	1	1	1	1	1	1	1	1	1	1	1	1	1	1	1	1	1	1	1	1	1	1	1	1	1	1	1	1	1	1	1	1	1	1	1
AX-147211820	Aradu.A01	96059354	0	0	2	2	2	1	1	1	1	1	1	1	1	1	1	1	1	1	1	1	1	1	1	1	1	1	1	1	1	1	1	1	1	1	1	1	1	1	1	1	1	1
AX-147211834	Aradu.A01	104459918	2	2	0	0	0	1	1	1	1	1	1	1	1	1	1	1	1	1	1	1	1	1	1	1	1	1	1	1	1	1	1	1	1	1	1	1	1	1	1	1	1	1
AX-147211859	Aradu.A01	97202546	0	0	2	2	2	1	1	1	1	1	1	1	1	1	1	1	1	1	1	1	1	1	1	1	1	1	1	1	1	1	1	1	1	1	1	1	1	1	1	1	1	1
AX-147211898	Aradu.A01	99392639	0	0	2	2	2	1	1	1	1	1	1	1	1	1	1	1	1	1	1	1	1	1	1	1	1	1	1	1	1	1	1	1	1	1	1	1	1	1	1	1	1	1
AX-147211966	Aradu.A01	101345608	2	2	0	0	0	1	1	1	1	1	1	1	1	1	1	1	1	1	1	1	1	1	1	1	1	1	1	1	1	1	1	1	1	1	1	1	1	1	1	1	1	1
AX-147212001	Aradu.A01	105335186	2	2	0	0	0	1	1	1	1	1	1	1	1	1	1	1	1	1	1	1	1	1	1	1	1	1	1	1	1	1	1	1	1	1	1	1	1	1	1	1	1	1
AX-147212046	Aradu.A02	550659	2	2	0	0	0	1	1	1	1	1	1	1	1	1	1	1	1	1	1	1	1	1	1	1	1	1	1	1	1	1	1	1	1	1	1	1	1	1	1	1	1	1
AX-147212098	Aradu.A02	28959	0	0	2	2	2	1	1	1	1	1	1	1	1	1	1	1	1	1	1	1	1	1	1	1	1	1	1	1	1	1	1	1	1	1	1	1	1	1	1	1	1	1
AX-147212099	Aradu.A02	29242	0	0	2	2	2	1	1	1	1	1	1	1	1	1	1	1	1	1	1	1	1	1	1	1	1	1	1	1	1	1	1	1	1	1	1	1	1	1	1	1	1	1
AX-147212116	Aradu.A02	111064	0	0	2	2	2	1	1	1	1	1	1	1	1	1	1	1	1	1	1	1	1	1	1	1	1	1	1	1	1	1	1	1	1	1	1	1	1	1	1	1	1	1
AX-147212218	Aradu.A02	527457	0	0	2	2	2	1	1	1	1	1	1	1	1	1	1	1	1	1	1	1	1	1	1	1	1	1	1	1	1	1	1	1	1	1	1	1	1	1	1	1	1	1
AX-147212230	Aradu.A02	1371331	2	2	0	0	0	1	1	1	1	1	1	1	1	1	1	1	1	1	1	1	1	1	1	1	1	1	1	1	1	1	1	1	1	1	1	1	1	1	1	1	1	1
AX-147212284	Aradu.A02	743821	0	0	2	2	2	1	1	1	1	1	1	1	1	1	1	1	1	1	1	1	1	1	1	1	1	1	1	1	1	1	1	1	1	1	1	1	1	1	1	1	1	1
AX-147212293	Araip.B02	1813148	2	2	0	0	0	1	1	1	1	1	1	1	1	1	1	1	1	1	1	1	1	1	1	1	1	1	1	1	1	1	1	1	1	1	1	1	1	1	1	1	1	1
AX-147212317	Aradu.A02	802080	0	0	2	2	2	1	1	1	1	1	1	1	1	1	1	1	1	1	1	1	1	1	1	1	1	1	1	1	1	1	1	1	1	1	1	1	1	1	1	1	1	1
AX-147212376	Aradu.A02	1103783	0	0	2	2	2	1	1	1	1	1	1	1	1	1	1	1	1	1	1	1	1	1	1	1	1	1	1	1	1	1	1	1	1	1	1	1	1	1	1	1	1	1
AX-147212377	Aradu.A02	1103834	0	0	2	2	2	1	1	1	1	1	1	1	1	1	1	1	1	1	1	1	1	1	1	1	1	1	1	1	1	1	1	1	1	1	1	1	1	1	1	1	1	1
AX-147212437	Aradu.A02	1239343	0	0	2	2	2	1	1	1	1	1	1	1	1	1	1	1	1	1	1	1	1	1	1	1	1	1	1	1	1	1	1	1	1	1	1	1	1	NoCall	1	1	1	1
AX-147212474	Aradu.A02	2658894	2	2	0	0	0	1	1	1	1	1	1	1	1	1	1	1	1	1	1	1	1	1	1	1	1	1	1	1	1	1	1	1	1	1	1	1	1	1	1	1	1	1
AX-147212498	Aradu.A02	1484958	0	0	2	2	2	1	1	1	1	1	1	1	1	1	1	1	1	1	1	1	1	1	1	1	1	1	1	1	1	1	1	1	1	1	1	1	1	1	1	1	1	1
AX-147212646	Aradu.A02	2907720	2	2	0	0	0	1	1	1	1	1	1	1	1	1	1	1	1	1	1	1	1	1	1	1	1	1	1	1	1	1	1	1	1	1	1	1	1	1	1	1	1	1
AX-147212647	Aradu.A02	2485026	0	0	2	2	2	1	1	1	1	1	1	1	1	1	1	1	1	1	1	1	1	1	1	1	1	1	1	1	1	1	1	1	1	1	1	1	1	1	1	1	1	1
AX-147212654	Aradu.A10	108963447	2	2	0	0	0	1	1	1	1	1	1	1	1	1	1	1	1	1	1	1	1	1	1	1	1	1	1	1	1	1	1	1	1	1	1	1	1	1	1	1	1	1
AX-147212684	Aradu.A02	2621335	0	0	2	2	2	1	1	1	1	1	1	1	1	1	1	1	1	1	1	1	1	1	1	1	1	1	1	1	1	1	1	1	1	1	1	1	1	1	1	1	1	1
AX-147212710	Aradu.A02	5592856	2	2	0	0	0	1	1	1	1	1	1	1	1	1	1	1	1	1	1	1	1	1	1	1	1	1	1	1	1	1	1	1	1	1	1	1	1	1	1	1	1	1
AX-147212881	Araip.B02	5222942	2	2	0	0	0	1	1	1	1	1	1	1	1	1	1	1	1	1	1	1	1	1	1	1	1	1	1	1	1	1	1	1	1	1	1	1	1	1	1	1	1	1
AX-147212902	Aradu.A02	4341479	0	0	2	2	2	1	1	1	1	1	1	1	1	1	1	1	1	1	1	1	1	1	1	1	1	1	1	1	1	1	1	1	1	1	1	1	1	1	1	1	1	1
AX-147212993	Aradu.A02	5420407	0	0	2	2	2	1	1	1	1	1	1	1	1	1	1	1	1	1	1	1	1	1	1	1	1	1	1	1	1	1	1	1	1	1	1	1	1	1	1	1	1	1
AX-147212997	Aradu.A02	5454317	2	2	0	0	0	1	1	1	1	1	1	1	1	1	1	1	1	1	1	1	1	1	1	1	1	1	1	1	1	1	1	1	1	1	1	1	1	1	1	1	1	1
AX-147213023	Aradu.A02	73484643	2	2	0	0	0	1	1	1	1	1	1	1	1	1	1	1	1	1	1	1	1	1	1	1	1	1	1	1	1	1	1	1	1	1	1	1	1	1	1	1	1	1
AX-147213077	Aradu.A02	79292463	2	2	0	0	0	1	1	1	1	1	1	1	1	1	1	1	1	1	1	1	1	1	1	1	1	1	1	1	1	1	1	1	1	1	1	1	1	1	1	1	1	1
AX-147213222	Aradu.A02	8096404	0	0	2	2	2	1	1	1	1	1	1	1	1	1	1	1	1	1	1	1	1	1	1	1	1	1	1	1	1	1	1	1	1	1	1	1	1	1	1	1	1	1
AX-147213298	Aradu.A02	8904566	0	0	2	2	2	1	1	1	1	1	1	1	1	1	1	1	1	1	1	1	1	1	1	1	1	1	1	1	1	1	1	1	1	1	1	1	1	1	1	1	1	1
AX-147213442	Aradu.A02	13644317	2	2	0	0	0	1	1	1	1	1	1	1	1	1	1	1	1	1	1	1	1	1	1	1	1	1	1	1	1	1	1	1	1	1	1	1	1	1	1	1	1	1
AX-147213474	Aradu.A02	14941453	0	0	2	2	2	1	1	1	1	1	1	1	1	1	1	1	1	1	1	1	1	1	1	1	1	1	1	1	1	1	1	1	1	1	1	1	1	1	1	1	1	1
AX-147213581	Aradu.A02	23583857	0	0	2	2	2	1	1	1	1	1	1	1	1	1	1	1	1	1	1	1	1	1	1	1	1	1	1	1	1	1	1	1	1	1	1	1	1	1	1	1	1	1
AX-147213596	Aradu.A02	24494229	0	0	2	2	2	1	1	1	1	1	1	1	1	1	1	1	1	1	1	1	1	1	1	1	1	1	1	1	1	1	1	1	1	1	1	1	1	1	1	1	1	1
AX-147213731	Aradu.A02	42657216	0	0	2	2	2	1	1	1	1	1	1	1	1	1	1	1	1	1	1	1	1	1	1	1	1	1	1	1	1	1	1	1	1	1	1	1	1	1	1	1	1	1
AX-147213808	Aradu.A02	54438707	0	0	2	2	2	1	1	1	1	1	1	1	1	1	1	1	1	1	1	1	1	1	1	1	1	1	1	1	1	1	1	1	1	1	1	1	1	1	1	1	1	1
AX-147213903	Aradu.A02	61828549	0	0	2	2	2	1	1	1	1	1	1	1	1	1	1	1	1	1	1	1	1	1	1	1	1	1	1	1	1	1	1	1	1	1	1	1	1	1	1	1	1	1
AX-147214020	Aradu.A02	68529421	0	0	2	2	2	1	1	1	1	1	1	1	1	1	1	1	1	1	1	1	1	1	1	1	1	1	1	1	1	1	1	1	1	1	1	1	1	1	1	1	1	1
AX-147214132	Aradu.A02	81019130	2	2	0	0	0	1	1	1	1	1	1	1	1	1	1	1	1	1	1	1	1	1	1	1	1	1	1	1	1	1	1	1	1	1	1	1	1	1	1	1	1	1
AX-147214198	Aradu.A02	76208007	0	0	2	2	2	1	1	1	1	1	1	1	1	1	1	1	1	1	1	1	1	1	1	1	1	1	1	1	1	1	1	1	1	1	1	1	1	1	1	1	1	1
AX-147214203	Aradu.A02	76437470	0	0	2	2	2	1	1	1	1	1	1	1	1	1	1	1	1	1	1	1	1	1	1	1	1	1	1	1	1	1	1	1	1	1	1	1	1	1	1	1	1	1
AX-147214253	Aradu.A02	78670366	0	0	2	2	2	1	1	1	1	1	1	1	1	1	1	1	1	1	1	1	1	1	1	1	1	1	1	1	1	1	1	1	1	1	1	1	1	1	1	1	1	1
AX-147214321	Aradu.A02	85847747	2	2	0	0	0	1	1	1	1	1	1	1	1	1	1	1	1	1	1	1	1	1	1	1	1	1	1	1	1	1	1	1	1	1	1	1	1	1	1	1	1	1
AX-147214394	Aradu.A02	80148521	0	0	2	2	2	1	1	1	1	1	1	1	1	1	1	1	1	1	1	1	1	1	1	1	1	1	1	1	1	1	1	1	1	1	1	1	1	1	1	1	1	1
AX-147214409	Aradu.A02	80390421	0	0	2	2	2	1	1	1	1	1	1	1	1	1	1	1	1	1	1	1	1	1	1	1	1	1	1	1	1	1	1	1	1	1	1	1	1	1	1	1	1	1
AX-147214463	Aradu.A03	1876221	2	2	0	0	0	1	1	1	1	1	1	1	1	1	1	1	1	1	1	1	1	1	1	1	1	1	NoCall	1	1	1	1	1	1	1	1	1	1	1	1	1	1	1
AX-147214660	Aradu.A02	83417861	2	2	0	0	0	1	1	1	1	1	1	1	1	1	1	1	1	1	1	1	1	1	1	1	1	1	1	1	1	1	1	1	1	1	1	1	1	1	1	1	1	1
AX-147214692	Aradu.A02	83948421	0	0	2	2	2	1	1	1	1	1	1	1	1	1	1	1	1	1	1	1	1	1	1	1	1	1	1	1	1	1	1	1	1	1	1	1	1	1	1	1	1	1
AX-147214841	Aradu.A03	2402278	2	2	0	0	0	1	1	1	1	1	1	1	1	1	1	1	1	1	1	1	1	1	1	1	1	1	1	1	1	1	1	1	1	1	1	1	1	1	1	1	1	1
AX-147214948	Aradu.A02	87677898	0	0	2	2	2	1	1	1	1	1	1	1	1	1	1	1	1	1	1	1	1	1	1	1	1	1	1	1	1	1	1	1	1	1	1	1	1	1	1	1	1	1
AX-147215061	Aradu.A02	90046286	0	0	2	2	2	1	1	1	1	1	1	1	1	1	1	1	1	1	1	1	1	1	1	1	1	1	1	1	1	1	1	1	1	1	1	1	1	1	1	1	1	1
AX-147215228	Aradu.A01	280183	2	2	0	0	0	1	1	1	1	1	1	1	1	1	1	1	1	1	1	1	1	1	1	1	1	1	1	1	1	1	1	1	1	1	1	1	1	1	1	1	1	1
AX-147215260	Aradu.A03	133468507	2	2	0	0	0	1	1	1	1	1	1	1	1	1	1	1	1	1	1	1	1	1	1	1	1	1	1	1	1	1	1	1	1	1	1	1	1	1	1	1	1	1
AX-147215347	Aradu.A03	1091333	0	0	2	2	2	1	1	1	1	1	1	1	1	1	1	1	1	1	1	1	1	1	1	1	1	1	1	1	1	1	1	1	1	1	1	1	1	1	1	1	1	1
AX-147215461	Aradu.A03	6057773	2	2	0	0	0	1	1	1	1	1	1	1	1	1	1	1	1	1	1	1	1	1	1	1	1	1	1	1	1	1	1	1	1	1	1	1	1	1	1	1	1	1
AX-147215524	Aradu.A03	3171382	2	2	0	0	0	1	1	1	1	1	1	1	1	1	1	1	1	1	1	1	1	1	1	1	1	1	1	1	1	1	1	1	1	1	1	1	1	1	1	1	1	1
AX-147215589	Aradu.A03	8456921	2	2	0	0	0	1	1	1	1	1	1	1	1	1	1	1	1	1	1	1	1	1	1	1	1	1	1	1	1	1	1	1	1	1	1	1	1	1	1	1	1	1
AX-147215687	Aradu.A03	12075521	2	NoCall	0	0	0	1	1	1	1	1	1	1	1	1	1	1	1	1	1	1	1	1	1	1	1	1	1	1	1	1	1	1	1	1	1	1	1	1	1	1	1	1
AX-147215707	Aradu.A03	6417281	2	2	0	0	0	1	1	1	1	1	1	1	1	1	1	1	1	1	1	1	1	1	1	1	1	1	1	1	1	1	1	1	1	1	1	1	1	1	1	1	1	1
AX-147215718	Aradu.A03	6489276	0	0	2	2	2	1	1	1	1	1	1	1	1	1	1	1	1	1	1	1	1	1	1	1	1	1	1	1	1	1	1	1	1	1	1	1	1	1	1	1	1	1
AX-147215734	Aradu.A03	6692108	0	0	2	2	2	1	1	1	1	1	1	1	1	1	1	1	1	1	1	1	1	1	1	1	1	1	1	1	1	1	1	1	1	1	1	1	1	1	1	1	1	1
AX-147215772	Aradu.A03	7379372	0	0	2	2	2	1	1	1	1	1	1	1	1	1	1	1	1	1	1	1	1	1	1	1	1	1	1	1	1	1	1	1	1	1	1	1	1	1	1	1	1	1
AX-147215796	Aradu.A10	103035644	2	2	0	0	0	1	1	1	1	1	1	1	1	1	1	1	1	1	1	1	1	1	1	1	1	1	1	1	1	1	1	1	1	1	1	1	1	1	1	1	1	1
AX-147215826	Aradu.A03	28297502	2	2	0	0	0	1	1	1	1	1	1	1	1	1	1	1	1	1	1	1	1	1	1	1	1	1	1	1	1	1	1	1	1	1	1	1	1	1	1	1	1	1
AX-147215866	Aradu.A03	8985111	0	0	2	2	2	1	1	1	1	1	1	1	1	1	1	1	1	1	1	1	1	1	1	1	1	1	1	1	1	1	1	1	1	1	1	1	1	1	1	1	1	1
AX-147216004	Aradu.A03	34587359	2	2	0	0	0	1	1	1	1	1	1	1	1	1	1	1	1	1	1	1	1	1	1	1	1	1	1	1	1	1	1	1	1	1	1	1	1	1	1	1	1	1
AX-147216024	Aradu.A03	12343500	0	0	2	2	2	1	1	1	1	1	1	1	1	1	1	1	1	1	1	1	1	1	1	1	1	1	1	1	1	1	1	1	1	1	1	1	1	1	1	1	1	1
AX-147216068	Aradu.A03	13533799	0	0	2	2	2	1	1	1	1	1	1	1	1	1	1	1	1	1	1	1	1	1	1	1	1	1	1	1	1	1	1	1	1	1	1	1	1	1	1	1	1	1
AX-147216196	Aradu.A03	17895005	0	0	2	2	2	1	1	1	1	1	1	1	1	1	1	1	1	1	1	1	1	1	1	1	1	1	1	1	1	1	1	1	1	1	1	1	1	1	1	1	1	1
AX-147216454	Aradu.A03	25968000	0	0	2	2	2	1	1	1	1	1	1	1	1	1	1	1	1	1	1	1	1	1	1	1	1	1	1	1	1	1	1	1	1	1	1	1	1	1	1	1	1	1
AX-147216486	Aradu.A03	27018683	0	0	2	2	2	1	1	1	1	1	1	1	1	1	1	1	1	1	1	1	1	1	1	1	1	1	1	1	1	1	1	1	1	1	1	1	1	1	1	1	1	1
AX-147216502	Aradu.A03	27608767	0	0	2	2	2	1	1	1	1	1	1	1	1	1	1	1	1	1	1	1	1	1	1	1	1	1	1	1	1	1	1	1	1	1	1	1	1	1	1	1	1	1
AX-147216503	Aradu.A03	27634141	0	0	2	2	2	1	1	1	1	1	1	1	1	1	1	1	1	1	1	1	1	1	1	1	1	1	1	1	1	1	1	1	1	1	1	1	1	1	1	1	1	1
AX-147216523	Aradu.A03	39272913	2	2	0	0	0	1	1	1	1	1	1	1	1	1	1	1	1	1	1	1	1	1	1	1	1	1	1	1	1	1	1	1	1	1	1	1	1	1	1	1	1	1
AX-147216576	Aradu.A03	29801611	0	0	2	2	2	1	1	1	1	1	1	1	1	1	1	1	1	1	1	1	1	1	1	1	1	1	1	1	1	1	1	1	1	1	1	1	1	1	1	1	1	1
AX-147216619	Aradu.A03	31618317	0	1	2	2	2	1	1	1	1	1	1	1	1	1	1	1	1	1	1	1	1	1	1	1	1	1	1	1	1	1	1	1	1	1	1	1	1	1	1	1	1	1
AX-147216679	Aradu.A03	81083258	2	2	0	0	0	1	1	1	1	1	1	1	1	1	1	1	1	1	1	1	1	1	1	1	1	1	1	1	1	1	1	1	1	1	1	1	1	1	1	1	1	1
AX-147216750	Aradu.A03	108968618	2	2	0	0	0	1	1	1	1	1	1	1	1	1	1	1	1	1	1	1	1	1	1	1	1	1	1	1	1	1	1	1	1	1	1	1	1	1	1	1	1	1
AX-147216762	Aradu.A03	39554907	0	0	2	2	2	1	1	1	1	1	1	1	1	1	1	1	1	1	1	1	1	1	1	1	1	1	1	1	1	1	1	1	1	1	1	1	1	1	1	1	1	1
AX-147216827	Aradu.A03	128850942	2	2	0	0	0	1	1	1	1	1	1	1	1	1	1	1	1	1	1	1	1	1	1	1	1	1	1	1	1	1	1	1	1	1	1	1	1	1	1	1	1	1
AX-147216846	Aradu.A03	40143351	0	0	2	2	2	1	1	1	1	1	1	1	1	1	1	1	1	1	1	1	1	1	1	1	1	1	1	1	1	1	1	1	1	1	1	1	1	1	1	1	1	1
AX-147217086	Aradu.A03	114620989	2	2	0	0	0	1	1	1	1	1	1	1	1	1	1	1	1	1	1	1	1	1	1	1	1	1	1	1	1	1	1	1	1	1	1	1	1	1	1	1	1	1
AX-147217097	Aradu.A03	82848284	0	0	2	2	2	1	1	1	1	1	1	1	1	1	1	1	1	1	1	1	1	1	1	1	1	1	1	1	1	1	1	1	1	1	1	1	1	1	1	1	1	1
AX-147217130	Aradu.A03	91149324	0	0	2	2	2	1	1	1	1	1	1	1	1	1	1	1	1	1	1	1	1	1	1	1	1	1	1	1	1	1	1	1	1	1	1	1	1	1	1	1	1	1
AX-147217313	Aradu.A03	114695973	2	2	0	0	0	1	1	1	1	1	1	1	1	1	1	1	1	1	1	1	1	1	1	1	1	1	1	1	1	1	1	1	1	1	1	1	1	1	1	1	1	1
AX-147217460	Aradu.A03	124822441	2	2	0	0	0	1	1	1	1	1	1	1	1	1	1	1	1	1	1	1	1	1	1	1	1	1	1	1	1	1	1	1	1	1	1	1	1	1	1	1	1	1
AX-147217466	Aradu.A03	127594166	2	2	0	0	0	1	1	1	1	1	1	1	1	1	1	1	1	1	1	1	1	1	1	1	1	1	1	1	1	1	1	1	1	1	1	1	1	1	1	1	1	1
AX-147217655	Aradu.A03	119131960	0	NoCall	2	2	2	1	1	1	1	1	1	1	1	1	1	1	1	1	1	1	1	1	1	1	1	1	1	1	1	1	1	1	1	1	1	1	1	1	1	1	1	1
AX-147217722	Aradu.A03	120246950	0	0	2	2	2	1	1	1	1	1	1	1	1	1	1	1	1	1	1	1	1	1	1	1	1	1	1	1	1	1	1	1	1	1	1	1	1	1	1	1	1	1
AX-147217781	Aradu.A03	122133008	0	0	2	2	2	1	1	1	1	1	1	1	1	1	1	1	1	1	1	1	1	1	1	1	1	1	1	1	1	1	1	1	1	1	1	1	1	1	1	1	1	1
AX-147217841	Aradu.A03	123316868	0	0	2	2	2	1	1	1	1	1	1	1	1	1	1	1	1	1	1	1	1	1	1	1	1	1	1	1	1	1	1	1	1	1	1	1	1	1	1	1	1	1
AX-147217863	Aradu.A03	123768907	0	0	2	2	2	1	1	1	1	1	1	1	1	1	1	1	1	1	1	1	1	1	1	1	1	1	1	1	1	1	1	1	1	1	1	1	1	1	1	1	1	1
AX-147217884	Aradu.A03	124258677	2	2	0	0	0	1	1	1	1	1	1	1	1	1	1	1	1	1	1	1	1	1	1	1	1	1	1	1	1	1	1	1	1	1	1	1	1	1	1	1	1	1
AX-147218214	Aradu.A03	130214050	2	2	0	0	0	1	1	1	1	1	1	1	1	1	1	1	1	1	1	1	1	1	1	1	1	1	1	1	1	1	1	1	1	1	1	1	1	1	1	1	1	1
AX-147218312	Aradu.A04	20886535	2	2	0	0	0	1	1	1	1	1	1	1	1	1	1	1	1	1	1	1	1	1	1	1	1	1	1	1	1	1	1	1	1	1	1	1	1	1	1	1	1	1
AX-147218346	Aradu.A03	130197098	0	0	2	2	2	1	1	1	1	1	1	1	1	1	1	1	1	1	1	1	1	1	1	1	1	1	1	1	1	1	1	1	1	1	1	1	1	1	1	1	1	1
AX-147218364	Aradu.A03	130376382	0	0	2	2	2	1	1	1	1	1	1	1	1	1	1	1	1	1	1	1	1	1	1	1	1	1	1	1	1	1	1	1	1	1	1	1	1	1	1	1	1	1
AX-147218374	Aradu.A03	130552678	0	0	2	2	2	1	1	1	1	1	1	1	1	1	1	1	1	1	1	1	1	1	1	1	1	1	1	1	1	1	1	1	1	1	1	1	1	1	1	1	1	1
AX-147218388	Aradu.A03	130702919	0	1	2	2	2	1	1	1	1	1	1	1	1	1	1	1	1	1	1	1	1	1	1	1	1	1	1	1	1	1	1	1	1	1	1	1	1	1	1	1	1	1
AX-147218407	Aradu.A03	131990973	2	1	0	0	0	1	1	1	1	1	1	1	1	1	1	1	1	1	1	1	1	1	1	1	1	1	1	1	1	1	1	1	1	1	1	1	1	1	1	1	1	1
AX-147218411	Aradu.A03	131003503	0	0	2	2	2	1	1	1	1	1	1	1	1	1	1	1	1	1	1	1	1	1	1	1	1	1	1	1	1	1	1	1	1	1	1	1	1	1	1	1	1	1
AX-147218412	Aradu.A03	131993709	2	2	0	0	0	1	1	1	1	1	1	1	1	1	1	1	1	1	1	1	1	1	1	1	1	1	1	1	1	1	1	1	1	1	1	1	1	1	1	1	1	1
AX-147218493	Aradu.A03	134343833	2	2	0	0	0	1	1	1	1	1	1	1	1	1	1	1	1	1	1	1	1	1	1	1	1	1	1	1	1	1	1	1	1	1	1	1	1	1	1	1	1	1
AX-147218573	Aradu.A03	133036418	0	0	2	2	2	1	1	1	1	1	1	1	1	1	1	1	1	1	1	1	1	1	1	1	1	1	1	1	1	1	1	1	1	1	1	1	1	1	1	1	1	1
AX-147218696	Aradu.A03	134170720	0	0	2	2	2	1	1	1	1	1	1	1	1	1	1	1	1	1	1	1	1	1	1	1	1	1	1	1	1	1	1	1	1	1	1	1	1	1	1	1	1	1
AX-147218706	Aradu.A03	134513642	2	2	0	0	0	1	1	1	1	1	1	1	1	1	1	1	1	1	1	1	1	1	1	1	1	1	1	1	1	1	1	1	1	1	1	1	1	1	1	1	1	1
AX-147218713	Aradu.A04	237303	2	2	0	0	0	1	1	1	1	1	1	1	1	1	1	1	1	1	1	1	1	1	1	1	1	1	1	1	1	1	1	1	1	1	1	1	1	1	1	1	1	1
AX-147218726	Aradu.A04	4320760	2	2	0	0	0	1	1	1	1	1	1	1	1	1	1	1	1	1	1	1	1	1	1	1	1	1	1	1	1	1	1	1	1	1	1	1	1	1	1	1	1	1
AX-147218740	Aradu.A03	134755656	0	0	2	2	2	1	1	1	1	1	1	1	1	1	1	1	1	1	1	1	1	1	1	1	1	1	1	1	1	1	1	1	1	1	1	1	1	1	1	1	1	1
AX-147218928	Aradu.A04	1529307	0	0	2	2	2	1	1	1	1	1	1	1	1	1	1	1	1	1	1	1	1	1	1	1	1	1	1	1	1	1	1	1	1	1	1	1	1	1	1	1	1	1
AX-147218941	Aradu.A04	1705380	0	0	2	2	2	1	1	1	1	1	1	1	1	1	1	1	1	1	1	1	1	1	1	1	1	1	1	1	1	1	1	1	1	1	1	1	1	1	1	1	1	1
AX-147219042	Araip.B09	137987524	2	2	0	0	0	1	1	1	1	1	1	1	1	1	1	1	1	1	1	1	1	1	1	1	1	1	1	1	1	1	1	1	1	1	1	1	1	1	1	1	1	1
AX-147219073	Aradu.A04	2992007	0	0	2	2	2	1	1	1	1	1	1	1	1	1	1	1	1	1	1	1	1	1	1	1	1	1	1	1	1	1	1	1	1	1	1	1	1	1	1	1	1	1
AX-147219202	Aradu.A04	4809210	0	0	2	2	2	1	1	1	1	1	1	1	1	1	1	1	1	1	1	1	1	1	1	1	1	1	1	1	1	1	1	1	1	1	1	1	1	1	1	1	1	1
AX-147219236	Aradu.A04	5691843	0	NoCall	2	2	2	1	1	1	1	1	1	1	1	1	1	1	1	1	1	1	1	1	1	1	1	1	1	1	1	1	1	1	1	1	1	1	1	1	1	1	1	1
AX-147219386	Aradu.A04	9091455	0	0	2	2	2	1	1	1	1	1	1	1	1	1	1	1	1	1	1	1	1	1	1	1	1	1	1	1	1	1	1	1	1	1	1	1	1	1	1	1	1	1
AX-147219534	Aradu.A04	13742929	0	NoCall	2	2	2	1	1	1	1	1	1	1	1	1	1	1	1	1	1	1	1	1	1	1	1	1	1	1	1	1	1	1	1	1	1	1	1	1	1	1	1	1
AX-147219608	Aradu.A04	16978691	0	NoCall	2	2	2	1	1	1	1	1	1	1	1	1	1	1	1	1	1	1	1	1	1	1	1	1	1	1	1	1	1	1	1	1	1	1	1	1	1	1	1	1
AX-147220117	Aradu.A04	72193822	0	0	2	2	2	1	1	1	1	1	1	1	1	1	1	1	1	1	1	1	1	1	1	1	1	1	1	1	1	1	1	1	1	1	1	1	1	1	1	1	1	1
AX-147220157	Aradu.A04	118840533	2	2	0	0	0	1	1	1	1	1	1	1	1	1	1	1	1	1	1	1	1	1	1	1	1	1	1	1	1	1	1	1	1	1	1	1	1	1	1	1	1	1
AX-147220276	Aradu.A04	88049958	0	0	2	2	2	1	1	1	1	1	1	1	1	1	1	1	1	1	1	1	1	1	1	1	1	1	1	1	1	1	1	1	1	1	1	1	1	1	1	1	1	1
AX-147220321	Aradu.A04	92269838	0	0	2	2	2	1	1	1	1	1	1	1	1	1	1	1	1	1	1	1	1	1	1	1	1	1	1	1	1	1	1	1	1	1	1	1	1	1	1	1	1	1
AX-147220920	Aradu.A04	115602298	0	0	2	2	2	1	1	1	1	1	1	1	1	1	1	1	1	1	1	1	1	1	1	1	1	1	1	1	1	1	1	1	1	1	1	1	1	1	1	1	1	1
AX-147221042	Aradu.A04	117881066	0	0	2	2	2	1	1	1	1	1	1	1	1	1	1	1	1	1	1	1	1	1	1	1	1	1	1	1	1	1	1	1	1	1	1	1	1	1	1	1	1	1
AX-147221043	Aradu.A04	117881135	0	0	2	2	2	1	1	1	1	1	1	1	1	1	1	1	1	1	1	1	1	1	1	1	1	1	1	1	1	1	1	1	1	1	1	1	1	1	1	1	1	1
AX-147221111	Aradu.A04	120929339	2	2	0	0	0	1	1	1	1	1	1	1	1	1	1	1	1	1	1	1	1	1	1	1	1	1	1	1	1	1	1	1	1	1	1	1	1	1	1	1	1	1
AX-147221251	Aradu.A04	120330511	2	2	0	0	0	1	1	1	1	1	1	1	1	1	1	1	1	1	1	1	1	1	1	1	1	1	1	1	1	1	1	1	1	1	1	1	1	1	1	1	1	1
AX-147221291	Aradu.A10	101233597	2	2	0	0	0	1	1	1	1	1	1	1	1	1	1	1	1	1	1	1	1	1	1	1	1	1	1	1	1	1	1	1	1	1	1	1	1	1	1	1	1	1
AX-147221296	Aradu.A04	120888056	0	0	2	2	2	1	1	1	1	1	1	1	1	1	1	1	1	1	1	1	1	1	1	1	1	1	1	1	1	1	1	1	1	1	1	1	1	1	1	1	1	1
AX-147221301	Aradu.A04	121229546	2	2	0	0	0	1	1	1	1	1	1	1	1	1	1	1	1	1	1	1	1	1	1	1	1	1	1	1	1	1	1	1	1	1	1	1	1	1	1	1	1	1
AX-147221305	Aradu.A04	120927787	0	0	2	2	2	1	1	1	1	1	1	1	1	1	1	1	1	1	1	1	1	1	1	1	1	1	1	1	1	1	1	1	1	1	1	1	1	1	1	1	1	1
AX-147221310	Aradu.A01	21309019	2	2	0	0	0	1	1	1	1	1	1	1	1	1	1	1	1	1	1	1	1	1	1	1	1	1	1	1	1	1	1	1	1	1	1	1	1	1	1	1	1	1
AX-147221311	Aradu.A04	120928737	0	0	2	2	2	1	1	1	1	1	1	1	1	1	1	1	1	1	1	1	1	1	1	1	1	1	1	1	1	1	1	1	1	1	1	1	1	1	1	1	1	1
AX-147221312	Aradu.A04	120928865	0	0	2	2	2	1	1	1	1	1	1	1	1	1	1	1	1	1	1	1	1	1	1	1	1	1	1	1	1	1	1	1	1	1	1	1	1	1	1	1	1	1
AX-147221314	Aradu.A04	120929244	0	0	2	2	2	1	1	1	2	1	1	1	1	1	1	1	1	1	1	1	1	1	1	1	1	1	1	1	1	1	1	1	1	1	1	1	1	1	1	1	1	1
AX-147221315	Aradu.A04	121315956	2	2	0	0	0	1	1	1	1	1	1	1	1	1	1	1	1	1	1	1	1	1	1	1	1	1	1	1	1	1	1	1	1	1	1	1	1	1	1	1	1	1
AX-147221332	Aradu.A04	121110175	0	0	2	2	2	1	1	1	1	1	1	1	1	1	1	1	1	1	1	1	1	1	1	1	1	1	1	1	1	1	1	1	1	1	1	1	1	1	1	1	1	1
AX-147221354	Aradu.A04	121149943	0	0	2	2	2	1	1	1	1	1	1	1	1	1	1	1	1	1	1	1	1	1	1	1	1	1	1	1	1	1	1	1	1	1	1	1	1	1	1	1	1	1
AX-147221361	Aradu.A04	121182715	0	0	2	2	2	1	1	1	1	1	1	1	1	1	1	1	1	1	1	1	1	1	1	1	1	1	1	1	1	1	1	1	1	1	1	1	1	1	1	1	1	1
AX-147221369	Aradu.A04	121228311	0	0	2	2	2	1	1	1	1	1	1	1	1	1	1	1	1	1	1	1	1	1	1	1	1	1	1	1	1	1	1	1	1	1	1	1	1	1	1	1	1	1
AX-147221370	Aradu.A04	121228385	0	0	2	2	2	1	1	1	1	1	1	1	1	1	1	1	1	1	1	1	1	1	1	1	1	1	1	1	1	1	1	1	1	1	1	1	1	1	1	1	1	1
AX-147221372	Aradu.A05	1503648	2	2	0	0	0	1	1	1	1	1	1	1	1	1	1	1	1	1	1	1	1	1	1	1	1	1	1	1	1	1	1	1	1	1	1	1	1	1	1	1	1	1
AX-147221373	Aradu.A04	121229677	0	0	2	2	2	1	1	1	1	1	1	1	1	1	1	1	1	1	1	1	1	1	1	1	1	1	1	1	1	1	1	1	1	1	1	1	1	1	1	1	1	1
AX-147221468	Aradu.A05	14390839	2	2	0	0	0	1	1	1	1	1	1	1	1	1	1	1	1	1	1	1	1	1	1	1	1	1	1	1	1	1	1	1	1	1	1	1	1	1	1	1	1	1
AX-147221469	Aradu.A05	1505371	0	0	2	2	2	1	1	1	1	1	1	1	1	1	1	1	1	1	1	1	1	1	1	1	1	1	1	1	1	1	1	1	1	1	1	1	1	1	1	1	1	1
AX-147221474	Aradu.A05	1897439	0	0	2	2	2	1	1	1	1	1	1	1	1	1	1	1	1	1	1	1	1	1	1	1	1	1	1	1	1	1	1	1	1	1	1	1	1	1	1	1	1	1
AX-147221481	Aradu.A05	18807743	2	2	0	0	0	1	1	1	1	1	1	1	1	1	1	1	1	1	1	1	1	1	1	1	1	1	1	1	1	1	1	1	1	1	1	1	1	1	1	1	1	1
AX-147221533	Aradu.A05	3683644	0	0	2	2	2	1	1	1	1	1	1	1	1	1	1	1	1	1	1	1	1	1	1	1	1	1	1	1	1	1	1	1	1	1	1	1	1	1	1	1	1	1
AX-147221554	Aradu.A05	4173675	0	0	2	2	2	1	1	1	1	1	1	1	1	1	1	1	1	1	1	1	1	1	1	1	1	1	1	1	1	1	1	1	1	1	1	1	1	1	1	1	1	1
AX-147221569	Aradu.A05	5149914	0	0	2	2	2	1	1	1	1	1	1	1	1	1	1	1	1	1	1	1	1	1	1	1	1	1	1	1	1	1	1	1	1	1	1	1	1	1	1	1	1	1
AX-147221670	Aradu.A05	7798555	0	0	2	2	2	1	1	1	1	1	1	1	1	1	1	1	1	1	1	1	1	1	1	1	1	1	1	1	1	1	1	1	1	1	1	1	1	1	1	1	1	1
AX-147221671	Aradu.A05	7799505	0	0	2	2	2	1	1	1	1	1	1	1	1	1	1	1	1	1	1	1	1	1	1	1	1	1	1	1	1	1	1	1	1	1	1	1	1	1	1	1	1	1
AX-147221723	Aradu.A05	8741645	0	0	2	2	2	1	1	1	1	1	1	1	1	1	1	1	1	1	1	1	1	1	1	1	1	1	1	1	1	1	1	1	1	1	1	1	1	1	1	1	1	1
AX-147221842	Aradu.A05	11952249	0	0	2	2	2	1	1	1	1	1	1	1	1	1	1	1	1	1	1	1	1	1	1	1	1	1	1	1	1	1	1	1	1	1	1	1	1	1	1	1	1	1
AX-147221883	Aradu.A05	13471013	0	NoCall	2	2	2	1	1	1	1	1	1	1	1	1	1	1	1	1	1	1	1	1	1	1	1	1	1	1	1	1	1	1	1	1	1	1	1	1	1	1	1	1
AX-147221927	Aradu.A05	20105688	2	2	0	0	0	1	1	1	1	1	1	1	1	1	1	1	1	1	1	1	1	1	1	1	1	1	1	1	1	1	1	1	1	1	1	1	1	1	1	1	1	1
AX-147221978	Aradu.A05	15419135	0	0	2	2	2	1	1	1	1	1	1	1	1	1	1	1	1	1	1	1	1	1	1	1	1	1	1	1	1	1	1	1	1	1	1	1	1	1	1	1	1	1
AX-147221989	Aradu.A05	15942607	0	0	2	2	2	1	1	1	1	1	1	1	1	1	1	1	1	1	1	1	1	1	1	1	1	1	1	1	1	1	1	1	1	1	1	1	1	1	1	1	1	1
AX-147222053	Aradu.A05	17511832	0	1	2	2	2	1	1	1	1	1	1	1	1	1	1	1	1	1	1	1	1	1	1	1	1	1	1	1	1	1	1	1	1	1	1	1	1	1	1	1	1	1
AX-147222111	Aradu.A05	48515614	2	2	0	0	0	1	1	1	1	1	1	1	1	1	1	1	1	1	1	1	1	1	1	1	1	1	1	1	1	1	1	1	1	1	1	1	1	1	1	1	1	1
AX-147222143	Aradu.A05	76618287	2	2	0	0	0	1	1	1	1	1	1	1	1	1	1	1	1	1	1	1	1	1	1	1	1	1	1	1	1	1	1	1	1	1	1	1	1	1	1	1	1	1
AX-147222153	Aradu.A05	20625331	0	0	2	2	2	1	1	1	1	1	1	1	1	1	1	1	1	1	1	1	1	1	1	1	1	1	1	1	1	1	1	1	1	1	1	1	1	1	1	1	1	1
AX-147222289	Aradu.A05	25983403	0	0	2	2	2	1	1	1	1	1	1	1	1	1	1	1	1	1	1	1	1	1	1	1	1	1	1	1	1	1	1	1	1	1	1	1	1	1	1	1	1	1
AX-147222477	Aradu.A05	84405636	2	2	0	0	0	1	1	1	1	1	1	1	1	1	1	1	1	1	1	1	1	1	1	1	1	1	1	1	1	1	1	1	1	1	1	1	1	1	1	1	1	1
AX-147222635	Aradu.A05	85051714	2	2	0	0	0	1	1	1	1	1	1	1	1	1	1	1	1	1	1	1	1	1	1	1	1	1	1	1	1	1	1	1	1	1	1	1	1	1	1	1	1	1
AX-147222787	Aradu.A05	88081220	2	2	0	0	0	1	1	1	1	1	1	1	1	1	1	1	1	1	1	1	1	1	1	1	1	1	1	1	1	1	1	1	1	1	1	1	1	1	1	1	1	1
AX-147222828	Aradu.A05	89226584	2	2	0	0	0	1	1	1	1	1	1	1	1	1	1	1	1	1	1	1	1	1	1	1	1	1	1	1	1	1	1	1	1	1	1	1	1	1	1	1	1	1
AX-147222841	Aradu.A05	85180015	0	0	2	2	2	1	1	1	1	1	1	1	1	1	1	1	1	1	1	1	1	1	1	1	1	1	1	1	1	1	1	1	1	1	1	1	1	1	1	1	1	1
AX-147223010	Aradu.A05	90381130	2	2	0	0	0	1	1	1	1	1	1	1	1	1	1	1	1	1	1	1	1	1	1	1	1	1	1	1	1	1	1	1	1	1	1	1	1	1	1	1	1	1
AX-147223314	Aradu.A05	101252417	2	2	0	0	0	1	1	1	1	1	1	1	1	1	1	1	1	1	1	1	1	1	1	1	1	1	1	1	1	1	1	1	1	1	1	1	1	1	1	1	1	1
AX-147223427	Aradu.A05	102017621	2	2	0	0	0	1	1	1	1	1	1	1	1	1	1	1	1	1	1	1	1	1	1	1	1	1	1	1	1	1	1	1	1	1	1	1	1	1	1	1	1	1
AX-147223543	Aradu.A05	102118306	2	2	0	0	0	1	1	1	1	1	1	1	1	1	1	1	1	1	1	1	1	1	1	1	1	1	1	1	1	1	1	1	1	1	1	1	1	1	1	1	1	1
AX-147223580	Aradu.A06	409367	2	2	0	0	0	1	1	1	1	1	1	1	1	1	1	1	1	1	1	1	1	1	1	1	1	1	1	1	1	1	1	1	1	1	1	1	1	1	1	1	1	1
AX-147223591	Aradu.A06	1353651	2	2	0	0	0	1	1	1	1	1	1	1	1	1	1	1	1	1	1	1	1	1	1	1	1	1	1	1	1	1	1	1	1	1	1	1	1	1	1	1	1	1
AX-147223950	Aradu.A05	108455088	0	0	2	2	2	1	1	1	1	1	1	1	1	1	1	1	1	1	1	1	1	1	1	1	1	1	1	1	1	1	1	1	1	1	1	1	1	1	1	1	1	1
AX-147224143	Aradu.A06	845322	2	2	0	0	0	1	1	1	1	1	1	1	1	1	1	1	1	1	1	1	1	1	1	1	1	1	1	1	1	1	1	1	1	1	1	1	1	1	1	1	1	1
AX-147224181	Aradu.A06	34794095	2	2	0	0	0	1	1	1	1	1	1	1	1	1	1	1	1	1	1	1	1	1	1	1	1	1	1	1	1	1	1	1	1	1	1	1	1	1	1	1	1	1
AX-147224436	Aradu.A06	4818060	0	0	2	2	2	1	1	1	1	1	1	1	1	1	1	1	1	1	1	1	1	1	1	1	1	1	1	1	1	1	1	1	1	1	1	1	1	1	1	1	1	1
AX-147224857	Aradu.A06	11280689	0	0	2	2	2	1	1	1	1	1	1	1	1	1	1	1	1	1	1	1	1	1	1	1	1	1	1	1	1	1	1	1	1	1	1	1	1	1	1	1	1	1
AX-147225216	Aradu.A06	19566316	0	0	2	2	2	1	1	1	1	1	1	1	1	1	1	1	1	1	1	1	1	1	1	1	1	1	1	1	1	1	1	1	1	1	1	1	1	1	1	1	1	1
AX-147225331	Aradu.A06	110918193	2	2	0	0	0	1	1	1	1	1	1	1	1	1	1	1	1	1	1	1	1	1	1	1	1	1	1	1	1	1	1	1	1	1	1	1	1	1	1	1	1	1
AX-147225665	Aradu.A06	112447942	2	2	0	0	0	1	1	1	1	1	1	1	1	1	1	1	1	1	1	1	1	1	1	1	1	1	1	1	1	1	1	1	1	1	1	1	1	1	1	1	1	1
AX-147226492	Aradu.A06	108178670	0	0	2	2	2	1	1	1	1	1	1	1	1	1	1	1	1	1	1	1	1	1	1	1	1	1	1	1	1	1	1	1	1	1	1	1	1	1	1	1	1	1
AX-147226733	Aradu.A07	1391393	2	2	0	0	0	1	1	1	1	1	1	1	1	1	1	1	1	1	1	1	1	1	1	1	1	1	1	1	1	1	1	1	1	1	1	1	1	1	1	1	1	1
AX-147226904	Aradu.A07	1094298	0	0	2	2	2	1	1	1	1	1	1	1	1	1	1	1	1	1	1	1	1	1	1	1	1	1	1	1	1	1	1	1	1	1	1	1	1	1	1	1	1	1
AX-147226905	Aradu.A07	1098023	0	0	2	2	2	1	1	1	1	1	1	1	1	1	1	1	1	1	1	1	1	1	1	1	1	1	1	1	1	1	1	1	1	1	1	1	1	1	1	1	1	1
AX-147226908	Aradu.A07	1123019	2	2	0	0	0	1	1	1	1	1	1	1	1	1	1	1	1	1	1	1	1	1	1	1	1	1	1	1	1	1	1	1	1	1	1	1	1	1	1	1	1	1
AX-147226938	Aradu.A07	1368066	0	0	2	2	2	1	1	1	1	1	1	1	1	1	1	1	1	1	1	1	1	1	1	1	1	1	1	1	1	1	1	1	1	1	1	1	1	1	1	1	1	1
AX-147227411	Aradu.A07	5552947	0	NoCall	2	2	2	1	1	1	1	1	1	1	1	1	1	1	1	1	1	1	1	1	1	1	1	1	1	1	1	1	1	1	1	1	1	1	1	1	1	1	1	1
AX-147227454	Aradu.A07	6131680	0	0	2	2	2	1	1	1	1	1	1	1	1	1	1	1	1	1	1	1	1	1	1	1	1	1	1	1	1	1	1	1	1	1	1	1	1	1	1	1	1	1
AX-147227651	Aradu.A07	9928553	0	0	2	2	2	1	1	1	1	1	1	1	1	1	1	1	1	1	1	1	1	1	1	1	1	1	1	1	1	1	1	1	1	1	1	1	1	1	1	1	1	1
AX-147227996	Aradu.A07	21626545	0	0	2	2	2	1	1	1	1	1	1	1	1	1	1	1	1	1	1	1	1	1	1	1	1	1	1	1	1	1	1	1	1	1	1	1	1	1	1	1	1	1
AX-147228171	Aradu.A07	30112119	2	2	0	0	0	1	1	1	1	1	1	1	1	1	1	1	1	1	1	1	1	1	1	1	1	1	1	1	1	1	1	1	1	1	1	1	1	1	1	1	1	1
AX-147228235	Aradu.A07	54616319	2	2	0	0	0	1	1	1	1	1	1	1	1	1	1	1	1	1	1	1	1	1	1	1	1	1	1	1	1	1	1	1	1	1	1	1	1	1	1	1	1	1
AX-147228255	Aradu.A07	38192955	0	0	2	2	2	1	1	1	1	1	1	1	1	1	1	1	1	1	1	1	1	1	1	1	1	1	1	1	1	1	1	1	1	1	1	1	1	1	1	1	1	1
AX-147228307	Aradu.A07	41918518	0	0	2	2	2	1	1	1	1	1	1	1	1	1	1	1	1	1	1	1	1	1	1	1	1	1	1	1	1	1	1	1	1	1	1	1	1	1	1	1	1	1
AX-147228331	Aradu.A07	45427038	0	0	2	2	2	1	1	1	1	1	1	1	1	1	1	1	1	1	1	1	1	1	1	1	1	1	1	1	1	1	1	1	1	1	1	1	1	1	1	1	1	1
AX-147228396	Aradu.A07	65956077	2	2	0	0	0	1	1	1	1	1	1	1	1	1	1	1	1	1	1	1	1	1	1	1	1	1	1	1	1	1	1	1	1	1	1	1	1	1	1	1	1	1
AX-147228436	Aradu.A07	54359602	0	0	2	2	2	1	1	1	1	1	1	1	1	1	1	1	1	1	1	1	1	1	1	1	1	1	1	1	1	1	1	1	1	1	1	1	1	1	1	1	1	1
AX-147228444	Aradu.A08	4549479	2	2	0	0	0	1	1	1	1	1	1	1	1	1	1	1	1	1	1	1	1	1	1	1	1	1	1	1	1	1	1	1	1	1	1	1	1	1	1	1	1	1
AX-147228456	Aradu.A07	55194897	0	0	2	2	2	1	1	1	1	1	1	1	1	1	1	1	1	1	1	1	1	1	1	1	1	1	1	1	1	1	1	1	1	1	1	1	1	1	1	1	1	1
AX-147228630	Aradu.A07	65953700	0	0	2	2	2	1	1	1	1	1	1	1	1	1	1	1	1	1	1	1	1	1	1	1	1	1	1	1	1	1	1	1	1	1	1	1	1	1	1	1	1	1
AX-147228772	Aradu.A07	70881165	0	0	2	2	2	1	1	1	1	1	1	1	1	1	1	1	1	1	1	1	1	1	1	1	1	1	1	1	1	1	1	1	1	1	1	1	1	1	1	1	1	1
AX-147229063	Aradu.A07	76668241	0	0	2	2	2	1	1	1	1	1	1	1	1	1	1	1	1	1	1	1	1	1	1	1	1	1	1	1	1	1	1	1	1	1	1	1	1	1	1	1	1	1
AX-147229202	Aradu.A08	1796570	0	0	2	2	2	1	1	1	1	1	1	1	1	1	1	1	1	1	1	1	1	1	1	1	1	1	1	1	1	1	1	1	1	1	1	1	1	1	1	1	1	1
AX-147229297	Aradu.A08	4143558	0	0	2	2	2	1	1	1	1	1	1	1	1	1	1	1	1	1	1	1	1	1	1	1	1	1	1	1	1	1	1	1	1	1	1	1	1	1	1	1	1	1
AX-147229344	Aradu.A08	4440073	0	0	2	2	2	1	1	1	1	1	1	1	1	1	1	1	1	1	1	1	1	1	1	1	1	1	1	1	1	1	1	1	1	1	1	1	1	1	1	1	1	1
AX-147229360	Aradu.A08	6250330	2	2	0	0	0	1	1	1	1	1	1	1	1	1	1	1	1	1	1	1	1	1	1	1	1	1	1	1	1	1	1	1	1	1	1	1	1	1	1	1	1	1
AX-147229413	Aradu.A08	7777868	2	2	0	0	0	1	1	1	1	1	1	1	1	1	1	1	1	1	1	1	1	1	1	1	1	1	1	1	1	1	1	1	1	1	1	1	1	1	1	1	1	1
AX-147229417	Aradu.A08	5031679	2	2	0	0	0	1	1	1	1	1	1	1	1	1	1	1	1	1	1	1	1	1	1	1	1	1	1	1	1	1	1	1	1	1	1	1	1	1	1	1	1	1
AX-147229420	Aradu.A08	5061377	2	2	0	0	0	1	1	1	1	1	1	1	1	1	1	1	1	1	1	1	1	1	1	1	1	1	1	1	1	1	1	1	1	1	1	1	1	1	1	1	1	1
AX-147229527	Aradu.A08	6028901	2	2	0	0	0	1	1	1	1	1	1	1	1	1	1	1	1	1	1	1	1	1	1	1	1	1	1	1	1	1	1	1	1	1	1	1	1	1	1	1	1	1
AX-147229541	Aradu.A08	11123628	2	2	0	0	0	1	1	1	1	1	1	1	1	1	1	1	1	1	1	1	1	1	1	1	1	1	1	1	1	1	1	1	1	1	1	1	1	1	1	1	1	1
AX-147229543	Aradu.A08	6250906	0	0	2	2	2	1	1	1	1	1	1	1	1	1	1	1	1	1	1	1	1	1	1	1	1	1	1	1	1	1	1	1	1	1	1	1	1	1	1	1	1	1
AX-147229567	Aradu.A08	6490704	2	2	0	0	0	1	1	1	1	1	1	1	1	1	1	1	1	1	1	1	1	1	1	1	1	1	1	1	1	1	1	1	1	1	1	1	1	1	1	1	1	1
AX-147229593	Aradu.A08	6743170	NoCall	0	2	2	2	1	1	1	1	1	1	1	1	1	1	1	1	1	1	1	1	1	1	1	1	1	1	1	1	1	1	1	1	1	1	1	1	1	1	1	1	1
AX-147229597	Aradu.A08	6751240	2	2	0	0	0	1	1	1	1	1	1	1	1	1	1	1	1	1	1	1	1	1	1	1	1	1	1	1	1	1	1	1	1	1	1	1	1	1	1	1	1	1
AX-147229677	Aradu.A08	11228110	2	2	0	0	0	1	1	1	1	1	1	1	1	1	1	1	1	1	1	1	1	1	1	1	1	1	1	1	1	1	1	1	1	1	1	1	1	1	1	1	1	1
AX-147229823	Aradu.A08	13512670	2	2	0	0	0	1	1	1	1	1	1	1	1	1	1	1	1	1	1	1	1	1	1	1	1	1	1	1	1	1	1	1	1	1	1	1	1	1	1	1	1	1
AX-147229828	Aradu.A08	14571281	2	2	0	0	0	1	1	1	1	1	1	1	1	1	1	1	1	1	1	1	1	1	1	1	1	1	1	1	1	1	1	1	1	1	1	1	1	1	1	1	1	1
AX-147229941	Aradu.A08	23689203	2	2	0	0	0	1	1	1	1	1	1	1	1	1	1	1	1	1	1	1	1	1	1	1	1	1	1	1	1	1	1	1	1	1	1	1	1	1	1	1	1	1
AX-147230350	Aradu.A08	26279671	2	2	0	0	0	1	1	1	1	1	1	1	1	1	1	1	1	1	1	1	1	1	1	1	1	1	1	1	1	1	1	1	1	1	1	1	1	1	1	1	1	1
AX-147230359	Aradu.A08	23742438	0	0	2	2	2	1	1	1	1	1	1	1	1	1	1	1	1	1	1	1	1	1	1	1	1	1	1	1	1	1	1	1	1	1	1	1	1	1	1	1	1	1
AX-147230385	Aradu.A08	27105091	2	2	0	0	0	1	1	1	1	1	1	1	1	1	1	1	1	1	1	1	1	1	1	1	1	1	1	1	1	1	1	1	1	1	1	1	1	1	1	1	1	1
AX-147230493	Aradu.A08	27561476	2	2	0	0	0	1	1	1	1	1	1	1	1	1	1	1	1	1	1	1	1	1	1	1	1	1	1	1	1	1	1	1	1	1	1	1	1	1	1	1	1	1
AX-147230528	Aradu.A08	30224554	2	2	0	0	0	1	1	1	1	1	1	1	1	1	1	1	1	1	1	1	1	1	1	1	1	1	1	1	1	1	1	1	1	1	1	1	1	1	1	1	1	1
AX-147230552	Aradu.A08	27563283	2	NoCall	0	0	0	1	1	1	1	1	1	1	1	1	1	1	1	1	1	1	1	1	1	1	1	1	1	1	1	1	1	1	1	1	1	1	1	1	1	1	1	1
AX-147230705	Aradu.A08	33972164	2	2	0	0	0	1	1	1	1	1	1	1	1	1	1	1	1	1	1	1	1	1	1	1	1	1	1	1	1	1	1	1	1	1	1	1	1	1	1	1	1	1
AX-147230771	Aradu.A08	37316376	2	2	0	0	0	1	1	1	1	1	1	1	1	1	1	1	1	1	1	1	1	1	1	1	1	1	1	1	1	1	1	1	1	1	1	1	1	1	1	1	1	1
AX-147230776	Aradu.A08	31537551	2	2	0	0	0	1	1	1	1	1	1	1	1	1	1	1	1	1	1	1	1	1	1	1	1	1	1	1	1	1	1	1	1	1	1	1	1	1	1	1	1	1
AX-147230806	Aradu.A08	32319175	0	0	2	2	2	1	1	1	1	1	1	1	1	1	1	1	1	1	1	1	1	1	1	1	1	1	1	1	1	1	1	1	1	1	1	1	1	1	1	1	1	1
AX-147230902	Aradu.A08	37337027	2	2	0	0	0	1	1	1	1	1	1	1	1	1	1	1	1	1	1	1	1	1	1	1	1	1	1	1	1	1	1	1	1	1	1	1	1	1	1	1	1	1
AX-147230998	Aradu.A08	35781296	0	0	2	2	2	1	1	1	1	1	1	1	1	1	1	1	1	1	1	1	1	1	1	1	1	1	1	1	1	1	1	1	1	1	1	1	1	1	1	1	1	1
AX-147231017	Aradu.A08	36456901	0	0	2	2	2	1	1	1	1	1	1	1	1	1	1	1	1	1	1	1	1	1	1	1	1	1	1	1	1	1	1	1	1	1	1	1	1	1	1	1	1	1
AX-147231065	Aradu.A08	38192821	2	2	0	0	0	1	1	1	1	1	1	1	1	1	1	1	1	1	1	1	1	1	1	1	1	1	1	1	1	1	1	1	1	1	1	1	1	1	1	1	1	1
AX-147231072	Aradu.A08	41585057	2	2	0	0	0	1	1	1	1	1	1	1	1	1	1	1	1	1	1	1	1	1	1	1	1	1	1	1	1	1	1	1	1	1	1	1	1	1	1	1	1	1
AX-147231090	Aradu.A08	43835395	2	2	0	0	0	1	1	1	1	1	1	1	1	1	1	1	1	1	1	1	1	1	1	1	1	1	1	1	1	1	1	1	1	1	1	1	1	1	1	1	1	1
AX-147231127	Aradu.A08	41905980	2	2	0	0	0	1	1	1	1	1	1	1	1	1	1	1	1	1	1	1	1	1	1	1	1	1	1	1	1	1	1	1	1	1	1	1	1	1	1	1	1	1
AX-147231339	Aradu.A08	41227099	0	0	2	2	2	1	1	1	1	1	1	1	1	1	1	1	1	1	1	1	1	1	1	1	1	1	1	1	1	1	1	1	1	1	1	1	1	1	1	1	1	1
AX-147231358	Aradu.A08	43956898	2	2	0	0	0	1	1	1	1	1	1	1	1	1	1	1	1	1	1	1	1	1	1	1	1	1	1	1	1	1	1	1	1	1	1	1	1	1	1	1	1	1
AX-147231390	Aradu.A08	44972020	2	2	0	0	0	1	1	1	1	1	1	1	1	1	1	1	1	1	1	1	1	1	1	1	1	1	1	1	1	1	1	1	1	1	1	1	1	1	1	1	1	1
AX-147231626	Aradu.A08	44714792	0	0	2	2	2	1	1	1	1	1	1	1	1	1	1	1	1	1	1	1	1	1	1	1	1	1	1	1	1	1	1	1	1	1	1	1	1	1	1	1	1	1
AX-147231642	Aradu.A08	48129464	2	2	0	0	0	1	1	1	1	1	1	1	1	1	1	1	1	1	1	1	1	1	1	1	1	1	1	1	1	1	1	1	1	1	1	1	1	1	1	1	1	1
AX-147231898	Aradu.A09	2658242	2	2	0	0	0	1	1	1	1	1	1	1	1	1	1	1	1	1	1	1	1	1	1	1	1	1	1	1	1	1	1	1	1	1	1	1	1	1	1	1	1	1
AX-147231905	Aradu.A08	48002477	0	0	2	2	2	1	1	1	1	1	1	1	1	1	1	1	1	1	1	1	1	1	1	1	1	1	1	1	1	1	1	1	1	1	1	1	1	1	1	1	1	1
AX-147231925	Aradu.A09	3564966	2	2	0	0	0	1	1	1	1	1	1	1	1	1	1	1	1	1	1	1	1	1	1	1	1	1	1	1	1	1	1	1	1	1	1	1	1	1	1	1	1	1
AX-147232113	Aradu.A09	935413	0	0	2	2	2	1	1	1	1	1	1	1	1	1	1	1	1	1	1	1	1	1	1	1	1	1	1	1	1	1	1	1	1	1	1	1	1	1	1	1	1	1
AX-147232169	Aradu.A09	113339943	2	2	0	0	0	1	1	1	1	1	1	1	1	1	1	1	1	1	1	1	1	1	1	1	1	1	1	1	1	1	1	1	1	1	1	1	1	1	1	1	1	1
AX-147232188	Aradu.A09	1630464	0	0	2	2	2	1	1	1	1	1	1	1	1	1	1	1	1	1	1	1	1	1	1	1	1	1	1	1	1	1	1	1	1	1	1	1	1	1	1	1	1	1
AX-147232203	Aradu.A09	1727445	0	0	2	2	2	1	1	1	1	1	1	1	1	1	1	1	1	1	1	1	1	1	1	1	1	1	1	1	1	1	1	1	1	1	1	1	1	1	1	1	1	1
AX-147232206	Aradu.A09	1801348	0	0	2	2	2	1	1	1	1	1	1	1	1	1	1	1	1	1	1	1	1	1	1	1	1	1	1	1	1	1	1	1	1	1	1	1	1	1	1	1	1	1
AX-147232262	Aradu.A09	10996791	2	2	0	0	0	1	1	1	1	1	1	1	1	1	1	1	1	1	1	1	1	1	1	1	1	1	1	1	1	1	1	1	1	1	1	1	1	1	1	1	1	1
AX-147232346	Aradu.A09	14867726	2	2	0	0	0	1	1	1	1	1	1	1	1	1	1	1	1	1	1	1	1	1	1	1	1	1	1	1	1	1	1	1	1	1	1	1	1	1	1	1	1	1
AX-147233704	Aradu.A09	99138682	2	2	0	0	0	1	1	1	1	1	1	1	1	1	1	1	1	1	1	1	1	1	1	1	1	1	1	1	1	1	1	1	1	1	1	1	1	1	1	1	1	1
AX-147234367	Aradu.A09	114180352	0	0	2	2	2	1	1	1	1	1	1	1	1	1	1	1	1	1	1	1	1	1	1	1	1	1	1	1	1	1	1	1	1	1	1	1	1	1	1	1	1	1
AX-147234383	Aradu.A09	114466105	0	0	2	2	2	1	1	1	1	1	1	1	1	1	1	1	1	1	1	1	1	1	1	1	1	1	1	1	1	1	1	1	1	1	1	1	1	1	1	1	1	1
AX-147234469	Aradu.A09	115432582	0	0	2	2	2	1	1	1	1	1	1	1	1	1	1	1	1	1	1	1	1	1	1	1	1	1	1	1	1	1	1	1	1	1	1	1	1	1	1	1	1	1
AX-147234580	Aradu.A09	116404019	0	0	2	2	2	1	1	1	1	1	1	1	1	1	1	1	1	1	1	1	1	1	1	1	1	1	1	1	1	1	1	1	1	1	1	1	1	1	1	1	1	1
AX-147234672	Aradu.A10	308195	2	2	0	0	0	1	1	1	1	1	1	1	1	1	1	1	1	1	1	1	1	1	1	1	1	1	1	1	1	1	1	1	1	1	1	1	1	1	1	1	1	1
AX-147234743	Aradu.A09	118600614	0	0	2	2	2	1	1	1	1	1	1	1	1	1	1	1	1	1	1	1	1	1	1	1	1	1	1	1	1	1	1	1	1	1	1	1	1	1	1	1	1	1
AX-147234745	Aradu.A10	429033	2	2	0	0	0	1	1	1	1	1	1	1	1	1	1	1	1	1	1	1	1	1	1	1	1	1	1	1	1	1	1	1	1	1	1	1	1	1	1	1	1	1
AX-147234790	Aradu.A09	119541688	2	2	0	0	0	1	1	1	1	1	1	1	1	1	1	1	1	1	1	1	1	1	1	1	1	1	1	1	1	1	1	1	1	1	1	1	1	1	1	1	1	1
AX-147234806	Aradu.A09	119919886	0	0	2	2	2	1	1	1	1	1	1	1	1	1	1	1	1	1	1	1	1	1	1	1	1	1	1	1	1	1	1	1	1	1	1	1	1	1	1	1	1	1
AX-147234857	Aradu.A10	2009735	2	2	0	0	0	1	1	1	1	1	1	1	1	1	1	1	1	1	1	1	1	1	1	1	1	1	1	1	1	1	1	1	1	1	1	1	1	1	1	1	1	1
AX-147234871	Aradu.A10	2878734	2	2	0	0	0	1	1	1	1	1	1	1	1	1	1	1	1	1	1	1	1	1	1	1	1	1	1	1	1	1	1	1	1	1	1	1	1	1	1	1	1	1
AX-147234963	Aradu.A10	5364553	2	2	0	0	0	1	1	1	1	1	1	1	1	1	1	1	1	1	1	1	1	1	1	1	1	1	1	1	1	1	1	1	1	1	1	1	1	1	1	1	1	1
AX-147234988	Aradu.A10	2249668	0	0	2	2	2	1	1	1	1	1	1	1	1	1	1	1	1	1	1	1	1	1	1	1	1	1	1	1	1	1	1	1	1	1	1	1	1	1	1	1	1	1
AX-147235016	Aradu.A10	2688934	NoCall	0	2	2	2	1	1	1	1	1	1	1	1	1	1	1	1	1	1	1	1	1	1	1	1	1	1	1	1	1	1	1	1	1	1	1	1	1	1	1	1	1
AX-147235036	Aradu.A10	6942236	2	2	0	0	0	1	1	1	1	1	1	1	1	1	1	1	1	1	1	1	1	1	1	1	1	1	1	1	1	1	1	1	1	1	1	1	1	1	1	1	1	1
AX-147235265	Aradu.A10	12170279	0	NoCall	1	1	1	1	1	1	1	1	1	1	1	1	1	1	1	1	1	1	1	1	1	1	1	1	1	1	1	1	1	1	1	1	1	1	1	1	1	1	1	1
AX-147235376	Aradu.A10	17173133	2	2	0	0	0	1	1	1	1	1	1	1	1	1	1	1	1	1	1	1	1	1	1	1	1	1	1	1	1	1	1	1	1	1	1	1	1	1	1	1	1	1
AX-147235445	Aradu.A10	8951968	0	0	2	2	2	1	1	1	1	1	1	1	1	1	1	1	1	1	1	1	1	1	1	1	1	1	1	1	1	1	1	1	1	1	1	1	1	1	1	1	1	1
AX-147235451	Aradu.A10	9085599	0	0	2	2	2	1	1	1	1	1	1	1	1	1	1	1	1	1	1	1	1	1	1	1	1	1	1	1	1	1	1	1	1	1	1	1	1	1	1	1	1	1
AX-147235475	Aradu.A10	9499438	0	0	2	2	2	1	1	1	1	1	1	1	1	1	1	1	1	1	1	1	1	1	1	1	1	1	1	1	1	1	1	1	1	1	1	1	1	1	1	1	1	1
AX-147235525	Aradu.A10	11105495	0	0	2	2	2	1	1	1	1	1	1	1	1	1	1	1	1	1	1	1	1	1	1	1	1	1	1	1	1	1	1	1	1	1	1	1	1	1	1	1	1	1
AX-147235592	Aradu.A10	20469715	2	2	0	0	0	1	1	1	1	1	1	1	1	1	1	1	1	1	1	1	1	1	1	1	1	1	1	1	1	1	1	1	1	1	1	1	1	1	1	1	1	1
AX-147235607	Aradu.A10	66609085	2	2	0	0	0	1	1	1	1	1	1	1	1	1	1	1	1	1	1	1	1	1	1	1	1	1	1	1	1	1	1	1	1	1	1	1	1	1	1	1	1	1
AX-147235669	Aradu.A10	84919124	2	2	0	0	0	1	1	1	1	1	1	1	1	1	1	1	1	1	1	1	1	1	1	1	1	1	1	1	1	1	1	1	1	1	1	1	1	1	1	1	1	1
AX-147235810	Araip.B06	11352017	2	2	0	0	0	1	1	1	1	1	1	1	1	1	1	1	1	1	1	1	1	1	1	1	1	1	1	1	1	1	1	1	1	1	1	1	1	1	1	1	1	1
AX-147235853	Aradu.A10	39468282	2	2	0	0	0	1	1	1	1	1	1	1	1	1	1	1	1	1	1	1	1	1	1	1	1	1	1	1	1	1	1	1	1	1	1	1	1	1	1	1	1	1
AX-147235900	Aradu.A10	46474322	0	0	2	2	2	1	1	1	1	1	1	1	1	1	1	1	1	1	1	1	1	1	1	1	1	1	1	1	1	1	1	1	1	1	1	1	1	1	1	1	1	1
AX-147236019	Aradu.A10	66509038	0	0	2	2	2	1	1	1	1	1	1	1	1	1	1	1	1	1	1	1	1	1	1	1	1	1	1	1	1	1	1	1	1	1	1	1	1	1	1	1	1	1
AX-147236024	Aradu.A10	98411536	2	2	0	0	0	1	1	1	1	1	1	1	1	1	1	1	1	1	1	1	1	1	1	1	1	1	1	1	1	1	1	1	1	1	1	1	1	1	1	1	1	1
AX-147236043	Aradu.A10	67381179	0	0	2	2	2	1	1	1	1	1	1	1	1	1	1	1	1	1	1	1	1	1	1	1	1	1	1	1	1	1	1	1	1	1	1	1	1	1	1	1	1	1
AX-147236052	Aradu.A10	67726919	0	0	2	2	2	1	1	1	1	1	1	1	1	1	1	1	1	1	1	1	1	1	1	1	1	1	1	1	1	1	1	1	1	1	1	1	1	1	1	1	1	1
AX-147236142	Aradu.A10	77365467	0	0	2	2	2	1	1	1	1	1	1	1	1	1	1	1	1	1	1	1	1	1	1	1	1	1	1	1	1	1	1	1	1	1	1	1	1	1	1	1	1	1
AX-147236232	Aradu.A10	98438790	2	2	0	0	0	1	1	1	1	1	1	1	1	1	1	1	1	1	1	1	1	1	1	1	1	1	1	1	1	1	1	1	1	1	1	1	1	1	1	1	1	1
AX-147236272	Aradu.A10	87877682	NoCall	0	2	2	2	1	1	1	1	1	1	1	1	1	1	1	1	1	1	1	1	1	1	1	1	1	1	1	1	1	1	1	1	1	1	1	1	1	1	1	1	1
AX-147236283	Aradu.A10	88235230	2	NoCall	0	0	0	1	1	1	1	1	1	1	1	1	1	1	1	1	1	1	1	1	1	1	1	1	1	1	1	1	1	1	1	1	1	1	1	1	1	1	1	1
AX-147236410	Aradu.A10	93463042	0	0	2	2	2	1	1	1	1	1	1	1	1	1	1	1	1	1	1	1	1	1	1	1	1	1	1	1	1	1	1	1	1	1	1	1	1	1	1	1	1	1
AX-147236444	Aradu.A10	95631748	0	0	2	2	2	1	1	1	1	1	1	1	1	1	1	1	1	1	1	1	1	1	1	1	1	1	1	1	1	1	1	1	1	1	1	1	1	1	1	1	1	1
AX-147236533	Aradu.A10	104942325	2	2	0	0	0	1	1	1	1	1	1	1	1	1	1	1	1	1	1	1	1	1	1	1	1	1	1	1	1	1	1	1	1	1	1	1	1	1	1	1	1	1
AX-147236666	Aradu.A10	101080993	2	2	0	0	0	1	1	1	1	1	1	1	1	1	1	1	1	1	1	1	1	1	1	1	1	1	1	1	1	1	1	1	1	1	1	1	1	1	1	1	1	1
AX-147236762	Aradu.A10	102801770	0	0	2	2	2	1	1	1	1	1	1	1	1	1	1	1	1	1	1	1	1	1	1	1	1	1	1	1	1	1	1	1	1	1	1	1	1	1	1	1	1	1
AX-147236764	Aradu.A01	9636945	2	2	0	0	0	1	1	1	1	1	1	1	1	1	1	1	1	1	1	1	1	1	1	1	1	1	1	1	1	1	1	1	1	1	1	1	1	1	1	1	1	1
AX-147236812	Araip.B02	1297110	NoCall	1	0	0	0	1	1	1	1	1	1	1	1	1	1	1	1	1	1	1	1	1	1	1	1	1	1	1	1	1	1	1	1	1	1	1	1	1	1	1	1	1
AX-147236879	Araip.B01	5435484	2	2	0	0	0	1	1	1	1	1	1	1	1	1	1	1	1	1	1	1	1	1	1	1	1	1	1	1	1	1	1	1	1	1	1	1	1	1	1	1	1	1
AX-147236959	Araip.B01	123452625	2	2	0	0	0	1	1	1	1	1	1	1	1	1	1	1	1	1	1	1	1	1	1	1	1	1	1	1	1	1	1	1	1	1	1	1	1	1	1	1	1	1
AX-147237004	Aradu.A10	106270200	0	0	2	2	2	1	1	1	1	1	1	1	1	1	1	1	1	1	1	1	1	1	1	1	1	1	1	1	1	1	1	1	1	1	1	1	1	1	1	1	1	1
AX-147237008	Aradu.A10	106303151	0	0	2	2	2	1	1	1	1	1	1	1	1	1	1	1	1	1	1	1	1	1	1	1	1	1	1	1	1	1	1	1	1	1	1	1	1	1	1	1	1	1
AX-147237410	Araip.B01	243959	0	0	2	2	2	1	1	1	1	1	1	1	1	1	1	1	1	1	1	1	1	1	1	1	1	1	1	1	1	1	1	1	1	1	1	1	1	1	1	1	1	1
AX-147237453	Araip.B01	718433	0	0	2	2	2	1	1	1	1	1	1	1	1	1	1	1	1	1	1	1	1	1	1	1	1	1	1	1	1	1	1	1	1	1	1	1	1	1	1	1	1	1
AX-147237773	Araip.B01	124591726	2	2	0	0	0	1	1	1	1	1	1	1	1	1	1	1	1	1	1	1	1	1	1	1	1	1	1	1	1	1	1	1	1	1	1	1	1	1	1	1	1	1
AX-147237896	Araip.B06	12787062	2	2	0	0	0	1	1	1	1	1	1	1	1	1	1	1	1	1	1	1	1	1	1	1	1	1	1	1	1	1	1	1	1	1	1	1	1	1	1	1	1	1
AX-147237924	Araip.B01	9291097	0	0	2	2	2	1	1	1	1	1	1	1	1	1	1	1	1	1	1	1	1	1	1	1	1	1	1	1	1	1	1	1	1	1	1	1	1	1	1	1	1	1
AX-147238089	Araip.B01	14367965	0	0	2	2	2	1	1	1	1	1	1	1	1	1	1	1	1	1	1	1	1	1	1	1	1	1	1	1	1	1	1	1	1	1	1	1	1	1	1	1	1	1
AX-147238877	Araip.B01	119491221	0	0	2	2	2	1	1	1	1	1	1	1	1	1	1	1	1	1	1	1	1	1	1	1	1	1	1	1	1	1	1	1	1	1	1	1	1	1	1	1	1	1
AX-147238882	Araip.B01	119736936	0	0	2	2	2	1	1	1	1	1	1	1	1	1	1	1	1	1	1	1	1	1	1	1	1	1	1	1	1	1	1	1	1	1	1	1	1	1	1	1	1	1
AX-147238994	Araip.B01	123978407	0	0	2	2	2	1	1	1	1	1	1	1	1	1	1	1	1	1	1	1	1	1	1	1	1	1	1	1	1	1	1	1	1	1	1	1	1	1	1	1	1	1
AX-147239086	Araip.B01	126117760	0	0	2	2	2	1	1	1	1	1	1	1	1	1	1	1	1	1	1	1	1	1	1	1	1	1	1	1	1	1	1	1	1	1	1	1	1	1	1	1	1	1
AX-147239117	Araip.B01	129345932	2	2	0	0	0	1	1	1	1	1	1	1	1	1	1	1	1	1	1	1	1	1	1	1	1	1	1	1	1	1	1	1	1	1	1	1	1	1	1	1	1	1
AX-147239173	Araip.B01	127710029	0	0	2	2	2	1	1	1	1	1	1	1	1	1	1	1	1	1	1	1	1	1	1	1	1	1	1	1	1	1	1	1	1	1	1	1	1	1	1	1	1	1
AX-147239193	Araip.B01	133992694	2	2	0	0	0	1	1	1	1	1	1	1	1	1	1	1	1	1	1	1	1	1	1	1	1	1	1	1	1	1	1	1	1	1	1	1	1	1	1	1	1	1
AX-147239232	Araip.B01	136730061	2	2	0	0	0	1	1	1	1	1	1	1	1	1	1	1	1	1	1	1	1	1	1	1	1	1	1	1	1	1	1	1	1	1	1	1	1	1	1	1	1	1
AX-147239644	Araip.B01	136383487	0	0	2	2	2	1	1	1	1	1	1	1	1	1	1	1	1	1	1	1	1	1	1	1	1	1	1	1	1	1	1	1	1	1	1	1	1	1	1	1	1	1
AX-147239680	Araip.B02	769460	2	2	0	0	0	1	1	1	1	1	1	1	1	1	1	1	1	1	1	1	1	1	1	1	1	1	1	1	1	1	1	1	1	1	1	1	1	1	1	1	1	1
AX-147239817	Araip.B02	425792	0	0	2	2	2	1	1	1	1	1	1	1	1	1	1	1	1	1	1	1	1	1	1	1	1	1	1	1	1	1	1	1	1	1	1	1	1	1	1	1	1	1
AX-147239858	Araip.B02	1522203	2	2	0	0	0	1	1	1	1	1	1	1	1	1	1	1	1	1	1	1	1	1	1	1	1	1	1	1	1	1	1	1	1	1	1	1	1	1	1	1	1	1
AX-147239886	Araip.B02	670263	0	0	2	2	2	1	1	1	1	1	1	1	1	1	1	1	1	1	1	1	1	1	1	1	1	1	1	1	1	1	1	1	1	1	1	1	1	1	1	1	1	1
AX-147239944	Araip.B02	2371510	2	2	0	0	0	1	1	1	1	1	1	1	1	1	1	1	1	1	1	1	1	1	1	1	1	1	1	1	1	1	1	1	1	1	1	1	1	1	1	1	1	1
AX-147240000	Araip.B02	1318754	0	0	2	2	2	1	1	1	1	1	1	1	1	1	1	1	1	1	1	1	1	1	1	1	1	1	1	1	1	1	1	1	1	1	1	1	1	1	1	1	1	1
AX-147240093	Araip.B02	1711395	0	0	2	2	2	1	1	1	1	1	1	1	1	1	1	1	1	1	1	1	1	1	1	1	1	1	1	1	1	1	1	1	1	1	1	1	1	1	1	1	1	1
AX-147240145	Araip.B02	1882026	2	2	0	0	0	1	1	1	1	1	1	1	1	1	1	1	1	1	1	1	1	1	1	1	1	1	1	1	1	1	1	1	1	1	1	1	1	1	1	1	1	1
AX-147240199	Araip.B02	2048387	0	0	2	2	2	1	1	1	1	1	1	1	1	1	1	1	1	1	1	1	1	1	1	1	1	1	1	1	1	1	1	1	1	1	1	1	1	1	1	1	1	1
AX-147240306	Araip.B02	2468912	0	0	2	2	2	1	1	1	1	1	1	1	1	1	1	1	1	1	1	1	1	1	1	1	1	1	1	1	1	1	1	1	1	1	1	1	1	1	1	1	1	1
AX-147240330	Araip.B02	4764359	2	2	0	0	0	1	1	1	1	1	1	1	1	1	1	1	1	1	1	1	1	1	1	1	1	1	1	1	1	1	1	1	1	1	1	1	1	1	1	1	1	1
AX-147240359	Araip.B02	2713287	0	0	2	2	2	1	1	1	1	1	1	1	1	1	1	1	1	1	1	1	1	1	1	1	1	1	1	1	1	1	1	1	1	1	1	1	1	1	1	1	1	1
AX-147240504	Araip.B02	6184887	2	2	0	0	0	1	1	1	1	1	1	1	1	1	1	1	1	1	1	1	1	1	1	1	1	1	1	1	1	1	1	1	1	1	1	1	1	1	1	1	1	1
AX-147240508	Araip.B02	6187355	2	2	0	0	0	1	1	1	1	1	1	1	1	1	1	1	1	1	1	1	1	1	1	1	1	1	1	1	1	1	1	1	1	1	1	1	1	1	1	1	1	1
AX-147240542	Araip.B02	6127061	0	0	2	2	2	1	1	1	1	1	1	1	1	1	1	1	1	1	1	1	1	1	1	1	1	1	1	1	1	1	1	1	1	1	1	1	1	1	1	1	1	1
AX-147240552	Araip.B02	6154473	0	0	2	2	2	1	1	1	1	1	1	1	1	1	1	1	1	1	1	1	1	1	1	1	1	1	1	1	1	1	1	1	1	1	1	1	1	1	1	1	1	1
AX-147240566	Araip.B02	22561326	2	2	0	0	0	1	1	1	1	1	1	1	1	1	1	1	1	1	1	1	1	1	1	1	1	1	1	1	1	1	1	1	1	1	1	1	1	1	1	1	1	1
AX-147240570	Araip.B02	6187143	0	0	2	2	2	1	1	1	1	1	1	1	1	1	1	1	1	1	1	1	1	1	1	1	1	1	1	1	1	1	1	1	1	1	1	1	1	1	1	1	1	1
AX-147240572	Araip.B02	22562082	2	2	0	0	0	1	1	1	1	1	1	1	1	1	1	1	1	1	1	1	1	1	1	1	1	1	1	1	1	1	1	1	1	1	1	1	1	1	1	1	1	1
AX-147240573	Araip.B02	6253760	0	0	2	2	2	1	1	1	1	1	1	1	1	1	1	1	1	1	1	1	1	1	1	1	1	1	1	1	1	1	1	1	1	1	1	1	1	1	1	1	1	1
AX-147240595	Araip.B02	6514807	0	0	2	2	2	1	1	1	1	1	1	1	1	1	1	1	1	1	1	1	1	1	1	1	1	1	1	1	1	1	1	1	1	1	1	1	1	1	1	1	1	1
AX-147240619	Araip.B02	6689914	0	0	2	2	2	1	1	1	1	1	1	1	1	1	1	1	1	1	1	1	1	1	1	1	1	1	1	1	1	1	1	1	1	1	1	1	1	1	1	1	1	1
AX-147241098	Araip.B02	30144470	2	2	0	0	0	1	1	1	1	1	1	1	1	1	1	1	1	1	1	1	1	1	1	1	1	1	1	1	1	1	1	1	1	1	1	1	1	1	1	1	1	1
AX-147241860	Araip.B02	90833306	2	2	0	0	0	1	1	1	1	1	1	1	1	1	1	1	1	1	1	1	1	1	1	1	1	1	1	1	1	1	1	1	1	1	1	1	1	1	1	1	1	1
AX-147241961	Araip.B02	92991982	0	0	2	2	2	1	1	1	1	1	1	1	1	1	1	1	1	1	1	1	1	1	1	1	1	1	1	1	1	1	1	1	1	1	1	1	1	1	1	1	1	1
AX-147241982	Araip.B02	93127332	2	2	0	0	0	1	1	1	1	1	1	1	1	1	1	1	1	1	1	1	1	1	1	1	1	1	1	1	1	1	1	1	1	1	1	1	1	1	1	1	1	1
AX-147242026	Araip.B02	101368038	2	2	0	0	0	1	1	1	1	1	1	1	1	1	1	1	1	1	1	1	1	1	1	1	1	1	1	1	1	1	1	1	1	1	1	1	1	1	1	1	1	1
AX-147242106	Araip.B03	1003158	2	2	0	0	0	1	1	1	1	1	1	1	1	1	1	1	1	1	1	1	1	1	1	1	1	1	1	1	1	1	1	1	1	1	1	1	1	1	1	1	1	1
AX-147242257	Araip.B02	98401573	0	0	2	2	2	1	1	1	1	1	1	1	1	1	1	1	1	1	1	1	1	1	1	1	1	1	1	1	1	1	1	1	1	1	1	1	1	1	1	1	1	1
AX-147242411	Araip.B03	1429170	2	2	0	0	0	1	1	1	1	1	1	1	1	1	1	1	1	1	1	1	1	1	1	1	1	1	1	1	1	1	1	1	1	1	1	1	1	1	1	1	1	1
AX-147242454	Araip.B02	102010643	0	0	2	2	2	1	1	1	1	1	1	1	1	1	1	1	1	1	1	1	1	1	1	1	1	1	1	1	1	1	1	1	1	1	1	1	1	1	1	1	1	1
AX-147242562	Araip.B02	103781251	0	0	2	2	2	1	1	1	1	1	1	1	1	1	1	1	1	1	1	1	1	1	1	1	1	1	1	1	1	1	1	1	1	1	1	1	1	1	1	1	1	1
AX-147242927	Araip.B03	2391316	2	NoCall	0	0	0	1	1	1	1	1	1	1	1	1	1	1	1	1	1	1	1	1	1	1	1	1	1	1	1	1	1	1	1	1	1	1	1	1	1	1	1	1
AX-147242956	Araip.B03	7439438	2	2	0	0	0	1	1	1	1	1	1	1	1	1	1	1	1	1	1	1	1	1	1	1	1	1	1	1	1	1	1	1	1	1	1	1	1	1	1	1	1	1
AX-147242983	Araip.B03	1746872	0	0	2	2	2	1	1	1	1	1	1	1	1	1	1	1	1	1	1	1	1	1	1	1	1	1	1	1	1	1	1	1	1	1	1	1	1	1	1	1	1	1
AX-147243069	Araip.B03	15056237	2	2	0	0	0	1	1	1	1	1	1	1	1	1	1	1	1	1	1	1	1	1	1	1	1	1	1	1	1	1	1	1	1	1	1	1	1	1	1	1	1	1
AX-147243156	Araip.B03	3402421	0	0	2	2	2	1	1	1	1	1	1	1	1	1	1	1	1	1	1	1	1	1	1	1	1	1	1	1	1	1	1	1	1	1	1	1	1	1	1	1	1	1
AX-147243604	Araip.B03	10870125	2	2	0	0	0	1	1	1	1	1	1	1	1	1	1	1	1	1	1	1	1	1	1	1	1	1	1	1	1	1	1	1	1	1	1	1	1	1	1	1	1	1
AX-147243722	Araip.B03	12529824	0	0	2	2	2	1	1	1	1	1	1	1	1	1	1	1	1	1	1	1	1	1	1	1	1	1	1	1	1	1	1	1	1	1	1	1	1	1	1	1	1	1
AX-147243802	Araip.B03	13814822	0	0	2	2	2	1	1	1	1	1	1	1	1	1	1	1	1	1	1	1	1	1	1	1	1	1	1	1	1	1	1	1	1	1	1	1	1	1	1	1	1	1
AX-147243876	Araip.B03	105495725	2	2	0	0	0	1	1	1	1	1	1	1	1	1	1	1	1	1	1	1	1	1	1	1	1	1	1	1	1	1	1	1	1	1	1	1	1	1	1	1	1	1
AX-147243986	Araip.B03	128575670	2	2	0	0	0	1	1	1	1	1	1	1	1	1	1	1	1	1	1	1	1	1	1	1	1	1	1	1	1	1	1	1	1	1	1	1	1	1	1	1	1	1
AX-147244878	Araip.B03	102994968	0	0	2	2	2	1	1	1	1	1	1	1	1	1	1	1	1	1	1	1	1	1	1	1	1	1	1	1	1	1	1	1	1	1	1	1	1	1	1	1	1	1
AX-147244905	Araip.B03	133966518	2	2	0	0	0	1	1	1	1	1	1	1	1	1	1	1	1	1	1	1	1	1	1	1	1	1	1	1	1	1	1	1	1	1	1	1	1	1	1	1	1	1
AX-147245065	Araip.B03	113551559	2	2	0	0	0	1	1	1	1	1	1	1	1	1	1	1	1	1	1	1	1	1	1	1	1	1	1	1	1	1	1	1	1	1	1	1	1	1	1	1	1	1
AX-147245814	Araip.B03	128814496	0	0	2	2	2	1	1	1	1	1	1	1	1	1	1	1	1	1	1	1	1	1	1	1	1	1	1	1	1	1	1	1	1	1	1	1	1	1	1	1	1	1
AX-147245844	Araip.B03	129238500	0	0	2	2	2	1	1	1	1	1	1	1	1	1	1	1	1	1	1	1	1	1	1	1	1	1	1	1	1	1	1	1	1	1	1	1	1	1	1	1	1	1
AX-147245974	Araip.B03	130642621	0	0	2	2	2	1	1	1	1	1	1	1	1	1	1	1	1	1	1	1	1	1	1	1	1	1	1	1	1	1	1	1	1	1	1	1	1	1	1	1	1	1
AX-147246048	Araip.B03	131522360	NoCall	0	2	2	2	1	1	1	1	1	1	1	1	1	1	1	1	1	1	1	1	1	1	1	1	1	1	1	1	1	1	1	1	1	1	1	1	1	1	1	1	1
AX-147246204	Araip.B04	9602036	2	2	0	0	0	1	1	1	1	1	1	1	1	1	1	1	1	1	1	1	1	1	1	1	1	1	1	1	1	1	1	1	1	1	1	1	1	1	1	1	1	1
AX-147246379	Araip.B04	395161	0	0	2	2	2	1	1	1	1	1	1	1	1	1	1	1	1	1	1	1	1	1	1	1	1	1	1	1	1	1	1	1	1	1	1	1	1	1	1	1	1	1
AX-147246476	Araip.B04	11294693	2	2	0	0	0	1	1	1	1	1	1	1	1	1	1	1	1	1	1	1	1	1	1	1	1	1	1	1	1	1	1	1	1	1	1	1	1	1	1	1	1	1
AX-147247019	Araip.B04	8843994	0	0	2	2	2	1	1	1	1	1	1	1	1	1	1	1	1	1	1	1	1	1	1	1	1	1	1	1	1	1	1	1	1	1	1	1	1	1	1	1	1	1
AX-147247065	Araip.B04	10497585	0	0	2	2	2	1	1	1	1	1	1	1	1	1	1	1	1	1	1	1	1	1	1	1	1	1	1	1	1	1	1	1	1	1	1	1	1	1	1	1	1	1
AX-147247117	Araip.B04	27243560	2	2	0	0	0	1	1	1	1	1	1	1	1	1	1	1	1	1	1	1	1	1	1	1	1	1	1	1	1	1	1	1	1	1	1	1	1	1	1	1	1	1
AX-147247290	Araip.B04	17583442	NoCall	NoCall	2	2	2	1	1	1	1	1	1	1	1	1	1	1	1	1	1	1	1	1	1	1	1	1	1	1	1	1	1	1	1	1	1	1	1	1	1	1	1	1
AX-147247308	Araip.B04	17708672	0	0	2	2	2	1	1	1	1	1	1	1	1	1	1	1	1	1	1	1	1	1	1	1	1	1	1	1	1	1	1	1	1	1	1	1	1	1	1	1	1	1
AX-147247384	Araip.B04	21214259	0	0	2	2	2	1	1	1	1	1	1	1	1	1	1	1	1	1	1	1	1	1	1	1	1	1	1	1	1	1	1	1	1	1	1	1	1	1	1	1	1	1
AX-147247470	Araip.B04	114068571	2	2	0	0	0	1	1	1	1	1	1	1	1	1	1	1	1	1	1	1	1	1	1	1	1	1	1	1	1	1	1	1	1	1	1	1	1	1	1	1	1	1
AX-147247608	Araip.B04	45427653	0	0	2	2	2	1	1	1	1	1	1	1	1	1	1	1	1	1	1	1	1	1	1	1	1	1	1	1	1	1	1	1	1	1	1	1	1	1	1	1	1	1
AX-147247867	Araip.B04	101149286	0	0	2	2	2	1	1	1	1	1	1	1	1	1	1	1	1	1	1	1	1	1	1	1	1	1	1	1	1	1	1	1	1	1	1	1	1	1	1	1	1	1
AX-147248087	Araip.B04	117426900	2	2	0	0	0	1	1	1	1	1	1	1	1	1	1	1	1	1	1	1	1	1	1	1	1	1	1	1	1	1	1	1	1	1	1	1	1	1	1	1	1	1
AX-147248088	Araip.B04	127173580	2	2	0	0	0	1	1	1	1	1	1	1	1	1	1	1	1	1	1	1	1	1	1	1	1	1	1	1	1	1	1	1	1	1	1	1	1	1	1	1	1	1
AX-147248233	Araip.B04	127863102	2	2	0	0	0	1	1	1	1	1	1	1	1	1	1	1	1	1	1	1	1	1	1	1	1	1	1	1	1	1	1	1	1	1	1	1	1	1	1	1	1	1
AX-147248467	Araip.B04	125216296	0	0	2	2	2	1	1	1	1	1	1	1	1	1	1	1	1	1	1	1	1	1	1	1	1	1	1	1	1	1	1	1	1	1	1	1	1	1	1	1	1	1
AX-147248553	Araip.B04	127082240	0	0	2	2	2	1	1	1	1	1	1	1	1	1	1	1	1	1	1	1	1	1	1	1	1	1	1	1	1	1	1	1	1	1	1	1	1	1	1	1	1	1
AX-147248560	Araip.B04	128103072	2	2	0	0	0	1	1	1	1	1	1	1	1	1	1	1	1	1	1	1	1	1	1	1	1	1	1	1	1	1	1	1	1	1	1	1	1	1	1	1	1	1
AX-147248581	Araip.B04	129988623	2	2	0	0	0	1	1	1	1	1	1	1	1	1	1	1	1	1	1	1	1	1	1	1	1	1	1	1	1	1	1	1	1	1	1	1	1	1	1	1	1	1
AX-147248588	Araip.B04	128032906	0	0	2	2	2	1	1	1	1	1	1	1	1	1	1	1	1	1	1	1	1	1	1	1	1	1	1	1	1	1	1	1	1	1	1	1	1	1	1	1	1	1
AX-147248597	Araip.B04	130856189	2	2	0	0	0	1	1	1	1	1	1	1	1	1	1	1	1	1	1	1	1	1	1	1	1	1	1	1	1	1	1	1	1	1	1	1	1	1	1	1	1	1
AX-147248716	Araip.B04	129826828	0	0	2	2	2	1	1	1	1	1	1	1	1	1	1	1	1	1	1	1	1	1	1	1	1	1	1	1	1	1	1	1	1	1	1	1	1	1	1	1	1	1
AX-147248729	Araip.B04	131009789	2	2	0	0	0	1	1	1	1	1	1	1	1	1	1	1	1	1	1	1	1	1	1	1	1	1	1	1	1	1	1	1	1	1	1	1	1	1	1	1	1	1
AX-147248787	Araip.B04	131264463	2	2	0	0	0	1	1	1	1	1	1	1	1	1	1	1	1	1	1	1	1	1	1	1	1	1	1	1	1	1	1	1	1	1	1	1	1	1	1	1	1	1
AX-147248816	Araip.B04	131269877	2	2	0	0	0	1	1	1	1	1	1	1	1	1	1	1	1	1	1	1	1	1	1	1	1	1	1	1	1	1	1	1	1	1	1	1	1	1	1	1	1	1
AX-147248831	Araip.B05	3004178	2	2	0	0	0	1	1	1	1	1	1	1	1	1	1	1	1	1	1	1	1	1	1	1	1	1	1	1	1	1	1	1	1	1	1	1	1	1	1	1	1	1
AX-147248835	Araip.B04	131287386	0	0	2	2	2	1	1	1	1	1	1	1	1	1	1	1	1	1	1	1	1	1	1	1	1	1	1	1	1	1	1	1	1	1	1	1	1	1	1	1	1	1
AX-147248850	Araip.B05	7739428	2	2	0	0	0	1	1	1	1	1	1	1	1	1	1	1	1	1	1	1	1	1	1	1	1	1	1	1	1	1	1	1	1	1	1	1	1	1	1	1	1	1
AX-147248986	Araip.B05	7741499	2	2	0	0	0	1	1	1	1	1	1	1	1	1	1	1	1	1	1	1	1	1	1	1	1	1	1	1	1	1	1	1	1	1	1	1	1	1	1	1	1	1
AX-147249102	Araip.B05	20304471	2	2	0	0	0	1	1	1	1	1	1	1	1	1	1	1	1	1	1	1	1	1	1	1	1	1	1	1	1	1	1	1	1	1	1	1	1	1	1	1	1	1
AX-147249180	Araip.B05	10204013	0	0	2	2	2	1	1	1	1	1	1	1	1	1	1	1	1	1	1	1	1	1	1	1	1	1	1	1	1	1	1	1	1	1	1	1	1	1	1	1	1	1
AX-147249549	Araip.B05	125217700	2	2	0	0	0	1	1	1	1	1	1	1	1	1	1	1	1	1	1	1	1	1	1	1	1	1	1	1	1	1	1	1	1	1	1	1	1	1	1	1	1	1
AX-147249666	Araip.B05	24139951	0	0	2	2	2	1	1	1	1	1	1	1	1	1	1	1	1	1	1	1	1	1	1	1	1	1	1	1	1	1	1	1	1	1	1	1	1	1	1	1	1	1
AX-147249899	Araip.B05	44899614	0	NoCall	2	2	2	1	1	1	1	1	1	1	1	1	1	1	1	1	1	1	1	1	1	1	1	1	1	1	1	1	1	1	1	1	1	1	1	1	1	1	1	1
AX-147250106	Araip.B05	134080897	2	2	0	0	0	1	1	1	1	1	1	1	1	1	1	1	1	1	1	1	1	1	1	1	1	1	1	1	1	1	1	1	1	1	1	1	1	1	1	1	1	1
AX-147250379	Araip.B05	142756857	2	2	0	0	0	1	1	1	1	1	1	1	1	1	1	1	1	1	1	1	1	1	1	1	1	1	1	1	1	1	1	1	1	1	1	1	1	1	1	1	1	1
AX-147251301	Araip.B05	147877555	0	0	2	2	2	1	1	1	1	1	1	1	1	1	1	1	1	1	1	1	1	1	1	1	1	1	1	1	1	1	1	1	1	1	1	1	1	1	1	1	1	1
AX-147251615	Araip.B06	1357600	0	0	2	2	2	1	1	1	1	1	1	1	1	1	1	1	1	1	1	1	1	1	1	1	1	1	1	1	1	1	1	1	1	1	1	1	1	1	1	1	1	1
AX-147251776	Araip.B06	3392642	0	0	2	2	2	1	1	1	1	1	1	1	1	1	1	1	1	1	1	1	1	1	1	1	1	1	1	1	1	1	1	1	1	1	1	1	1	1	1	1	1	1
AX-147252333	Araip.B06	20366548	2	2	0	0	0	1	1	1	1	1	1	1	1	1	1	1	1	1	1	1	1	1	1	1	1	1	1	1	1	1	1	1	1	1	1	1	1	1	1	1	1	1
AX-147252515	Araip.B06	122512328	2	2	0	0	0	1	1	1	1	1	1	1	1	1	1	1	1	1	1	1	1	1	1	1	1	1	1	1	1	1	1	1	1	1	1	1	1	1	1	1	1	1
AX-147253130	Araip.B06	107605571	0	0	2	2	2	1	1	1	1	1	1	1	1	1	1	1	1	1	1	1	1	1	1	1	1	1	1	1	1	1	1	1	1	1	1	1	1	1	1	1	1	1
AX-147254029	Araip.B06	133149755	0	0	2	2	2	1	1	1	1	1	1	1	1	1	1	0	1	1	1	1	1	1	1	1	1	1	1	1	1	1	1	1	1	1	1	1	1	1	1	1	1	1
AX-147254245	Araip.B07	4464714	2	2	0	0	0	1	1	1	1	1	1	1	1	1	1	1	1	1	1	1	1	1	1	1	1	1	1	1	1	1	1	1	1	1	1	1	1	1	1	1	1	1
AX-147254247	Araip.B06	135803908	0	0	2	2	2	1	1	1	1	1	1	1	1	1	1	1	1	1	1	1	1	1	1	1	1	1	1	1	1	1	1	1	1	1	1	1	1	1	1	1	1	1
AX-147254310	Araip.B07	6511005	2	2	0	0	0	1	1	1	1	1	1	1	1	1	1	1	1	1	1	1	1	1	1	1	1	1	1	1	1	1	1	1	1	1	1	1	1	1	1	1	1	1
AX-147254565	Araip.B07	3013389	0	0	2	2	2	1	1	1	1	1	1	1	1	1	1	1	1	1	1	1	1	1	1	1	1	1	1	1	1	1	1	1	1	1	1	1	1	1	1	1	1	1
AX-147254619	Araip.B07	3660082	0	0	2	2	2	1	1	1	1	1	1	1	1	1	1	1	1	1	1	1	1	1	1	1	1	1	1	1	1	1	1	1	1	1	1	1	1	1	1	1	1	1
AX-147254640	Araip.B07	3982377	0	0	2	2	2	1	1	1	1	1	1	1	1	1	1	1	1	1	1	1	1	1	1	1	1	1	1	1	1	1	1	1	1	1	1	1	1	1	1	1	1	1
AX-147254833	Araip.B07	21968646	2	2	0	0	0	1	1	1	1	1	1	1	1	1	1	1	1	1	1	1	1	1	1	1	1	1	1	1	1	1	1	1	1	1	1	1	1	1	1	1	1	1
AX-147254959	Araip.B07	10208567	0	0	2	2	2	1	1	1	1	1	1	1	1	1	1	1	1	1	1	1	1	1	1	1	1	1	1	1	1	1	1	1	1	1	1	1	1	1	1	1	1	1
AX-147255025	Araip.B07	11796265	0	0	2	2	2	1	1	1	1	1	1	1	1	1	1	1	1	1	1	1	1	1	1	1	1	1	1	1	1	1	1	1	1	1	1	1	1	1	1	1	1	1
AX-147255079	Araip.B07	13341119	0	0	2	2	2	1	1	1	1	1	1	1	1	1	1	1	1	1	1	1	1	1	1	1	1	1	1	1	1	1	1	1	1	1	1	1	1	1	1	1	1	1
AX-147255126	Araip.B07	62509951	2	2	0	0	0	1	1	1	1	1	1	1	1	1	1	1	1	1	1	1	1	1	1	1	1	1	1	1	1	1	1	1	1	1	1	1	1	1	1	1	1	1
AX-147255401	Araip.B07	26952222	0	0	2	2	2	1	1	1	1	1	1	1	1	1	1	1	1	1	1	1	1	1	1	1	1	1	1	1	1	1	1	1	1	1	1	1	1	1	1	1	1	1
AX-147255528	Araip.B07	32192118	0	0	2	2	2	1	1	1	1	1	1	1	1	1	1	1	1	1	1	1	1	1	1	1	1	1	1	1	1	1	1	1	1	1	1	1	1	1	1	1	1	1
AX-147255577	Araip.B07	35118007	2	2	0	0	0	1	1	1	1	1	1	1	1	1	1	1	1	1	1	1	1	1	1	1	1	1	1	1	1	1	1	1	1	1	1	1	1	1	1	1	1	1
AX-147255797	Araip.B07	88779058	2	2	0	0	0	1	1	1	1	1	1	1	1	1	1	1	1	1	1	1	1	1	1	1	1	1	1	1	1	1	1	1	1	1	1	1	1	1	1	1	1	1
AX-147255803	Araip.B07	88780846	2	2	0	0	0	1	1	1	1	1	1	1	1	1	1	1	1	1	1	1	1	1	1	1	1	1	1	1	1	1	1	1	1	1	1	1	1	1	1	1	1	1
AX-147255894	Araip.B07	96201026	2	2	0	0	0	1	1	1	1	1	1	1	1	1	1	1	1	1	1	1	1	1	1	1	1	1	1	1	1	1	1	1	1	1	1	1	1	1	1	1	1	1
AX-147255896	Araip.B07	102224525	2	2	0	0	0	1	1	1	1	1	1	1	1	1	1	1	1	1	1	1	1	1	1	1	1	1	1	1	1	1	1	1	1	1	1	1	1	1	1	1	1	1
AX-147255908	Araip.B07	92393377	0	0	2	2	2	1	1	1	1	1	1	1	1	1	1	1	1	1	1	1	1	1	1	1	1	1	1	1	1	1	1	1	1	1	1	1	1	1	1	1	1	1
AX-147256000	Araip.B07	108369053	2	2	0	0	0	1	1	1	1	1	1	1	1	1	1	1	1	1	1	1	1	1	1	1	1	1	1	1	1	1	1	1	1	1	1	1	1	1	1	1	1	1
AX-147256004	Araip.B07	102230961	0	0	2	2	2	1	1	1	1	1	1	1	1	1	1	1	1	1	1	1	1	1	1	1	1	1	1	1	1	1	1	1	1	1	1	1	1	1	1	1	1	1
AX-147256030	Araip.B07	110660046	2	2	0	0	0	1	1	1	1	1	1	1	1	1	1	1	1	1	1	1	1	1	1	1	1	1	1	1	1	1	1	1	1	1	1	1	1	1	1	1	1	1
AX-147256132	Araip.B07	108039163	0	0	2	2	2	1	1	1	1	1	1	1	1	1	1	1	1	1	1	1	1	1	1	1	1	1	1	1	1	1	1	1	1	1	1	1	1	1	1	1	1	1
AX-147256137	Araip.B07	112749915	2	2	0	0	0	1	1	1	1	1	1	1	1	1	1	1	1	1	1	1	1	1	1	1	1	1	1	1	1	1	1	1	1	1	1	1	1	1	1	1	1	1
AX-147256184	Araip.B07	110658103	0	0	2	2	2	1	1	1	1	1	1	1	1	1	1	1	1	1	1	1	1	1	1	1	1	1	1	1	1	1	1	1	1	1	1	1	1	1	1	1	1	1
AX-147256189	Araip.B07	113185005	2	2	0	0	0	1	1	1	1	1	1	1	1	1	1	1	1	1	1	1	1	1	1	1	1	1	1	1	1	1	1	1	1	1	1	1	1	1	1	1	1	1
AX-147256211	Araip.B07	111530526	0	0	2	2	2	1	1	1	1	1	1	1	1	1	1	1	1	1	1	1	1	1	1	1	1	1	1	1	1	1	1	1	1	1	1	1	1	1	1	1	1	1
AX-147256217	Araip.B07	111628629	0	0	2	2	2	1	1	1	1	1	1	1	1	1	1	1	1	1	1	1	1	1	1	1	1	1	1	1	1	1	1	1	1	1	1	1	1	1	1	1	1	1
AX-147256220	Araip.B07	111662517	0	0	2	2	2	1	1	1	1	1	1	1	1	1	1	1	1	1	1	1	1	1	1	1	1	1	1	1	1	1	1	1	1	1	1	1	1	1	1	1	1	1
AX-147256271	Araip.B07	117653400	2	2	0	0	0	1	1	1	1	1	1	1	1	1	1	1	1	1	1	1	1	1	1	1	1	1	1	1	1	1	1	1	1	1	1	1	1	1	1	1	1	1
AX-147256296	Araip.B07	123238596	2	2	0	0	0	1	1	1	1	1	1	1	1	1	1	1	1	1	1	1	1	1	1	1	1	1	1	1	1	1	1	1	1	1	1	1	1	1	1	1	1	1
AX-147256444	Araip.B07	123613621	2	2	0	0	0	1	1	1	1	1	1	1	1	1	1	1	1	1	1	1	1	1	1	1	1	1	1	1	1	1	1	1	1	1	1	1	1	1	1	1	1	1
AX-147256720	Araip.B07	124808616	2	2	0	0	0	1	1	1	1	1	1	1	1	1	1	1	1	1	1	1	1	1	1	1	1	1	1	1	1	1	1	1	1	1	1	1	1	1	1	1	1	1
AX-147256749	Araip.B07	125854101	2	2	0	0	0	1	1	1	1	1	1	1	1	1	1	1	1	1	1	1	1	1	1	1	1	1	1	1	1	1	1	1	1	1	1	1	1	1	1	1	1	1
AX-147256832	Araip.B08	2885349	2	2	0	0	0	1	1	1	1	1	1	1	1	1	1	1	1	1	1	1	1	1	1	1	1	1	1	1	1	1	1	1	1	1	1	1	1	1	1	1	1	1
AX-147257056	Araip.B08	110962412	2	2	0	0	0	1	1	1	1	1	1	1	1	1	1	1	1	1	1	1	1	1	1	1	1	1	1	1	1	1	1	1	1	1	1	1	1	1	1	1	1	1
AX-147257223	Araip.B08	20587760	2	2	0	0	0	1	1	1	1	1	1	1	1	1	1	1	1	1	1	1	1	1	1	1	1	1	1	1	1	1	1	1	1	1	1	1	1	1	1	1	1	1
AX-147257389	Araip.B08	5070815	0	0	2	2	2	1	1	1	1	1	1	1	1	1	1	1	1	1	1	1	1	1	1	1	1	1	1	1	1	1	1	1	1	1	1	1	1	1	1	1	1	1
AX-147257529	Araip.B08	7574006	2	2	0	0	0	1	1	1	1	1	1	1	1	1	1	1	1	1	1	1	1	1	1	1	1	1	1	1	1	1	1	1	1	1	1	1	1	1	1	1	1	1
AX-147257587	Araip.B08	9013170	0	0	2	2	2	1	1	1	1	1	1	1	1	1	1	1	1	1	1	1	1	1	1	1	1	1	1	1	1	1	1	1	1	1	1	1	1	1	1	1	1	1
AX-147257908	Araip.B08	46901967	2	2	0	0	0	1	1	1	1	1	1	1	1	1	1	1	1	1	1	1	1	1	1	1	1	1	1	1	1	1	1	1	1	1	1	1	1	1	1	1	1	1
AX-147258013	Araip.B08	70459502	2	2	0	0	0	1	1	1	1	1	1	1	1	1	1	1	1	1	1	1	1	1	1	1	1	1	1	1	1	1	1	1	1	1	1	1	1	1	1	1	1	1
AX-147258189	Araip.B08	35016844	0	0	2	2	2	1	1	1	1	1	1	1	1	1	1	1	1	1	1	1	1	1	1	1	1	1	1	1	1	1	1	1	1	1	1	1	1	1	1	1	1	1
AX-147258209	Araip.B08	36847177	0	0	2	2	2	1	1	1	1	1	1	1	1	1	1	1	1	1	1	1	1	1	1	1	1	1	1	1	1	1	1	1	1	1	1	1	1	1	1	1	1	1
AX-147258311	Araip.B08	118273742	2	2	0	0	0	1	1	1	1	1	1	1	1	1	1	1	1	1	1	1	1	1	1	1	1	1	1	1	1	1	1	1	1	1	1	1	1	1	1	1	1	1
AX-147258379	Araip.B08	69871347	0	0	2	2	2	1	1	1	1	1	1	1	1	1	1	1	1	1	1	1	1	1	1	1	1	1	1	1	1	1	1	1	1	1	1	1	1	1	1	1	1	1
AX-147258393	Araip.B08	121205883	2	2	0	0	0	1	1	1	1	1	1	1	1	1	1	1	1	1	1	1	1	1	1	1	1	1	1	1	1	1	1	1	1	1	1	1	1	1	1	1	1	1
AX-147258419	Araip.B08	75951938	0	0	2	2	2	1	1	1	1	1	1	1	1	1	1	1	1	1	1	1	1	1	1	1	1	1	1	1	1	1	1	1	1	1	1	1	1	1	1	1	1	1
AX-147258716	Araip.B09	14820793	2	2	0	0	0	1	1	1	1	1	1	1	1	1	1	1	1	1	1	1	1	1	1	1	1	1	1	1	1	1	1	1	1	1	1	1	1	1	1	1	1	1
AX-147258824	Araip.B08	112087048	0	0	2	2	2	1	1	1	1	1	1	1	1	1	1	1	1	1	1	1	1	1	1	1	1	1	1	1	1	1	1	1	1	1	1	1	1	1	1	1	1	1
AX-147258966	Araip.B08	117097599	0	0	2	2	2	1	1	1	1	1	1	1	1	1	1	1	1	1	1	1	1	1	1	1	1	1	1	1	1	1	1	1	1	1	1	1	1	1	1	1	1	1
AX-147259140	Araip.B09	2027972	2	2	0	0	0	1	1	1	1	1	1	1	1	1	1	1	1	1	1	1	1	1	1	1	1	1	1	1	1	1	1	1	1	1	1	1	1	1	1	1	1	1
AX-147259171	Araip.B09	11262217	2	2	0	0	0	1	1	1	1	1	1	1	1	1	1	1	1	1	1	1	1	1	1	1	1	1	1	1	1	1	1	1	1	1	1	1	1	1	1	1	1	1
AX-147259217	Araip.B09	2285867	2	2	0	0	0	1	1	1	1	1	1	1	1	1	1	1	1	1	1	1	1	1	1	1	1	1	1	1	1	1	1	1	1	1	1	1	1	1	1	1	1	1
AX-147259397	Araip.B08	126651083	0	0	2	2	2	1	1	1	1	1	1	1	1	1	1	1	1	1	1	1	1	1	1	1	1	1	1	1	1	1	1	1	1	1	1	1	1	1	1	1	1	1
AX-147259513	Araip.B08	128560993	0	0	2	2	2	1	1	1	1	1	1	1	1	1	1	1	1	1	1	1	1	1	1	1	1	1	1	1	1	1	1	1	1	1	1	1	1	1	1	1	1	1
AX-147259729	Araip.B09	1949290	0	0	2	2	2	1	1	1	1	1	1	1	1	1	1	1	1	1	1	1	1	1	1	1	1	1	1	1	1	1	1	1	1	1	1	1	1	1	1	1	1	1
AX-147259743	Araip.B09	10929184	2	2	0	0	0	1	1	1	1	1	1	1	1	1	1	1	1	1	1	1	1	1	1	1	1	1	1	1	1	1	1	1	1	1	1	1	1	1	1	1	1	1
AX-147259762	Araip.B09	11209965	2	2	0	0	0	1	1	1	1	1	1	1	1	1	1	1	1	1	1	1	1	1	1	1	1	1	1	1	1	1	1	1	1	1	1	1	1	1	1	1	1	1
AX-147260240	Araip.B09	10913492	0	0	2	2	2	1	1	1	1	1	1	1	1	1	1	1	1	1	1	1	1	1	1	1	1	1	1	1	1	1	1	1	1	1	1	1	1	1	1	1	1	1
AX-147260246	Araip.B09	11478261	2	2	0	0	0	1	1	1	1	1	1	1	1	1	1	1	1	1	1	1	1	1	1	1	1	1	1	1	1	1	1	1	1	1	1	1	1	1	1	1	1	1
AX-147260266	Araip.B09	11084685	0	0	2	2	2	1	1	1	1	1	1	1	1	1	1	1	1	1	1	1	1	1	1	1	1	1	1	1	1	1	1	1	1	1	1	1	1	1	1	1	1	1
AX-147260275	Araip.B09	11743279	2	2	0	0	0	1	1	1	1	1	1	1	1	1	1	1	1	1	1	1	1	1	1	1	1	1	1	1	1	1	1	1	1	1	1	1	1	1	1	1	1	1
AX-147260310	Araip.B09	20788261	2	2	0	0	0	1	1	1	1	1	1	1	1	1	1	1	1	1	1	1	1	1	1	1	1	1	1	1	1	1	1	1	1	1	1	1	1	1	1	1	1	1
AX-147260327	Araip.B09	11595267	0	0	2	2	2	1	1	1	1	1	1	1	1	1	1	1	1	1	1	1	1	1	1	1	1	1	1	1	1	1	1	1	1	1	1	1	1	1	1	1	1	1
AX-147260354	Araip.B09	11737699	0	0	2	2	2	1	1	1	1	1	1	1	1	1	1	1	1	1	1	1	1	1	1	1	1	1	1	1	1	1	1	1	1	1	1	1	1	1	1	1	1	1
AX-147260356	Araip.B09	47208108	2	2	0	0	0	1	1	1	1	1	1	1	1	1	1	1	1	1	1	1	1	1	1	1	1	1	1	1	1	1	1	1	1	1	1	1	1	1	1	1	1	1
AX-147260399	Araip.B09	12162151	0	0	2	2	2	1	1	1	1	1	1	1	1	1	1	1	1	1	1	1	1	1	1	1	1	1	1	1	1	1	1	1	1	1	1	1	1	1	1	1	1	1
AX-147260644	Araip.B09	19338139	0	0	2	2	2	1	1	1	1	1	1	1	1	1	1	1	1	1	1	1	1	1	1	1	1	1	1	1	1	1	1	1	1	1	1	1	1	1	1	1	1	1
AX-147261250	Araip.B09	88853461	2	2	0	0	0	1	1	1	1	1	1	1	1	1	1	1	1	1	1	1	1	1	1	1	1	1	1	1	1	1	1	1	1	1	1	1	1	1	1	1	1	1
AX-147261630	Araip.B09	125207634	0	0	2	2	2	1	1	1	1	1	1	1	1	1	1	1	1	1	1	1	1	1	1	1	1	1	1	1	1	1	1	1	1	1	1	1	1	1	1	1	1	1
AX-147261883	Araip.B09	136170879	0	0	2	2	2	1	1	1	1	1	1	1	1	1	1	1	1	1	1	1	1	1	1	1	1	1	1	1	1	1	1	1	1	1	1	1	1	1	1	1	1	1
AX-147262126	Araip.B10	9363411	2	2	0	0	0	1	1	1	1	1	1	1	1	1	1	1	1	1	1	1	1	1	1	1	1	1	1	1	1	1	1	1	1	1	1	1	1	1	1	1	1	1
AX-147262156	Araip.B09	141185449	0	0	2	2	2	1	1	1	1	1	1	1	1	1	1	1	1	1	1	1	1	1	1	1	1	1	1	1	1	1	1	1	1	1	1	1	1	1	1	1	1	1
AX-147262266	Araip.B09	142497191	0	0	2	2	2	1	1	1	1	1	1	1	1	1	1	1	1	1	1	1	1	1	1	1	1	1	1	1	1	1	1	1	1	1	1	1	1	1	1	1	1	1
AX-147262307	Araip.B09	143011574	0	0	2	2	2	1	1	1	1	1	1	1	1	1	1	1	1	1	1	1	1	1	1	1	1	1	1	1	1	1	1	1	1	1	1	1	1	1	1	1	1	1
AX-147262318	Araip.B09	143177011	NoCall	1	2	2	2	1	1	1	1	1	1	1	1	1	1	1	1	1	1	1	1	1	1	1	1	1	1	1	1	1	1	1	1	1	1	1	1	1	1	1	1	1
AX-147262544	Araip.B09	145069267	0	0	2	2	2	1	1	1	1	1	1	1	1	1	1	1	1	1	1	1	1	1	1	1	1	1	1	1	1	1	1	1	1	1	1	1	1	1	1	1	1	1
AX-147262667	Araip.B09	146494985	0	0	2	2	2	1	1	1	1	1	1	1	1	1	1	1	1	1	1	1	1	1	1	1	1	1	1	1	1	1	1	1	1	1	1	1	1	1	1	1	1	1
AX-147262841	Araip.B10	4484816	2	2	0	0	0	1	1	1	1	1	1	1	1	1	1	1	1	1	1	1	1	1	1	1	1	1	1	1	1	1	1	1	1	1	1	1	1	1	1	1	1	1
AX-147262937	Araip.B10	131770203	2	2	0	0	0	1	1	1	1	1	1	1	1	1	1	1	1	1	1	1	1	1	1	1	1	1	1	1	1	1	1	1	1	1	1	1	1	1	1	1	1	1
AX-147263165	Araip.B10	5271431	2	2	0	0	0	1	1	1	1	1	1	1	1	1	1	1	1	1	1	1	1	1	1	1	1	1	1	1	1	1	1	1	1	1	1	1	1	1	1	1	1	1
AX-147263166	Araip.B10	9604705	2	2	0	0	0	1	1	1	1	1	1	1	1	1	1	1	1	1	1	1	1	1	1	1	1	1	1	1	1	1	1	1	1	1	1	1	1	1	1	1	1	1
AX-147263205	Araip.B10	10963057	2	2	0	0	0	1	1	1	1	1	1	1	1	1	1	1	1	1	1	1	1	1	1	1	1	1	1	1	1	1	1	1	1	1	1	1	1	1	1	1	1	1
AX-147263278	Araip.B10	7003204	0	0	2	2	2	1	1	1	1	1	1	1	1	1	1	1	1	1	1	1	1	1	1	1	1	1	1	1	1	1	1	1	1	1	1	1	1	1	1	1	1	1
AX-147263369	Araip.B10	37238142	2	2	0	0	0	1	1	1	1	1	1	1	1	1	1	1	1	1	1	1	1	1	1	1	1	1	1	1	1	1	1	1	1	1	1	1	1	1	1	1	1	1
AX-147263470	Araip.B10	53036225	2	2	0	0	0	1	1	1	1	1	1	1	1	1	1	1	1	1	1	1	1	1	1	1	1	1	1	1	1	1	1	1	1	1	1	1	1	1	1	1	1	1
AX-147263590	Araip.B10	14409355	0	0	2	2	2	1	1	1	1	1	1	1	1	1	1	1	1	1	1	1	1	1	1	1	1	1	1	1	1	1	1	1	1	1	1	1	1	1	1	1	1	1
AX-147263869	Araip.B10	30278236	0	0	2	2	2	1	1	1	1	1	1	1	1	1	1	1	1	1	1	1	1	1	1	1	1	1	1	1	1	1	1	1	1	1	1	1	1	1	1	1	1	1
AX-147263946	Araip.B10	94875006	2	2	0	0	0	1	1	1	1	1	1	1	1	1	1	1	1	1	1	1	1	1	1	1	1	1	1	1	1	1	1	1	1	1	1	1	1	1	1	1	1	1
AX-147264023	Araip.B10	48729302	0	0	2	2	2	1	1	1	1	1	1	1	1	1	1	1	1	1	1	1	1	1	1	1	1	1	1	1	1	1	1	1	1	1	1	1	1	1	1	1	1	1
AX-147264067	Araip.B10	60642224	0	0	2	2	2	1	1	1	1	1	1	1	1	1	1	1	1	1	1	1	1	1	1	1	1	1	1	1	1	1	1	1	1	1	1	1	1	1	1	1	1	1
AX-147264109	Araip.B10	89615533	0	0	2	2	2	1	1	1	1	1	1	1	1	1	1	1	1	1	1	1	1	1	1	1	1	1	1	1	1	1	1	1	1	1	1	1	1	1	1	1	1	1
AX-147264116	Araip.B10	89778962	0	0	2	2	2	1	1	1	1	1	1	1	1	1	1	1	1	1	1	1	1	1	1	1	1	1	1	1	1	1	1	1	1	1	1	1	1	1	1	1	1	1
AX-147264144	Araip.B07	110319221	2	2	0	0	0	1	1	1	1	1	1	1	1	1	1	1	1	1	1	1	1	1	1	1	1	1	1	1	1	1	1	1	1	1	1	1	1	1	1	1	1	1
AX-147264409	Araip.B10	114666237	0	0	2	2	2	1	1	1	1	1	1	1	1	1	1	1	1	1	1	1	1	1	1	1	1	1	1	1	1	1	1	1	1	1	1	1	1	1	1	1	1	1
AX-147264596	Araip.B10	120828846	0	0	2	2	2	1	1	1	1	1	1	1	1	1	1	1	1	1	1	1	1	1	1	1	1	1	1	1	1	1	1	1	1	1	1	1	1	1	1	1	1	1
AX-147264906	Araip.B10	129993681	0	0	2	2	2	1	1	1	1	1	1	1	1	1	1	1	1	1	1	1	1	1	1	1	1	1	1	1	1	1	1	1	1	1	1	1	1	1	1	1	1	1
AX-147265333	Aradu.A04	120928690	2	2	0	0	0	1	1	1	1	1	1	1	1	1	1	1	1	1	1	1	1	1	1	1	1	1	1	1	1	1	1	1	1	1	1	1	1	1	1	1	1	1
AX-147265342	Araip.B02	101399937	2	2	0	0	0	1	1	1	1	1	1	1	1	1	1	1	1	1	1	1	1	1	1	1	1	1	1	1	1	1	1	1	1	1	1	1	1	1	1	1	1	1
AX-147265709	Aradu.A01	2360665	NoCall	0	2	2	2	1	1	1	1	1	1	1	1	1	1	1	1	1	1	1	1	1	1	1	1	1	1	1	1	1	1	1	1	1	1	1	1	1	1	1	1	1
AX-176791361	Araip.B07	111887501	0	0	2	2	2	1	1	1	1	1	1	1	1	1	1	1	1	1	1	1	1	1	1	1	1	1	1	1	1	1	1	1	1	1	1	1	1	1	1	1	1	1
AX-176791385	Araip.B06	24429699	2	2	0	0	0	1	1	1	1	1	1	1	1	1	1	1	1	1	1	1	1	1	1	1	1	1	1	1	1	1	1	1	1	1	1	1	1	1	1	1	1	1
AX-176791388	Aradu.A01	3120706	2	2	0	0	0	1	1	1	1	1	1	1	1	1	1	1	1	1	1	1	1	1	1	1	1	1	1	1	1	1	1	1	1	1	1	1	1	1	1	1	1	1
AX-176791443	Araip.B01	135986574	0	0	2	2	2	1	1	1	1	1	1	1	1	1	1	1	1	1	1	1	1	1	1	1	1	1	1	1	1	1	1	1	1	1	1	1	1	1	1	1	1	1
AX-176791445	Araip.B07	8795198	0	0	2	2	2	1	1	1	1	1	1	1	1	1	1	1	1	1	1	1	1	1	1	1	1	1	1	1	1	1	1	1	1	1	1	1	1	1	1	1	1	1
AX-176791467	Araip.B04	124614741	0	0	2	2	2	1	1	1	1	1	1	1	1	1	1	1	1	1	1	1	1	1	1	1	1	1	1	1	1	1	1	1	1	1	1	1	1	1	1	1	1	1
AX-176791527	Araip.B03	120040617	2	2	0	0	0	1	1	1	1	1	1	1	1	1	1	1	1	1	1	1	1	1	1	1	1	1	1	1	1	1	1	1	1	1	1	1	1	1	1	1	1	1
AX-176791583	Araip.B05	11059955	0	0	2	2	2	1	1	1	1	1	1	1	1	1	1	1	1	1	1	1	1	1	1	1	1	1	1	1	1	1	1	1	1	1	1	1	1	1	1	1	1	1
AX-176791595	Araip.B09	46524468	0	0	2	2	2	1	1	1	1	1	1	1	1	1	1	1	1	1	1	1	1	1	1	1	1	1	1	1	1	1	1	1	1	1	1	1	1	1	1	1	1	1
AX-176791605	Aradu.A09	112714052	2	2	0	0	0	1	1	1	1	1	1	1	1	1	1	1	1	1	1	1	1	1	1	1	1	1	1	1	1	1	1	1	1	1	1	1	1	1	1	1	1	1
AX-176791646	Aradu.A04	1002803	2	2	0	0	0	1	1	1	1	1	1	1	1	1	1	1	1	1	1	1	1	1	1	1	1	1	1	1	1	1	1	1	1	1	1	1	1	1	1	1	1	1
AX-176791706	Araip.B03	3777955	2	2	0	0	0	1	1	1	1	1	1	1	1	1	1	1	1	1	1	1	1	1	1	1	1	1	1	1	1	1	1	1	1	1	1	1	1	1	1	1	1	1
AX-176791715	Araip.B08	19050180	0	NoCall	2	2	2	1	1	1	1	1	1	1	1	1	1	1	1	1	1	1	1	1	1	1	1	1	1	1	1	1	1	1	1	1	1	1	1	1	1	1	1	1
AX-176791726	Aradu.A03	27345477	0	0	2	2	2	1	1	1	1	1	1	1	1	1	1	1	1	1	1	1	1	1	1	1	1	1	1	1	1	1	1	1	1	1	1	1	1	1	1	1	1	1
AX-176791744	Aradu.A08	33748428	0	0	2	2	2	1	1	1	1	1	1	1	1	1	1	1	1	1	1	1	1	1	1	1	1	1	1	1	1	1	1	1	1	1	1	1	1	1	1	1	1	1
AX-176791757	Aradu.A09	5401432	2	2	0	0	0	1	1	1	1	1	1	1	1	1	1	1	1	1	1	1	1	1	1	1	1	1	1	1	1	1	1	1	1	1	1	1	1	1	1	1	1	1
AX-176791826	Araip.B09	50808308	2	2	0	0	0	1	1	1	1	1	1	1	1	1	1	1	1	1	1	1	1	1	1	1	1	1	1	1	1	1	1	1	1	1	1	1	1	1	1	1	1	1
AX-176791860	Araip.B02	6696588	0	0	2	2	2	1	1	1	1	1	1	1	1	1	1	1	1	1	1	1	1	1	1	1	1	1	1	1	1	1	1	1	1	1	1	1	1	1	1	1	1	1
AX-176791871	Aradu.A10	80246821	0	0	2	2	2	1	1	1	1	1	1	1	1	1	1	1	1	1	1	1	1	1	1	1	1	1	1	1	1	1	1	1	1	1	1	1	1	1	1	1	1	1
AX-176791872	Araip.B01	5672434	2	2	0	0	0	1	1	1	1	1	1	1	1	1	1	1	1	1	1	1	1	1	1	1	1	1	1	1	1	1	1	1	1	1	1	1	1	1	1	1	1	1
AX-176791909	Aradu.A10	46609465	0	0	2	2	2	1	1	1	1	1	1	1	1	1	1	1	1	1	1	1	1	1	1	1	1	1	1	1	1	1	1	1	1	1	1	1	1	1	1	1	1	1
AX-176791911	Aradu.A07	1100684	0	0	2	2	2	1	1	1	1	1	1	1	1	1	1	1	1	1	1	1	1	1	1	1	1	1	1	1	1	1	1	1	1	1	1	1	1	1	1	1	1	1
AX-176791960	Araip.B09	12385370	0	0	2	2	2	1	1	1	1	1	1	1	1	1	1	1	1	1	1	1	1	1	1	1	1	1	1	1	1	1	1	1	1	1	1	1	1	1	1	1	1	1
AX-176791970	Aradu.A04	45017796	2	2	0	0	0	1	1	1	1	1	1	1	1	1	1	1	1	1	1	1	1	1	1	1	1	1	1	1	1	1	1	1	1	1	1	1	1	1	1	1	1	1
AX-176792002	Araip.B01	126006458	2	2	0	0	0	1	1	1	1	1	1	1	1	1	1	1	1	1	1	1	1	1	1	1	1	1	1	1	1	1	1	1	1	1	1	1	1	1	1	1	1	1
AX-176792018	Araip.B09	4072301	2	2	0	0	0	1	1	1	1	1	1	1	1	1	1	1	1	1	1	1	1	1	1	1	1	1	1	1	1	1	1	1	1	1	1	1	1	1	1	1	1	1
AX-176792024	Araip.B04	129295525	0	0	2	2	2	1	1	1	1	1	1	1	1	1	1	1	1	1	1	1	1	1	1	1	1	1	1	1	1	1	1	1	1	1	1	1	1	1	1	1	1	1
AX-176792042	Araip.B02	85835204	2	2	0	0	0	1	1	1	1	1	1	1	1	1	1	1	1	1	1	1	1	1	1	1	1	1	1	1	1	1	1	1	1	1	1	1	1	1	1	1	1	1
AX-176792076	Araip.B02	104393434	0	0	2	2	2	1	1	1	1	1	1	1	1	1	1	1	1	1	1	1	1	1	1	1	1	1	1	1	1	1	1	1	1	1	1	1	1	1	1	1	1	1
AX-176792089	Aradu.A02	809430	2	2	0	0	0	1	1	1	1	1	1	1	1	1	1	1	1	1	1	1	1	1	1	1	1	1	1	1	1	1	1	1	1	1	1	1	1	1	1	1	1	1
AX-176792103	Araip.B01	56608282	0	0	2	2	2	1	1	1	1	1	1	1	1	1	1	1	1	1	1	1	1	1	1	1	1	1	1	1	1	1	1	1	1	1	1	1	1	1	1	1	1	1
AX-176792115	Araip.B08	328153	2	2	0	0	0	1	1	1	1	1	1	1	1	1	1	1	1	1	1	1	1	1	1	1	1	1	1	1	1	1	1	1	1	1	1	1	1	1	1	1	1	1
AX-176792143	Araip.B07	102498863	0	0	2	2	2	1	1	1	1	1	1	1	1	1	1	1	1	1	1	1	1	1	1	1	1	1	1	1	1	1	1	1	1	1	1	1	1	1	1	1	1	1
AX-176792147	scaffold_694	209253	2	2	0	0	0	1	1	1	1	1	1	1	1	1	1	1	1	1	1	1	1	1	1	1	1	1	1	1	1	1	1	1	1	1	1	1	1	1	1	1	1	1
AX-176792183	Araip.B03	119445212	0	0	2	2	2	1	1	1	1	1	1	1	1	1	1	1	1	1	1	1	1	1	1	1	1	1	1	1	1	1	1	1	1	1	1	1	1	1	1	1	1	1
AX-176792184	Aradu.A10	106346357	2	2	0	0	0	1	1	1	1	1	1	1	1	1	1	1	1	1	1	1	1	1	1	1	1	1	1	1	1	1	1	1	1	1	1	1	1	1	1	1	1	1
AX-176792191	Aradu.A01	1144591	2	2	0	0	0	1	1	1	1	1	1	1	1	1	1	1	1	1	1	1	1	1	1	1	1	1	1	1	1	1	1	1	1	1	1	1	1	1	1	1	1	1
AX-176792195	Aradu.A10	99390693	2	2	0	0	0	1	1	1	1	1	1	1	1	1	1	1	1	1	1	1	1	1	1	1	1	1	1	1	1	1	1	1	1	1	1	1	1	1	1	1	1	1
AX-176792436	Aradu.A01	30248055	0	0	2	2	2	1	1	1	1	1	1	1	1	1	1	1	1	1	1	1	1	1	1	1	1	1	1	1	1	1	1	1	1	1	1	1	1	1	1	1	1	1
AX-176792509	scaffold_1747	185403	2	2	0	0	0	1	1	1	1	1	1	1	1	1	1	1	1	1	1	1	1	1	1	1	1	1	1	1	1	1	1	1	1	1	1	1	1	1	1	1	1	1
AX-176792555	Aradu.A01	104855229	2	2	0	0	0	1	1	1	1	1	1	1	1	1	1	1	1	1	1	1	1	1	1	1	1	1	1	1	1	1	1	1	1	1	1	1	1	1	1	1	1	1
AX-176792582	Aradu.A04	20549392	0	0	2	2	2	1	1	1	1	1	1	1	1	1	1	1	1	1	1	1	1	1	1	1	1	1	1	1	1	1	1	1	1	1	1	1	1	1	1	1	1	1
AX-176792584	Aradu.A03	87553102	0	0	2	2	2	1	1	1	1	1	1	1	1	1	1	1	1	1	1	1	1	1	1	1	1	1	1	1	1	1	1	1	1	1	1	1	1	1	1	1	1	1
AX-176792617	Araip.B08	126655697	0	0	2	2	2	1	1	1	1	1	1	1	1	1	1	1	1	1	1	1	1	1	1	1	1	1	1	1	1	1	1	1	1	1	1	1	1	1	1	1	1	1
AX-176792639	Araip.B01	134434638	0	0	2	2	2	1	1	1	1	1	1	1	1	1	1	1	1	1	1	1	1	1	1	1	1	1	1	1	1	1	1	1	1	1	1	1	1	1	1	1	1	1
AX-176792745	scaffold_2162	201607	0	0	2	2	2	1	1	1	1	1	1	1	1	1	1	1	1	1	1	1	1	1	1	1	1	1	1	1	1	1	1	1	1	1	1	1	1	1	1	1	1	1
AX-176792781	Aradu.A01	62697405	0	0	2	2	2	1	1	1	1	1	1	1	1	1	1	1	1	1	1	1	1	1	1	1	1	1	1	1	1	1	1	1	1	1	1	1	1	1	1	1	1	1
AX-176792933	Aradu.A04	112982843	2	2	0	0	0	1	1	1	1	1	1	1	1	1	1	1	1	1	1	1	1	1	1	1	1	1	1	1	1	1	1	1	1	1	1	1	1	1	1	1	1	1
AX-176793037	Araip.B06	9064003	0	0	2	2	2	1	1	1	1	1	1	1	1	1	1	1	1	1	1	1	1	1	1	1	1	1	1	1	1	1	1	1	1	1	1	1	1	1	1	1	1	1
AX-176793104	Araip.B05	20409379	0	0	2	2	2	1	1	1	1	1	1	1	1	1	1	1	1	1	1	1	1	1	1	1	1	1	1	1	1	1	1	1	1	1	1	1	1	1	1	1	1	1
AX-176793404	scaffold_4012	58958	0	0	2	2	2	1	1	1	1	1	1	1	1	1	1	1	1	1	1	1	1	1	1	1	1	1	1	1	1	1	1	1	1	1	1	1	1	1	1	1	1	1
AX-176793412	scaffold_3238	36401	0	0	2	2	2	1	1	1	1	1	1	1	1	1	1	1	1	1	1	1	1	1	1	1	1	1	1	1	1	1	1	1	1	1	1	1	1	1	1	1	1	1
AX-176793483	Araip.B04	31151177	0	0	2	2	2	1	1	1	1	1	1	1	1	1	1	1	1	1	1	1	1	1	1	1	1	1	1	1	1	1	1	1	1	1	1	1	1	1	1	1	1	1
AX-176793621	Araip.B04	30903906	0	0	2	2	2	1	1	1	1	1	1	1	1	1	1	1	1	1	1	1	1	1	1	1	1	1	1	1	1	1	1	1	1	1	1	1	1	1	1	1	1	1
AX-176793672	Aradu.A01	60239405	0	0	2	2	2	1	1	1	1	1	1	1	1	1	1	1	1	1	1	1	1	1	1	1	1	1	1	1	1	1	1	1	1	1	1	1	1	1	1	1	1	1
AX-176793700	Aradu.A04	73031842	2	2	0	0	0	1	1	1	1	1	1	1	1	1	1	1	1	1	1	1	1	1	1	1	1	1	1	1	1	1	1	1	1	1	1	1	1	1	1	1	1	1
AX-176793727	Aradu.A01	94163829	2	2	0	0	0	1	1	1	1	1	1	1	1	1	1	1	1	1	1	1	1	1	1	1	1	1	1	1	1	1	1	1	1	1	1	1	1	1	1	1	1	1
AX-176793734	Aradu.A06	106277622	0	0	2	2	2	1	1	1	1	1	1	1	1	1	1	1	1	1	1	1	1	1	1	1	1	1	1	1	1	1	1	1	1	1	1	1	1	1	1	1	1	1
AX-176793773	Araip.B04	8903986	0	0	2	2	2	1	1	1	1	1	1	1	1	1	1	1	1	1	1	1	1	1	1	1	1	1	1	1	1	1	1	1	1	1	1	1	1	1	1	1	1	1
AX-176793777	scaffold_16	1165843	0	0	2	2	2	1	1	1	1	1	1	1	1	1	1	1	1	1	1	1	1	1	1	1	1	1	1	1	1	1	1	1	1	1	1	1	1	1	1	1	1	1
AX-176793787	Araip.B04	109340206	0	0	2	2	2	1	1	1	1	1	1	1	1	1	1	1	1	1	1	1	1	1	1	1	1	1	1	1	1	1	1	1	1	1	1	1	1	1	1	1	1	1
AX-176794041	Aradu.A05	96464635	0	0	2	2	2	1	1	1	1	1	1	1	1	1	1	1	1	1	1	1	1	1	1	1	1	1	1	1	1	1	1	1	1	1	1	1	1	1	1	1	1	1
AX-176794435	Araip.B03	106617217	0	0	2	2	2	1	1	1	1	1	1	1	1	1	1	1	1	1	1	1	1	1	1	1	1	1	1	1	1	1	1	1	1	1	1	1	1	1	1	1	1	1
AX-176794442	Araip.B09	13151882	0	0	2	2	2	1	1	1	1	1	1	1	1	1	1	1	1	1	1	1	1	1	1	1	1	1	1	1	1	1	1	1	1	1	1	1	1	1	1	1	1	1
AX-176794473	Aradu.A01	50530941	0	0	2	2	2	1	1	1	1	1	1	1	1	1	1	1	1	1	1	1	1	1	1	1	1	1	1	1	1	1	1	1	1	1	1	1	1	1	1	1	1	1
AX-176794854	Araip.B02	4961254	0	0	2	2	2	1	1	1	1	1	1	1	1	1	1	1	1	1	1	1	1	1	1	1	1	1	1	1	1	1	1	1	1	1	1	1	1	1	1	1	1	1
AX-176794946	Aradu.A09	71895646	2	2	0	0	0	1	1	1	1	1	1	1	1	1	1	1	1	1	1	1	1	1	1	1	1	1	1	1	1	1	1	1	1	1	1	1	1	1	1	1	1	1
AX-176795009	Araip.B06	116087327	0	0	2	2	2	1	1	1	1	1	1	1	1	1	1	1	1	1	1	1	1	1	1	1	1	1	1	1	1	1	1	1	1	1	1	1	1	1	1	1	1	1
AX-176795191	Aradu.A01	4705643	0	0	2	2	2	1	1	1	1	1	1	1	1	1	1	1	1	1	1	1	1	1	1	1	1	1	1	1	1	1	1	1	1	1	1	1	1	1	1	1	1	1
AX-176795446	scaffold_815	108090	2	2	0	0	0	1	1	1	1	1	1	1	1	1	1	1	1	1	1	1	1	1	1	1	1	1	1	1	1	1	1	1	1	1	1	1	1	1	1	1	1	1
AX-176795537	Araip.B04	118082107	2	2	0	0	0	1	1	1	1	1	1	1	1	1	1	1	1	1	1	1	1	1	1	1	1	1	1	1	1	1	1	1	1	1	1	1	1	1	1	1	1	1
AX-176795735	Aradu.A07	65944976	0	0	2	2	2	1	1	1	1	1	1	1	1	1	1	1	1	1	1	1	1	1	1	1	1	1	1	1	1	1	1	1	1	1	1	1	1	1	1	1	1	1
AX-176795813	Araip.B01	21164322	0	0	2	2	2	1	1	1	1	1	1	1	1	1	1	1	1	1	1	1	1	1	1	1	1	1	1	1	1	1	1	1	1	1	1	1	1	1	1	1	1	1
AX-176795971	scaffold_1256	70520	0	0	2	2	2	1	1	1	1	1	1	1	1	1	1	1	1	1	1	1	1	1	1	1	1	1	1	1	1	1	1	1	1	1	1	1	1	1	1	1	1	1
AX-176796094	Aradu.A03	3676240	0	0	2	2	2	1	1	1	1	1	1	1	1	1	1	1	1	1	1	1	1	1	1	1	1	1	1	1	1	1	1	1	1	1	1	1	1	1	1	1	1	1
AX-176796131	Araip.B07	16598019	2	2	0	0	0	1	1	1	1	1	1	1	1	1	1	1	1	1	1	1	1	1	1	1	1	1	1	1	1	1	1	1	1	1	1	1	1	1	1	1	1	1
AX-176796291	Aradu.A02	52118991	0	0	2	2	2	1	1	1	1	1	1	1	1	1	1	1	1	1	1	1	1	1	1	1	1	1	1	1	1	1	1	1	1	1	1	1	1	1	1	1	1	1
AX-176796357	Aradu.A06	70869795	2	2	0	0	0	1	1	1	1	1	1	1	1	1	1	1	1	1	1	1	1	1	1	1	1	1	1	1	1	1	1	1	1	1	1	1	1	1	1	1	1	1
AX-176796489	Araip.B01	128165561	0	0	2	2	2	1	1	1	1	1	1	1	1	1	1	1	1	1	1	1	1	1	1	1	1	1	1	1	1	1	1	1	1	1	1	1	1	1	1	1	1	1
AX-176796644	Aradu.A04	120937329	2	2	0	0	0	1	1	1	1	1	1	1	1	1	1	1	1	1	1	1	1	1	1	1	1	1	1	1	1	1	1	1	1	1	1	1	1	1	1	1	1	1
AX-176797003	Aradu.A04	120932316	2	2	0	0	0	1	1	1	1	1	1	1	1	1	1	1	1	1	1	1	1	1	1	1	1	1	1	1	1	1	1	1	1	1	1	1	1	1	1	1	1	1
AX-176797243	scaffold_360	752077	NoCall	0	2	2	2	1	1	1	1	1	1	1	1	1	1	1	1	1	1	1	1	1	1	1	1	1	1	1	1	1	1	1	1	1	1	1	1	1	1	1	1	1
AX-176797303	scaffold_4367	53380	0	0	2	2	2	1	1	1	1	1	1	1	1	1	1	1	1	1	1	1	1	1	1	1	1	1	1	1	1	1	1	1	1	1	1	1	1	1	1	1	1	1
AX-176797495	Araip.B01	40169805	0	0	2	2	2	1	1	1	1	1	1	1	1	1	1	1	1	1	1	1	1	1	1	1	1	1	1	1	1	1	1	1	1	1	1	1	1	1	1	1	1	1
AX-176797867	scaffold_6041	50343	2	2	0	0	0	1	1	1	1	1	1	1	1	1	1	1	1	1	1	1	1	1	1	1	1	1	1	1	1	1	1	1	1	1	1	1	1	1	1	1	1	1
AX-176798217	Araip.B01	100784483	0	0	2	2	2	1	1	1	1	1	1	1	1	1	1	1	1	1	1	1	1	1	1	1	1	1	1	1	1	1	1	1	1	1	1	1	1	1	1	1	1	1
AX-176798326	Araip.B06	115582730	0	0	2	2	2	1	1	1	1	1	1	1	1	1	1	1	1	1	1	1	1	1	1	1	1	1	1	1	1	1	1	1	1	1	1	1	1	1	1	1	1	1
AX-176798362	scaffold_719	198921	0	0	2	2	2	1	1	1	1	1	1	1	1	1	1	1	1	1	1	1	1	1	1	1	1	1	1	1	1	1	1	1	1	1	1	1	1	1	1	1	1	1
AX-176798403	Aradu.A02	16559101	0	0	2	2	2	1	1	1	1	1	1	1	1	1	1	1	1	1	1	1	1	1	1	1	1	1	1	1	1	1	1	1	1	1	1	1	1	1	1	1	1	1
AX-176798418	Aradu.A01	43211604	0	0	2	2	2	1	1	1	1	1	1	1	1	1	1	1	1	1	1	1	1	1	1	1	1	1	1	1	1	1	1	1	1	1	1	1	1	1	1	1	1	1
AX-176798547	Aradu.A05	32212914	0	0	2	2	2	1	1	1	1	1	1	1	1	1	1	1	1	1	1	1	1	1	1	1	1	1	1	1	1	1	1	1	1	1	1	1	1	1	1	1	1	1
AX-176798630	Aradu.A02	43648781	2	2	0	0	0	1	1	1	1	1	1	1	1	1	1	1	1	1	1	1	1	1	1	1	1	1	1	1	1	1	1	1	1	1	1	1	1	1	1	1	1	1
AX-176798824	Aradu.A04	100054823	0	0	2	2	2	1	1	1	1	1	1	1	1	1	1	1	1	1	1	1	1	1	1	1	1	1	1	1	1	1	1	1	1	1	1	1	1	1	1	1	1	1
AX-176799339	Aradu.A03	116746717	0	0	2	2	2	1	1	1	1	1	1	1	1	1	1	1	1	1	1	1	1	1	1	1	1	1	1	1	1	1	1	1	1	1	1	1	1	1	1	1	1	1
AX-176799643	scaffold_762	125350	0	0	2	2	2	1	1	1	1	1	1	1	1	1	1	1	1	1	1	1	1	1	1	1	1	1	1	1	1	1	1	1	1	1	1	1	1	1	1	1	1	1
AX-176799657	Araip.B06	23897611	0	0	2	2	2	1	1	1	1	1	1	1	1	1	1	1	1	1	1	1	1	1	1	1	1	1	1	1	1	1	1	1	1	1	1	1	1	1	1	1	1	1
AX-176799696	Aradu.A04	102853198	0	0	2	2	2	1	1	1	1	1	1	1	1	1	1	1	1	1	1	1	1	1	1	1	1	1	1	1	1	1	1	1	1	1	1	1	1	1	1	1	1	1
AX-176800093	Aradu.A10	84842693	0	0	2	2	2	1	1	1	1	1	1	1	1	1	1	1	1	1	1	1	1	1	1	1	1	1	1	1	1	1	1	1	1	1	1	1	1	1	1	1	1	1
AX-176800098	Aradu.A01	89318205	0	0	2	2	2	1	1	1	1	1	1	1	1	1	1	1	1	1	1	1	1	1	1	1	1	1	1	1	1	1	1	1	1	1	1	1	1	1	1	1	1	1
AX-176800105	Aradu.A03	94610050	0	0	2	2	2	1	1	1	1	1	1	1	1	1	1	1	1	1	1	1	1	1	1	1	1	1	1	1	1	1	1	1	1	1	1	1	1	1	1	1	1	1
AX-176800303	Araip.B03	71966139	0	0	2	2	2	1	1	1	1	1	1	1	1	1	1	1	1	1	1	1	1	1	1	1	1	1	1	1	1	1	1	1	1	1	1	1	1	1	1	1	1	1
AX-176800388	Araip.B01	129549664	0	0	2	2	2	1	1	1	1	1	1	1	1	1	1	1	1	1	1	1	1	1	1	1	1	1	1	1	1	1	1	1	1	1	1	1	1	1	1	1	1	1
AX-176800519	scaffold_6	2021027	0	0	2	2	2	1	1	1	1	1	1	1	1	1	1	1	1	1	1	1	1	1	1	1	1	1	1	1	1	1	1	1	1	1	1	1	1	1	1	1	1	1
AX-176800599	Aradu.A05	108147829	2	2	0	0	0	1	1	1	1	1	1	1	1	1	1	1	1	1	1	1	1	1	1	1	1	1	1	1	1	1	1	1	1	1	1	1	1	1	1	1	1	1
AX-176800617	Araip.B03	30515392	0	0	2	2	2	1	1	1	1	1	1	1	1	1	1	1	1	1	1	1	1	1	1	1	1	1	1	1	1	1	1	1	1	1	1	1	1	1	1	1	1	1
AX-176800667	scaffold_412	638185	NoCall	0	2	2	2	1	1	1	1	1	1	1	1	1	1	1	1	1	1	1	1	1	1	1	1	1	1	1	1	1	1	1	1	1	1	1	1	1	1	1	1	1
AX-176800815	Araip.B09	114200282	0	0	2	2	2	1	1	1	1	1	1	1	1	1	1	1	1	1	1	1	1	1	1	1	1	1	1	1	1	1	1	1	1	1	1	1	1	1	1	1	1	1
AX-176800923	Aradu.A02	31474689	2	2	0	0	0	1	1	1	1	1	1	1	1	1	1	1	1	1	1	1	1	1	1	1	1	1	1	1	1	1	1	1	1	1	1	1	1	1	1	1	1	1
AX-176801212	Araip.B03	10589911	0	0	2	2	2	1	1	1	1	1	1	1	1	1	1	1	1	1	1	1	1	1	1	1	1	1	1	1	1	1	1	1	1	1	1	1	1	1	1	1	1	1
AX-176801258	Araip.B01	53419497	0	0	2	2	2	1	1	1	1	1	1	1	1	1	1	1	1	1	1	1	1	1	1	1	1	1	1	1	1	1	1	1	1	1	1	1	1	1	1	1	1	1
AX-176801371	Araip.B01	16024275	0	0	2	2	2	1	1	1	1	1	1	1	1	1	1	1	1	1	1	1	1	1	1	1	1	1	1	1	1	1	1	1	1	1	1	1	1	1	1	1	1	1
AX-176801426	Aradu.A03	16334240	2	2	0	0	0	1	1	1	1	1	1	1	1	1	1	1	1	1	1	1	1	1	1	1	1	1	1	1	1	1	1	1	1	1	1	1	1	1	1	1	1	1
AX-176801554	Aradu.A08	23903021	0	0	2	2	2	1	1	1	1	1	1	1	1	1	1	1	1	1	1	1	1	1	1	1	1	1	1	1	1	1	1	1	1	1	1	1	1	1	1	1	1	1
AX-176801644	scaffold_48	399170	2	2	0	0	0	1	1	1	1	1	1	1	1	1	1	1	1	1	1	1	1	1	1	1	1	1	1	1	1	1	1	1	1	1	1	1	1	1	1	1	1	1
AX-176801734	Araip.B03	47106638	0	0	2	2	2	1	1	1	1	1	1	1	1	1	1	1	1	1	1	1	1	1	1	1	1	1	1	1	1	1	1	1	1	1	1	1	1	1	1	1	1	1
AX-176801924	Araip.B05	7863719	0	0	2	2	2	1	1	1	1	1	1	1	1	1	1	1	1	1	1	1	1	1	1	1	1	1	1	1	1	1	1	1	1	1	1	1	1	1	1	1	1	1
AX-176802055	Aradu.A04	30737726	0	0	2	2	2	1	1	1	1	1	1	1	1	1	1	1	1	1	1	1	1	1	1	1	1	1	1	1	1	1	1	1	1	1	1	1	1	1	1	1	1	1
AX-176802150	Araip.B06	107603865	0	0	2	2	NoCall	1	1	1	1	1	1	1	1	1	1	1	1	1	1	1	1	1	1	1	1	1	1	1	1	1	1	1	1	1	1	1	1	1	1	1	1	1
AX-176802237	Araip.B03	54677205	0	0	2	2	2	1	1	1	1	1	1	1	1	1	1	1	1	1	1	1	1	1	1	1	1	1	1	1	1	1	1	1	1	1	1	1	1	1	1	1	1	1
AX-176802280	scaffold_720	115068	0	0	2	2	2	1	1	1	1	1	1	1	1	1	1	1	1	1	1	1	1	1	1	1	1	1	1	1	1	1	1	1	1	1	1	1	1	1	1	1	1	1
AX-176802285	scaffold_136	307173	0	0	2	2	2	1	1	1	1	1	1	1	1	1	1	1	1	1	1	1	1	1	1	1	1	1	1	1	1	1	1	1	1	1	1	1	1	1	1	1	1	1
AX-176802327	Aradu.A09	35254319	2	2	0	0	0	1	1	1	1	1	1	1	1	1	1	1	1	1	1	1	1	1	1	1	1	1	1	1	1	1	1	1	1	1	1	1	1	1	1	1	1	1
AX-176802412	Aradu.A01	99515453	0	0	2	2	2	1	1	1	1	1	1	1	1	1	1	1	1	1	1	1	1	1	1	1	1	1	1	1	1	1	1	1	1	1	1	1	1	1	1	1	1	1
AX-176802598	Aradu.A02	64742992	NoCall	0	2	2	2	1	1	1	1	1	1	1	1	1	1	1	1	1	1	1	1	1	1	1	1	1	1	1	1	1	1	1	1	1	1	1	1	1	1	1	1	1
AX-176803021	Aradu.A07	5231128	2	2	0	0	0	1	1	1	1	1	1	1	1	1	1	1	1	1	1	1	1	1	1	1	1	1	1	1	1	1	1	1	1	1	1	1	1	1	1	1	1	1
AX-176803096	scaffold_248	539344	0	0	2	2	2	1	1	1	1	1	1	1	1	1	1	1	1	1	1	1	1	1	1	1	1	1	1	1	1	1	1	1	1	1	1	1	1	1	1	1	1	1
AX-176803105	scaffold_530	340084	0	0	2	2	2	1	1	1	1	1	1	1	1	1	1	1	1	1	1	1	1	1	1	1	1	1	1	1	1	1	1	1	1	1	1	1	1	1	1	1	1	1
AX-176803156	Araip.B07	103579902	0	0	2	2	2	1	1	1	1	1	1	1	1	1	1	1	1	1	1	1	1	1	1	1	1	1	1	1	1	1	1	1	1	1	1	1	1	1	1	1	1	1
AX-176803391	Araip.B04	85318484	0	0	2	2	2	1	1	1	1	1	1	1	1	1	1	1	1	1	1	1	1	1	1	1	1	1	1	1	1	1	1	1	1	1	1	1	1	1	1	1	1	1
AX-176803415	Aradu.A09	76620882	2	2	0	0	0	1	1	1	1	1	1	1	1	1	1	1	1	1	1	1	1	1	1	1	1	1	1	1	1	1	1	1	1	1	1	1	1	1	1	1	1	1
AX-176803950	Aradu.A03	83639278	0	0	2	2	2	1	1	1	1	1	1	1	1	1	1	1	1	1	1	1	1	1	1	1	1	1	1	1	1	1	1	1	1	1	1	1	1	1	1	1	1	1
AX-176804144	Araip.B10	115730891	0	0	2	2	2	1	1	1	1	1	1	1	1	1	1	1	1	1	1	1	1	1	1	1	1	1	1	1	1	1	1	1	1	1	1	1	1	1	1	1	1	1
AX-176804162	Araip.B04	78852752	0	0	2	2	2	1	1	1	1	1	1	1	1	1	1	1	1	1	1	1	1	1	1	1	1	1	1	1	1	1	1	1	1	1	1	1	1	1	1	1	1	1
AX-176804208	Aradu.A08	22753763	0	0	2	2	2	1	1	1	1	1	1	1	1	1	1	1	1	1	1	1	1	1	1	1	1	1	1	1	1	1	1	1	1	1	1	1	1	1	1	1	1	1
AX-176804323	Araip.B04	65296784	0	0	2	2	2	1	1	1	1	1	1	1	1	1	1	1	1	1	1	1	1	1	1	1	1	1	1	1	1	1	1	1	1	1	1	1	1	1	1	1	1	1
AX-176804481	Araip.B03	105888137	0	0	2	2	2	1	1	1	1	1	1	1	1	1	1	1	1	1	1	1	1	1	1	1	1	1	1	1	1	1	1	1	1	1	1	1	1	1	1	1	1	1
AX-176804541	Aradu.A01	18236281	0	0	2	2	2	1	1	1	1	1	1	1	1	1	1	1	1	1	1	1	1	1	1	1	1	1	1	1	1	1	1	1	1	1	1	1	1	1	1	1	1	1
AX-176804551	Aradu.A06	86401836	0	0	2	2	2	1	1	1	1	1	1	1	1	1	1	1	1	1	1	1	1	1	1	1	1	1	1	1	1	1	1	1	1	1	1	1	1	1	1	1	1	1
AX-176804898	Aradu.A05	39613442	2	2	0	0	0	1	1	1	1	1	1	1	1	1	1	1	1	1	1	1	1	1	1	1	1	1	1	1	1	1	1	1	1	1	1	1	1	1	1	1	1	1
AX-176804993	Araip.B01	127066713	2	2	0	0	0	1	1	1	1	1	1	1	1	1	1	1	1	1	1	1	1	1	1	1	1	1	1	1	1	1	1	1	1	1	1	1	1	1	1	1	1	1
AX-176805204	Araip.B04	41860484	0	0	2	2	2	1	1	1	1	1	1	1	1	1	1	1	1	1	1	1	1	1	1	1	1	1	1	1	1	1	1	1	1	1	1	1	1	1	1	1	1	1
AX-176805341	Aradu.A01	30341284	0	0	2	2	2	1	1	1	1	1	1	1	1	1	1	1	1	1	1	1	1	1	1	1	1	1	1	1	1	1	1	1	1	1	1	1	1	1	1	1	1	1
AX-176805416	Araip.B03	75144332	0	0	2	2	2	1	1	1	1	1	1	1	1	1	1	1	1	1	1	1	1	1	1	1	1	1	1	1	1	1	1	1	1	1	1	1	1	1	1	1	1	1
AX-176805505	Araip.B03	108820416	0	0	2	2	2	1	1	1	1	1	1	1	1	1	1	1	1	1	1	1	1	1	1	1	1	1	1	1	1	1	1	1	1	1	1	1	1	1	1	1	1	1
AX-176805605	Aradu.A03	126506544	0	0	2	2	2	1	1	1	1	1	1	1	1	1	1	1	1	1	1	1	1	1	1	1	1	1	1	1	1	1	1	1	1	1	1	1	1	1	1	1	1	1
AX-176805646	Aradu.A02	80149907	2	2	0	0	0	1	1	1	1	1	1	1	1	1	1	1	1	1	1	1	1	1	1	1	1	1	1	1	1	1	1	1	1	1	1	1	1	1	1	1	1	1
AX-176805751	Araip.B06	114440341	0	0	2	2	2	1	1	1	1	1	1	1	1	1	1	1	1	1	1	1	1	1	1	1	1	1	1	1	1	1	1	1	1	1	1	1	1	1	1	1	1	1
AX-176805789	Aradu.A01	39374716	0	0	2	2	2	1	1	1	1	1	1	1	1	1	1	1	1	1	1	1	1	1	1	1	1	1	1	1	1	1	1	1	1	1	1	1	1	1	1	1	1	1
AX-176805976	Aradu.A01	93101047	2	2	0	0	0	1	1	1	1	1	1	1	1	1	1	1	1	1	1	1	1	1	1	1	1	1	1	1	1	1	1	1	1	1	1	1	1	1	1	1	1	1
AX-176806011	scaffold_38	1072361	0	0	2	2	2	1	1	1	1	1	1	1	1	1	1	1	1	1	1	1	1	1	1	1	1	1	1	1	1	1	1	1	1	1	1	1	1	1	1	1	1	1
AX-176806100	Aradu.A07	55457156	0	0	2	2	2	1	1	1	1	1	1	1	1	1	1	1	1	1	1	1	1	1	1	1	1	1	1	1	1	1	1	1	1	1	1	1	1	1	1	1	1	1
AX-176806232	Araip.B01	9418117	0	0	2	2	2	1	1	1	1	1	1	1	1	1	1	1	1	1	1	1	1	1	1	1	1	1	1	1	1	1	1	1	1	1	1	1	1	1	1	1	1	1
AX-176806248	scaffold_4041	21971	2	2	0	0	0	1	1	1	1	1	1	1	1	1	1	1	1	1	1	1	1	1	1	1	1	1	1	1	1	1	1	1	1	1	1	1	1	1	1	1	1	1
AX-176806255	scaffold_515	69366	0	0	2	2	2	1	1	1	1	1	1	1	1	1	1	1	1	1	1	1	1	1	1	1	1	1	1	1	1	1	1	1	1	1	1	1	1	1	1	1	1	1
AX-176806370	Aradu.A03	94647060	2	2	0	0	0	1	1	1	1	1	1	1	1	1	1	1	1	1	1	1	1	1	1	1	1	1	1	1	1	1	1	1	1	1	1	1	1	1	1	1	1	1
AX-176806486	scaffold_1465	207844	0	0	2	2	2	1	1	1	1	1	1	1	1	1	1	1	1	1	1	1	1	1	1	1	1	1	1	1	1	1	1	1	1	1	1	1	1	1	1	1	1	1
AX-176806559	Aradu.A01	106001415	0	0	2	2	2	1	1	1	1	1	1	1	1	1	1	1	1	1	1	1	1	1	1	1	1	1	1	1	1	1	1	1	1	1	1	1	1	1	1	1	1	1
AX-176806875	Aradu.A03	90874307	0	0	2	2	2	1	1	1	1	1	1	1	1	1	1	1	1	1	1	1	1	1	1	1	1	1	1	1	1	1	1	1	1	1	1	1	1	1	1	1	1	1
AX-176806964	Aradu.A01	100421849	0	0	2	2	2	1	1	1	1	1	1	1	1	1	1	1	1	1	1	1	1	1	1	1	1	1	1	1	1	1	1	1	1	1	1	1	1	1	1	1	1	1
AX-176806993	Aradu.A03	8251331	2	2	0	0	0	1	1	1	1	1	1	1	1	1	1	1	1	1	1	1	1	1	1	1	1	1	1	1	1	1	1	1	1	1	1	1	1	1	1	1	1	1
AX-176807020	Araip.B03	73579709	0	0	2	2	2	1	1	1	1	1	1	1	1	1	1	1	1	1	1	1	1	1	1	1	1	1	1	1	1	1	1	1	1	1	1	1	1	1	1	1	1	1
AX-176807250	Aradu.A01	12817435	0	0	2	2	2	1	1	1	1	1	1	1	1	1	1	1	1	1	1	1	1	1	1	1	1	1	1	1	1	1	1	1	1	1	1	1	1	1	1	1	1	1
AX-176807407	Araip.B06	70287918	0	0	2	2	2	1	1	1	1	1	1	1	1	1	1	1	1	1	1	1	1	1	1	1	1	1	1	1	1	1	1	1	1	1	1	1	1	1	1	1	1	1
AX-176807487	scaffold_3530	181876	2	2	0	0	0	1	1	1	1	1	1	1	1	1	1	1	1	1	1	1	1	1	1	1	1	1	1	1	1	1	1	1	1	1	1	1	1	1	1	1	1	1
AX-176807578	Aradu.A01	104509769	0	0	2	2	2	1	1	1	1	1	1	1	1	1	1	1	1	1	1	1	1	1	1	1	1	1	1	1	1	1	1	1	1	1	1	1	1	1	1	1	1	1
AX-176807602	Aradu.A01	27791891	2	2	0	0	0	1	1	1	1	1	1	1	1	1	1	1	1	1	1	1	1	1	1	1	1	1	1	1	1	1	1	1	1	1	1	1	1	1	1	1	1	1
AX-176807622	Araip.B01	101512986	0	0	2	2	2	1	1	1	1	1	1	1	1	1	1	1	1	1	1	1	1	1	1	1	1	1	1	1	1	1	1	1	1	1	1	1	1	1	1	1	1	1
AX-176807718	Araip.B06	106606952	0	0	2	2	2	1	1	1	1	1	1	1	1	1	1	1	1	1	1	1	1	1	1	1	1	1	1	1	1	1	1	1	1	1	1	1	1	1	1	1	1	1
AX-176807794	scaffold_967	218915	0	0	2	2	2	1	1	1	1	1	1	1	1	1	1	1	1	1	1	1	1	1	1	1	1	1	1	1	1	1	1	1	1	1	1	1	1	1	1	1	1	1
AX-176807996	Aradu.A04	15533403	0	0	2	2	2	1	1	1	1	1	1	1	1	1	1	1	1	1	1	1	1	1	1	1	1	1	1	1	1	1	1	1	1	1	1	1	1	1	1	1	1	1
AX-176808214	Aradu.A02	9338022	2	2	0	0	0	1	1	1	1	1	1	1	1	1	1	1	1	1	1	1	1	1	1	1	1	1	1	1	1	1	1	1	1	1	1	1	1	1	1	1	1	1
AX-176808273	Aradu.A04	120981213	2	2	0	0	0	1	1	1	1	1	1	1	1	1	1	1	1	1	1	1	1	1	1	1	1	1	1	1	1	1	1	1	1	1	1	1	1	1	1	1	1	1
AX-176808326	Aradu.A01	77471160	0	0	2	2	2	1	1	1	1	1	1	1	1	1	1	1	1	1	1	1	1	1	1	1	1	1	1	1	1	1	1	1	1	1	1	1	1	1	1	1	1	1
AX-176808388	Aradu.A01	61350768	0	0	2	2	2	1	1	1	1	1	1	1	1	1	1	1	1	1	1	1	1	1	1	1	1	1	1	1	1	1	1	1	1	1	1	1	1	1	1	1	1	1
AX-176808516	Aradu.A06	10001136	0	0	2	2	2	1	1	1	1	1	1	1	1	1	1	1	1	1	1	1	1	1	1	1	1	1	1	1	1	1	1	1	1	1	1	1	1	1	1	1	1	1
AX-176808536	Aradu.A08	30527683	2	2	0	0	0	1	1	1	1	1	1	1	1	1	1	1	1	1	1	1	1	1	1	1	1	1	1	1	1	1	1	1	1	1	1	1	1	1	1	1	1	1
AX-176808538	Aradu.A03	86272960	2	2	0	0	0	1	1	1	1	1	1	1	1	1	1	1	1	1	1	1	1	1	1	1	1	1	1	1	1	1	1	1	1	1	1	1	1	1	1	1	1	1
AX-176808585	Aradu.A05	44633884	0	0	2	2	2	1	1	1	1	1	1	1	1	1	1	1	1	1	1	1	1	1	1	1	1	1	1	1	1	1	1	1	1	1	1	1	1	1	1	1	1	1
AX-176808646	scaffold_192	483265	2	2	0	0	0	1	1	1	1	1	1	1	1	1	1	1	1	1	1	1	1	1	1	1	1	1	1	1	1	1	1	1	1	1	1	1	1	1	1	1	1	1
AX-176809085	Araip.B07	100297890	0	0	2	2	2	1	1	1	1	1	1	1	1	1	1	1	1	1	1	1	1	1	1	1	1	1	1	1	1	1	1	1	1	1	1	1	1	1	1	1	1	1
AX-176809141	Araip.B07	9720749	0	0	2	2	2	1	1	1	1	1	1	1	1	1	1	1	1	1	1	1	1	1	1	1	1	1	1	1	1	1	1	1	1	1	1	1	1	1	1	1	1	1
AX-176809214	scaffold_800	36041	0	0	2	2	2	1	1	1	1	1	1	1	1	1	1	1	1	1	1	1	1	1	1	1	1	1	1	1	1	1	1	1	1	1	1	1	1	1	1	1	1	1
AX-176809498	Aradu.A08	47378713	0	0	2	2	2	1	1	1	1	1	1	1	1	1	1	1	1	1	1	1	1	1	1	1	1	1	1	1	1	1	1	1	1	1	1	1	1	1	1	1	1	1
AX-176809519	Araip.B01	64037906	0	0	2	2	2	1	1	1	1	1	1	1	1	1	1	1	1	1	1	1	1	1	1	1	1	1	1	1	1	1	1	1	1	1	1	1	1	1	1	1	1	1
AX-176809747	Araip.B04	20208850	0	0	2	2	2	1	1	1	1	1	1	1	1	1	1	1	1	1	1	1	1	1	1	1	1	1	1	1	1	1	1	1	1	1	1	1	1	1	1	1	1	1
AX-176809776	scaffold_3382	168057	2	2	0	0	0	1	1	1	1	1	1	1	1	1	1	1	1	1	1	1	1	1	1	1	1	1	1	1	1	1	1	1	1	1	1	1	1	1	1	1	1	1
AX-176809839	scaffold_4992	20832	0	0	2	2	2	1	1	1	1	1	1	1	1	1	1	1	1	1	1	1	1	1	1	1	1	1	1	1	1	1	1	1	1	1	1	1	1	1	1	1	1	1
AX-176809947	Araip.B06	111963817	0	0	2	2	2	1	1	1	1	1	1	1	1	1	1	1	1	1	1	1	1	1	1	1	1	1	1	1	1	1	1	1	1	1	1	1	1	1	1	1	1	1
AX-176809952	Aradu.A02	52028088	2	2	0	0	0	1	1	1	1	1	1	1	1	1	1	1	1	1	1	1	1	1	1	1	1	1	1	1	1	1	1	1	1	1	1	1	1	1	1	1	1	1
AX-176810325	scaffold_1538	220178	0	0	2	2	2	1	1	1	1	1	1	1	1	1	1	1	1	1	1	1	1	1	1	1	1	1	1	1	1	1	1	1	1	1	1	1	1	1	1	1	1	1
AX-176810578	Aradu.A04	120936776	0	0	2	2	2	1	1	1	1	1	1	1	1	1	1	1	1	1	1	1	1	1	1	1	1	1	1	1	1	1	1	1	1	1	1	1	1	1	1	1	1	1
AX-176810867	Araip.B01	49716591	0	0	2	2	2	1	1	1	1	1	1	1	1	1	1	1	1	1	1	1	1	1	1	1	1	1	1	1	1	1	1	1	1	1	1	1	1	1	1	1	1	1
AX-176810960	scaffold_1706	253528	0	0	2	2	2	1	1	1	1	1	1	1	1	1	1	1	1	1	1	1	1	1	1	1	1	1	1	1	1	1	1	1	1	1	1	1	1	1	1	1	1	1
AX-176811212	Aradu.A01	982636	2	2	0	0	0	1	1	1	1	1	1	1	1	1	1	1	1	1	1	1	1	1	1	1	1	1	1	1	1	1	1	1	1	1	1	1	1	1	1	1	1	1
AX-176811220	scaffold_2833	161143	0	0	2	2	2	1	1	1	1	1	1	1	1	1	1	1	1	1	1	1	1	1	1	1	1	1	1	1	1	1	1	1	1	1	1	1	1	1	1	1	1	1
AX-176811408	Araip.B05	7189797	0	0	2	2	2	1	1	1	1	1	1	1	1	1	1	1	1	1	1	1	1	1	1	1	1	1	1	1	1	1	1	1	1	1	1	1	1	1	1	1	1	1
AX-176811546	Araip.B04	106211054	0	0	2	2	2	1	1	1	1	1	1	1	1	1	1	1	1	1	1	1	1	1	1	1	1	1	1	1	1	1	1	1	1	1	1	1	1	1	1	1	1	1
AX-176811656	Aradu.A04	23893872	0	0	2	2	2	1	1	1	1	1	1	1	1	1	1	1	1	1	1	1	1	1	1	1	1	1	1	1	1	1	1	1	1	1	1	1	1	1	1	1	1	1
AX-176811706	Aradu.A03	32290418	0	0	2	2	2	1	1	1	1	1	1	1	1	1	1	1	1	1	1	1	1	1	1	1	1	1	1	1	1	1	1	1	1	1	1	1	1	1	1	1	1	1
AX-176811749	Araip.B08	122555740	0	0	2	2	2	1	1	1	1	1	1	1	1	1	1	1	1	1	1	1	1	1	1	1	1	1	1	1	1	1	1	1	1	1	1	1	1	1	1	1	1	1
AX-176811781	Aradu.A03	133288454	2	2	0	0	0	1	1	1	1	1	1	1	1	1	1	1	1	1	1	1	1	1	1	1	1	1	1	1	1	1	1	1	1	1	1	1	1	1	1	1	1	1
AX-176811796	Aradu.A03	38259800	0	0	2	2	2	1	1	1	1	1	1	1	1	1	1	1	1	1	1	1	1	1	1	1	1	1	1	1	1	1	1	1	1	1	1	1	1	1	1	1	1	1
AX-176811880	Araip.B04	24488728	0	0	2	2	2	1	1	1	1	1	1	1	1	1	1	1	1	1	1	1	1	1	1	1	1	1	1	1	1	1	1	1	1	1	1	1	1	1	1	1	1	1
AX-176811897	Araip.B09	108665150	0	0	2	2	2	1	1	1	1	1	1	1	1	1	1	1	1	1	1	1	1	1	1	1	1	1	1	1	1	1	1	1	1	1	1	1	1	1	1	1	1	1
AX-176811922	Araip.B04	131012486	0	0	2	2	2	1	1	1	1	1	1	1	1	1	1	1	1	1	1	1	1	1	1	1	1	1	1	1	1	1	1	1	1	1	1	1	1	1	1	1	1	1
AX-176811937	Araip.B07	110867577	0	0	2	2	2	1	1	1	1	1	1	1	1	1	1	1	1	1	1	1	1	1	1	1	1	1	1	1	1	1	1	1	1	1	1	1	1	1	1	1	1	1
AX-176811942	scaffold_3863	158716	0	0	2	2	2	1	1	1	1	1	1	1	1	1	1	1	1	1	1	1	1	1	1	1	1	1	1	1	1	1	1	1	1	1	1	1	1	1	1	1	1	1
AX-176811947	Araip.B01	126262699	0	0	2	2	2	1	1	1	1	1	1	1	1	1	1	1	1	1	1	1	1	1	1	1	1	1	1	1	1	1	1	1	1	1	1	1	1	1	1	1	1	1
AX-176812052	Araip.B01	80807589	0	0	2	2	2	1	1	1	1	1	1	1	1	1	1	1	1	1	1	1	1	1	1	1	1	1	1	1	1	1	1	1	1	1	1	1	1	1	1	1	1	1
AX-176812136	Araip.B02	14728513	0	0	2	2	2	1	1	1	1	1	1	1	1	1	1	1	1	1	1	1	1	1	1	1	1	1	1	1	1	1	1	1	1	1	1	1	1	1	1	1	1	1
AX-176812214	Aradu.A07	50595099	0	0	2	2	2	1	1	1	1	1	1	1	1	1	1	1	1	1	1	1	1	1	1	1	1	1	1	1	1	1	1	1	1	1	1	1	1	1	1	1	1	1
AX-176812281	Araip.B05	23669853	0	0	2	2	2	1	1	1	1	1	1	1	1	1	1	1	1	1	1	1	1	1	1	1	1	1	1	1	1	1	1	1	1	1	1	1	1	1	1	1	1	1
AX-176812416	Araip.B03	110280912	0	0	2	2	2	1	1	1	1	1	1	1	1	1	1	1	1	1	1	1	1	1	1	1	1	1	1	1	1	1	1	1	1	1	1	1	1	1	1	1	1	1
AX-176812482	Araip.B05	61900547	0	0	2	2	2	1	1	1	1	1	1	1	1	1	1	1	1	1	1	1	1	1	1	1	1	1	1	1	1	1	1	1	1	1	1	1	1	1	1	1	1	1
AX-176812547	Araip.B06	20151179	0	0	2	2	2	1	1	1	1	1	1	1	1	1	1	1	1	1	1	1	1	1	1	1	1	1	1	1	1	1	1	1	1	1	1	1	1	1	1	1	1	1
AX-176812836	Aradu.A03	110850153	0	0	2	2	2	1	1	1	1	1	1	1	1	1	1	1	1	1	1	1	1	1	1	1	1	1	1	1	1	1	1	1	1	1	1	1	1	1	1	1	1	1
AX-176812877	Araip.B03	50828292	0	0	2	2	2	1	1	1	1	1	1	1	1	1	1	1	1	1	1	1	1	1	1	1	1	1	1	1	1	1	1	1	1	1	1	1	1	1	1	1	1	1
AX-176813166	Araip.B05	119858337	0	0	2	2	2	1	1	1	1	1	1	1	1	1	1	1	1	1	1	1	1	1	1	1	1	1	1	1	1	1	1	1	1	1	1	1	1	1	1	1	1	1
AX-176813193	Aradu.A01	69856669	2	2	0	0	0	1	1	1	1	1	1	1	1	1	1	1	1	1	1	1	1	1	1	1	1	1	1	1	1	1	1	1	1	1	1	1	1	1	1	1	1	1
AX-176813304	Aradu.A03	67998145	0	0	2	2	2	1	1	1	1	1	1	1	1	1	1	1	1	1	1	1	1	1	1	1	1	1	1	1	1	1	1	1	1	1	1	1	1	1	1	1	1	1
AX-176813338	Aradu.A03	32458874	2	2	0	0	0	1	1	1	1	1	1	1	1	1	1	1	1	1	1	1	1	1	1	1	1	1	1	1	1	1	1	1	1	1	1	1	1	1	1	1	1	1
AX-176813547	scaffold_499	679486	0	0	2	2	2	1	1	1	1	1	1	1	1	1	1	1	1	1	1	1	1	1	1	1	1	1	1	1	1	1	1	1	1	1	1	1	1	1	1	1	1	1
AX-176813588	Araip.B03	10908642	0	0	2	2	2	1	1	1	1	1	1	1	1	1	1	1	1	1	1	1	1	1	1	1	1	1	1	1	1	1	1	1	1	1	1	1	1	1	1	1	1	1
AX-176813714	Aradu.A03	19950987	0	0	2	2	2	1	1	1	1	1	1	1	1	1	1	1	1	1	1	1	1	1	1	1	1	1	1	1	1	1	1	1	1	1	1	1	1	1	1	1	1	1
AX-176813824	Aradu.A01	25204253	0	0	2	2	2	1	1	1	1	1	1	1	1	1	1	1	1	1	1	1	1	1	1	1	1	1	1	1	1	1	1	1	1	1	1	1	1	1	1	1	1	1
AX-176813852	Aradu.A01	76713643	0	0	2	2	2	1	1	1	1	1	1	1	1	1	1	1	1	1	1	1	1	1	1	1	1	1	1	2	1	1	1	1	1	1	1	1	1	1	1	1	1	1
AX-176813854	Aradu.A01	35225647	0	0	2	2	2	1	1	1	1	1	1	1	1	1	1	1	1	1	1	1	1	1	1	1	1	1	1	1	1	1	1	1	1	1	1	1	1	1	1	1	1	1
AX-176813961	Aradu.A02	87922082	0	0	2	2	2	1	1	1	1	1	1	1	1	1	1	1	1	1	1	1	1	1	1	1	1	1	1	1	1	1	1	1	1	1	1	1	1	1	1	1	1	1
AX-176814007	Araip.B01	104424811	0	0	2	2	2	1	1	1	1	1	1	1	1	1	1	1	1	1	1	1	1	1	1	1	1	1	1	1	1	1	1	1	1	1	1	1	1	1	1	1	1	1
AX-176814022	Aradu.A02	63510660	2	2	0	0	0	1	1	1	1	1	1	1	1	1	1	1	1	1	1	1	1	1	1	1	1	1	1	1	1	1	1	1	1	1	1	1	1	1	1	1	1	1
AX-176814189	Aradu.A03	89937061	2	2	0	0	0	1	1	1	1	1	1	1	1	1	1	1	1	1	1	1	1	1	1	1	1	1	1	1	1	1	1	1	1	1	1	1	1	1	1	1	1	1
AX-176814227	Aradu.A03	1699691	0	0	2	2	2	1	1	1	1	1	1	1	1	1	1	1	1	1	1	1	1	1	1	1	1	1	1	1	1	1	1	1	1	1	1	1	1	1	1	1	1	1
AX-176814417	Aradu.A03	93614348	0	0	2	2	2	1	1	1	1	1	1	1	1	1	1	1	1	1	1	1	1	1	1	1	1	1	1	1	1	1	1	1	1	1	1	1	1	1	1	1	1	1
AX-176814441	Aradu.A03	107725365	0	0	2	2	2	1	1	1	1	1	1	1	1	1	1	1	1	1	1	1	1	1	1	1	1	1	1	1	1	1	1	1	1	1	1	1	1	1	1	1	1	1
AX-176814529	Araip.B04	65358155	0	0	2	2	2	1	1	1	1	1	1	1	1	1	1	1	1	1	1	1	1	1	1	1	1	1	1	1	1	1	1	1	1	1	1	1	1	1	1	1	1	1
AX-176814585	Aradu.A04	25121675	0	0	2	2	2	1	1	1	1	1	1	1	1	1	1	1	1	1	1	1	1	1	1	1	1	1	1	1	1	1	1	1	1	1	1	1	1	1	1	1	1	1
AX-176814924	Aradu.A05	88410529	0	0	2	2	2	1	1	1	1	1	1	1	1	1	1	1	1	1	1	1	1	1	1	1	1	1	1	1	1	1	1	1	1	1	1	1	1	1	1	1	1	1
AX-176814935	Aradu.A02	84413610	0	0	2	2	2	1	1	1	1	1	1	1	1	1	1	1	1	1	1	1	1	1	1	1	1	1	1	1	1	1	1	1	1	1	1	1	1	1	1	1	1	1
AX-176814948	Araip.B02	84540948	0	0	2	2	2	1	1	1	1	1	1	1	1	1	1	1	1	1	1	1	1	1	1	1	1	1	1	1	1	1	1	1	1	1	1	1	1	1	1	1	1	1
AX-176814952	Aradu.A01	60233509	0	0	2	2	2	1	1	1	1	1	1	1	1	1	1	1	1	1	1	1	1	1	1	1	1	1	1	1	1	1	1	1	1	1	1	1	1	1	1	1	1	1
AX-176815131	Aradu.A01	79676601	0	0	2	2	2	1	1	1	1	1	1	1	1	1	1	1	1	1	1	1	1	1	1	1	1	1	1	1	1	1	1	1	1	1	1	1	1	1	1	1	1	1
AX-176815478	Araip.B02	68434105	0	0	2	2	2	1	1	1	1	1	1	1	1	1	1	1	1	1	1	1	1	1	1	1	1	1	1	1	1	1	1	1	1	1	1	1	1	1	1	1	1	1
AX-176815533	Araip.B03	14546969	2	2	0	0	0	1	1	1	1	1	1	1	1	1	1	1	1	1	1	1	1	1	1	1	1	1	1	1	1	1	1	1	1	1	1	1	1	1	1	1	1	1
AX-176815851	scaffold_48	1031130	0	0	2	2	2	1	1	1	1	1	1	1	1	1	1	1	1	1	1	1	1	1	1	1	1	1	1	1	1	1	1	1	1	1	1	1	1	1	1	1	1	1
AX-176815870	Araip.B08	117288581	2	2	0	0	0	1	1	1	1	1	1	1	1	1	1	1	1	1	1	1	1	1	1	1	1	1	1	1	1	1	1	1	1	1	1	1	1	1	1	1	1	1
AX-176816072	Araip.B03	135317267	0	0	2	2	2	1	1	1	1	1	1	1	1	1	1	1	1	1	1	1	1	1	1	1	1	1	1	1	1	1	1	1	1	1	1	1	1	1	1	1	1	1
AX-176816288	Araip.B01	102071673	2	2	0	0	0	1	1	1	1	1	1	1	1	1	1	1	1	1	1	1	1	1	1	1	1	1	1	1	1	1	1	1	1	1	1	1	1	1	1	1	1	1
AX-176816289	Aradu.A02	91904703	2	2	0	0	0	1	1	1	1	1	1	1	1	1	1	1	1	1	1	1	1	1	1	1	1	1	1	1	1	1	1	1	1	1	1	1	1	1	1	1	1	1
AX-176816337	Araip.B01	18245953	0	0	2	2	2	1	1	1	1	1	1	1	1	1	1	1	1	1	1	1	1	1	1	1	1	1	1	1	1	1	1	1	1	1	1	1	1	1	1	1	1	1
AX-176816402	Araip.B01	42915785	0	0	2	2	2	1	1	1	1	1	1	1	1	1	1	1	1	1	1	1	1	1	1	1	1	1	1	1	1	1	1	1	1	1	1	1	1	1	1	1	1	1
AX-176816486	Araip.B06	120201963	2	2	0	0	0	1	1	1	1	1	1	1	1	1	1	1	1	1	1	1	1	1	1	1	1	1	1	1	1	1	1	1	1	1	1	1	1	1	1	1	1	1
AX-176816500	Araip.B01	107652500	0	0	2	2	2	1	1	1	1	1	1	1	1	1	1	1	1	1	1	1	1	1	1	1	1	1	1	1	1	1	1	1	1	1	1	1	1	1	1	1	1	1
AX-176816640	Aradu.A07	74701046	0	0	2	2	2	1	1	1	1	1	1	1	1	1	1	1	1	1	1	1	1	1	1	1	1	1	1	1	1	1	1	1	1	1	1	1	1	1	1	1	1	1
AX-176816662	Araip.B02	75295388	0	0	2	2	2	1	1	1	1	1	1	1	1	1	1	1	1	1	1	1	1	1	1	1	1	1	1	1	1	1	1	1	1	1	1	1	1	1	1	1	1	1
AX-176816785	Araip.B03	111867944	NoCall	2	0	0	0	1	1	1	1	1	1	1	1	1	1	1	1	1	1	1	1	1	1	1	1	1	1	1	1	1	1	1	1	1	1	1	1	1	1	1	1	1
AX-176816920	Araip.B03	71083056	0	0	2	2	2	1	1	1	1	1	1	1	1	1	1	1	1	1	1	1	1	1	1	1	1	1	1	1	1	1	1	1	1	1	1	1	1	1	1	1	1	1
AX-176816941	Araip.B01	134242596	2	2	0	0	0	1	1	1	1	1	1	1	1	1	1	1	1	1	1	1	1	1	1	1	1	1	1	1	1	1	1	1	1	1	1	1	1	1	1	1	1	1
AX-176816976	Araip.B03	111152299	0	0	2	2	2	1	1	1	1	1	1	1	1	1	1	1	1	1	1	1	1	1	1	1	1	1	1	1	1	1	1	1	1	1	1	1	1	1	1	1	1	1
AX-176817092	Araip.B04	17480116	0	0	2	2	2	1	1	1	1	1	1	1	1	1	1	1	1	1	1	1	1	1	1	1	1	1	1	1	1	1	1	1	1	1	1	1	1	1	1	1	1	1
AX-176817245	Araip.B04	108447874	0	0	2	2	2	1	1	1	1	1	1	1	1	1	1	1	1	1	1	1	1	1	1	1	1	1	1	1	1	1	1	1	1	1	1	1	1	1	1	1	1	1
AX-176817412	Araip.B01	100318807	0	0	2	2	2	1	1	1	1	1	1	1	1	1	1	1	1	1	1	1	1	1	1	1	1	1	1	1	1	1	1	1	1	1	1	1	1	1	1	1	1	1
AX-176817546	Araip.B06	29938305	0	0	2	2	2	1	1	1	1	1	1	1	1	1	1	1	1	1	1	1	1	1	1	1	1	1	1	1	1	1	1	1	1	1	1	1	1	1	1	1	1	1
AX-176817557	Araip.B06	32628545	0	0	2	2	2	1	1	1	1	1	1	1	1	1	1	1	1	1	1	1	1	1	1	1	1	1	1	1	1	1	1	1	1	1	1	1	1	1	1	1	1	1
AX-176817595	Araip.B03	81114683	0	0	2	2	2	1	1	1	1	1	1	1	1	1	1	1	1	1	1	1	1	1	1	1	1	1	1	1	1	1	1	1	1	1	1	1	1	1	1	1	1	1
AX-176817747	Araip.B07	17400993	2	2	0	0	0	1	1	1	1	1	1	1	1	1	1	1	1	1	1	1	1	1	1	1	1	1	1	1	1	1	1	1	1	1	1	1	1	1	1	1	1	1
AX-176817755	Araip.B06	122600756	0	0	2	2	2	1	1	1	1	1	1	1	1	1	1	1	1	1	1	1	1	1	1	1	1	1	1	1	1	1	1	1	1	1	1	1	1	1	1	1	1	1
AX-176817808	Araip.B07	11291810	0	0	2	2	2	1	1	1	1	1	1	1	1	1	1	1	1	1	1	1	1	1	1	1	1	1	1	1	1	1	1	1	1	1	1	1	1	1	1	1	1	1
AX-176817885	Araip.B07	122260525	0	0	2	2	2	1	1	1	1	1	1	1	1	1	1	1	1	1	1	1	1	1	1	1	1	1	1	1	1	1	1	1	1	1	1	1	1	1	1	1	1	1
AX-176817923	Araip.B08	45457297	0	0	2	2	2	1	1	1	1	1	1	1	1	1	1	1	1	1	1	1	1	1	1	1	1	1	1	1	1	1	1	1	1	1	1	1	1	1	1	1	1	1
AX-176817953	Araip.B08	110509792	0	0	2	2	2	1	1	1	1	1	1	1	1	1	1	1	1	1	1	1	1	1	1	1	1	1	1	1	1	1	1	1	1	1	1	1	1	1	1	1	1	1
AX-176818024	Aradu.A01	51499774	0	0	2	2	2	1	1	1	1	1	1	1	1	1	1	1	1	1	1	1	1	1	1	1	1	1	1	1	1	1	1	1	1	1	1	1	1	1	1	1	1	1
AX-176818162	Aradu.A02	22732056	0	0	2	2	2	1	1	1	1	1	1	1	1	1	1	1	1	1	1	1	1	1	1	1	1	1	1	1	1	1	1	1	1	1	1	1	1	1	1	1	1	1
AX-176818377	Aradu.A01	91823539	0	0	2	2	2	1	1	1	1	1	1	1	1	1	1	1	1	1	1	1	1	1	1	1	1	1	1	1	1	1	1	1	1	1	1	1	1	1	1	1	1	1
AX-176818411	scaffold_111	669824	0	0	2	2	2	1	1	1	1	1	1	1	1	1	1	1	1	1	1	1	1	1	1	1	1	1	1	1	1	1	1	1	1	1	1	1	1	1	1	1	1	1
AX-176818429	Araip.B06	107603852	0	0	2	2	2	1	1	1	1	1	1	1	1	1	1	1	1	1	1	1	1	1	1	1	1	1	1	1	1	1	1	1	1	1	1	1	1	1	1	1	1	1
AX-176819245	Aradu.A02	68288594	2	2	0	0	0	1	1	1	1	1	1	1	1	1	1	1	1	1	1	1	1	1	1	1	1	1	1	1	1	1	1	1	1	1	1	1	1	1	1	1	1	1
AX-176819270	Aradu.A09	117923775	2	2	0	0	0	1	1	1	1	1	1	1	1	1	1	1	1	1	1	1	1	1	1	1	1	1	1	1	1	1	1	1	1	1	1	1	1	1	1	1	1	1
AX-176819395	Aradu.A01	14793463	0	0	2	2	2	1	1	1	1	1	1	1	1	1	1	1	1	1	1	1	1	1	1	1	1	1	1	1	1	1	1	1	1	1	1	1	1	1	1	1	1	1
AX-176819422	Aradu.A03	2745242	0	0	2	2	2	1	1	1	1	1	1	1	1	1	1	1	1	1	1	1	1	1	1	1	1	1	1	1	1	1	1	1	1	1	1	1	1	1	1	1	1	1
AX-176819440	Araip.B08	8121508	0	0	2	2	2	1	1	1	1	1	1	1	1	1	1	1	1	1	1	1	1	1	1	1	1	1	1	1	1	1	1	1	1	1	1	1	1	1	1	1	1	1
AX-176819475	Araip.B03	93886248	0	0	2	2	2	1	1	1	1	1	1	1	1	1	1	1	1	1	1	1	1	1	1	1	1	1	1	1	1	1	1	1	1	1	1	1	1	1	1	1	1	1
AX-176819478	Araip.B10	32228751	0	0	2	2	2	1	1	1	1	1	1	1	1	1	1	1	1	1	1	1	1	1	1	1	1	1	1	1	1	1	1	1	1	1	1	1	1	1	1	1	1	1
AX-176819503	Aradu.A01	96215188	2	2	0	0	0	1	1	1	1	1	1	1	1	1	1	1	1	1	1	1	1	1	1	1	1	1	1	1	1	1	1	1	1	1	1	1	1	1	1	1	1	1
AX-176819551	Aradu.A02	23576855	2	2	0	0	0	1	1	1	1	1	1	1	1	1	1	1	1	1	1	1	1	1	1	1	1	1	1	1	1	1	1	1	1	1	1	1	1	1	1	1	1	1
AX-176819554	Aradu.A01	33104840	0	0	2	2	2	1	1	1	1	1	1	1	1	1	1	1	1	1	1	1	1	1	1	1	1	1	1	1	1	1	1	1	1	1	1	1	1	1	1	1	1	1
AX-176819642	scaffold_1922	24183	0	0	2	2	2	1	1	1	1	1	1	1	1	1	1	1	1	1	1	1	1	1	1	1	1	1	1	1	1	1	1	1	1	1	1	1	1	1	1	1	1	1
AX-176819704	Araip.B05	38557735	0	0	2	2	2	1	1	1	1	1	1	1	1	1	1	1	1	1	1	1	1	1	1	1	1	1	1	1	1	1	1	1	1	1	1	1	1	1	1	1	1	1
AX-176819713	Araip.B03	113251004	0	0	2	2	2	1	1	1	1	1	1	1	1	1	1	1	1	1	1	1	1	1	1	1	1	1	1	1	1	1	1	1	1	1	1	1	1	1	1	1	1	1
AX-176819778	Aradu.A06	1651013	0	0	2	2	2	1	1	1	1	1	1	1	1	1	1	1	1	1	1	1	1	1	1	1	1	1	1	1	1	1	1	1	1	1	1	1	1	1	1	1	1	1
AX-176819821	Araip.B07	98689414	2	2	0	0	0	1	1	1	1	1	1	1	1	1	1	1	1	1	1	1	1	1	1	1	1	1	1	1	1	1	1	1	1	1	1	1	1	1	1	1	1	1
AX-176819836	Araip.B03	76827932	0	0	2	2	2	1	1	1	1	1	1	1	1	1	1	1	1	1	1	1	1	1	1	1	1	1	1	1	1	1	1	1	1	1	1	1	1	1	1	1	1	1
AX-176819887	Aradu.A01	106317826	0	0	2	2	2	1	1	1	1	1	1	1	1	1	1	1	1	1	1	1	1	1	1	1	1	1	1	1	1	1	1	1	1	1	1	1	1	1	1	1	1	1
AX-176819905	scaffold_360	778523	0	0	2	2	2	1	1	1	1	1	1	1	1	1	1	1	1	1	1	1	1	1	1	1	1	1	1	1	1	1	1	1	1	1	1	1	1	1	1	1	1	1
AX-176819910	Araip.B01	99448666	0	0	2	2	2	1	1	1	1	1	1	1	1	1	1	1	1	1	1	1	1	1	1	1	1	1	1	1	1	1	1	1	1	1	1	1	1	1	1	1	1	1
AX-176819913	Araip.B01	125668584	0	0	2	2	2	1	1	1	1	1	1	1	1	1	1	1	1	1	1	1	1	1	1	1	1	1	1	1	1	1	1	1	1	1	1	1	1	1	1	1	1	1
AX-176820019	Araip.B02	2612599	0	0	2	2	2	1	1	1	1	1	1	1	1	1	1	1	1	1	1	1	1	1	1	1	1	1	1	1	1	1	1	1	1	1	1	1	1	1	1	1	1	1
AX-176820144	Araip.B09	1990092	0	0	2	2	2	1	1	1	1	1	1	1	1	1	1	1	1	1	1	1	1	1	1	1	1	1	1	1	1	1	1	1	1	1	1	1	1	1	1	1	1	1
AX-176820179	Araip.B05	8164211	0	0	2	2	2	1	1	1	1	1	1	1	1	1	1	1	1	1	1	1	1	1	1	1	1	1	1	1	1	1	1	1	1	1	1	1	1	1	1	1	1	1
AX-176820262	Araip.B07	10347054	0	0	2	2	2	1	1	1	1	1	1	1	1	1	1	1	1	1	1	1	1	1	1	1	1	1	1	1	1	1	1	1	1	1	1	1	1	1	1	1	1	1
AX-176820322	Araip.B10	8150784	2	2	0	0	0	1	1	1	1	1	1	1	1	1	1	1	1	1	1	1	1	1	1	1	1	1	1	1	1	1	1	1	1	1	1	1	1	1	1	1	1	1
AX-176820347	Araip.B03	112802783	2	2	0	0	0	1	1	1	1	1	1	1	1	1	1	1	1	1	1	1	1	1	1	1	1	1	1	1	1	1	1	1	1	1	1	1	1	1	1	1	1	1
AX-176820469	Araip.B10	115959957	0	0	2	2	2	1	1	1	1	1	1	1	1	1	1	1	1	1	1	1	1	1	1	1	1	1	1	1	1	1	1	1	1	1	1	1	1	1	1	1	1	1
AX-176820656	Araip.B04	101771739	0	0	2	2	2	1	1	1	1	1	1	1	1	1	1	1	1	1	1	1	1	1	1	1	1	1	1	1	1	1	1	1	1	1	1	1	1	1	1	1	1	1
AX-176820729	Aradu.A02	35976979	2	2	0	0	0	1	1	1	1	1	1	1	1	1	1	1	1	1	1	1	1	1	1	1	1	1	1	1	1	1	1	1	1	1	1	1	1	1	1	1	1	1
AX-176820748	Araip.B08	1522718	0	0	2	2	2	1	1	1	1	1	1	1	1	1	1	1	1	1	1	1	1	1	1	1	1	1	1	1	1	1	1	1	1	1	1	1	1	1	1	1	1	1
AX-176820804	Araip.B02	5066400	0	0	2	2	2	1	1	1	1	1	1	1	1	1	1	1	1	1	1	1	1	1	1	1	1	1	1	1	1	1	1	1	1	1	1	1	1	1	1	1	1	1
AX-176820806	Araip.B10	104642381	0	0	2	2	2	1	1	1	1	1	1	1	1	1	1	1	1	1	1	1	1	1	1	1	1	1	1	1	1	1	1	1	1	1	1	1	1	1	1	1	1	1
AX-176820814	Araip.B09	146767562	0	0	2	2	2	1	1	1	1	1	1	1	1	1	1	1	1	1	1	1	1	1	1	1	1	1	1	1	1	1	1	1	1	1	1	1	1	1	1	1	1	1
AX-176820819	Araip.B08	18223520	0	0	2	2	2	1	1	1	1	1	1	1	1	1	1	1	1	1	1	1	1	1	1	1	1	1	1	1	1	1	1	1	1	1	1	1	1	1	1	1	1	1
AX-176820829	Araip.B01	134060134	2	2	0	0	0	1	1	1	1	1	1	1	1	1	1	1	1	1	1	1	1	1	1	1	1	1	1	1	1	1	1	1	1	1	1	1	1	1	1	1	1	1
AX-176820839	Aradu.A01	29501404	0	0	2	2	2	1	1	1	1	1	1	1	1	1	1	1	1	1	1	1	1	1	1	1	1	1	1	1	1	1	1	1	1	1	1	1	1	1	1	1	1	1
AX-176820891	Aradu.A01	30620197	0	0	2	2	2	1	1	1	1	1	1	1	1	1	1	1	1	1	1	1	1	1	1	1	1	1	1	1	1	1	1	1	1	1	1	1	1	1	1	1	1	1
AX-176820943	Aradu.A02	80501047	2	2	0	0	0	1	1	1	1	1	1	1	1	1	1	1	1	1	1	1	1	1	1	1	1	1	1	1	1	1	1	1	1	1	1	1	1	1	1	1	1	1
AX-176820971	Aradu.A01	43349403	0	0	2	2	2	1	1	1	1	1	1	1	1	1	1	1	1	1	1	1	1	1	1	1	1	1	1	1	1	1	1	1	1	1	1	1	1	1	1	1	1	1
AX-176820972	Araip.B07	7450307	0	0	2	2	2	1	1	1	1	1	1	1	1	1	1	1	1	1	1	1	1	1	1	1	1	1	1	1	1	1	1	1	1	1	1	1	1	1	1	1	1	1
AX-176820987	Araip.B09	117678630	0	0	2	2	2	1	1	1	1	1	1	1	1	1	1	1	1	1	1	1	1	1	1	1	1	1	1	1	1	1	1	1	1	1	1	1	1	1	1	1	1	1
AX-176821104	Araip.B08	19510429	0	0	2	2	2	1	1	1	1	1	1	1	1	1	1	1	1	1	1	1	1	1	1	1	1	1	1	1	1	1	1	1	1	1	1	1	1	1	1	1	1	1
AX-176821217	Araip.B02	97483228	0	0	2	2	2	1	1	1	1	1	1	1	1	1	1	1	1	1	1	1	1	1	1	1	1	1	1	1	1	1	1	1	1	1	1	1	1	1	1	1	1	1
AX-176821242	Araip.B09	11363604	0	0	2	2	2	1	1	1	1	1	1	1	1	1	1	1	1	1	1	1	1	1	1	1	1	1	1	1	1	1	1	1	1	1	1	1	1	1	1	1	1	1
AX-176821586	Araip.B07	26049692	0	0	2	2	2	1	1	1	1	1	1	1	1	1	1	1	1	1	1	1	1	1	1	1	1	1	1	1	1	1	1	1	1	1	1	1	1	1	1	1	1	1
AX-176821616	Araip.B08	114839532	0	0	2	2	2	1	1	1	1	1	1	1	1	1	1	1	1	1	1	1	1	1	1	1	1	1	1	1	1	1	1	1	1	1	1	1	1	1	1	1	1	1
AX-176821658	Aradu.A04	122393628	0	0	2	2	2	1	1	1	1	1	1	1	1	1	1	1	1	1	1	1	1	1	1	1	1	1	1	1	1	1	1	1	1	1	1	1	1	1	1	1	1	1
AX-176821681	Araip.B06	122581860	2	2	0	0	0	1	1	1	1	1	1	1	1	1	1	1	1	1	1	1	1	1	1	1	1	1	1	1	1	1	1	1	1	1	1	1	1	1	1	1	1	1
AX-176821964	Araip.B02	5400020	2	2	0	0	0	1	1	1	1	1	1	1	1	1	1	1	1	1	1	1	1	1	1	1	1	1	1	1	1	1	1	1	1	1	1	1	1	1	1	1	1	1
AX-176822005	Araip.B05	139673283	0	0	2	2	2	1	1	1	1	1	1	1	1	1	1	1	1	1	1	1	1	1	1	1	1	1	1	1	1	1	1	1	1	1	1	1	1	1	1	1	1	1
AX-176822059	Araip.B07	108449700	0	0	2	2	2	1	1	1	1	1	1	1	1	1	1	1	1	1	1	1	1	1	1	1	1	1	1	1	1	1	1	1	1	1	1	1	1	1	1	1	1	1
AX-176822144	Araip.B08	78307183	0	0	2	2	2	1	1	1	1	1	1	1	1	1	1	1	1	1	1	1	1	1	1	1	1	1	1	1	1	1	1	1	1	1	1	1	1	1	1	1	1	1
AX-176822175	Araip.B07	78266338	2	2	0	0	0	1	1	1	1	1	1	1	1	1	1	1	1	1	1	1	1	1	1	1	1	1	1	1	1	1	1	1	1	1	1	1	1	1	1	1	1	1
AX-176822235	Araip.B08	57786743	0	0	2	2	2	1	1	1	1	1	1	1	1	1	1	1	1	1	1	1	1	1	1	1	1	1	1	1	1	1	1	1	1	1	1	1	1	1	1	1	1	1
AX-176822336	Araip.B07	43475001	0	0	2	2	2	1	1	1	1	1	1	1	1	1	1	1	1	1	1	1	1	1	1	1	1	1	1	1	1	1	1	1	1	1	1	1	1	1	1	1	1	1
AX-176822351	Araip.B02	1294852	2	2	0	0	0	1	1	1	1	1	1	1	1	1	1	1	1	1	1	1	1	1	1	1	1	1	1	1	1	1	1	1	1	1	1	1	1	1	1	1	1	1
AX-176822392	Araip.B08	121783058	0	0	2	2	2	1	1	1	1	1	1	1	1	1	1	1	1	1	1	1	1	1	1	1	1	1	1	1	1	1	1	1	1	1	1	1	1	1	1	1	1	1
AX-176822416	Araip.B10	129776714	0	0	2	2	2	1	1	1	1	1	1	1	1	1	1	1	1	1	1	1	1	1	1	1	1	1	1	1	1	1	1	1	1	1	1	1	1	1	1	1	1	1
AX-176822455	Araip.B08	34284907	0	0	2	2	2	1	1	1	1	1	1	1	1	1	1	1	1	1	1	1	1	1	1	1	1	1	1	1	1	1	1	1	1	1	1	1	1	1	1	1	1	1
AX-176822534	Araip.B09	12385474	0	0	2	2	2	1	1	1	1	1	1	1	1	1	1	1	1	1	1	1	1	1	1	1	1	1	1	1	1	1	1	1	1	1	1	1	1	1	1	1	1	1
AX-176822630	Araip.B09	31360046	0	0	2	2	2	1	1	1	1	1	1	1	1	1	1	1	1	1	1	1	1	1	1	1	1	1	1	1	1	1	1	1	1	1	1	1	1	1	1	1	1	1
AX-176822759	Araip.B10	20739599	0	0	2	2	2	1	1	1	1	1	1	1	1	1	1	1	1	1	1	1	1	1	1	1	1	1	1	1	1	1	1	1	1	1	1	1	1	1	1	1	1	1
AX-176822806	Araip.B10	120142372	2	2	0	0	0	1	1	1	1	1	1	1	1	1	1	1	1	1	1	1	1	1	1	1	1	1	1	1	1	1	1	1	1	1	1	1	1	1	1	1	1	1
AX-176822854	Araip.B04	29721900	0	0	2	2	2	1	1	1	1	1	1	1	1	1	1	1	1	1	1	1	1	1	1	1	1	1	1	1	1	1	1	1	1	1	1	1	1	1	1	1	1	1
AX-176822903	Aradu.A01	55170173	0	0	2	2	2	1	1	1	1	1	1	1	1	1	1	1	1	1	1	1	1	1	1	1	1	1	1	1	1	1	1	1	1	1	1	1	1	1	1	1	1	1
AX-176823133	Araip.B09	33726757	0	0	2	2	2	1	1	1	1	1	1	1	1	1	1	1	1	1	1	1	1	1	1	1	1	1	1	1	1	1	1	1	1	1	1	1	1	1	1	1	1	1
AX-176823144	Araip.B09	129269017	0	0	2	2	2	1	1	1	1	1	1	1	1	1	1	1	1	1	1	1	1	1	1	1	1	1	1	1	1	1	1	1	1	1	1	1	1	1	1	1	1	1
AX-176823397	Araip.B09	12156086	0	0	2	2	2	1	1	1	1	1	1	1	1	1	1	1	1	1	1	1	1	1	1	1	1	1	1	1	1	1	1	1	1	1	1	1	1	1	1	1	1	1
AX-176823411	Araip.B08	126684394	0	0	2	2	2	1	1	1	1	1	1	1	1	1	1	1	1	1	1	1	1	1	1	1	1	1	1	1	1	1	1	1	1	1	1	1	1	1	1	1	1	1
AX-176823431	Araip.B06	65384689	0	0	2	2	2	1	1	1	1	1	1	1	1	1	1	1	1	1	1	1	1	1	1	1	1	1	1	1	1	1	1	1	1	1	1	1	1	1	1	1	1	1
AX-176823753	Araip.B07	95813584	0	0	2	2	2	1	1	1	1	1	1	1	1	1	1	1	1	1	1	1	1	1	1	1	1	1	1	1	1	1	1	1	1	1	1	1	1	1	1	1	1	1
AX-176823783	Araip.B03	40559862	0	0	2	2	2	1	1	1	1	1	1	1	1	1	1	1	1	1	1	1	1	1	1	1	1	1	1	1	1	1	1	1	1	1	1	1	1	1	1	1	1	1
AX-176823810	Araip.B09	138126687	2	2	0	0	0	1	1	1	1	1	1	1	1	1	1	1	1	1	1	1	1	1	1	1	1	1	1	1	1	1	1	1	1	1	1	1	1	1	1	1	1	1
AX-176823875	Araip.B08	122019103	0	0	2	2	2	1	1	1	1	1	1	1	1	1	1	1	1	1	1	1	1	1	1	1	1	1	1	1	1	1	1	1	1	1	1	1	1	1	1	1	1	1
AX-176823918	Araip.B08	1604444	2	2	0	0	0	1	1	1	1	1	1	1	1	1	1	1	1	1	1	1	1	1	1	1	1	1	1	1	1	1	1	1	1	1	1	1	1	1	1	1	1	1
AX-176824000	Araip.B01	130289404	0	0	2	2	2	1	1	1	1	1	1	1	1	1	1	1	1	1	1	1	1	1	1	1	1	1	1	1	1	1	1	1	1	1	1	1	1	1	1	1	1	1
AX-176824013	Araip.B09	12033754	2	2	0	0	0	1	1	1	1	1	1	1	1	1	1	1	1	1	1	1	1	1	1	1	1	1	1	1	1	1	1	1	1	1	1	1	1	1	1	1	1	1
AX-176824028	Araip.B08	9115716	0	0	2	2	2	1	1	1	1	1	1	1	1	1	1	1	1	1	1	1	1	1	1	1	1	1	1	1	1	1	1	1	1	1	1	1	1	1	1	1	1	1
AX-176824210	Araip.B09	144312990	2	2	0	0	0	1	1	1	1	1	1	1	1	1	1	1	1	1	1	1	1	1	1	1	1	1	1	1	1	1	1	1	1	1	1	1	1	1	1	1	1	1
AX-176824235	Araip.B07	33605454	0	0	2	2	2	1	1	1	1	1	1	1	1	1	1	1	1	1	1	1	1	1	1	1	1	1	1	1	1	1	1	1	1	1	1	1	1	1	1	1	1	1
AX-177637124	Araip.B09	54431240	0	0	2	2	2	1	1	1	1	1	1	1	1	1	1	1	1	1	1	1	1	1	1	1	1	1	1	1	1	1	1	1	1	1	1	1	1	1	1	1	1	1
AX-177637169	Araip.B08	101392090	0	0	2	2	2	1	1	1	1	1	1	1	1	1	1	1	1	1	1	1	1	1	1	1	1	1	1	1	1	1	1	1	1	1	1	1	1	1	1	1	1	1
AX-177637177	Araip.B07	58642890	0	0	2	2	2	1	1	1	1	1	1	1	1	1	1	1	1	1	1	1	1	1	1	1	1	1	1	1	1	1	1	1	1	1	1	1	1	1	1	1	1	1
AX-177637200	Araip.B08	8139763	0	0	2	2	2	1	1	1	1	1	1	1	1	1	1	1	1	1	1	1	1	1	1	1	1	1	1	1	1	1	1	1	1	1	1	1	1	1	1	1	1	1
AX-177637214	Araip.B07	122951886	0	0	2	2	2	1	1	1	1	1	1	1	1	1	1	1	1	1	1	1	1	1	1	1	1	1	1	1	1	1	1	1	1	1	1	1	1	1	1	1	1	1
AX-177637283	Araip.B08	8298166	0	0	2	2	2	1	1	1	1	1	1	1	1	1	1	1	1	1	1	1	1	1	1	1	1	1	1	1	1	1	1	1	1	1	1	1	1	1	1	1	1	1
AX-177637301	Araip.B08	92419476	0	0	2	2	2	1	1	1	1	1	1	1	1	1	1	1	1	1	1	1	1	1	1	1	1	1	1	1	1	1	1	1	1	1	1	1	1	1	1	1	1	1
AX-177637514	Araip.B08	14729954	0	0	2	2	2	1	1	1	1	1	1	1	1	1	1	1	1	1	1	1	1	1	1	1	1	1	1	1	1	1	1	1	1	1	1	1	1	1	1	1	1	1
AX-177637552	Araip.B10	9107539	0	0	2	2	2	1	1	1	1	1	1	1	1	1	1	1	1	1	1	1	1	1	1	1	1	1	1	1	1	1	1	1	1	1	1	1	1	1	1	1	1	1
AX-177637574	Araip.B07	108490179	0	0	2	2	2	1	1	1	1	1	1	1	1	1	1	1	1	1	1	1	1	1	1	1	1	1	1	1	1	1	1	1	1	1	1	1	1	1	1	1	1	1
AX-177637601	Araip.B10	103487554	0	0	2	2	2	1	1	1	1	1	1	1	1	1	1	1	1	1	1	1	1	1	1	1	1	1	1	1	1	1	1	1	1	1	1	1	1	1	1	1	1	1
AX-177637602	Araip.B09	139031313	2	2	0	0	0	1	1	1	1	1	1	1	1	1	1	1	1	1	1	1	1	1	1	1	1	1	1	1	1	1	1	1	1	1	1	1	1	1	1	1	1	1
AX-177637608	Araip.B07	65508685	2	2	0	0	0	1	1	1	1	1	1	1	1	1	1	1	1	1	1	1	1	1	1	1	1	1	1	1	1	1	1	1	1	1	1	1	1	1	1	1	1	1
AX-177637614	Araip.B09	1969800	0	0	2	2	2	1	1	1	1	1	1	1	1	1	1	1	1	1	1	1	1	1	1	1	1	1	1	1	1	1	1	1	1	1	1	1	1	1	1	1	1	1
AX-177637637	Araip.B09	1967354	2	2	0	0	0	1	1	1	1	1	1	1	1	1	1	1	1	1	1	1	1	1	1	1	1	1	1	1	1	1	1	1	1	1	1	1	1	1	1	1	1	1
AX-177637648	Araip.B10	111329372	0	0	2	2	2	1	1	1	1	1	1	1	1	1	1	1	1	1	1	1	1	1	1	1	1	1	1	1	1	1	1	1	1	1	1	1	1	1	1	1	1	1
AX-177637668	Araip.B10	124729038	0	0	2	2	2	1	1	1	1	1	1	1	1	1	1	1	1	1	1	1	1	1	1	1	1	1	1	1	1	1	1	1	1	1	1	1	1	1	1	1	1	1
AX-177637682	Araip.B07	52576684	0	0	2	2	2	1	1	1	1	1	1	1	1	1	1	1	1	1	1	1	1	1	1	1	1	1	1	1	1	1	1	1	1	1	1	1	1	1	1	1	1	1
AX-177637684	Araip.B08	54218503	0	0	2	2	2	1	1	1	1	1	1	1	1	1	1	1	1	1	1	1	1	1	1	1	1	1	1	1	1	1	1	1	1	1	1	1	1	1	1	1	1	1
AX-177637691	Araip.B10	106306202	0	0	2	2	2	1	1	1	1	1	1	1	1	1	1	1	1	1	1	1	1	1	1	1	1	1	1	1	1	1	1	1	1	1	1	1	1	1	1	1	1	1
AX-177637730	Araip.B09	11364824	0	0	2	2	2	1	1	1	1	1	1	1	1	1	1	1	1	1	1	1	1	1	1	1	1	1	1	1	1	1	1	1	1	1	1	1	1	1	1	1	1	1
AX-177637763	Araip.B09	10926012	2	2	0	0	0	1	1	1	1	1	1	1	1	1	1	1	1	1	1	1	1	1	1	1	1	1	1	1	1	1	1	1	1	1	1	1	1	1	1	1	1	1
AX-177637842	Araip.B09	24415822	0	0	2	2	2	1	1	1	1	1	1	1	1	1	1	1	1	1	1	1	1	1	1	1	1	1	1	1	1	1	1	1	1	1	1	1	1	1	1	1	1	1
AX-177637843	Araip.B08	9469566	0	0	2	2	2	1	1	1	1	1	1	1	1	1	1	1	1	1	1	1	1	1	1	1	1	1	1	1	1	1	1	1	1	1	1	1	1	1	1	1	1	1
AX-177637889	Araip.B09	22716885	0	0	2	2	2	1	1	1	1	1	1	1	1	1	1	1	1	1	1	1	1	1	1	1	1	1	1	1	1	1	1	1	1	1	1	1	1	1	1	1	1	1
AX-177637938	Araip.B07	22140106	0	0	2	2	2	1	1	1	1	1	1	1	1	1	1	1	1	1	1	1	1	1	1	1	1	1	1	1	1	1	1	1	1	1	1	1	1	1	1	1	1	1
AX-177637990	Araip.B09	14198288	0	0	2	2	2	1	1	1	1	1	1	1	1	1	1	1	1	1	1	1	1	1	1	1	1	1	1	1	1	1	1	1	1	1	1	1	1	1	1	1	1	1
AX-177638018	Araip.B08	112078475	0	0	2	2	2	1	1	1	1	1	1	1	1	1	1	1	1	1	1	1	1	1	1	1	1	1	1	1	1	1	1	1	1	1	1	1	1	1	1	1	1	1
AX-177638061	Aradu.A08	40453920	2	2	0	0	0	1	1	1	1	1	1	1	1	1	1	1	1	1	1	1	1	1	1	1	1	1	1	1	1	1	1	1	1	1	1	1	1	1	1	1	1	1
AX-177638083	Araip.B09	125395376	0	0	2	2	2	1	1	1	1	1	1	1	1	1	1	1	1	1	1	1	1	1	1	1	1	1	1	1	1	1	1	1	1	1	1	1	1	1	1	1	1	1
AX-177638121	Araip.B09	136677419	0	0	2	2	2	1	1	1	1	1	1	1	1	1	1	1	1	1	1	1	1	1	1	1	1	1	1	1	1	1	1	1	1	1	1	1	1	1	1	1	1	1
AX-177638130	Araip.B09	49517531	0	0	2	2	2	1	1	1	1	1	1	1	1	1	1	1	1	1	1	1	1	1	1	1	1	1	1	1	1	1	1	1	1	1	1	1	1	1	1	1	1	1
AX-177638143	Araip.B10	28559598	2	2	0	0	0	1	1	1	1	1	1	1	1	1	1	1	1	1	1	1	1	1	1	1	1	1	1	1	1	1	1	1	1	1	1	1	1	1	1	1	1	1
AX-177638150	Araip.B08	108958569	0	0	2	2	2	1	1	1	1	1	1	1	1	1	1	1	1	1	1	1	1	1	1	1	1	1	1	1	1	1	1	1	1	1	1	1	1	1	1	1	1	1
AX-177638250	Araip.B09	32467198	0	0	2	2	2	1	1	1	1	1	1	1	1	1	1	1	1	1	1	1	1	1	1	1	1	1	1	1	1	1	1	1	1	1	1	1	1	1	1	1	1	1
AX-177638255	Araip.B10	98415403	0	0	2	2	2	1	1	1	1	1	1	1	1	1	1	1	1	1	1	1	1	1	1	1	1	1	1	1	1	1	1	1	1	1	1	1	1	1	1	1	1	1
AX-177638260	Araip.B09	35767700	0	0	2	2	2	1	1	1	1	1	1	1	1	1	1	1	1	1	1	1	1	1	1	1	1	1	1	1	1	1	1	1	1	1	1	1	1	1	1	1	1	1
AX-177638280	Araip.B10	9003441	0	0	2	2	2	1	1	1	1	1	1	1	1	1	1	1	1	1	1	1	1	1	1	1	1	1	1	1	1	1	1	1	1	1	1	1	1	1	1	1	1	1
AX-177638314	Araip.B09	11742821	0	0	2	2	2	1	1	1	1	1	1	1	1	1	1	1	1	1	1	1	1	1	1	1	1	1	1	1	1	1	1	1	1	1	1	1	1	1	1	1	1	1
AX-177638354	Araip.B08	26253121	0	NoCall	2	2	2	1	1	1	1	1	1	1	1	1	1	1	1	1	1	1	1	1	1	1	1	1	1	1	1	1	1	1	1	1	1	1	1	1	1	1	1	1
AX-177638394	Araip.B10	22671074	0	0	2	2	2	1	1	1	1	1	1	1	1	1	1	1	1	1	1	1	1	1	1	1	1	1	1	1	1	1	1	1	1	1	1	1	1	1	1	1	1	1
AX-177638402	Araip.B08	102830236	0	0	2	2	2	1	1	1	1	1	1	1	1	1	1	1	1	1	1	1	1	1	1	1	1	1	1	1	1	1	1	1	1	1	1	1	1	1	1	1	1	1
AX-177638479	Araip.B10	117985701	0	0	2	2	2	1	1	1	1	1	1	1	1	1	1	1	1	1	1	1	1	1	1	1	1	1	1	1	1	1	1	1	1	1	1	1	1	1	1	1	1	1
AX-177638493	Araip.B10	10054864	0	0	2	2	2	1	1	1	1	1	1	1	1	1	1	1	1	1	1	1	1	1	1	1	1	1	1	1	1	1	1	1	1	1	1	1	1	1	1	1	1	1
AX-177638502	Araip.B07	66373388	0	0	2	2	2	1	1	1	1	1	1	1	1	1	1	1	1	1	1	1	1	1	1	1	1	1	1	1	1	1	1	1	1	1	1	1	1	1	1	1	1	1
AX-177638518	Araip.B10	19222202	0	0	2	2	2	1	1	1	1	1	1	1	1	1	1	1	1	1	1	1	1	1	1	1	1	1	1	1	1	1	1	1	1	1	1	1	1	1	1	1	1	1
AX-177638557	Araip.B10	37301655	0	0	2	2	2	1	1	1	1	1	1	1	1	1	1	1	1	1	1	1	1	1	1	1	1	1	1	1	1	1	1	1	1	1	1	1	1	1	1	1	1	1
AX-177638566	Araip.B10	25384986	0	0	2	2	2	1	1	1	1	1	1	1	1	1	1	1	1	1	1	1	1	1	1	1	1	1	1	1	1	1	1	1	1	1	1	1	1	1	1	1	1	1
AX-177638575	Araip.B10	109217512	0	0	2	2	2	1	1	1	1	1	1	1	1	1	1	1	1	1	1	1	1	1	1	1	1	1	1	1	1	1	1	1	1	1	1	1	1	1	1	1	1	1
AX-177638677	Araip.B10	120214136	0	0	2	2	2	1	1	1	1	1	1	1	1	1	1	1	1	1	1	1	1	1	1	1	1	1	1	1	1	1	1	1	1	1	1	1	1	1	1	1	1	1
AX-177638705	Araip.B08	1170946	2	2	0	0	0	1	1	1	1	1	1	1	1	1	1	1	1	1	1	1	1	1	1	1	1	1	1	1	1	1	1	1	1	1	1	1	1	1	1	1	1	1
AX-177638722	Araip.B08	125966663	0	0	2	2	2	1	1	1	1	1	1	1	1	1	1	1	1	1	1	1	1	1	1	1	1	1	1	1	1	1	1	1	1	1	1	1	1	1	1	1	1	1
AX-177638725	Araip.B09	31274859	0	0	2	2	2	1	1	1	1	1	1	1	1	1	1	1	1	1	1	1	1	1	1	1	1	1	1	1	1	1	1	1	1	1	1	1	1	1	1	1	1	1
AX-177638775	Araip.B09	112134356	0	0	2	2	2	1	1	1	1	1	1	1	1	1	1	1	1	1	1	1	1	1	1	1	1	1	1	1	1	1	1	1	1	1	1	1	1	1	1	1	1	1
AX-177638832	Araip.B09	41312068	0	0	2	2	2	1	1	1	1	1	1	1	1	1	1	1	1	1	1	1	1	1	1	1	1	1	1	1	1	1	1	1	1	1	1	1	1	1	1	1	1	1
AX-177638837	Araip.B10	38048095	0	0	2	2	2	1	1	1	1	1	1	1	1	1	1	1	1	1	1	1	1	1	1	1	1	1	1	1	1	1	1	1	1	1	1	1	1	1	1	1	1	1
AX-177638866	Araip.B09	125207634	0	0	2	2	2	1	1	1	1	1	1	1	1	1	1	1	1	1	1	1	1	1	1	1	1	1	1	1	1	1	1	1	1	1	1	1	1	1	1	1	1	1
AX-177638894	Araip.B07	39516133	0	0	2	2	2	1	1	1	1	1	1	1	1	1	1	1	1	1	1	1	1	1	1	1	1	1	1	1	1	1	1	1	1	1	1	1	1	1	1	1	1	1
AX-177638898	Araip.B08	104368192	2	2	0	0	0	1	1	1	1	1	1	1	1	1	1	1	1	1	1	1	1	1	1	1	1	1	1	1	1	1	1	1	1	1	1	1	1	1	1	1	1	1
AX-177638918	Araip.B10	108972652	0	0	2	2	2	1	1	1	1	1	1	1	1	1	1	1	1	1	1	1	1	1	1	1	1	1	1	1	1	1	1	1	1	1	1	1	1	1	1	1	1	1
AX-177638999	Araip.B07	117878241	2	2	0	0	0	1	1	1	1	1	1	1	1	1	1	1	1	1	1	1	1	1	1	1	1	1	1	1	1	1	1	1	1	1	1	1	1	1	1	1	1	1
AX-177639020	Araip.B07	118159940	0	0	2	2	2	1	1	1	1	1	1	1	1	1	1	1	1	1	1	1	1	1	1	1	1	1	1	1	1	1	1	1	1	1	1	1	1	1	1	1	1	1
AX-177639055	Araip.B10	10237400	0	0	2	2	2	1	1	1	1	1	1	1	1	1	1	1	1	1	1	1	1	1	1	1	1	1	1	1	1	1	1	1	1	1	1	1	1	1	1	1	1	1
AX-177639065	Araip.B10	24664937	0	0	2	2	2	1	1	1	1	1	1	1	1	1	1	1	1	1	1	1	1	1	1	1	1	1	1	1	1	1	1	1	1	1	1	1	1	1	1	1	1	1
AX-177639155	Araip.B08	85107455	2	2	0	0	0	1	1	1	1	1	1	1	1	1	1	1	1	1	1	1	1	1	1	1	1	1	1	1	1	1	1	1	1	1	1	1	1	1	1	1	1	1
AX-177639219	Araip.B10	29252857	0	0	2	2	2	1	1	1	1	1	1	1	1	1	1	1	1	1	1	1	1	1	1	1	1	1	1	1	1	1	1	1	1	1	1	1	1	1	1	1	1	1
AX-177639236	Araip.B10	3475985	2	2	0	0	0	1	1	1	1	1	1	1	1	1	1	1	1	1	1	1	1	1	1	1	1	1	1	1	1	1	1	1	1	1	1	1	1	1	1	1	1	1
AX-177639284	Araip.B09	122815913	0	0	2	2	2	1	1	1	1	1	1	1	1	1	1	1	1	1	1	1	1	1	1	1	1	1	1	1	1	1	1	1	1	1	1	1	1	1	1	1	1	1
AX-177639344	Araip.B09	11477865	2	2	0	0	0	1	1	1	1	1	1	1	1	1	1	1	1	1	1	1	1	1	1	1	1	1	1	1	1	1	1	1	1	1	1	1	1	1	1	1	1	1
AX-177639360	Araip.B10	17531258	0	0	2	2	2	1	1	1	1	1	1	1	1	1	1	1	1	1	1	1	1	1	1	1	1	1	1	1	1	1	1	1	1	1	1	1	1	1	1	1	1	1
AX-177639493	Araip.B10	43304002	0	0	2	2	2	1	1	1	1	1	1	1	1	1	1	1	1	1	1	1	1	1	1	1	1	1	1	1	1	1	1	1	1	1	1	1	1	1	1	1	1	1
AX-177639515	Araip.B10	111779220	0	0	2	2	2	1	1	1	1	1	1	1	1	1	1	1	1	1	1	1	1	1	1	1	1	1	1	1	1	1	1	1	1	1	1	1	1	1	1	1	1	1
AX-177639567	Araip.B10	110673150	0	0	2	2	2	1	1	1	1	1	1	1	1	1	1	1	1	1	1	1	1	1	1	1	1	1	1	1	1	1	1	1	1	1	1	1	1	1	1	1	1	1
AX-177639569	Araip.B09	39652114	0	0	2	2	2	1	1	1	1	1	1	1	1	1	1	1	1	1	1	1	1	1	1	1	1	1	1	1	1	1	1	1	1	1	1	1	1	1	1	1	1	1
AX-177639581	Araip.B10	103728395	0	0	2	2	2	1	1	1	1	1	1	1	1	1	1	1	1	1	1	1	1	1	1	1	1	1	1	1	1	1	1	1	1	1	1	1	1	1	1	1	1	1
AX-177639651	Araip.B10	3551737	0	0	2	2	2	1	1	1	1	1	1	1	1	1	1	1	1	1	1	1	1	1	1	1	1	1	1	1	1	1	1	1	1	1	1	1	1	1	1	1	1	1
AX-177639684	Araip.B09	24022080	0	0	2	2	2	1	1	1	1	1	1	1	1	1	1	1	1	1	1	1	1	1	1	1	1	1	1	1	1	1	1	1	1	1	1	1	1	1	1	1	1	1
AX-177639735	Araip.B10	24397256	0	0	2	2	2	1	1	1	1	1	1	1	1	1	1	1	1	1	1	1	1	1	1	1	1	1	1	1	1	1	1	1	1	1	1	1	1	1	1	1	1	1
AX-177639770	Araip.B09	29985356	0	0	2	2	2	1	1	1	1	1	1	1	1	1	1	1	1	1	1	1	1	1	1	1	1	1	1	1	1	1	1	1	1	1	1	1	1	1	1	1	1	1
AX-177639790	Araip.B09	11640961	2	2	0	0	0	1	1	1	1	1	1	1	1	1	1	1	1	1	1	1	1	1	1	1	1	1	1	1	1	1	1	1	1	1	1	1	1	1	1	1	1	1
AX-177639824	Araip.B10	89688200	0	0	2	2	2	1	1	1	1	1	1	1	1	1	1	1	1	1	1	1	1	1	1	1	1	1	1	1	1	1	1	1	1	1	1	1	1	1	1	1	1	1
AX-177639828	Araip.B10	123210518	2	2	0	0	0	1	1	1	1	1	1	1	1	1	1	1	1	1	1	1	1	1	1	1	1	1	1	1	1	1	1	1	1	1	1	1	1	1	1	1	1	1
AX-177639829	Araip.B10	117486029	0	0	2	2	2	1	1	1	1	1	1	1	1	1	1	1	1	1	1	1	1	1	1	1	1	1	1	1	1	1	1	1	1	1	1	1	1	1	1	1	1	1
AX-177639832	Araip.B08	57731971	0	0	2	2	2	1	1	1	1	1	1	1	1	1	1	1	1	1	1	1	1	1	1	1	1	1	1	1	1	1	1	1	1	1	1	1	1	1	1	1	1	1
AX-177639838	Araip.B10	29601447	2	2	0	0	0	1	1	1	1	1	1	1	1	1	1	1	1	1	1	1	1	1	1	1	1	1	1	1	1	1	1	1	1	1	1	1	1	1	1	1	1	1
AX-177639848	Araip.B09	12229427	0	0	2	2	2	1	1	1	1	1	1	1	1	1	1	1	1	1	1	1	1	1	1	1	1	1	1	1	1	1	1	1	1	1	1	1	1	1	1	1	1	1
AX-177640016	Araip.B10	88965257	0	0	2	2	2	1	1	1	1	1	1	1	1	1	1	1	1	1	1	1	1	1	1	1	1	1	1	1	1	1	1	1	1	1	1	1	1	1	1	1	1	1
AX-177640018	Araip.B10	7052534	0	0	2	2	2	1	1	1	1	1	1	1	1	1	1	1	1	1	1	1	1	1	1	1	1	1	1	1	1	1	1	1	1	1	1	1	1	1	1	1	1	1
AX-177640027	Araip.B08	71803509	0	0	2	2	2	1	1	1	1	1	1	1	1	1	1	1	1	1	1	1	1	1	1	1	1	1	1	1	1	1	1	1	1	1	1	1	1	1	1	1	1	1
AX-177640038	Aradu.A10	19877210	0	0	2	2	2	1	1	1	1	1	1	1	1	1	1	1	1	1	1	1	1	1	1	1	1	1	1	1	1	1	1	1	1	1	1	1	1	1	1	1	1	1
AX-177640039	Araip.B09	34602679	2	2	0	0	0	1	1	1	1	1	1	1	1	1	1	1	1	1	1	1	1	1	1	1	1	1	1	1	1	1	1	1	1	1	1	1	1	1	1	1	1	1
AX-177640065	Araip.B10	30797781	0	0	2	2	2	1	1	1	1	1	1	1	1	1	1	1	1	1	1	1	1	1	1	1	1	1	1	1	1	1	1	1	1	1	1	1	1	1	1	1	1	1
AX-177640139	Araip.B07	120268599	0	0	2	2	2	1	1	1	1	1	1	1	1	1	1	1	1	1	1	1	1	1	1	1	1	1	1	1	1	1	1	1	1	1	1	1	1	1	1	1	1	1
AX-177640150	Araip.B08	96965833	0	0	2	2	2	1	1	1	1	1	1	1	1	1	1	1	1	1	1	1	1	1	1	1	1	1	1	1	1	1	1	1	1	1	1	1	1	1	1	1	1	1
AX-177640166	Araip.B07	58640583	0	0	2	2	2	1	1	1	1	1	1	1	1	1	1	1	1	1	1	1	1	1	1	1	1	1	1	1	1	1	1	1	1	1	1	1	1	1	1	1	1	1
AX-177640219	Araip.B08	12829161	0	0	2	2	2	1	1	1	1	1	1	1	1	1	1	1	1	1	1	1	1	1	1	1	1	1	1	1	1	1	1	1	1	1	1	1	1	1	1	1	1	1
AX-177640229	Araip.B08	22939708	0	0	2	2	2	1	1	1	1	1	1	1	1	1	1	1	1	1	1	1	1	1	1	1	1	1	1	1	1	1	1	1	1	1	1	1	1	1	1	1	1	1
AX-177640255	Araip.B08	114984851	0	0	2	2	2	1	1	1	1	1	1	1	1	1	1	1	1	1	1	1	1	1	1	1	1	1	1	1	1	1	1	1	1	1	1	1	1	1	1	1	1	1
AX-177640259	Araip.B08	118487359	0	0	2	2	2	1	1	1	1	1	1	1	1	1	1	1	1	1	1	1	1	1	1	1	1	1	1	1	1	1	1	1	1	1	1	1	1	1	1	1	1	1
AX-177640324	Araip.B08	128986023	2	1	0	0	0	1	1	1	1	1	1	1	1	1	1	1	1	1	1	1	1	1	1	1	1	1	1	1	1	1	1	1	1	1	1	1	1	1	1	1	1	1
AX-177640339	Araip.B09	84563778	0	0	2	2	2	1	1	1	1	1	1	1	1	1	1	1	1	1	1	1	1	1	1	1	1	1	1	1	1	1	1	1	1	1	1	1	1	1	1	1	1	1
AX-177640343	Araip.B08	25469683	0	0	2	2	2	1	1	1	1	1	1	1	1	1	1	1	1	1	1	1	1	1	1	1	1	1	1	1	1	1	1	1	1	1	1	1	1	1	1	1	1	1
AX-177640346	Araip.B10	4339811	2	2	0	0	0	1	1	1	1	1	1	1	1	1	1	1	1	1	1	1	1	1	1	1	1	1	1	1	1	1	1	1	1	1	1	1	1	1	1	1	1	1
AX-177640354	Araip.B09	116892911	0	0	2	2	2	1	1	1	1	1	1	1	1	1	1	1	1	1	1	1	1	1	1	1	1	1	1	1	1	1	1	1	1	1	1	1	1	1	1	1	1	1
AX-177640359	Araip.B09	120670610	2	2	0	0	0	1	1	1	1	1	1	1	1	1	1	1	1	1	1	1	1	1	1	1	1	1	1	1	1	1	1	1	1	1	1	1	1	1	1	1	1	1
AX-177640403	Araip.B10	17407621	0	0	2	2	2	1	1	1	1	1	1	1	1	1	1	1	1	1	1	1	1	1	1	1	1	1	1	1	1	1	1	1	1	1	1	1	1	1	1	1	1	1
AX-177640439	Araip.B10	109610892	2	2	0	0	0	1	1	1	1	1	1	1	1	1	1	1	1	1	1	1	1	1	1	1	1	1	1	1	1	1	1	1	1	1	1	1	1	1	1	1	1	1
AX-177640549	Araip.B08	96400990	0	0	2	2	2	1	1	1	1	1	1	1	1	1	1	1	1	1	1	1	1	1	1	1	1	1	1	1	1	1	1	1	1	1	1	1	1	1	1	1	1	1
AX-177640564	Araip.B09	11478327	2	2	0	0	0	1	1	1	1	1	1	1	1	1	1	1	1	1	1	1	1	1	1	1	1	1	1	1	1	1	1	1	1	1	1	1	1	1	1	1	1	1
AX-177640582	Araip.B09	16055205	0	0	2	2	2	1	1	1	1	1	1	1	1	1	1	1	1	1	1	1	1	1	1	1	1	1	1	1	1	1	1	1	1	1	1	1	1	1	1	1	1	1
AX-177640856	Araip.B08	121657652	0	0	2	2	2	1	1	1	1	1	1	1	1	1	1	1	1	1	1	1	1	1	1	1	1	1	1	1	1	1	1	1	1	1	1	1	1	1	1	1	1	1
AX-177641073	Aradu.A07	6017463	0	0	2	2	2	1	1	1	1	1	1	1	1	1	1	1	1	1	1	1	1	1	1	1	1	1	1	1	1	1	1	1	1	1	1	1	1	1	1	1	1	1
AX-177641303	Araip.B09	143855842	0	0	2	2	2	1	1	1	1	1	1	1	1	1	1	1	1	1	1	1	1	1	1	1	1	1	1	1	1	1	1	1	1	1	1	1	1	1	1	1	1	1
AX-177641921	Aradu.A10	68231998	0	0	2	2	2	1	1	1	1	1	1	1	1	1	1	1	1	1	1	1	1	1	1	1	1	1	1	1	1	1	1	1	1	1	1	1	1	1	1	1	1	1
AX-177642122	Araip.B08	127885613	0	0	2	2	2	1	1	1	1	1	1	1	1	1	1	1	1	1	1	1	1	1	1	1	1	1	1	1	1	1	1	1	1	1	1	1	1	1	1	1	1	1
AX-177642219	Araip.B10	14805583	2	2	0	0	0	1	1	1	1	1	1	1	1	1	1	1	1	1	1	1	1	1	1	1	1	1	1	1	1	1	1	1	1	1	1	1	1	1	1	1	1	1
AX-177642266	Araip.B09	46477152	0	0	2	2	2	1	1	1	1	1	1	1	1	1	1	1	1	1	1	1	1	1	1	1	1	1	1	1	1	1	1	1	1	1	1	1	1	1	1	1	1	1
AX-177643227	Araip.B09	144125576	0	0	2	2	2	1	1	1	1	1	1	1	1	1	1	1	1	1	1	1	1	1	1	1	1	1	1	1	1	1	1	1	1	1	1	1	1	1	1	1	1	1
AX-177643444	Araip.B10	47757413	0	0	2	2	2	1	1	1	1	1	1	1	1	1	1	1	1	1	1	1	1	1	1	1	1	1	1	1	1	1	1	1	1	1	1	1	1	1	1	1	1	1
AX-177643651	Araip.B09	9496312	0	0	2	2	2	1	1	1	1	1	1	1	1	1	1	1	1	1	1	1	1	1	1	1	1	1	1	1	1	1	1	1	1	1	1	1	1	1	1	1	1	1
AX-177643658	Aradu.A01	1005814	2	2	0	0	0	1	1	1	1	1	1	1	1	1	1	1	1	1	1	1	1	1	1	1	1	1	1	1	1	1	1	1	1	1	1	1	1	1	1	1	1	1
AX-177644524	Aradu.A03	126010360	NoCall	NoCall	0	0	0	1	1	1	1	1	1	1	1	1	1	1	1	1	1	1	1	1	1	1	1	1	1	1	1	1	1	1	1	1	1	1	1	1	1	1	1	1
AX-177644591	Araip.B07	102381907	0	0	2	2	2	1	1	1	1	1	1	1	1	1	1	1	1	1	1	1	1	1	1	1	1	1	1	1	1	1	1	1	1	1	1	1	1	1	1	1	1	1

## Sheet: Table S4
Table S4. Homoeologous recombination events in F1 hybrids derived from A. hypogaea x IpaCor4x_S0 crosses. Red font events were inherited from the IpaCor4x_S0 male parents.
										1	2	3	4,5,6,		23					24	7	9			10,25		11,12						8	13,26			14	19,20,27	15	21,22			18	16,17
The yellow highlighted two F1 hybrids were the mother plants producing the two F2 populations genotyped in this study.
probeset_id	Chr_id	SNP position	Ipa	Cor	13-1014	13-2113	IpaCor4x_S0:2	IpaCor4x_S0:5	IpaCor4x_S0:6	13-1014 x IpaCor4x_S0:2_F1:1	13-1014 x IpaCor4x_S0:2_F1:2	13-2113 x IpaCor4x_S0:2_F1:3	13-2113 x IpaCor4x_S0:2_F1:6	13-2113 x IpaCor4x_S0:2_F1:1	13-2113 x IpaCor4x_S0:2_F1:2	13-2113 x IpaCor4x_S0:2_F1:4	13-2113 x IpaCor4x_S0:2_F1:5	13-1014 x IpaCor4x_S0:2_F1:6	13-1014 x IpaCor4x_S0:2_F1:3	13-1014 x IpaCor4x_S0:2_F1:4	13-1014 x IpaCor4x_S0:5_F1:1	13-2113 x IpaCor4x_S0:5_F1:1	13-2113 x IpaCor4x_S0:5_F1:8	13-1014 x IpaCor4x_S0:5_F1:2	13-2113 x IpaCor4x_S0:5_F1:2	13-1014 x IpaCor4x_S0:5_F1:3	13-2113 x IpaCor4x_S0:5_F1:3	13-1014 x IpaCor4x_S0:5_F1:4	13-2113 x IpaCor4x_S0:5_F1:4	13-1014 x IpaCor4x_S0:5_F1:5	13-1014 x IpaCor4x_S0:5_F1:6	13-2113 x IpaCor4x_S0:5_F1:6	13-1014 x IpaCor4x_S0:5_F1:7	13-2113 x IpaCor4x_S0:5_F1:7	13-1014 x IpaCor4x_S0:5_F1:8	13-1014 x IpaCor4x_S0:5_F1:9	13-1014 x IpaCor4x_S0:6_F1:1	13-2113 x IpaCor4x_S0:6_F1:1	13-1014 x IpaCor4x_S0:6_F1:2	13-2113 x IpaCor4x_S0:6_F1:2	13-1014 x IpaCor4x_S0:6_F1:3	13-2113 x IpaCor4x_S0:6_F1:3	13-1014 x IpaCor4x_S0:6_F1:7	13-1014 x IpaCor4x_S0:6_F1:4	13-1014 x IpaCor4x_S0:6_F1:6	13-1014 x IpaCor4x_S0:6_F1:8
AX-147239793	Araip.B02	295929	2	0	1	1	1	1	1	1	1	1	1	1	1	1	1	1	1	1	1	1	1	1	1	1	1	1	1	1	1	1	75% of 0	1	1	1	1	1	1	1	1	1	75% of 0	1	1	1
AX-147212145	Araip.B02	427009	0	2	1	1	1	1	1	1	1	1	1	1	1	1	1	1	1	1	1	1	1	1	1	1	1	1	1	1	1	1	75% of 2	1	1	1	1	1	1	1	1	1	75% of 2	1	1	1
AX-147212209	Araip.B02	720893	0	2	1	1	1	1	1	1	1	1	1	1	1	1	1	1	1	1	1	1	1	1	1	1	1	1	1	1	1	1	75% of 2	1	1	1	1	1	1	1	1	1	75% of 2	1	1	1
AX-147212201	Araip.B02	762970	2	0	1	1	1	1	1	1	1	1	1	1	1	1	1	1	1	1	1	1	1	1	1	1	1	1	1	1	1	1	75% of 0	1	1	1	1	1	1	1	1	1	75% of 0	1	1	1
AX-147212493	Araip.B02	778790	0	2	1	1	1	1	1	1	1	1	1	1	1	1	1	1	1	1	1	1	1	1	1	1	1	1	1	1	1	1	75% of 2	1	1	1	1	1	1	1	1	1	75% of 2	1	1	1
AX-147212508	Araip.B02	876617	0	2	1	1	1	1	1	1	1	1	1	1	1	1	1	1	1	1	1	1	1	1	1	1	1	1	1	1	1	1	75% of 2	1	1	1	1	1	1	1	1	1	75% of 2	1	1	1
AX-147212540	Araip.B02	1144632	0	2	1	1	1	1	1	1	1	1	1	1	1	1	1	1	1	1	1	1	1	1	1	1	1	1	1	1	1	1	75% of 2	1	1	1	1	1	1	1	1	1	75% of 2	1	1	1
AX-147240063	Araip.B02	1522075	0	2	1	1	1	1	1	1	1	1	1	1	1	1	1	1	1	1	1	1	1	1	1	1	1	1	1	1	1	1	75% of 2	1	1	1	1	1	1	1	1	1	75% of 2	1	1	1
AX-147240098	Araip.B02	1712223	2	0	1	1	1	1	1	1	1	1	1	1	1	1	1	1	1	1	1	1	1	1	1	1	2	1	1	1	1	1	75% of 0	1	1	1	1	1	1	1	1	1	75% of 0	1	1	1
AX-147240100	Araip.B02	1712926	0	2	1	1	1	1	1	1	1	1	1	1	1	1	1	1	1	1	1	1	1	1	1	1	1	1	1	1	1	1	75% of 2	1	1	1	1	1	1	1	1	1	75% of 2	1	1	1
AX-147240101	Araip.B02	1712937	0	2	1	1	1	1	1	1	1	1	1	1	1	1	1	1	1	1	1	1	1	1	1	1	1	1	1	1	1	1	75% of 2	1	1	1	1	1	1	1	1	1	75% of 2	1	1	1
AX-147212637	Araip.B02	1768625	2	0	1	1	1	1	1	1	1	1	1	1	1	1	1	1	1	1	1	1	1	1	1	1	1	1	1	1	1	1	75% of 0	1	1	1	1	1	1	1	1	1	75% of 0	1	1	1
AX-147240127	Araip.B02	1820840	2	0	1	1	1	1	1	1	1	1	1	1	1	1	1	1	1	1	1	1	1	1	1	1	1	1	1	1	1	1	75% of 0	1	1	1	1	1	1	1	1	1	75% of 0	1	1	1
AX-176823211	Araip.B02	1930331	0	2	1	1	1	1	1	1	1	1	1	1	1	1	1	1	1	1	1	1	1	1	1	1	1	1	1	1	1	1	75% of 2	1	1	1	1	1	1	1	1	1	75% of 2	1	1	1
AX-147240152	Araip.B02	1931837	2	0	1	1	1	1	1	1	1	1	1	1	1	1	1	1	1	1	1	1	1	1	1	1	1	1	1	1	1	1	75% of 0	1	1	1	1	1	1	1	1	1	75% of 0	1	1	1
AX-147212685	Araip.B02	1980848	0	2	1	1	1	1	1	1	1	1	1	1	1	1	1	1	1	1	1	1	1	1	1	1	1	1	1	1	1	1	75% of 2	1	1	1	1	1	1	1	1	1	75% of 2	1	1	1
AX-147240222	Araip.B02	2146791	2	0	1	1	1	1	1	1	1	1	1	1	1	1	1	1	1	1	1	1	1	1	1	1	1	1	1	1	1	1	75% of 0	1	1	1	1	1	1	1	1	1	75% of 0	1	1	1
AX-147240231	Araip.B02	2168047	0	2	1	1	1	1	1	1	1	1	1	1	1	1	1	1	1	1	1	1	1	1	1	1	1	1	1	1	1	1	75% of 2	1	1	1	1	1	1	1	1	1	75% of 2	1	1	1
AX-147212754	Araip.B02	2173827	0	2	1	1	1	1	1	1	1	1	1	1	1	1	1	1	1	1	1	1	1	1	1	1	1	1	1	1	1	1	75% of 2	1	1	1	1	1	1	1	1	1	75% of 2	1	1	1
AX-147240270	Araip.B02	2279487	2	0	1	1	1	1	1	1	1	1	1	1	1	1	1	1	1	1	1	1	1	1	1	1	1	1	1	1	1	1	75% of 0	1	1	1	1	1	1	1	1	1	75% of 0	1	1	1
AX-147240275	Araip.B02	2289416	2	0	1	1	1	1	1	1	1	1	1	1	1	1	1	1	1	1	1	1	1	1	1	1	1	1	1	1	1	1	75% of 0	1	1	1	1	1	1	1	1	1	75% of 0	1	1	1
AX-147240355	Araip.B02	2711493	2	0	1	1	1	1	1	1	1	1	1	1	1	1	1	1	1	1	1	1	1	1	1	1	1	1	1	1	1	1	75% of 0	1	1	1	1	1	1	1	1	1	75% of 0	1	1	1
AX-147212872	Araip.B02	5049555	0	2	1	1	1	1	1	1	1	1	1	1	1	1	1	1	1	1	1	1	1	1	1	1	1	1	1	1	1	1	75% of 2	1	1	1	1	1	1	1	1	1	75% of 2	1	1	1
AX-147240628	Araip.B02	6713961	2	0	1	1	1	1	1	1	1	1	1	1	1	1	1	1	1	1	1	1	1	1	1	1	1	1	1	1	1	1	75% of 0	1	1	1	1	1	1	1	1	1	75% of 0	1	1	1
AX-147240638	Araip.B02	6787979	0	2	1	1	1	1	1	1	1	1	1	1	1	1	1	1	1	1	1	1	1	1	1	1	1	1	1	1	1	1	75% of 2	1	1	1	1	1	1	1	1	1	75% of 2	1	1	1
AX-147240685	Araip.B02	7728370	2	0	1	1	1	1	1	1	1	1	1	1	1	1	1	1	1	1	1	1	1	1	1	1	1	1	1	1	1	1	75% of 0	1	1	1	1	1	1	1	1	1	75% of 0	1	1	1
AX-147240686	Araip.B02	7755181	2	0	1	1	1	1	1	1	1	1	1	1	1	1	1	1	1	1	1	1	1	1	1	1	1	1	1	1	1	1	75% of 0	1	1	1	1	1	1	1	1	1	75% of 0	1	1	1
AX-147240689	Araip.B02	7756016	2	0	1	1	1	1	1	1	1	1	1	1	1	1	1	1	1	1	1	1	1	1	1	1	1	1	1	1	1	1	75% of 0	1	1	1	1	1	1	1	1	1	75% of 0	1	1	1
AX-147240698	Araip.B02	7790917	2	0	1	1	1	1	1	1	1	1	1	1	1	1	1	1	1	1	1	1	1	1	1	1	1	1	1	1	1	1	75% of 0	1	1	1	1	1	1	1	1	1	75% of 0	1	1	1
AX-147213098	Araip.B02	7813591	2	0	1	1	1	1	1	1	1	1	1	1	1	1	1	1	1	1	1	1	1	1	1	1	1	1	1	1	1	1	1	1	1	1	1	1	1	1	1	1	75% of 0	1	1	1
AX-147240706	Araip.B02	7884930	2	0	1	1	1	1	1	1	1	1	1	1	1	1	1	1	1	1	1	1	1	1	1	1	1	1	1	1	1	1	75% of 0	1	1	1	1	1	1	1	1	1	75% of 0	1	1	1
AX-147240759	Araip.B02	9328159	0	2	1	1	1	1	1	1	1	1	1	1	1	1	1	1	1	1	1	1	1	1	1	1	1	1	1	1	1	1	75% of 2	1	1	1	1	1	1	1	1	1	75% of 2	1	1	1
AX-147240763	Araip.B02	9537998	0	2	1	1	1	1	1	1	1	1	1	1	1	1	1	1	1	1	1	1	1	1	1	1	1	1	1	1	1	1	75% of 2	1	1	1	1	1	1	1	1	1	75% of 2	1	1	1
AX-147213188	Araip.B02	9567956	0	2	1	1	1	1	1	1	1	1	1	1	1	1	1	1	1	1	1	1	1	1	1	1	1	1	1	1	1	1	75% of 2	1	1	1	1	1	1	1	1	1	75% of 2	1	1	1
AX-147213235	Araip.B02	10699834	0	2	1	1	1	1	1	1	1	1	1	1	1	1	1	1	1	1	1	1	1	1	1	1	1	1	1	1	1	1	75% of 2	1	1	1	1	1	1	1	1	1	75% of 2	1	1	1
AX-147240812	Araip.B02	10842032	0	2	1	1	1	1	1	1	1	1	1	1	1	1	1	1	1	1	1	1	1	1	1	1	1	1	1	1	1	1	75% of 2	1	1	1	1	1	1	1	1	1	75% of 2	1	1	1
AX-147240890	Araip.B02	13143424	2	0	1	1	1	1	1	1	1	1	1	1	1	1	1	1	1	1	1	1	1	1	1	1	1	1	1	1	1	1	75% of 0	1	1	1	1	1	1	1	1	1	75% of 0	1	1	1
AX-147240910	Araip.B02	13504920	2	0	1	1	1	1	1	1	1	1	1	1	1	1	1	1	1	1	1	1	1	1	1	1	1	1	1	1	1	1	75% of 0	1	1	1	1	1	1	1	1	1	75% of 0	1	1	1
AX-147240919	Araip.B02	13624642	2	0	1	1	1	1	1	1	1	1	1	1	1	1	1	1	1	1	1	1	1	1	1	1	1	1	1	1	1	1	75% of 0	1	1	1	1	1	1	1	1	1	75% of 0	1	1	1
AX-147240923	Araip.B02	13720847	0	2	1	1	1	1	1	1	1	1	1	1	1	1	1	1	1	1	1	1	1	1	1	1	1	1	1	1	1	1	75% of 2	1	1	1	1	1	1	1	1	1	75% of 2	1	1	1
AX-147240947	Araip.B02	14430205	0	2	1	1	1	1	1	1	1	1	1	1	1	1	1	1	1	1	1	1	1	1	1	1	1	1	1	1	1	1	75% of 2	1	1	1	1	1	1	1	1	1	75% of 2	1	1	1
AX-147240951	Araip.B02	14807406	0	2	1	1	1	1	1	1	1	1	1	1	1	1	1	1	1	1	1	1	1	1	1	1	1	1	1	1	1	1	75% of 2	1	1	1	1	1	1	1	1	1	75% of 2	1	1	1
AX-147213407	Araip.B02	15620788	0	2	1	1	1	1	1	1	1	1	1	1	1	1	1	1	1	1	1	1	1	1	1	1	1	1	1	1	1	1	75% of 2	1	1	1	1	1	1	1	1	1	75% of 2	1	1	1
AX-147240990	Araip.B02	17066417	0	2	1	1	1	1	1	1	1	1	1	1	1	1	1	1	1	1	1	1	1	1	1	1	1	1	1	1	1	1	75% of 2	1	1	1	1	1	1	1	1	1	75% of 2	1	1	1
AX-147241077	Araip.B02	21205597	2	0	1	1	1	1	1	1	1	1	1	1	1	1	1	1	1	1	1	1	1	1	1	1	1	1	1	1	1	1	75% of 0	1	1	1	1	1	1	1	1	1	75% of 0	1	1	1
AX-147213561	Araip.B02	23654102	0	2	1	1	1	1	1	1	1	1	1	1	1	1	1	1	1	1	1	1	1	1	1	1	1	1	1	1	1	1	75% of 2	1	1	1	1	1	1	1	1	1	75% of 2	1	1	1
AX-147241142	Araip.B02	24395340	2	0	1	1	1	1	1	1	1	1	1	1	1	1	1	1	1	1	1	1	1	1	1	1	1	1	1	1	1	1	75% of 0	1	1	1	1	1	1	1	1	1	75% of 0	1	1	1
AX-147241152	Araip.B02	24748745	2	0	1	1	1	1	1	1	1	1	1	1	1	1	1	1	1	1	1	1	1	1	1	1	1	1	1	1	1	1	75% of 0	1	1	1	1	1	1	1	1	1	75% of 0	1	1	1
AX-147241155	Araip.B02	25830427	2	0	1	1	1	1	1	1	1	1	1	1	1	1	1	1	1	1	1	1	1	1	1	1	1	1	1	1	1	1	75% of 0	1	1	1	1	1	1	1	1	1	75% of 0	1	1	1
AX-147213597	Araip.B02	26043373	0	2	1	1	1	1	1	1	1	1	1	1	1	1	1	1	1	1	1	1	1	1	1	1	1	1	1	1	1	1	75% of 2	1	1	1	1	1	1	1	1	1	75% of 2	1	1	1
AX-147241184	Araip.B02	27678597	2	0	1	1	1	1	1	1	1	1	1	1	1	1	1	1	1	1	1	1	1	1	1	1	1	1	1	1	1	1	75% of 0	1	1	1	1	1	1	1	1	1	75% of 0	1	1	1
AX-147241185	Araip.B02	28065886	2	0	1	1	1	1	1	1	1	1	1	1	1	1	1	1	1	1	1	1	1	1	1	1	1	1	1	1	1	1	75% of 0	1	1	1	1	1	1	1	1	1	75% of 0	1	1	1
AX-147213619	Araip.B02	29319993	0	2	1	1	1	1	1	1	1	1	1	1	1	1	1	1	1	1	1	1	1	1	1	1	1	1	1	1	1	1	75% of 2	1	1	1	1	1	1	1	1	1	75% of 2	1	1	1
AX-147213624	Araip.B02	29380797	0	2	1	1	1	1	1	1	1	1	1	1	1	1	1	1	1	1	1	1	1	1	1	1	1	1	1	1	1	1	75% of 2	1	1	1	1	1	1	1	1	1	75% of 2	1	1	1
AX-147241242	Araip.B02	32886431	2	0	1	1	1	1	1	1	1	1	1	1	1	1	1	1	1	1	1	1	1	1	1	1	1	1	1	1	1	1	75% of 0	1	1	1	1	1	1	1	1	1	75% of 0	1	1	1
AX-147241306	Araip.B02	44688308	0	2	1	1	1	1	1	1	1	1	1	1	1	1	1	1	1	1	1	1	1	1	1	1	1	1	1	1	1	1	75% of 2	1	1	1	1	1	1	1	1	1	75% of 2	1	1	1
AX-147241345	Araip.B02	52923347	0	2	1	1	1	1	1	1	1	1	1	1	1	1	1	1	1	1	1	1	1	1	1	1	1	1	1	1	1	1	75% of 2	1	1	1	1	1	1	1	1	1	75% of 2	1	1	1
AX-147241351	Araip.B02	53173493	2	0	1	1	1	1	1	1	1	1	1	1	1	1	1	1	1	1	1	1	1	1	1	1	1	1	1	1	1	1	75% of 0	1	1	1	1	1	1	1	1	1	75% of 0	1	1	1
AX-147241361	Araip.B02	54592541	2	0	1	1	1	1	1	1	1	1	1	1	1	1	1	1	1	1	1	1	1	1	1	1	1	1	1	1	1	1	75% of 0	1	1	1	1	1	1	1	1	1	75% of 0	1	1	1
AX-147213787	Araip.B02	61718684	0	2	1	1	1	1	1	1	1	1	1	1	1	1	1	1	1	1	1	75% of 2	1	1	1	1	1	1	1	1	1	75% of 2	75% of 2	1	1	1	1	1	1	1	1	1	75% of 2	1	1	1
AX-147213681	Araip.B02	62536256	0	2	1	1	1	1	1	1	1	1	1	1	1	1	1	1	1	1	1	1	1	1	1	1	1	1	1	1	1	1	75% of 2	1	1	1	1	1	1	1	1	1	75% of 2	1	1	1
AX-147213680	Araip.B02	62536298	0	2	1	1	1	1	1	1	1	1	1	1	1	1	1	1	1	1	1	75% of 2	1	1	1	1	1	1	1	1	1	1	75% of 2	1	1	1	1	1	1	1	1	1	75% of 2	1	1	1
AX-147241425	Araip.B02	62538102	0	2	1	1	1	1	1	1	1	1	1	1	1	1	1	1	1	1	1	1	1	1	1	1	1	1	1	1	1	1	75% of 2	1	1	1	1	1	1	1	1	1	75% of 2	1	1	1
AX-147241459	Araip.B02	65984837	0	2	1	1	1	1	1	1	1	1	1	1	1	1	1	1	1	1	1	1	1	1	1	1	1	1	1	1	1	1	75% of 2	1	1	1	1	1	1	1	1	1	75% of 2	1	1	1
AX-147213861	Araip.B02	69161878	2	0	1	1	1	1	1	1	1	1	1	1	1	1	1	1	1	1	1	75% of 0	1	1	1	1	1	1	1	1	1	1	75% of 0	1	1	1	1	1	1	1	1	1	75% of 0	1	1	1
AX-147213866	Araip.B02	69324897	2	0	1	1	1	1	1	1	1	1	1	1	1	1	1	1	1	1	1	75% of 0	1	1	1	1	1	1	1	1	1	1	1	1	1	1	1	1	1	1	1	1	75% of 0	1	1	1
AX-147241602	Araip.B02	79579845	0	2	1	1	1	1	1	1	1	1	1	1	1	1	1	1	1	1	1	1	1	1	1	1	1	1	1	1	1	1	75% of 2	1	1	1	1	1	1	1	1	1	75% of 2	1	1	1
AX-147241661	Araip.B02	82700438	2	0	1	1	1	1	1	1	1	1	1	1	1	1	1	1	1	1	1	1	1	1	1	1	1	1	1	1	1	1	75% of 0	1	1	1	1	1	1	1	1	1	75% of 0	1	1	1
AX-147214098	Araip.B02	82900644	0	2	1	1	1	1	1	1	1	1	1	1	1	1	1	1	1	1	1	75% of 2	1	1	1	1	1	1	1	1	1	1	75% of 2	1	1	1	1	1	1	1	1	1	75% of 2	1	1	1
AX-147214165	Araip.B02	86397404	2	0	1	1	1	1	1	1	1	1	1	1	1	1	1	1	1	1	1	75% of 0	1	1	1	1	1	1	1	1	1	1	75% of 0	1	1	1	1	1	1	1	1	1	75% of 0	1	1	1
AX-147241794	Araip.B02	88398141	2	0	1	1	1	1	1	1	1	1	1	1	1	1	1	1	1	1	1	1	1	1	1	1	1	1	1	1	1	1	75% of 0	1	1	1	1	1	1	1	1	1	75% of 0	1	1	1
AX-147241809	Araip.B02	89204585	0	2	1	1	1	1	1	1	1	1	1	1	1	1	1	1	1	1	1	1	1	1	1	1	1	1	1	1	1	1	75% of 2	1	1	1	1	1	1	1	1	1	75% of 2	1	1	1
AX-147214400	Araip.B02	92168064	0	2	1	1	1	1	1	1	1	1	1	1	1	1	1	1	1	1	1	75% of 2	1	1	1	1	1	1	1	1	1	1	75% of 2	1	1	1	1	1	1	1	1	1	75% of 2	1	1	1
AX-147242127	Araip.B02	95247037	2	0	1	1	1	1	1	1	1	1	1	1	1	1	1	1	1	1	1	75% of 0	1	1	1	1	1	1	1	1	1	1	75% of 0	1	1	1	1	1	1	1	1	1	75% of 0	1	1	1
AX-147242131	Araip.B02	95321834	0	2	1	1	1	1	1	1	1	1	1	1	1	1	1	1	1	1	1	75% of 2	1	1	1	1	1	1	1	1	1	1	75% of 2	1	1	1	1	1	1	1	1	1	75% of 2	1	1	1
AX-176792004	Araip.B02	96815622	0	2	1	1	1	1	1	1	1	1	1	1	1	1	1	1	1	1	1	75% of 2	1	1	1	1	1	1	1	1	1	1	1	1	1	1	1	1	1	1	1	1	75% of 2	1	1	1
AX-147214764	Araip.B02	97172231	0	2	1	1	1	1	1	1	1	1	1	1	1	1	1	1	1	1	1	75% of 2	1	1	1	1	1	1	1	1	1	1	1	1	1	1	1	1	1	1	1	1	75% of 2	1	1	1
AX-147214849	Araip.B02	98730421	2	0	1	1	1	1	1	1	1	1	1	1	1	1	1	1	1	1	1	75% of 0	1	1	1	1	1	1	1	1	1	1	1	1	1	1	1	1	1	1	1	1	75% of 0	1	1	1
AX-176791893	Araip.B02	99322510	0	2	1	1	1	1	1	1	1	1	1	1	1	1	1	1	1	1	1	1	1	1	1	1	1	1	1	1	1	1	1	1	1	1	1	1	1	1	1	1	75% of 2	1	1	1
AX-147242292	Araip.B02	99383405	0	2	1	1	1	1	1	1	1	1	1	1	1	1	1	1	1	1	1	1	1	1	1	1	1	1	1	1	1	1	1	1	1	1	1	1	1	1	1	1	NoCall	1	1	1
AX-147214882	Araip.B02	99744790	2	0	1	1	1	1	1	1	1	1	1	1	1	1	1	1	1	1	1	75% of 0	1	1	1	1	1	1	1	1	1	1	1	1	1	1	1	1	1	1	1	1	75% of 0	1	1	1
AX-147242328	Araip.B02	100156381	0	2	1	1	1	1	1	1	1	1	1	1	1	1	1	1	1	1	1	1	1	1	1	1	1	1	1	1	1	1	1	1	1	1	1	1	1	1	1	1	75% of 2	1	1	1
AX-147242333	Araip.B02	100197036	0	2	1	1	1	1	1	1	1	1	1	1	1	1	1	1	1	1	1	75% of 2	1	1	1	1	1	1	1	1	1	1	1	1	1	1	1	1	1	1	1	1	75% of 2	1	1	1
AX-176813562	Araip.B02	100552424	0	2	1	1	1	1	1	1	1	1	1	1	1	1	1	1	1	1	1	75% of 2	1	1	1	1	1	1	1	1	1	1	1	1	1	1	1	1	1	1	1	1	75% of 2	1	1	1
AX-147242366	Araip.B02	100805530	0	2	1	1	1	1	1	1	1	1	1	1	1	1	1	1	1	1	1	75% of 2	1	1	1	1	1	1	1	1	1	1	1	1	1	1	1	1	1	1	1	1	75% of 2	1	1	1
AX-147242434	Araip.B02	101792131	0	2	1	1	1	1	1	1	1	1	1	1	1	1	1	1	1	1	1	1	1	1	1	1	1	1	1	1	1	1	1	1	1	1	1	1	1	1	1	1	75% of 2	1	1	1
AX-176791686	Araip.B02	101793553	0	2	1	1	1	1	1	1	1	1	1	1	1	1	1	1	1	1	1	75% of 2	1	1	1	1	1	1	1	1	1	1	1	1	1	1	1	1	1	1	1	1	75% of 2	1	1	1
AX-147242480	Araip.B02	102453096	0	2	1	1	1	1	1	1	1	1	1	1	1	2	1	1	1	1	1	1	1	1	1	1	1	1	1	1	1	1	1	1	1	1	1	1	1	1	1	1	75% of 2	1	1	1
AX-147215015	Araip.B02	102655016	0	2	1	1	1	1	1	1	1	1	1	1	1	1	1	1	1	1	1	75% of 2	1	1	1	1	1	1	1	1	1	1	1	75% of 2	1	1	1	75% of 2	1	1	1	1	75% of 2	1	1	1
AX-147242515	Araip.B02	103037350	2	0	1	1	1	1	1	1	1	1	1	1	1	1	1	1	1	1	1	1	1	1	1	1	1	1	1	1	1	1	1	1	1	1	1	75% of 0	1	1	1	1	75% of 0	1	1	1
AX-176809346	Araip.B02	103064515	0	2	1	1	1	1	1	1	1	1	1	1	1	1	1	1	1	1	1	1	1	1	1	1	1	1	1	1	1	1	1	1	1	1	1	75% of 2	1	1	1	1	75% of 2	1	1	1
AX-147242547	Araip.B02	103524922	0	2	1	1	1	1	1	1	1	1	1	1	1	1	1	1	1	1	1	1	1	1	1	1	1	1	1	1	1	1	1	1	1	1	1	75% of 2	1	1	1	1	75% of 2	1	1	1
AX-147242587	Araip.B02	104105211	2	0	1	1	1	1	1	1	1	1	1	1	1	1	1	1	1	1	1	1	1	1	1	1	1	1	1	1	1	1	1	1	1	1	1	75% of 0	1	1	1	1	75% of 0	1	1	1
AX-147215080	Araip.B02	104105314	0	2	1	1	1	1	1	1	1	1	1	1	1	1	1	1	1	1	1	75% of 2	1	1	1	1	1	1	1	1	1	1	1	1	1	1	1	75% of 2	1	1	1	1	75% of 2	1	1	1
AX-147215085	Araip.B02	104143220	2	0	1	1	1	1	1	1	1	1	1	1	1	2	2	1	1	1	1	75% of 0	1	1	1	2	1	1	1	1	1	1	1	1	1	1	1	75% of 0	1	1	1	1	75% of 0	1	1	1
AX-147242597	Araip.B02	104269177	2	0	1	1	1	1	1	1	1	1	1	1	1	1	1	1	1	1	1	1	1	1	1	1	1	1	1	1	1	1	1	1	1	1	1	75% of 0	1	1	1	1	75% of 0	1	1	1
AX-147242646	Araip.B02	104599332	0	2	1	1	1	1	1	1	1	1	1	1	1	1	1	1	1	1	1	75% of 2	1	1	1	1	1	1	1	1	1	1	1	1	1	1	1	75% of 2	1	1	1	1	75% of 2	1	1	1
AX-147242707	Araip.B02	105324166	0	2	1	1	1	1	1	1	1	1	1	1	1	1	1	1	1	1	1	75% of 2	1	1	1	1	1	1	1	1	1	1	1	1	1	1	1	1	1	1	1	1	75% of 2	1	1	1
AX-147242711	Araip.B02	105398367	2	0	1	1	1	1	1	1	1	1	1	1	1	1	1	1	1	1	1	1	1	1	1	1	1	1	1	1	1	1	1	1	1	1	1	1	1	1	1	1	75% of 0	1	1	1
AX-147242754	Araip.B02	105795168	2	0	1	1	1	1	1	1	1	1	1	1	1	1	1	1	1	1	75% of 0	1	1	1	1	1	1	1	1	1	1	1	1	1	1	1	1	1	1	1	1	1	75% of 0	1	1	1
AX-147215170	Araip.B02	106109088	0	2	1	NoCall	1	1	1	1	1	1	1	1	1	1	1	1	1	1	1	75% of 2	1	1	1	1	1	1	1	1	1	1	1	1	1	1	1	1	1	1	1	1	75% of 2	1	1	1
AX-147215193	Araip.B02	106229696	2	0	NoCall	1	1	1	1	1	1	1	1	1	1	1	1	1	1	1	1	75% of 0	1	1	1	1	1	1	1	1	1	1	1	1	1	1	1	1	1	1	1	1	75% of 0	1	1	1
AX-147242789	Araip.B02	106235603	0	2	1	1	1	1	1	1	1	1	1	1	1	1	1	1	1	1	75% of 2	75% of 2	1	1	1	1	1	1	1	1	1	1	1	1	1	1	1	1	1	1	1	1	75% of 2	1	1	1
AX-176791866	Araip.B02	106273695	0	2	1	1	1	1	1	1	1	1	1	1	1	1	1	1	1	1	1	1	1	1	1	1	1	1	1	1	1	1	1	1	1	1	1	1	1	1	1	1	75% of 2	1	1	1
AX-176821252	Araip.B03	2029212	2	0	2	2	1	1	1	1	1	1	1	1	1	1	75% of 2	1	1	1	1	1	1	1	1	1	1	1	1	1	1	1	1	1	1	1	1	75% of 0	1	1	1	1	1	1	1	1
AX-147243027	Araip.B03	2045587	2	0	1	1	1	1	1	1	1	1	1	1	1	75% of 2	1	1	1	1	1	1	75% of 2	1	1	1	1	1	1	1	1	1	1	1	1	1	1	75% of 0	1	1	1	1	1	1	1	1
AX-147243031	Araip.B03	2064362	2	0	1	1	1	1	1	1	1	1	1	1	1	1	1	1	1	1	1	1	1	1	1	1	1	1	1	1	1	1	1	1	1	1	1	75% of 0	1	1	1	1	1	1	1	1
AX-147215294	Araip.B03	2287958	2	0	1	1	1	1	1	1	1	1	1	1	1	1	1	1	1	1	1	1	1	1	1	1	1	1	1	1	1	1	1	1	1	1	1	75% of 0	1	1	1	1	1	1	1	1
AX-147215295	Araip.B03	2289326	0	2	1	1	1	1	1	1	1	1	1	1	1	1	1	1	1	1	1	1	1	1	1	1	1	1	1	1	1	1	1	1	1	1	1	75% of 2	1	1	1	1	1	1	1	1
AX-176791680	Araip.B03	2643570	2	0	1	1	1	1	1	1	1	1	1	1	1	1	1	1	1	1	1	1	1	1	1	1	1	1	1	1	1	1	1	1	1	1	1	75% of 0	1	1	1	1	1	1	1	1
AX-147243108	Araip.B03	2720233	0	2	1	1	1	1	1	1	1	1	1	1	1	1	1	1	1	1	1	1	1	1	1	1	1	1	1	1	1	1	1	1	1	1	1	75% of 2	1	1	1	1	1	1	1	1
AX-147243111	Araip.B03	2757923	0	2	1	1	1	1	1	1	1	1	1	1	1	1	1	1	1	1	1	1	1	1	1	1	1	1	1	1	1	1	1	1	1	1	1	75% of 2	1	1	1	1	1	1	1	1
AX-147243174	Araip.B03	3619955	0	2	1	1	1	1	1	1	1	1	1	1	1	1	1	1	1	1	1	1	1	1	1	1	1	1	1	1	1	1	1	1	1	1	1	75% of 2	1	1	1	1	1	1	1	1
AX-147215404	Araip.B03	3706821	2	0	1	1	1	1	1	1	1	1	1	1	1	1	1	1	1	1	1	1	1	1	1	1	1	1	1	1	1	1	1	1	1	1	1	75% of 0	1	1	1	1	1	1	1	1
AX-176791557	Araip.B03	3710551	0	2	1	1	1	1	1	1	1	1	1	1	1	1	1	1	1	1	1	1	1	1	1	1	1	1	1	1	1	1	1	1	1	1	1	75% of 2	1	1	1	1	1	1	1	1
AX-147215418	Araip.B03	3849957	0	2	1	1	1	1	1	1	1	1	1	1	1	1	1	1	1	1	1	1	75% of 0	1	1	1	1	1	1	1	1	1	1	1	1	1	1	1	1	1	1	1	1	1	1	1
AX-147243187	Araip.B03	3850050	2	0	1	1	1	1	1	1	1	1	1	1	1	1	1	1	1	1	1	1	1	1	1	1	1	1	1	1	1	1	1	1	1	1	1	75% of 0	1	1	1	1	1	1	1	1
AX-176797379	Araip.B03	4104588	2	0	1	NoCall	1	1	1	1	1	1	1	1	1	1	1	1	1	1	1	1	1	1	1	1	1	1	1	1	1	1	1	1	1	1	1	75% of 0	1	1	1	1	1	1	1	1
AX-147215468	Araip.B03	4580140	0	2	1	1	1	1	1	1	1	1	1	1	1	1	1	1	1	1	1	1	1	1	1	1	1	1	1	1	1	1	1	1	1	1	1	75% of 2	1	1	1	1	1	1	1	1
AX-147243256	Araip.B03	4859035	0	2	1	1	1	1	1	1	1	1	1	1	1	1	1	1	1	1	1	1	1	1	1	1	1	1	1	1	1	1	1	1	1	1	1	75% of 2	1	1	1	1	1	1	1	1
AX-147243258	Araip.B03	4897332	0	2	1	1	1	1	1	1	1	1	1	1	1	1	1	1	1	1	1	1	1	1	1	1	1	1	1	1	1	1	1	1	1	1	1	75% of 2	1	1	1	1	1	1	1	1
AX-147215507	Araip.B03	5499712	2	0	1	1	1	1	1	1	1	1	1	1	1	1	1	1	1	1	1	1	1	1	1	1	1	1	1	1	1	1	1	1	1	1	1	75% of 0	1	1	1	1	1	1	1	1
AX-147215530	Araip.B03	5933901	2	0	1	1	1	1	1	1	1	1	1	1	1	1	1	1	1	1	1	1	1	1	1	1	1	1	1	1	1	1	1	1	1	1	1	75% of 0	1	1	1	1	1	1	1	1
AX-147215531	Araip.B03	5951334	2	0	1	1	1	1	1	1	1	1	1	1	1	1	1	1	1	1	1	1	1	1	1	1	1	1	1	1	1	1	1	1	1	1	1	75% of 0	1	1	1	1	1	1	1	1
AX-147215556	Araip.B03	6263088	0	2	1	1	1	1	1	1	1	1	1	1	1	1	1	1	1	1	1	1	1	1	1	1	75% of 2	1	1	1	1	1	1	1	1	1	1	75% of 2	1	1	1	1	1	1	1	1
AX-147243360	Araip.B03	6308192	0	2	1	1	1	1	1	1	1	1	1	1	1	1	1	1	1	1	1	1	1	1	1	1	1	1	1	1	1	1	1	1	1	1	1	75% of 2	1	1	1	1	1	1	1	1
AX-147215563	Araip.B03	6442041	0	2	1	1	1	1	1	1	1	1	1	1	1	1	1	1	1	1	1	1	1	1	1	1	1	1	1	1	1	1	1	1	1	1	1	75% of 2	1	1	1	1	1	1	1	1
AX-147243376	Araip.B03	6620680	0	2	1	1	1	1	1	1	1	1	1	1	1	1	1	1	1	1	1	1	1	1	1	1	1	1	1	1	1	1	1	1	1	1	1	75% of 2	1	1	1	1	1	1	1	1
AX-147243378	Araip.B03	6630254	2	0	1	1	1	1	1	1	1	1	1	1	1	1	1	1	1	1	1	1	1	1	1	1	1	1	1	1	1	1	1	1	1	1	1	75% of 0	1	1	1	1	1	1	1	1
AX-147243386	Araip.B03	6739039	2	0	1	1	1	1	1	1	1	1	1	1	1	1	1	1	1	1	1	1	1	1	1	1	1	1	1	1	1	1	1	1	1	1	1	75% of 0	1	1	1	1	1	1	1	1
AX-147246341	Araip.B04	140971	2	0	1	1	1	1	1	75% of 2	1	1	1	1	1	1	1	1	1	1	1	1	1	1	1	1	1	1	1	1	1	1	1	1	1	1	1	1	1	1	1	1	1	1	1	1
AX-147246354	Araip.B04	204623	0	2	1	1	1	1	1	1	1	1	1	1	1	1	1	1	1	1	1	1	1	1	1	1	1	1	1	1	1	1	1	1	1	1	75% of 2	1	1	1	1	1	1	1	1	1
AX-147246402	Araip.B04	605143	0	2	1	1	1	1	1	75% of 0	1	1	1	1	1	1	1	1	1	1	1	1	1	1	1	1	1	1	1	1	1	1	1	1	1	1	75% of 2	1	1	1	1	1	1	75% of 0	1	1
AX-147246405	Araip.B04	613773	2	0	1	1	1	1	1	75% of 2	1	1	1	1	1	1	1	1	1	1	1	1	1	1	1	1	1	1	1	1	1	1	1	1	1	1	75% of 0	1	1	1	1	1	1	75% of 2	1	1
AX-147218775	Araip.B04	647417	0	2	1	1	1	1	1	75% of 0	1	1	1	1	1	1	1	1	1	1	1	1	1	1	1	1	1	1	1	1	1	1	1	1	1	1	75% of 2	1	1	75% of 0	1	1	1	75% of 0	1	1
AX-147218797	Araip.B04	855738	2	0	1	1	1	1	1	1	1	1	1	1	1	1	1	1	1	1	1	1	1	1	1	1	1	1	1	1	1	1	1	1	1	1	75% of 0	1	1	1	1	1	1	75% of 2	1	1
AX-147246438	Araip.B04	939778	2	0	1	1	1	1	1	75% of 2	1	1	1	1	1	1	1	1	1	1	1	1	1	1	1	1	1	1	1	1	1	1	1	1	1	1	75% of 0	1	1	1	1	1	1	75% of 2	1	1
AX-147246450	Araip.B04	998790	0	2	1	1	1	1	1	75% of 0	1	1	1	1	1	1	1	1	1	1	1	1	1	1	1	1	1	1	1	1	1	1	1	1	1	1	75% of 2	1	1	1	1	1	1	75% of 0	1	1
AX-147218827	Araip.B04	1207385	0	2	1	1	1	1	1	75% of 0	1	1	1	1	1	1	1	1	1	1	1	1	1	1	1	1	1	1	1	1	1	1	1	1	1	1	75% of 2	1	1	75% of 0	1	1	1	75% of 0	1	1
AX-147218839	Araip.B04	1299601	2	0	1	1	1	1	1	75% of 2	1	1	1	1	1	1	1	1	1	1	1	1	1	1	1	1	1	1	1	1	1	1	1	1	1	1	75% of 0	1	1	75% of 2	1	1	1	75% of 2	1	1
AX-147246493	Araip.B04	1526345	2	0	1	1	1	1	1	75% of 2	1	1	1	1	1	1	1	1	1	1	1	1	1	1	1	1	1	1	1	1	1	1	1	1	1	1	75% of 0	1	1	1	1	1	1	75% of 2	1	1
AX-147246496	Araip.B04	1530657	0	2	1	1	1	1	1	75% of 0	1	1	1	1	1	1	1	1	1	1	1	1	1	1	1	1	1	1	1	1	1	1	1	1	1	1	75% of 2	1	1	1	1	1	1	75% of 0	1	1
AX-147218867	Araip.B04	1612239	0	2	1	1	1	1	1	1	1	1	1	1	1	1	1	1	1	1	1	1	1	1	1	1	1	1	1	1	1	1	1	1	1	1	75% of 2	1	1	1	1	1	1	75% of 0	1	1
AX-147246521	Araip.B04	1678730	2	0	1	1	1	1	1	75% of 2	1	1	1	1	1	1	1	1	1	1	1	1	1	1	1	1	1	1	1	1	1	1	1	1	1	1	75% of 0	1	1	1	1	1	1	75% of 2	1	1
AX-147218872	Araip.B04	1680468	2	0	1	1	1	1	1	75% of 2	1	1	1	1	1	1	1	1	1	1	1	1	1	1	1	1	1	1	1	1	1	1	1	1	1	1	75% of 0	1	1	75% of 2	1	1	1	75% of 2	1	1
AX-147218879	Araip.B04	1721526	2	0	1	1	1	1	1	75% of 2	1	1	1	1	1	1	1	1	1	1	1	1	1	1	1	1	1	1	1	1	1	1	1	1	1	1	75% of 0	1	1	75% of 2	1	1	1	75% of 2	1	1
AX-147246561	Araip.B04	1890633	2	0	1	1	1	1	1	75% of 2	1	1	1	1	1	1	1	1	1	1	1	1	1	1	1	1	1	1	1	1	1	1	1	1	1	1	75% of 0	1	1	1	1	1	1	75% of 2	1	1
AX-147218910	Araip.B04	1921430	2	0	1	1	1	1	1	75% of 2	1	1	1	1	1	1	1	1	1	1	1	1	1	1	1	1	1	1	1	1	1	1	1	1	1	1	75% of 0	1	1	75% of 2	1	1	1	75% of 2	1	1
AX-147246569	Araip.B04	2023749	2	0	1	1	1	1	1	75% of 2	1	1	1	1	1	1	1	1	1	1	1	1	1	1	1	1	1	1	1	1	1	1	1	1	1	1	75% of 0	1	1	75% of 2	1	1	1	75% of 2	1	1
AX-147246576	Araip.B04	2133752	2	0	1	1	1	1	1	75% of 2	1	1	1	1	1	1	1	1	1	1	1	1	1	1	1	1	1	1	1	1	1	1	1	1	1	1	75% of 0	1	1	75% of 2	1	1	1	75% of 2	1	1
AX-147246589	Araip.B04	2234594	0	2	1	1	1	1	1	75% of 0	1	1	1	1	1	1	1	1	1	1	1	1	1	1	1	1	1	1	1	1	1	1	1	1	1	1	75% of 2	1	1	75% of 0	1	1	1	75% of 0	1	1
AX-147246610	Araip.B04	2446164	0	2	1	1	1	1	1	75% of 0	1	1	1	1	1	1	1	1	1	1	1	1	1	1	1	1	1	1	1	1	1	1	1	1	1	1	75% of 2	1	1	75% of 0	1	1	1	75% of 0	1	1
AX-147246621	Araip.B04	2582799	0	2	1	1	1	1	1	75% of 0	1	1	1	1	1	1	1	1	1	1	1	1	1	1	1	1	1	1	1	1	1	1	1	1	1	1	75% of 2	1	1	75% of 0	1	1	1	75% of 0	1	1
AX-147218976	Araip.B04	2743764	0	2	1	1	1	1	1	75% of 0	1	1	1	1	1	1	1	1	1	1	1	1	1	1	1	1	1	1	1	1	1	1	1	1	1	1	75% of 2	1	1	1	1	1	1	75% of 0	1	1
AX-147218981	Araip.B04	3355815	0	2	1	1	1	1	1	75% of 0	1	1	1	1	1	1	1	75% of 0	1	1	1	1	1	1	1	1	1	1	1	1	1	1	1	1	1	1	75% of 2	1	1	75% of 0	1	1	1	75% of 0	1	1
AX-147218990	Araip.B04	3490627	2	0	1	1	1	1	1	75% of 2	1	1	1	1	1	1	1	1	1	1	1	1	1	1	1	1	1	1	1	1	1	1	1	75% of 0	1	1	75% of 0	1	1	75% of 2	1	1	1	75% of 2	1	1
AX-147219016	Araip.B04	3839844	0	2	1	1	1	1	1	0	1	1	1	1	1	1	1	1	1	1	1	1	1	1	1	1	1	1	1	1	1	1	1	1	1	1	75% of 0	1	1	0	1	1	1	75% of 2	1	1
AX-147246725	Araip.B04	4199539	0	2	1	1	1	1	1	75% of 0	1	1	1	1	1	1	1	1	1	1	1	1	1	1	1	1	1	1	1	1	1	1	1	75% of 2	1	1	75% of 2	1	1	75% of 0	1	1	1	75% of 0	1	1
AX-147246729	Araip.B04	4215943	0	2	1	1	1	1	1	75% of 0	1	1	1	1	1	1	1	1	1	1	1	1	1	1	1	1	1	1	1	1	1	1	1	75% of 2	1	1	75% of 2	1	1	75% of 0	1	1	1	75% of 0	1	1
AX-147219070	Araip.B04	4237924	0	2	1	1	1	1	1	75% of 0	1	1	1	1	1	1	1	1	1	1	1	1	1	1	1	1	1	1	1	1	1	1	1	1	1	1	75% of 2	1	1	75% of 0	1	1	1	75% of 0	1	1
AX-147246737	Araip.B04	4266773	0	2	1	1	1	1	1	75% of 0	1	1	1	1	1	1	1	1	1	1	1	1	1	1	1	1	1	1	1	1	1	1	1	75% of 2	1	1	75% of 2	1	1	75% of 0	1	1	1	75% of 0	1	1
AX-147246740	Araip.B04	4276127	0	2	1	1	1	1	1	75% of 0	1	1	1	1	1	1	1	1	1	1	1	1	1	1	1	1	1	1	1	1	1	1	1	75% of 2	1	1	75% of 2	1	1	75% of 0	1	1	1	75% of 0	1	1
AX-147246752	Araip.B04	4420103	0	2	1	1	1	1	1	75% of 0	1	1	1	1	1	1	1	1	1	1	1	1	1	1	1	1	1	1	1	1	1	1	1	75% of 2	1	1	75% of 2	1	1	75% of 0	1	1	1	75% of 0	1	1
AX-176791642	Araip.B04	4516806	0	2	1	1	1	1	1	75% of 0	1	1	1	1	1	1	1	1	1	1	1	1	1	1	1	1	1	1	1	1	1	1	1	1	1	1	75% of 2	1	1	75% of 0	1	1	1	75% of 0	1	1
AX-147246781	Araip.B04	4614688	2	0	1	1	1	1	1	75% of 2	1	1	1	1	1	1	1	1	1	1	1	1	1	1	1	1	1	1	1	1	1	1	1	75% of 0	1	1	75% of 0	1	1	75% of 2	1	1	1	75% of 2	1	1
AX-147246795	Araip.B04	4817699	2	0	1	1	1	1	1	75% of 2	1	1	1	1	1	1	1	1	1	1	1	1	1	1	1	1	1	1	1	1	1	1	1	75% of 0	1	1	75% of 0	1	1	75% of 2	1	1	1	75% of 2	1	1
AX-147219133	Araip.B04	4928919	2	0	1	1	1	1	1	75% of 2	1	1	1	1	1	1	1	1	1	1	1	1	1	1	1	1	1	1	1	1	1	1	1	1	1	1	75% of 0	1	1	75% of 2	1	1	1	75% of 2	1	1
AX-147246815	Araip.B04	5054471	2	0	1	1	1	1	1	75% of 2	1	1	1	1	1	1	1	1	1	1	1	1	1	1	1	1	1	1	1	1	1	1	1	75% of 0	1	1	75% of 0	1	1	75% of 2	1	1	1	75% of 2	1	1
AX-147246871	Araip.B04	5595266	2	0	1	1	1	1	1	75% of 2	1	1	1	1	1	1	1	1	1	1	1	1	1	1	1	1	1	1	1	1	1	1	1	75% of 0	1	1	75% of 0	1	1	75% of 2	1	1	1	75% of 2	1	1
AX-147246873	Araip.B04	5604508	2	0	1	1	1	1	1	75% of 2	1	1	1	1	1	1	1	1	1	1	1	1	1	1	1	1	1	1	1	1	1	1	1	75% of 0	1	1	75% of 0	1	1	75% of 2	1	1	1	75% of 2	1	1
AX-147246877	Araip.B04	5627446	0	2	1	1	1	1	1	75% of 0	1	1	1	1	1	1	1	1	1	1	1	1	1	1	1	1	1	1	1	1	1	1	1	75% of 2	1	1	75% of 2	1	1	75% of 0	1	1	1	75% of 0	1	1
AX-147246890	Araip.B04	5862449	0	2	1	1	1	1	1	75% of 0	1	1	1	1	1	1	1	1	1	1	1	1	1	1	1	1	1	1	1	1	1	1	1	75% of 2	1	1	75% of 2	1	1	75% of 0	1	1	1	75% of 0	1	1
AX-147246892	Araip.B04	5901258	0	2	1	1	1	1	1	75% of 0	1	1	1	1	1	1	1	1	1	1	1	1	1	1	1	1	1	1	1	1	1	1	1	75% of 2	1	1	75% of 2	1	1	75% of 0	1	1	1	75% of 0	1	1
AX-147219194	Araip.B04	5946980	2	0	1	1	1	1	1	75% of 2	1	1	1	1	1	1	1	1	1	1	1	1	1	1	1	1	1	1	1	1	1	1	1	1	1	1	75% of 0	1	1	75% of 2	1	1	1	75% of 2	1	1
AX-147219197	Araip.B04	6097596	2	0	1	1	1	1	1	75% of 2	1	1	1	1	1	1	1	1	1	1	1	1	1	1	1	1	1	1	1	1	1	1	1	1	1	1	75% of 0	1	1	75% of 2	1	1	1	75% of 2	1	1
AX-147246904	Araip.B04	6128842	0	2	1	1	1	1	1	75% of 0	1	1	1	1	1	1	1	1	1	1	1	1	1	1	1	1	1	1	1	1	1	1	1	75% of 2	1	1	1	1	1	75% of 0	1	1	1	75% of 0	1	1
AX-147246922	Araip.B04	6682105	0	2	1	1	1	1	1	75% of 0	1	1	1	1	1	1	1	1	1	1	1	1	1	1	1	1	1	1	1	1	1	1	1	1	1	1	1	1	1	75% of 0	1	1	1	75% of 0	1	1
AX-147246945	Araip.B04	7505480	0	2	1	1	1	1	1	1	1	1	1	1	1	1	1	1	1	1	1	1	1	1	1	1	1	1	1	1	1	1	1	1	1	1	1	1	1	1	1	1	1	75% of 0	1	1
AX-147246972	Araip.B04	8306108	2	0	1	1	1	1	1	75% of 2	1	1	1	1	1	1	1	1	1	1	1	1	1	1	1	1	1	1	1	1	1	1	1	1	1	1	1	1	1	1	1	1	1	75% of 2	1	1
AX-147247005	Araip.B04	8691137	0	2	1	1	1	1	1	75% of 0	1	1	1	1	1	1	1	1	1	1	1	1	1	1	1	1	1	1	1	1	1	1	1	1	1	1	1	1	1	1	1	1	1	75% of 0	1	1
AX-147247011	Araip.B04	8741509	0	2	1	1	1	1	1	75% of 0	1	1	1	1	1	1	1	1	1	1	1	1	1	1	1	1	1	1	1	1	1	1	1	1	1	1	1	1	1	1	1	1	1	75% of 0	1	1
AX-147219331	Araip.B04	9052871	0	2	1	1	1	1	1	75% of 0	1	1	1	1	1	1	1	0	1	1	1	1	1	1	1	1	1	1	1	1	1	1	1	1	1	1	1	1	1	75% of 0	1	1	1	75% of 0	1	1
AX-147219336	Araip.B04	9340895	2	0	1	1	1	1	1	75% of 2	1	1	1	1	1	1	1	1	1	1	1	1	1	1	1	1	1	1	1	1	1	1	1	1	1	1	1	1	1	75% of 2	1	1	1	75% of 2	1	1
AX-147247045	Araip.B04	9716663	0	2	1	1	1	1	1	75% of 0	1	1	1	1	1	1	1	1	1	1	1	1	1	1	1	1	1	1	1	1	1	1	1	1	1	1	1	1	1	1	1	1	1	75% of 0	1	1
AX-147219407	Araip.B04	10795668	0	2	1	1	1	1	1	75% of 0	1	1	1	1	1	1	1	1	1	1	1	1	1	1	1	1	1	1	1	1	1	1	1	1	1	1	1	1	1	75% of 0	1	1	1	75% of 0	1	1
AX-147219440	Araip.B04	11266025	0	1	1	1	1	1	1	75% of 0	1	1	1	1	1	1	1	1	1	1	1	1	1	1	1	1	1	1	1	1	1	1	1	1	1	1	1	1	1	75% of 0	1	1	1	75% of 0	1	1
AX-147219475	Araip.B04	13042798	2	0	1	1	1	1	1	75% of 2	1	1	1	1	1	1	1	1	1	1	1	1	1	1	1	1	1	1	1	1	1	1	1	1	1	1	1	1	1	75% of 2	1	1	1	75% of 2	1	1
AX-147219499	Araip.B04	13624024	2	0	1	1	1	1	1	75% of 2	1	1	1	1	1	1	1	1	1	1	1	1	1	1	1	1	1	1	1	1	1	1	1	1	1	1	1	1	1	75% of 2	1	1	1	75% of 2	1	1
AX-147247176	Araip.B04	13892409	2	0	1	1	1	1	1	75% of 2	1	1	1	1	1	1	1	1	1	1	1	1	1	1	1	1	1	1	1	1	1	1	1	1	1	1	1	1	1	75% of 2	1	1	1	75% of 2	1	1
AX-147219586	Araip.B04	16036352	2	0	1	1	1	1	1	75% of 2	1	1	1	1	1	1	1	1	1	1	1	1	1	1	1	1	1	1	1	1	1	1	1	1	1	1	1	1	1	75% of 2	1	1	1	75% of 2	1	1
AX-147247261	Araip.B04	16301350	0	2	1	1	1	1	1	75% of 0	1	1	1	1	1	1	1	1	1	1	1	1	1	1	1	1	1	1	1	1	1	1	1	1	1	1	1	1	1	1	1	1	1	75% of 0	1	1
AX-176818340	Araip.B04	16791455	2	0	2	2	1	1	1	2	1	1	1	1	1	1	1	1	1	1	1	1	1	1	1	1	1	1	1	1	1	1	1	1	1	1	1	1	1	2	1	1	1	2	1	1
AX-147247264	Araip.B04	16989730	2	0	1	1	1	1	1	75% of 2	1	1	1	1	1	1	1	1	1	1	1	1	1	1	1	1	1	1	1	1	1	1	1	1	1	1	1	1	1	75% of 2	1	1	1	75% of 2	1	1
AX-147219620	Araip.B04	17382311	0	2	1	1	1	1	1	0	1	1	1	1	1	1	1	1	1	1	1	1	1	1	1	1	1	1	1	1	1	1	1	1	1	1	1	1	1	1	1	1	1	1	1	1
AX-147247289	Araip.B04	17552523	0	2	1	1	1	1	1	75% of 0	1	1	1	1	1	1	1	1	1	1	1	1	1	1	1	1	1	1	1	1	1	1	1	1	1	1	1	1	1	75% of 0	1	1	1	75% of 0	1	1
AX-147219671	Araip.B04	19999033	2	0	1	1	1	1	1	75% of 2	1	1	1	1	1	1	1	1	1	1	1	1	1	1	1	1	1	1	1	1	1	1	1	1	1	1	1	1	1	75% of 2	1	1	1	75% of 2	1	1
AX-147219673	Araip.B04	20020197	2	0	1	1	1	1	1	75% of 2	1	1	1	1	1	1	1	1	1	1	1	1	1	1	1	1	1	1	1	1	1	1	1	1	1	1	1	1	1	75% of 2	1	1	1	75% of 2	1	1
AX-147219677	Araip.B04	20451978	0	2	1	1	1	1	1	75% of 0	1	1	1	1	1	1	1	1	1	1	1	1	1	1	1	1	1	1	1	1	1	1	1	1	1	1	1	1	1	75% of 0	1	1	1	75% of 0	1	1
AX-147219681	Araip.B04	20539321	2	0	1	1	1	1	1	75% of 2	1	1	1	1	1	1	1	1	1	1	1	1	1	1	1	1	1	1	1	1	1	1	1	1	1	1	1	1	1	75% of 2	1	1	1	75% of 2	1	1
AX-147219682	Araip.B04	20539390	0	1	1	1	1	1	1	75% of 0	1	1	1	1	1	1	1	1	1	1	1	1	1	1	1	1	1	1	1	1	1	1	1	1	1	1	1	1	1	75% of 0	1	1	1	75% of 0	1	1
AX-147221175	Araip.B04	129498302	2	0	2	2	75% of 0	1	1	1	1	1	1	75% of 0	75% of 0	75% of 0	75% of 0	75% of 0	75% of 0	75% of 2	1	1	1	1	1	1	75% of 2	1	1	1	1	1	1	1	1	1	1	1	1	1	1	1	1	75% of 2	1	1
AX-147247365	Araip.B04	20657527	2	0	1	1	1	1	1	75% of 2	1	1	1	1	1	1	1	1	1	1	1	1	1	1	1	1	1	1	1	1	1	1	1	1	1	1	1	1	1	75% of 2	1	1	1	75% of 2	1	1
AX-147247368	Araip.B04	20882150	2	0	1	1	1	1	1	75% of 2	1	1	1	1	1	1	1	1	1	1	1	1	1	1	1	1	1	1	1	1	1	1	1	1	1	1	1	1	1	75% of 2	1	1	1	75% of 2	1	1
AX-147219721	Araip.B04	21204195	0	1	1	1	1	1	1	75% of 0	1	1	1	1	1	1	1	0	1	1	1	1	1	1	1	1	1	1	1	1	1	1	1	1	1	1	1	1	1	75% of 0	1	1	1	75% of 0	1	1
AX-147219748	Araip.B04	23049636	0	2	1	1	1	1	1	75% of 0	1	1	1	1	1	1	1	1	1	1	1	1	1	1	1	1	1	1	1	1	1	1	1	1	1	1	1	1	1	75% of 0	1	1	1	75% of 0	1	1
AX-147219808	Araip.B04	27539129	0	2	1	1	1	1	1	1	1	1	1	1	1	1	1	1	1	1	1	1	1	1	1	1	1	1	1	1	1	1	1	1	1	1	1	1	1	75% of 0	1	1	1	75% of 0	1	1
AX-147219826	Araip.B04	29563967	2	0	1	1	1	1	1	1	1	1	1	1	1	1	1	1	1	1	1	1	1	1	1	1	1	1	1	1	1	1	1	1	1	1	1	1	1	75% of 2	1	1	1	75% of 2	1	1
AX-147247493	Araip.B04	29672339	2	0	1	1	1	1	1	1	1	1	1	1	1	1	1	1	1	1	1	1	1	1	1	1	1	1	1	1	1	1	1	1	1	1	1	1	1	75% of 2	1	1	1	75% of 2	1	1
AX-147220544	Araip.B04	31166203	0	2	1	1	1	1	1	1	1	1	1	1	1	1	1	1	1	1	1	1	1	1	1	1	1	1	1	1	1	1	1	1	1	1	1	1	1	1	1	1	1	75% of 0	1	1
AX-147219866	Araip.B04	33088115	0	2	1	1	1	1	1	1	1	1	1	1	1	1	1	1	1	1	1	1	1	1	1	1	1	1	1	1	1	1	1	1	1	1	1	1	1	1	1	1	1	75% of 0	1	1
AX-147219889	Araip.B04	34380876	0	2	1	1	1	1	1	1	1	1	1	1	1	1	1	1	1	1	1	1	1	1	1	1	1	1	1	1	1	1	1	1	1	1	1	1	1	75% of 0	1	1	1	75% of 0	1	1
AX-147219906	Araip.B04	37601992	2	0	1	1	1	1	1	1	1	1	1	1	1	1	1	1	1	1	1	1	1	1	1	1	1	1	1	1	1	1	1	1	1	1	1	1	1	75% of 2	1	1	1	75% of 2	1	1
AX-147219934	Araip.B04	39865816	2	0	1	1	1	1	1	1	1	1	1	1	1	1	1	1	1	1	1	1	1	1	1	1	1	1	1	1	1	1	1	1	1	1	1	1	1	75% of 2	1	1	1	75% of 2	1	1
AX-147247576	Araip.B04	40056846	2	0	1	1	1	1	1	1	1	1	1	1	1	1	1	1	1	1	1	1	1	1	1	1	1	1	1	1	1	1	1	1	1	1	1	1	1	75% of 2	1	1	1	75% of 2	1	1
AX-147247577	Araip.B04	40059392	2	0	1	1	1	1	1	1	1	1	1	1	1	1	1	1	1	1	1	1	1	1	1	1	1	1	1	1	1	1	1	1	1	1	1	1	1	1	1	1	1	75% of 2	1	1
AX-147219935	Araip.B04	40061129	2	0	1	1	1	1	1	1	1	1	1	1	1	1	1	1	1	1	1	1	1	1	1	1	1	1	1	1	1	1	1	1	1	1	1	1	1	1	1	1	1	75% of 2	1	1
AX-147247611	Araip.B04	46100243	0	2	1	0	1	1	1	1	1	1	1	1	1	1	1	1	1	1	1	1	1	1	1	1	1	1	1	1	1	1	1	1	1	1	1	1	1	75% of 0	1	1	1	75% of 0	1	1
AX-147247627	Araip.B04	56743591	0	2	1	1	1	1	1	1	1	1	1	1	1	1	1	1	1	1	1	1	1	1	1	1	1	1	1	1	1	1	1	1	1	1	1	1	1	1	1	1	1	75% of 0	1	1
AX-147220034	Araip.B04	73933960	0	2	1	1	1	1	1	1	1	1	1	1	1	1	1	1	1	1	1	1	1	1	1	1	1	1	1	1	1	1	1	1	1	1	1	1	1	1	1	1	1	75% of 0	1	1
AX-147220132	Araip.B04	78948786	0	2	1	1	1	1	1	1	1	1	1	1	1	1	1	1	1	1	1	1	1	1	1	1	1	1	1	1	1	1	1	1	1	1	1	1	1	1	1	1	1	75% of 0	1	1
AX-147220151	Araip.B04	82330014	2	0	1	1	1	1	1	1	1	1	1	1	1	1	1	1	1	1	1	1	1	1	1	1	1	1	1	1	1	1	1	1	1	1	1	1	1	1	1	1	1	75% of 2	1	1
AX-147220163	Araip.B04	82844303	0	2	1	1	1	1	1	1	1	1	1	1	1	1	1	1	1	1	1	1	1	1	1	1	1	1	1	1	1	1	1	1	1	1	1	1	1	1	1	1	1	75% of 0	1	1
AX-147220178	Araip.B04	83529312	0	2	1	1	1	1	1	1	1	1	1	1	1	1	1	1	1	1	1	1	1	1	1	1	1	1	1	1	1	1	1	1	1	1	1	1	1	1	1	1	1	75% of 0	1	1
AX-176792134	Araip.B04	83531056	0	2	1	1	1	1	1	1	1	1	1	1	1	1	1	1	1	1	1	1	1	1	1	1	1	1	1	1	1	1	1	1	1	1	1	1	1	1	1	1	1	0	1	1
AX-147220191	Araip.B04	84727988	2	0	1	1	1	1	1	1	1	1	1	1	1	1	1	1	1	1	1	1	1	1	1	1	1	1	1	1	1	1	1	1	1	1	1	1	1	1	1	1	1	75% of 2	1	1
AX-147247744	Araip.B04	85231477	0	2	1	1	1	1	1	1	1	1	1	1	1	1	1	1	1	1	1	1	1	1	1	1	1	1	1	1	1	1	1	1	1	1	1	1	1	1	1	1	1	75% of 0	1	1
AX-147247745	Araip.B04	85232987	0	2	1	1	1	1	1	1	1	1	1	1	1	1	1	1	1	1	1	1	1	1	1	NoCall	1	1	1	1	1	1	1	1	1	1	1	1	1	1	1	1	1	75% of 0	1	1
AX-147220204	Araip.B04	87548549	0	2	1	1	1	1	NoCall	1	1	1	1	1	1	1	1	1	1	1	1	1	1	1	1	1	1	1	1	1	1	1	1	1	1	1	1	1	1	1	1	1	1	75% of 0	1	1
AX-147247752	Araip.B04	88398643	0	2	1	1	1	1	1	1	1	1	1	1	1	1	1	1	1	1	1	1	1	1	1	1	1	1	1	1	1	1	1	1	1	1	1	1	1	1	1	1	1	75% of 0	1	1
AX-147220214	Araip.B04	88923408	0	2	1	1	1	1	1	1	1	1	1	1	1	1	1	1	1	1	1	1	1	1	1	1	1	1	1	1	1	1	1	1	1	1	1	1	1	1	1	1	1	75% of 0	1	1
AX-147220229	Araip.B04	89464090	0	2	1	1	1	1	1	1	1	1	1	1	1	1	1	1	1	1	1	1	1	1	1	1	1	1	1	1	1	1	1	1	1	1	1	1	1	1	1	1	1	75% of 0	1	1
AX-147219881	Araip.B04	91386649	2	0	1	1	1	1	1	1	1	1	1	1	1	1	1	1	1	1	1	1	1	1	1	1	1	1	1	1	1	1	1	1	1	1	1	1	1	75% of 2	1	1	1	75% of 2	1	1
AX-147247820	Araip.B04	97638021	0	2	1	1	1	1	1	1	1	1	1	1	1	1	1	1	1	1	1	1	1	1	1	1	1	1	1	1	1	1	1	1	1	1	1	1	1	1	1	1	1	75% of 0	1	1
AX-176802483	Araip.B04	101225469	0	2	1	1	1	1	1	1	1	1	1	1	1	1	1	1	75% of 0	1	75% of 0	1	1	1	1	1	1	1	1	1	1	1	1	1	1	1	1	1	1	1	1	1	1	1	1	1
AX-147220376	Araip.B04	105224345	0	1	1	1	1	1	1	1	1	1	1	1	1	1	1	1	1	1	1	1	1	1	1	1	1	1	1	1	1	1	1	1	1	1	1	1	1	1	1	1	1	75% of 0	1	1
AX-147220430	Araip.B04	110110859	0	2	1	1	1	1	1	1	1	1	1	1	1	1	1	NoCall	1	1	1	1	1	1	1	1	1	1	1	1	1	1	1	1	1	1	1	1	1	1	1	1	1	75% of 0	1	1
AX-147220460	Araip.B04	111763487	0	2	1	1	1	1	1	1	1	1	1	1	1	1	1	1	1	1	1	1	1	1	1	1	1	1	1	1	1	1	1	1	1	1	1	1	1	1	1	1	1	75% of 0	1	1
AX-147248027	Araip.B04	111838379	2	0	1	1	1	1	1	1	1	1	1	1	1	1	1	1	1	1	1	1	1	1	1	1	1	1	1	1	1	1	1	1	1	1	1	1	1	1	1	1	1	75% of 2	1	1
AX-147220464	Araip.B04	111980482	2	0	1	1	1	1	1	1	1	1	1	1	1	1	1	1	1	1	1	1	1	1	1	1	1	1	1	1	1	1	1	1	1	1	1	1	1	1	1	1	1	75% of 2	1	1
AX-147248074	Araip.B04	113767135	2	0	1	1	1	1	1	1	1	1	1	1	1	1	1	1	1	1	1	1	1	1	1	1	1	1	1	1	1	1	1	1	1	1	1	1	1	1	1	1	1	75% of 2	1	1
AX-147248084	Araip.B04	113979833	2	0	1	1	1	1	1	1	1	1	1	1	1	1	1	1	1	1	1	1	1	1	1	1	1	1	1	1	1	1	1	1	1	1	1	1	1	1	1	1	1	75% of 2	1	1
AX-147220529	Araip.B04	113984760	2	0	1	1	1	1	1	1	1	1	1	1	1	1	1	1	1	1	1	1	1	1	1	1	1	1	1	1	1	1	1	1	1	1	1	1	1	1	1	1	1	75% of 2	1	1
AX-147220591	Araip.B04	115665916	2	0	1	1	1	1	1	1	1	1	1	1	1	1	1	1	1	1	1	1	1	1	1	1	1	1	1	1	1	1	1	1	1	1	1	1	1	1	1	1	1	75% of 2	1	1
AX-147248167	Araip.B04	115856265	2	0	1	1	1	1	1	1	1	1	1	1	1	1	1	1	1	1	1	1	1	1	1	1	1	1	1	1	1	1	1	1	1	1	1	1	1	1	1	1	1	75% of 2	1	1
AX-147248311	Araip.B04	121025983	2	0	1	1	1	1	1	1	1	1	1	1	1	1	1	1	1	1	1	1	1	1	1	NoCall	1	1	1	1	1	1	1	1	1	1	1	1	1	1	1	1	1	75% of 2	1	1
AX-147248328	Araip.B04	121585266	2	0	1	1	1	1	1	1	1	1	1	1	1	1	1	1	1	1	1	1	1	1	1	1	1	1	1	1	1	1	1	1	1	1	1	1	1	1	1	1	1	75% of 2	1	1
AX-147248329	Araip.B04	121585570	2	0	1	1	1	1	1	1	1	1	1	1	1	1	1	1	1	1	1	1	1	1	1	1	1	1	1	1	1	1	1	1	1	1	1	1	1	1	1	1	1	75% of 2	1	1
AX-147220849	Araip.B04	123807791	2	0	1	1	1	1	1	1	1	1	75% of 2	1	1	1	1	1	1	75% of 2	1	1	1	1	1	1	1	1	1	1	1	1	1	1	1	1	1	1	1	1	1	1	1	75% of 2	1	1
AX-147248402	Araip.B04	124023584	2	0	1	1	1	1	1	1	1	1	75% of 2	1	1	1	1	1	1	75% of 2	1	1	1	1	1	1	1	1	1	1	1	1	1	1	1	1	1	1	1	1	1	1	1	75% of 2	1	1
AX-147248422	Araip.B04	124269424	0	2	1	1	1	1	1	1	1	1	75% of 0	1	1	1	1	1	1	75% of 0	1	1	1	1	1	1	1	1	1	1	1	1	1	1	1	1	1	1	1	1	1	1	1	75% of 0	1	1
AX-147248424	Araip.B04	124298527	0	2	1	1	1	1	1	1	1	1	75% of 0	1	1	1	1	1	1	75% of 0	1	1	1	1	1	1	1	1	1	1	1	1	1	1	1	1	1	1	1	1	1	1	1	75% of 0	1	1
AX-147248448	Araip.B04	124804923	0	2	1	1	75% of 2	1	1	1	1	1	1	75% of 2	75% of 2	75% of 2	75% of 2	75% of 2	75% of 2	75% of 0	1	1	1	1	1	1	1	1	1	1	1	1	1	1	1	1	1	1	1	1	1	1	1	75% of 0	1	1
AX-147220907	Araip.B04	124824690	2	0	1	NoCall	75% of 0	1	1	1	1	1	1	75% of 0	75% of 0	75% of 0	75% of 0	75% of 0	75% of 0	75% of 2	1	1	1	1	1	1	1	1	1	1	1	1	1	1	1	1	1	1	1	1	1	1	1	75% of 2	1	1
AX-147248475	Araip.B04	125438618	0	2	1	1	75% of 2	1	1	1	1	1	1	75% of 2	75% of 2	75% of 2	75% of 2	75% of 2	75% of 2	75% of 0	1	1	1	1	1	1	1	1	1	1	1	1	1	1	1	1	1	1	1	1	1	1	1	75% of 0	1	1
AX-147248476	Araip.B04	125440304	0	2	1	1	75% of 2	1	1	1	1	1	1	75% of 2	75% of 2	75% of 2	75% of 2	75% of 2	75% of 2	75% of 0	1	1	1	1	1	1	1	1	1	1	1	1	1	1	1	1	1	1	1	1	1	1	1	75% of 0	1	1
AX-147221088	Araip.B04	128460377	2	0	1	1	75% of 0	1	1	1	1	1	1	75% of 0	75% of 0	75% of 0	75% of 0	75% of 0	75% of 0	75% of 2	1	1	1	1	1	1	1	1	1	1	1	1	1	1	1	1	1	1	1	1	1	1	1	75% of 2	1	1
AX-147248617	Araip.B04	128469894	2	0	1	1	75% of 0	1	1	1	1	1	1	75% of 0	75% of 0	75% of 0	75% of 0	75% of 0	75% of 0	75% of 2	1	1	1	1	1	1	1	1	1	1	1	1	1	1	1	1	1	1	1	1	1	1	1	75% of 2	1	1
AX-147248627	Araip.B04	128518680	0	2	1	1	75% of 2	1	1	1	1	1	1	75% of 2	75% of 2	75% of 2	75% of 2	75% of 2	75% of 2	75% of 0	1	1	1	1	1	1	1	1	1	1	1	1	1	1	1	1	1	1	1	1	1	1	1	75% of 0	1	1
AX-147221124	Araip.B04	129198098	0	2	1	1	75% of 2	1	1	1	1	1	1	75% of 2	75% of 2	75% of 2	75% of 2	75% of 2	75% of 2	75% of 0	1	1	1	1	1	1	1	1	1	1	1	1	1	1	1	1	1	1	1	1	1	1	1	75% of 0	1	1
AX-147221160	Araip.B04	129385417	2	0	1	1	75% of 0	1	1	1	1	1	1	75% of 0	75% of 0	75% of 0	75% of 0	75% of 0	75% of 0	75% of 2	1	1	1	1	1	1	75% of 2	1	1	1	1	1	1	1	1	1	1	1	1	1	1	1	1	75% of 2	1	1
AX-147221161	Araip.B04	129385840	2	0	1	1	75% of 0	1	1	1	1	1	1	75% of 0	75% of 0	75% of 0	75% of 0	75% of 0	75% of 0	75% of 2	1	1	1	1	1	1	75% of 2	1	1	1	1	1	1	1	1	1	1	1	1	1	1	1	1	75% of 2	1	1
AX-147248696	Araip.B04	129600869	0	2	1	1	75% of 2	1	1	1	1	1	1	75% of 2	75% of 2	75% of 2	75% of 2	75% of 2	75% of 2	75% of 0	1	1	1	1	1	1	75% of 0	1	1	1	1	1	1	1	1	1	1	1	1	1	1	1	1	75% of 0	1	1
AX-147221210	Araip.B04	129796029	2	0	1	1	75% of 0	1	1	1	1	1	1	75% of 0	75% of 0	75% of 0	75% of 0	75% of 0	75% of 0	75% of 2	1	1	1	1	1	1	75% of 2	1	1	1	1	1	1	1	1	1	1	1	1	1	1	1	1	75% of 2	1	1
AX-147248730	Araip.B04	129989016	0	2	1	1	75% of 2	1	1	1	1	1	1	75% of 2	75% of 2	75% of 2	75% of 2	75% of 2	75% of 2	75% of 0	1	1	1	1	1	1	75% of 0	1	1	1	1	1	1	1	1	1	1	1	1	1	1	1	1	75% of 0	1	1
AX-147248735	Araip.B04	130112475	0	2	1	1	75% of 2	1	1	1	1	1	1	75% of 2	75% of 2	75% of 2	75% of 2	75% of 2	75% of 2	75% of 0	1	1	1	1	1	1	75% of 0	1	1	1	1	1	1	1	1	1	1	1	1	1	1	1	1	75% of 0	1	1
AX-147248739	Araip.B04	130210807	2	0	1	1	75% of 0	1	1	1	1	1	1	75% of 0	75% of 0	75% of 0	75% of 0	75% of 0	75% of 0	2	1	1	1	1	1	1	2	1	1	1	1	1	1	1	1	1	1	1	1	1	1	1	1	2	1	1
AX-176791380	Araip.B04	131369085	2	0	0	0	75% of 0	1	1	75% of 0	75% of 0	75% of 0	75% of 0	0	0	0	0	0	0	1	75% of 0	75% of 0	75% of 0	75% of 0	75% of 0	75% of 0	1	75% of 0	75% of 0	75% of 0	75% of 0	75% of 0	75% of 0	75% of 0	75% of 0	75% of 0	75% of 0	75% of 0	75% of 0	75% of 0	75% of 0	75% of 0	75% of 0	75% of 0	75% of 0	75% of 0
AX-147221357	Araip.B04	131423712	0	2	2	2	75% of 2	1	1	75% of 2	75% of 2	75% of 2	75% of 2	2	2	2	2	2	2	1	75% of 2	75% of 2	75% of 2	75% of 2	75% of 2	75% of 2	1	75% of 2	75% of 2	75% of 2	75% of 2	75% of 2	75% of 2	75% of 2	75% of 2	75% of 2	75% of 2	75% of 2	75% of 2	75% of 2	75% of 2	75% of 2	75% of 2	75% of 2	75% of 2	75% of 2
AX-147221364	Araip.B04	131478950	2	0	0	0	75% of 0	1	1	75% of 0	75% of 0	75% of 0	75% of 0	0	0	0	0	0	0	1	75% of 0	75% of 0	75% of 0	75% of 0	75% of 0	75% of 0	1	75% of 0	75% of 0	75% of 0	75% of 0	75% of 0	75% of 0	75% of 0	75% of 0	75% of 0	75% of 0	75% of 0	75% of 0	75% of 0	75% of 0	75% of 0	75% of 0	75% of 0	75% of 0	75% of 0
AX-147221371	Araip.B04	131503844	2	0	0	0	75% of 0	1	1	75% of 0	75% of 0	75% of 0	75% of 0	0	0	0	0	0	0	1	75% of 0	75% of 0	75% of 0	75% of 0	75% of 0	75% of 0	1	75% of 0	75% of 0	75% of 0	75% of 0	75% of 0	75% of 0	75% of 0	75% of 0	75% of 0	75% of 0	75% of 0	75% of 0	75% of 0	75% of 0	75% of 0	75% of 0	75% of 0	75% of 0	75% of 0
AX-147221467	Araip.B05	1426280	2	0	2	2	1	1	75% of 0	75% of 2	75% of 2	1	75% of 2	75% of 2	75% of 2	75% of 2	75% of 2	75% of 2	75% of 2	75% of 2	75% of 2	75% of 2	75% of 2	1	1	1	75% of 2	1	75% of 2	75% of 2	1	1	1	1	1	75% of 2	1	1	1	1	1	75% of 2	1	1	1	1
AX-147221593	Araip.B05	6425776	0	2	1	1	1	1	75% of 2	1	1	75% of 2	1	1	1	1	1	1	1	1	1	1	1	1	1	1	1	1	1	1	1	1	1	1	1	1	75% of 2	75% of 2	75% of 2	75% of 2	75% of 2	75% of 2	75% of 2	1	75% of 2	1
AX-147221630	Araip.B05	7141413	0	2	1	1	1	1	75% of 2	1	1	75% of 2	1	1	1	1	1	1	1	1	1	1	1	1	75% of 2	1	1	1	1	1	1	1	1	1	1	1	75% of 2	75% of 2	75% of 2	75% of 2	75% of 2	75% of 2	75% of 2	1	75% of 2	1
AX-147249076	Araip.B05	7161219	2	0	1	1	1	1	75% of 0	1	1	1	1	1	1	1	1	1	1	1	1	1	1	1	75% of 0	1	1	1	1	1	1	1	1	1	1	1	75% of 0	75% of 0	75% of 0	75% of 0	75% of 0	75% of 0	75% of 0	1	75% of 0	1
AX-147221644	Araip.B05	7373130	0	2	1	1	1	1	75% of 2	1	1	75% of 2	1	1	1	1	1	1	1	1	1	1	1	1	75% of 2	1	1	1	1	1	1	1	1	1	1	1	75% of 2	75% of 2	75% of 2	75% of 2	75% of 2	75% of 2	75% of 2	1	75% of 2	1
AX-147249099	Araip.B05	7687289	0	2	1	1	1	1	75% of 2	1	1	1	1	1	1	1	1	1	1	1	1	1	1	1	75% of 2	1	1	1	1	1	1	1	1	1	1	1	75% of 2	75% of 2	75% of 2	75% of 2	75% of 2	75% of 2	75% of 2	1	75% of 2	1
AX-147221661	Araip.B05	7849216	0	2	1	1	1	1	75% of 2	1	1	75% of 2	1	1	1	1	1	1	1	1	1	1	1	1	75% of 2	1	1	1	1	1	1	1	1	1	1	1	75% of 2	75% of 2	75% of 2	75% of 2	75% of 2	75% of 2	75% of 2	1	75% of 2	1
AX-147221690	Araip.B05	8413953	2	0	1	1	1	1	75% of 0	1	1	75% of 0	1	1	1	1	1	1	1	1	1	1	1	1	75% of 0	1	1	1	1	1	1	1	1	1	1	1	75% of 0	75% of 0	75% of 0	75% of 0	75% of 0	75% of 0	75% of 0	1	75% of 0	1
AX-147249129	Araip.B05	8588087	0	2	1	1	1	1	75% of 2	1	1	75% of 2	1	1	1	1	1	1	1	1	1	1	1	1	75% of 2	1	1	1	1	1	1	1	1	1	1	1	75% of 2	75% of 2	75% of 2	75% of 2	75% of 2	75% of 2	75% of 2	1	75% of 2	1
AX-147249140	Araip.B05	8975356	2	0	1	1	1	1	75% of 0	1	1	75% of 0	1	1	1	1	1	1	1	1	1	1	1	1	75% of 0	1	1	1	1	1	1	1	1	1	1	1	75% of 0	75% of 0	75% of 0	75% of 0	75% of 0	75% of 0	75% of 0	1	75% of 0	1
AX-147249144	Araip.B05	9073245	2	0	1	1	1	1	75% of 0	1	1	75% of 0	1	1	1	1	1	1	1	1	1	1	1	1	75% of 0	1	1	1	1	1	1	1	1	1	1	1	75% of 0	75% of 0	75% of 0	75% of 0	75% of 0	75% of 0	75% of 0	1	75% of 0	1
AX-147249149	Araip.B05	9285673	0	2	1	1	1	1	75% of 2	1	1	75% of 2	1	1	1	1	1	1	1	1	1	1	1	1	75% of 2	NoCall	1	1	1	1	1	1	1	1	1	1	75% of 2	75% of 2	75% of 2	75% of 2	75% of 2	75% of 2	75% of 2	1	75% of 2	1
AX-147221728	Araip.B05	9380956	0	2	0	0	1	1	75% of 2	1	1	75% of 2	1	1	1	1	1	1	1	1	1	1	1	1	1	1	1	1	1	1	1	1	1	1	1	1	75% of 2	75% of 2	75% of 2	75% of 2	75% of 2	75% of 2	75% of 2	1	75% of 2	1
AX-147221744	Araip.B05	10026302	0	2	1	1	1	1	75% of 2	1	1	75% of 2	1	1	1	1	1	1	1	1	1	1	1	1	75% of 2	1	1	1	1	1	1	1	1	1	1	1	75% of 2	75% of 2	75% of 2	75% of 2	75% of 2	75% of 2	75% of 2	1	1	1
AX-147249198	Araip.B05	10899564	0	2	1	1	1	1	75% of 2	1	1	75% of 2	1	1	1	1	1	1	1	1	1	1	1	1	75% of 2	1	1	1	1	1	1	1	1	1	1	1	75% of 2	75% of 2	75% of 2	75% of 2	75% of 2	75% of 2	75% of 2	1	1	1
AX-147221764	Araip.B05	10904683	2	0	1	1	1	1	75% of 0	1	1	75% of 0	1	1	1	1	1	1	1	1	1	1	1	1	75% of 0	1	1	1	1	1	1	1	1	1	1	1	75% of 0	75% of 0	75% of 0	75% of 0	75% of 0	75% of 0	75% of 0	1	1	1
AX-147249250	Araip.B05	12177012	2	0	1	1	1	1	75% of 0	1	1	75% of 0	1	1	1	1	1	1	1	1	1	1	1	1	75% of 0	1	1	1	1	1	1	1	1	1	1	1	75% of 0	75% of 0	75% of 0	75% of 0	75% of 0	75% of 0	75% of 0	1	1	1
AX-147221815	Araip.B05	12183118	0	2	1	1	1	1	75% of 2	1	1	75% of 2	1	1	1	1	1	1	1	1	1	1	1	1	75% of 2	1	1	1	1	1	1	1	1	1	1	1	75% of 2	75% of 2	75% of 2	75% of 2	75% of 2	75% of 2	75% of 2	1	1	1
AX-147221822	Araip.B05	12457858	0	2	1	1	1	1	75% of 2	1	1	75% of 2	1	1	1	NoCall	1	1	1	1	1	1	1	1	75% of 2	1	1	1	1	1	1	1	1	1	1	1	75% of 2	75% of 2	75% of 2	75% of 2	75% of 2	75% of 2	75% of 2	1	1	1
AX-147221834	Araip.B05	12731369	2	0	1	1	1	1	75% of 0	1	1	75% of 0	1	1	1	1	1	1	1	1	1	1	1	1	75% of 0	1	1	1	1	1	1	1	1	1	1	1	75% of 0	75% of 0	75% of 0	75% of 0	75% of 0	75% of 0	75% of 0	1	1	1
AX-147221851	Araip.B05	13135981	0	2	1	1	1	1	75% of 2	1	1	75% of 2	1	1	1	1	1	1	1	1	1	1	1	1	75% of 2	1	1	1	1	1	1	1	1	1	1	1	75% of 2	75% of 2	75% of 2	75% of 2	75% of 2	75% of 2	75% of 2	1	1	1
AX-147249346	Araip.B05	15195416	0	2	1	1	1	1	75% of 2	1	1	75% of 2	1	1	1	1	1	1	1	1	1	1	1	1	75% of 2	1	1	1	1	1	1	1	1	1	1	1	75% of 2	75% of 2	75% of 2	75% of 2	75% of 2	75% of 2	75% of 2	1	1	1
AX-147221947	Araip.B05	15568257	0	2	1	1	1	1	75% of 2	1	1	75% of 2	1	1	1	1	1	1	1	1	1	1	1	1	75% of 2	1	1	1	1	1	1	1	1	1	1	1	75% of 2	75% of 2	75% of 2	75% of 2	75% of 2	75% of 2	75% of 2	1	1	1
AX-147221971	Araip.B05	16088919	2	0	1	1	1	1	75% of 0	1	1	75% of 0	1	1	1	1	1	1	1	1	1	1	1	1	1	1	1	1	1	1	1	1	1	1	1	1	75% of 0	75% of 0	75% of 0	75% of 0	75% of 0	75% of 0	75% of 0	1	1	1
AX-147249415	Araip.B05	16779596	0	2	1	1	1	1	75% of 2	NoCall	1	75% of 2	1	1	1	1	1	1	1	1	1	1	1	1	75% of 2	1	1	1	1	1	1	1	1	1	1	1	75% of 2	75% of 2	75% of 2	75% of 2	75% of 2	75% of 2	75% of 2	1	1	1
AX-147249419	Araip.B05	16814071	2	0	1	1	1	1	75% of 0	1	1	75% of 0	1	1	1	1	1	1	1	1	1	1	1	1	75% of 0	1	1	1	1	1	1	1	1	1	1	1	75% of 0	75% of 0	75% of 0	75% of 0	75% of 0	75% of 0	75% of 0	1	1	1
AX-147222142	Araip.B05	20296006	0	2	0	0	1	1	75% of 2	75% of 0	75% of 0	75% of 0	75% of 0	75% of 0	75% of 0	75% of 0	75% of 0	75% of 0	75% of 0	75% of 0	75% of 0	75% of 0	75% of 0	75% of 0	1	75% of 0	75% of 0	75% of 0	75% of 0	75% of 0	75% of 0	75% of 0	75% of 0	75% of 0	75% of 0	75% of 0	1	1	1	1	1	1	1	75% of 0	75% of 0	75% of 0
AX-147249670	Araip.B05	24364583	0	2	1	1	1	1	75% of 2	1	1	1	1	1	1	1	1	1	1	1	1	1	1	1	75% of 2	1	1	1	1	1	1	1	1	1	1	1	75% of 2	75% of 2	75% of 2	75% of 2	75% of 2	75% of 2	75% of 2	1	1	1
AX-147222245	Araip.B05	24572683	0	2	1	1	1	1	75% of 2	1	1	1	1	1	1	1	1	1	1	1	1	1	1	1	1	1	1	1	1	1	1	1	1	1	1	1	75% of 2	75% of 2	75% of 2	75% of 2	75% of 2	75% of 2	75% of 2	1	1	1
AX-147249681	Araip.B05	25238686	2	0	1	1	1	1	75% of 0	1	1	1	1	1	1	1	1	1	1	1	1	1	1	1	1	1	1	1	1	1	1	1	1	1	1	1	75% of 0	75% of 0	75% of 0	75% of 0	75% of 0	75% of 0	75% of 0	1	1	1
AX-147249687	Araip.B05	25429352	0	2	1	1	1	1	75% of 2	1	1	1	1	1	1	1	1	1	1	1	1	1	1	1	1	1	1	1	1	1	1	1	1	1	1	1	75% of 2	75% of 2	75% of 2	75% of 2	75% of 2	75% of 2	75% of 2	1	1	1
AX-147249723	Araip.B05	26447012	0	2	1	1	1	1	75% of 2	1	1	1	1	1	1	1	1	1	1	1	1	1	1	1	1	1	1	1	1	1	1	1	1	1	1	1	75% of 2	75% of 2	75% of 2	75% of 2	75% of 2	75% of 2	75% of 2	1	1	1
AX-147249821	Araip.B05	32115358	0	2	1	1	1	1	75% of 2	1	1	1	1	1	1	1	1	1	1	1	1	1	1	1	1	1	1	1	1	1	1	1	1	1	1	1	75% of 2	75% of 2	75% of 2	75% of 2	75% of 2	75% of 2	75% of 2	1	1	1
AX-147249827	Araip.B05	32289309	2	0	1	1	1	1	75% of 0	1	1	1	1	1	1	1	1	1	1	1	1	1	1	1	1	1	1	1	1	1	1	1	1	1	1	1	75% of 0	75% of 0	75% of 0	75% of 0	75% of 0	75% of 0	75% of 0	1	1	1
AX-147222421	Araip.B05	32289674	0	2	1	1	1	1	75% of 2	1	1	1	1	1	1	1	1	1	1	1	1	1	1	1	1	1	1	1	1	1	1	1	1	1	1	1	75% of 2	75% of 2	75% of 2	75% of 2	75% of 2	75% of 2	75% of 2	1	1	1
AX-176812693	Araip.B05	35345902	0	2	1	1	1	1	75% of 2	1	1	1	1	1	1	1	1	1	1	1	1	1	1	1	1	1	1	1	1	1	1	1	1	1	1	1	75% of 2	75% of 2	75% of 2	75% of 2	75% of 2	75% of 2	75% of 2	1	1	1
AX-147222444	Araip.B05	36018149	0	2	1	1	1	1	75% of 2	1	1	1	1	1	1	1	1	1	1	1	1	1	1	1	1	1	1	1	1	1	1	1	1	1	1	1	75% of 2	75% of 2	75% of 2	75% of 2	75% of 2	75% of 2	75% of 2	1	1	1
AX-147249856	Araip.B05	36019113	2	0	1	1	1	1	75% of 0	1	1	1	1	1	1	1	1	1	1	1	1	1	1	1	1	1	1	1	1	1	1	1	1	1	1	1	75% of 0	75% of 0	75% of 0	75% of 0	75% of 0	75% of 0	75% of 0	1	1	1
AX-176791611	Araip.B05	36272049	2	0	1	1	1	1	75% of 0	1	1	1	1	1	1	1	1	1	1	1	1	1	1	1	1	1	1	1	1	1	1	1	1	1	1	1	75% of 0	75% of 0	75% of 0	75% of 0	75% of 0	75% of 0	75% of 0	1	1	1
AX-147222500	Araip.B05	36293239	0	2	1	1	1	1	75% of 2	1	1	1	1	1	1	1	1	1	1	1	1	1	1	1	1	1	1	1	1	1	1	1	1	1	1	1	75% of 2	75% of 2	75% of 2	75% of 2	75% of 2	75% of 2	75% of 2	1	1	1
AX-147222478	Araip.B05	43415063	2	0	1	1	1	1	75% of 0	1	1	1	1	1	1	1	1	1	1	1	1	1	1	1	1	1	1	1	1	1	1	1	1	1	1	1	75% of 0	75% of 0	75% of 0	75% of 0	75% of 0	75% of 0	75% of 0	1	1	1
AX-147249898	Araip.B05	44898152	0	2	1	1	1	1	75% of 2	1	1	1	1	1	1	1	1	1	1	1	1	1	1	1	1	1	1	1	1	1	1	1	1	1	1	1	75% of 2	75% of 2	75% of 2	75% of 2	75% of 2	75% of 2	75% of 2	1	1	1
AX-147249925	Araip.B05	50650006	0	2	1	1	1	1	75% of 2	1	1	1	1	1	1	1	1	1	1	1	1	1	1	1	1	1	1	1	1	1	1	1	1	1	1	1	75% of 2	75% of 2	75% of 2	75% of 2	75% of 2	75% of 2	75% of 2	1	1	1
AX-147249952	Araip.B05	62586762	0	2	1	1	1	1	75% of 2	1	1	1	1	1	1	1	1	1	1	1	1	1	1	1	1	1	1	1	1	1	1	1	1	1	1	1	75% of 2	75% of 2	75% of 2	75% of 2	75% of 2	75% of 2	75% of 2	1	1	1
AX-147222631	Araip.B05	86452676	2	0	1	1	1	1	75% of 0	1	1	1	1	1	1	1	1	1	1	1	1	1	1	1	1	1	1	1	1	1	1	1	1	1	1	1	75% of 0	75% of 0	75% of 0	75% of 0	75% of 0	75% of 0	75% of 0	1	1	1
AX-147222640	Araip.B05	91047480	2	0	1	1	1	1	75% of 0	1	1	1	1	1	1	1	1	1	1	1	1	1	1	1	1	1	1	1	1	1	1	1	1	1	1	1	75% of 0	75% of 0	75% of 0	75% of 0	75% of 0	75% of 0	75% of 0	1	1	1
AX-147223754	Araip.B05	96295599	2	0	1	1	1	1	75% of 0	1	1	1	1	1	1	1	1	1	1	1	1	1	1	1	75% of 0	1	1	1	1	1	1	1	1	1	1	1	75% of 0	0	75% of 0	0	75% of 0	0	0	1	1	1
AX-147223733	Araip.B05	103446576	2	0	2	2	1	1	75% of 0	75% of 2	75% of 2	75% of 2	75% of 2	75% of 2	75% of 2	75% of 2	75% of 2	75% of 2	75% of 2	75% of 2	75% of 2	75% of 2	75% of 2	75% of 2	1	75% of 2	75% of 2	75% of 2	75% of 2	75% of 2	75% of 2	75% of 2	75% of 2	75% of 2	75% of 2	75% of 2	1	1	1	1	1	1	1	75% of 2	75% of 2	75% of 2
AX-147223675	Araip.B05	113649419	0	2	1	1	1	1	75% of 2	1	1	1	1	1	1	1	1	1	1	1	1	1	1	1	75% of 2	1	1	1	1	1	1	1	1	1	1	1	75% of 2	75% of 2	75% of 2	75% of 2	75% of 2	75% of 2	75% of 2	1	1	1
AX-147250167	Araip.B05	116226836	0	2	1	1	1	1	75% of 2	1	1	1	1	1	1	1	1	1	1	1	1	1	1	1	1	1	1	1	1	1	1	1	1	1	1	1	75% of 2	75% of 2	75% of 2	75% of 2	75% of 2	75% of 2	75% of 2	1	1	1
AX-147250188	Araip.B05	116885935	2	0	1	1	1	1	75% of 0	1	1	1	1	1	1	1	1	1	1	1	1	1	1	1	1	1	1	1	1	1	1	1	1	1	1	1	75% of 0	75% of 0	75% of 0	75% of 0	75% of 0	75% of 0	75% of 0	1	1	1
AX-147223626	Araip.B05	117237150	2	0	1	1	1	1	75% of 0	1	1	1	1	1	1	1	1	1	1	1	1	1	1	1	1	1	1	1	1	1	1	1	1	1	1	1	75% of 0	75% of 0	75% of 0	75% of 0	75% of 0	75% of 0	75% of 0	1	1	1
AX-147250205	Araip.B05	117696394	0	2	1	1	1	1	75% of 2	1	1	1	1	1	1	1	1	1	1	1	1	1	1	1	1	1	1	1	1	1	1	1	1	1	1	1	75% of 2	75% of 2	75% of 2	75% of 2	75% of 2	75% of 2	75% of 2	1	1	1
AX-147223567	Araip.B05	119922790	0	2	1	1	1	1	75% of 2	1	1	1	1	1	1	1	1	1	1	1	1	1	1	1	1	1	1	1	1	1	1	1	1	1	1	1	75% of 2	75% of 2	75% of 2	75% of 2	75% of 2	75% of 2	75% of 2	1	1	1
AX-147250353	Araip.B05	124718344	2	0	1	1	1	1	75% of 0	1	1	1	1	1	1	1	1	1	1	1	1	1	1	1	1	1	1	1	1	1	1	1	1	1	1	1	75% of 0	75% of 0	75% of 0	75% of 0	75% of 0	75% of 0	75% of 0	1	1	1
AX-147250373	Araip.B05	124967139	2	0	1	1	1	1	75% of 0	1	1	1	1	1	1	1	1	1	1	1	1	1	1	1	1	1	1	1	1	1	1	1	1	1	1	1	75% of 0	75% of 0	75% of 0	75% of 0	75% of 0	75% of 0	75% of 0	1	1	1
AX-147250418	Araip.B05	126949239	0	2	1	1	1	1	75% of 2	1	1	1	1	1	1	1	1	1	1	1	1	1	1	1	1	1	1	1	1	1	1	1	1	1	1	1	75% of 2	75% of 2	75% of 2	75% of 2	75% of 2	75% of 2	75% of 2	1	1	1
AX-147250449	Araip.B05	127501656	2	0	1	1	1	1	75% of 0	1	1	1	1	1	1	1	1	1	1	1	1	1	1	1	1	1	1	1	1	1	1	1	1	1	1	1	75% of 0	75% of 0	75% of 0	75% of 0	75% of 0	75% of 0	75% of 0	1	1	1
AX-147223379	Araip.B05	129141719	0	2	1	1	1	1	75% of 2	1	1	1	1	1	1	1	1	1	1	1	1	1	1	1	1	1	1	1	1	1	1	1	1	1	1	1	75% of 2	75% of 2	75% of 2	75% of 2	75% of 2	75% of 2	75% of 2	1	1	1
AX-147222657	Araip.B05	130005877	0	2	1	1	1	1	75% of 2	1	1	1	1	1	1	1	1	1	1	1	1	1	1	1	1	1	1	1	1	1	1	1	1	1	1	1	75% of 2	75% of 2	75% of 2	75% of 2	75% of 2	75% of 2	75% of 2	1	1	1
AX-147250531	Araip.B05	132426909	0	2	1	1	1	1	75% of 2	1	1	1	1	1	1	1	1	1	1	1	1	1	1	1	1	1	1	1	1	1	1	1	1	1	1	1	75% of 2	75% of 2	75% of 2	75% of 2	75% of 2	75% of 2	75% of 2	1	1	1
AX-147223263	Araip.B05	134780534	0	2	1	1	1	1	75% of 2	1	1	1	1	1	1	1	1	1	1	1	1	1	1	1	1	1	1	1	1	1	1	1	1	1	1	1	75% of 2	75% of 2	75% of 2	75% of 2	75% of 2	75% of 2	75% of 2	1	1	1
AX-147250640	Araip.B05	135932744	0	2	1	1	1	1	75% of 2	1	1	1	1	1	1	1	1	1	1	1	1	1	1	1	1	1	1	1	1	1	1	1	1	NoCall	1	1	75% of 2	75% of 2	75% of 2	75% of 2	75% of 2	75% of 2	75% of 2	1	1	1
AX-147250683	Araip.B05	137264012	0	2	1	1	1	1	75% of 2	1	1	1	1	1	1	1	1	1	1	1	1	1	1	1	1	1	1	1	1	1	1	1	1	1	1	1	75% of 2	75% of 2	75% of 2	75% of 2	75% of 2	75% of 2	75% of 2	1	1	1
AX-147250684	Araip.B05	137264205	0	2	1	1	1	1	75% of 2	1	1	1	1	1	1	1	1	1	1	1	1	1	1	1	1	1	1	1	1	1	1	1	1	1	1	1	75% of 2	75% of 2	75% of 2	75% of 2	75% of 2	75% of 2	75% of 2	1	1	1
AX-147223172	Araip.B05	137832935	2	0	1	1	1	1	75% of 0	1	1	1	1	1	1	1	1	1	1	1	1	1	1	1	1	1	1	1	1	1	1	1	1	1	1	1	75% of 0	75% of 0	75% of 0	75% of 0	75% of 0	75% of 0	75% of 0	1	1	1
AX-147250725	Araip.B05	138223448	0	2	1	1	1	1	75% of 2	1	1	1	1	1	1	1	1	1	1	1	1	1	1	1	1	1	1	1	1	1	1	1	1	1	1	1	75% of 2	75% of 2	75% of 2	75% of 2	75% of 2	75% of 2	75% of 2	1	1	1
AX-147223135	Araip.B05	138256845	0	2	1	1	1	1	75% of 2	1	1	1	1	1	1	1	1	1	1	1	1	1	1	1	1	1	1	1	1	1	1	1	1	1	1	1	75% of 2	75% of 2	75% of 2	75% of 2	75% of 2	75% of 2	75% of 2	1	1	1
AX-147223117	Araip.B05	138769282	0	2	1	1	1	1	75% of 2	1	1	1	1	1	1	1	1	1	1	1	1	1	1	1	1	1	1	1	1	1	1	1	1	0	1	1	75% of 2	75% of 2	75% of 2	75% of 2	75% of 2	75% of 2	75% of 2	1	1	1
AX-147250772	Araip.B05	139287354	2	0	1	1	1	1	75% of 0	1	1	1	1	1	1	1	1	1	1	1	1	1	1	1	1	1	1	1	1	1	1	1	1	1	1	1	75% of 0	75% of 0	75% of 0	75% of 0	75% of 0	75% of 0	75% of 0	1	1	1
AX-147250798	Araip.B05	139990135	2	0	1	1	1	1	75% of 0	1	1	1	1	1	1	1	1	1	1	1	1	1	1	1	1	1	1	1	1	1	1	1	1	1	1	1	75% of 0	75% of 0	75% of 0	75% of 0	75% of 0	75% of 0	75% of 0	1	1	1
AX-147250807	Araip.B05	140230510	2	0	1	1	1	1	75% of 0	1	1	1	1	1	1	1	1	1	1	1	1	1	1	1	1	1	1	1	1	1	1	1	1	1	1	1	75% of 0	75% of 0	75% of 0	75% of 0	75% of 0	75% of 0	75% of 0	1	1	1
AX-147250821	Araip.B05	140708277	0	2	1	1	1	1	75% of 2	1	1	1	1	1	1	1	1	1	1	1	1	1	1	1	1	1	1	1	1	1	1	1	1	1	1	1	75% of 2	75% of 2	75% of 2	75% of 2	75% of 2	75% of 2	75% of 2	1	1	1
AX-147222941	Araip.B05	141738121	0	2	1	1	1	1	75% of 2	1	1	1	1	1	1	1	1	1	1	1	1	1	1	1	1	1	1	1	1	1	1	1	1	1	1	1	75% of 2	75% of 2	75% of 2	75% of 2	75% of 2	75% of 2	75% of 2	1	1	1
AX-147222887	Araip.B05	142372310	2	0	1	1	1	1	75% of 0	1	1	1	1	1	1	1	1	1	1	1	1	1	1	1	1	1	1	1	1	1	1	1	1	1	1	1	75% of 0	75% of 0	75% of 0	75% of 0	75% of 0	75% of 0	75% of 0	1	1	1
AX-147250953	Araip.B05	142757147	0	2	1	1	1	1	75% of 2	1	1	1	1	1	1	1	1	1	1	1	1	1	1	1	1	1	1	1	1	1	1	1	1	1	1	1	75% of 2	75% of 2	75% of 2	75% of 2	75% of 2	75% of 2	75% of 2	1	1	1
AX-147222868	Araip.B05	142815162	2	0	1	1	1	1	75% of 0	1	1	1	1	1	1	1	1	1	1	1	1	1	1	1	1	1	1	1	1	1	1	1	1	1	1	1	75% of 0	75% of 0	75% of 0	75% of 0	75% of 0	75% of 0	75% of 0	1	1	1
AX-147251017	Araip.B05	143640931	0	2	1	1	1	1	75% of 2	1	1	1	1	1	1	1	1	1	1	1	1	1	1	1	1	1	1	1	1	1	1	1	1	1	1	1	75% of 2	75% of 2	75% of 2	75% of 2	75% of 2	75% of 2	75% of 2	1	1	1
AX-147222791	Araip.B05	143715044	2	0	1	1	1	1	75% of 0	1	1	1	1	1	1	1	1	1	1	1	1	1	1	1	1	1	1	1	1	1	1	1	1	1	1	1	75% of 0	75% of 0	75% of 0	75% of 0	75% of 0	75% of 0	75% of 0	1	1	1
AX-147251045	Araip.B05	143858735	0	2	1	1	1	1	75% of 2	1	1	1	1	1	1	1	1	1	1	1	1	1	1	1	1	1	1	1	1	1	1	1	1	1	1	1	75% of 2	75% of 2	75% of 2	75% of 2	75% of 2	75% of 2	75% of 2	1	1	1
AX-147222751	Araip.B05	144565826	0	2	1	1	1	1	75% of 2	1	1	1	1	1	1	1	1	1	1	1	1	1	1	1	1	1	1	1	1	1	1	1	1	1	1	1	75% of 2	75% of 2	75% of 2	75% of 2	75% of 2	75% of 2	75% of 2	1	1	1
AX-147222750	Araip.B05	144566028	0	2	1	1	1	1	75% of 2	1	1	1	1	1	1	1	1	1	1	1	1	1	1	1	1	1	1	1	1	1	1	1	1	1	1	1	75% of 2	75% of 2	75% of 2	75% of 2	75% of 2	75% of 2	75% of 2	1	1	1
AX-147222693	Araip.B05	145358753	2	0	1	1	1	1	75% of 0	1	1	1	1	1	1	1	1	1	1	1	1	1	1	1	75% of 0	1	1	1	1	1	1	1	1	1	1	1	75% of 0	75% of 0	75% of 0	75% of 0	75% of 0	75% of 0	75% of 0	1	1	1
AX-147251140	Araip.B05	145427649	0	2	1	1	1	1	75% of 2	1	1	1	1	NoCall	1	1	1	1	1	1	1	1	1	1	75% of 2	1	1	1	1	1	1	1	1	1	1	1	75% of 2	75% of 2	75% of 2	75% of 2	75% of 2	75% of 2	75% of 2	1	1	1
AX-147223763	Araip.B05	145698740	0	2	1	1	1	1	75% of 2	1	1	1	1	1	1	1	1	1	1	1	1	1	1	1	75% of 2	1	1	1	1	1	1	1	1	1	1	1	75% of 2	75% of 2	75% of 2	75% of 2	75% of 2	75% of 2	75% of 2	1	1	1
AX-147223784	Araip.B05	146001486	2	0	1	1	1	1	75% of 0	1	1	1	1	1	1	1	1	1	1	1	1	1	1	1	75% of 0	1	1	1	1	1	1	1	1	1	1	1	75% of 0	75% of 0	75% of 0	75% of 0	75% of 0	75% of 0	75% of 0	1	1	1
AX-147223799	Araip.B05	146348069	0	2	1	1	1	1	75% of 2	1	1	1	1	1	1	1	1	1	1	1	1	1	1	1	75% of 2	1	1	1	1	1	1	1	1	1	1	1	75% of 2	75% of 2	75% of 2	75% of 2	75% of 2	75% of 2	75% of 2	1	1	1
AX-147251259	Araip.B05	147371907	0	2	1	1	1	1	75% of 2	1	1	1	1	1	1	1	1	1	1	1	1	1	1	1	75% of 0	1	1	1	1	1	1	1	1	1	1	1	75% of 2	75% of 2	75% of 2	75% of 2	75% of 2	75% of 2	75% of 2	1	1	1
AX-147223874	Araip.B05	147376205	2	0	1	1	1	1	75% of 0	1	1	1	1	1	1	1	1	1	1	1	1	1	1	1	75% of 0	1	1	1	1	1	1	1	1	1	1	1	75% of 0	75% of 0	75% of 0	75% of 0	75% of 0	75% of 0	75% of 0	1	1	1
AX-147251266	Araip.B05	147409221	2	0	1	1	1	1	75% of 0	1	1	1	1	1	1	1	1	1	1	1	1	1	1	1	75% of 0	1	1	1	1	1	1	1	1	1	1	1	75% of 0	75% of 0	75% of 0	75% of 0	75% of 0	75% of 0	75% of 0	1	1	1
AX-147223958	Araip.B05	148997085	0	2	1	1	1	1	75% of 2	1	1	1	1	1	1	1	1	1	1	1	1	1	1	1	75% of 2	1	1	1	1	1	1	1	1	1	1	1	75% of 2	75% of 2	75% of 2	75% of 2	75% of 2	75% of 2	75% of 2	1	1	1
AX-147251516	Araip.B06	249894	0	2	1	1	1	1	1	1	1	1	1	1	1	1	1	1	1	1	0	1	1	1	1	1	1	1	1	1	0	1	1	1	1	1	1	1	1	1	1	1	1	1	1	1
AX-176791666	Araip.B06	336201	0	2	1	1	1	1	1	1	1	1	1	1	1	1	1	1	1	1	75% of 0	1	1	1	1	1	1	1	1	1	1	1	1	1	1	1	1	1	1	1	1	1	1	1	1	1
AX-147251529	Araip.B06	337522	2	0	1	1	1	1	1	1	1	1	1	1	1	1	1	1	1	1	75% of 2	1	1	1	1	1	1	1	1	1	1	1	1	1	1	1	1	1	1	1	1	1	1	1	1	1
AX-147251542	Araip.B06	493896	2	0	1	1	1	1	1	1	1	1	1	1	1	1	NoCall	1	1	1	75% of 2	1	1	1	1	1	1	1	1	1	1	1	1	1	1	1	1	1	1	1	1	1	1	1	1	1
AX-147251550	Araip.B06	553160	2	0	1	1	1	1	1	1	1	1	1	1	1	1	1	1	1	1	75% of 2	1	1	1	1	1	1	1	1	1	1	1	1	1	1	1	1	1	1	1	1	1	1	1	1	1
AX-147251564	Araip.B06	791984	0	2	1	1	1	1	1	1	1	1	1	1	1	1	1	1	1	1	75% of 0	1	1	1	1	1	1	1	1	1	1	1	1	1	1	1	1	1	1	1	1	1	1	1	1	1
AX-147225045	Araip.B06	1677990	0	2	1	1	1	1	1	1	1	1	1	1	1	1	1	1	1	1	75% of 0	1	1	1	1	1	1	1	75% of 2	1	1	1	1	1	1	1	1	1	1	1	1	1	1	1	1	1
AX-147225038	Araip.B06	1753438	0	2	1	1	1	1	1	1	1	1	1	1	1	1	1	1	1	1	75% of 0	1	1	1	1	1	1	1	1	1	1	1	1	1	1	1	1	1	1	1	1	1	1	1	1	1
AX-147225032	Araip.B06	1793480	2	0	1	1	1	1	1	1	1	1	1	1	1	1	1	1	1	1	75% of 2	1	1	1	1	1	1	1	1	1	1	1	1	1	1	1	1	1	1	1	1	1	1	1	1	1
AX-147225007	Araip.B06	1970944	0	2	1	1	1	1	1	1	1	1	1	1	1	1	1	1	1	1	75% of 0	1	1	1	1	1	1	1	1	1	1	1	1	1	1	1	1	1	1	1	1	1	1	1	1	1
AX-147251681	Araip.B06	2118397	2	0	1	1	1	1	1	1	1	1	1	1	1	1	1	1	1	1	75% of 2	1	1	1	1	1	1	1	1	1	1	1	1	1	1	1	1	1	1	1	1	1	1	1	1	1
AX-147224991	Araip.B06	2182144	2	0	1	1	1	1	1	1	1	1	1	1	1	1	1	1	1	1	75% of 2	1	1	1	1	1	1	1	1	1	1	1	1	1	1	1	1	1	1	1	1	1	1	1	1	1
AX-147224987	Araip.B06	2190010	2	0	1	1	1	1	1	1	1	1	1	1	1	1	1	1	1	1	75% of 2	1	1	1	1	1	1	1	75% of 0	1	1	1	1	1	1	1	1	1	1	1	1	1	1	1	1	1
AX-176791886	Araip.B06	2311826	2	0	1	1	1	1	1	1	1	1	1	1	1	1	1	1	1	1	75% of 2	1	1	1	1	1	1	1	1	1	1	1	1	1	1	1	1	1	1	1	1	1	1	1	1	1
AX-147224975	Araip.B06	2360150	2	0	1	1	1	1	2	1	1	1	1	1	1	1	1	1	1	1	75% of 2	1	1	1	1	1	1	1	75% of 0	1	1	1	1	1	1	1	1	1	1	1	1	1	1	1	1	1
AX-147224968	Araip.B06	2813698	0	2	1	1	1	1	1	1	1	1	1	1	1	1	1	1	1	1	75% of 0	1	1	1	1	1	1	1	1	1	1	1	1	1	1	1	1	1	1	1	1	1	1	1	1	1
AX-176792164	Araip.B06	2820465	0	2	1	1	1	1	1	1	1	1	1	1	1	1	1	1	1	1	75% of 0	1	1	1	1	1	1	1	1	1	1	1	1	1	1	1	1	1	1	1	1	1	1	1	1	1
AX-147224934	Araip.B06	3385864	2	0	1	1	1	1	1	1	1	1	1	1	1	1	1	1	1	1	75% of 2	1	1	1	1	1	1	1	75% of 0	1	1	1	1	1	1	1	1	1	1	1	1	1	1	1	1	1
AX-147251786	Araip.B06	3524354	2	0	1	1	1	1	1	1	1	1	1	1	1	1	1	1	1	1	75% of 2	1	1	1	1	1	1	1	1	1	1	1	1	1	1	1	1	1	1	1	1	1	1	1	1	1
AX-147224923	Araip.B06	3618146	0	2	1	1	1	1	1	1	1	1	1	1	1	1	1	1	1	1	75% of 0	1	1	1	1	1	1	1	1	1	1	1	1	1	1	1	1	1	1	1	1	1	1	1	1	1
AX-147224922	Araip.B06	3618472	2	0	1	1	1	1	1	1	1	1	1	1	1	1	1	1	1	1	75% of 2	1	1	1	1	1	1	1	1	1	1	1	1	1	1	1	1	1	1	1	1	1	1	1	1	1
AX-147251836	Araip.B06	4240318	2	0	1	1	1	1	1	1	1	1	1	1	1	1	1	1	1	1	75% of 2	1	1	1	1	1	1	1	1	1	1	1	1	1	1	1	1	1	1	1	1	1	1	1	1	1
AX-147251857	Araip.B06	4435413	0	2	1	1	1	1	1	1	1	1	1	1	1	1	1	1	1	1	75% of 0	1	1	1	1	1	1	1	1	1	1	1	1	1	1	1	1	1	1	1	1	1	1	1	1	1
AX-147251883	Araip.B06	4844463	2	0	1	1	1	1	1	1	1	1	1	1	1	1	1	1	1	1	75% of 2	1	1	1	1	1	1	1	1	1	1	1	1	1	1	1	1	1	1	1	1	1	1	1	1	1
AX-176791439	Araip.B06	5086623	2	0	1	1	1	1	1	1	1	1	1	1	1	1	1	1	1	1	75% of 2	1	1	1	1	1	1	1	1	1	1	1	1	1	1	1	1	1	1	1	1	1	1	1	1	1
AX-147251911	Araip.B06	5091360	2	0	1	1	1	1	1	1	1	1	1	1	1	1	1	1	1	1	75% of 2	1	1	1	1	1	1	1	75% of 0	1	1	1	1	1	1	1	1	1	1	1	1	1	1	1	1	1
AX-176791810	Araip.B06	5435611	0	2	1	1	1	1	1	1	1	1	1	1	1	1	1	75% of 0	1	1	75% of 0	1	1	1	1	1	1	1	1	1	1	1	1	1	1	1	1	1	1	1	1	1	1	1	1	1
AX-147251944	Araip.B06	5439787	2	0	1	1	1	1	1	1	1	1	1	1	1	1	1	1	1	1	75% of 2	1	1	1	1	1	1	1	1	1	1	1	1	1	1	1	1	1	1	1	1	1	1	1	1	1
AX-147251956	Araip.B06	5738484	2	0	1	1	1	1	1	1	1	1	1	1	1	1	1	1	1	1	75% of 2	1	1	1	1	1	1	1	1	1	1	1	1	1	1	1	1	1	1	1	1	1	1	1	1	1
AX-147252014	Araip.B06	7061116	0	2	1	1	1	1	1	1	1	1	1	1	1	1	1	1	1	1	75% of 0	1	1	1	1	1	1	1	1	1	1	1	1	1	1	1	1	1	1	1	1	1	1	1	1	1
AX-147252023	Araip.B06	7152361	2	0	1	1	1	1	1	1	1	1	1	1	1	1	1	1	1	1	75% of 2	1	1	1	1	1	1	2	1	1	1	1	1	1	1	1	1	1	1	1	1	1	1	1	1	1
AX-147224701	Araip.B06	7406881	2	0	1	1	1	1	1	1	1	1	1	1	1	1	1	1	1	1	75% of 2	1	1	1	1	1	1	1	1	1	1	1	1	1	1	1	1	1	1	1	1	1	1	1	1	1
AX-147224692	Araip.B06	7482192	0	2	1	1	1	1	1	1	1	1	1	1	1	1	1	1	1	1	75% of 0	1	1	1	1	1	1	1	1	1	1	1	1	1	1	1	1	1	1	1	1	1	1	1	1	1
AX-147252035	Araip.B06	7482924	2	0	1	1	1	1	1	1	1	1	1	1	1	1	1	1	1	1	75% of 2	1	1	1	1	1	1	1	75% of 0	1	1	1	1	1	1	1	1	1	1	1	1	1	1	1	1	1
AX-147252042	Araip.B06	7615525	2	1	1	1	1	1	1	1	1	1	1	1	1	1	1	1	1	1	75% of 2	1	1	1	1	1	1	1	1	1	1	1	1	1	1	1	1	1	1	1	1	1	1	1	1	1
AX-147224676	Araip.B06	7697646	0	1	1	1	1	1	1	1	1	1	1	1	1	1	1	1	1	1	75% of 0	1	1	1	1	1	1	1	1	1	1	1	1	1	1	1	1	1	1	1	1	1	1	1	1	1
AX-176792064	Araip.B06	8650814	2	0	1	1	1	1	1	1	1	1	1	1	1	1	1	1	1	1	1	1	1	1	1	1	1	1	1	1	1	1	1	1	1	1	1	1	1	0	1	1	1	1	1	1
AX-147224637	Araip.B06	8909128	0	2	1	1	1	1	1	1	1	1	1	1	1	1	1	1	1	1	75% of 0	1	1	1	1	1	1	1	1	1	1	1	1	1	1	1	1	1	1	1	1	1	1	1	1	1
AX-176811898	Araip.B06	9333912	0	2	1	1	1	1	1	1	1	1	1	1	1	1	1	1	1	1	0	1	1	1	1	1	1	1	1	1	1	1	1	1	1	1	1	1	1	1	1	1	1	1	1	1
AX-147252116	Araip.B06	9829631	2	0	1	1	1	1	1	1	1	1	1	1	1	1	1	1	1	1	75% of 2	1	1	1	1	1	1	1	75% of 2	1	1	1	1	1	1	1	1	1	1	1	1	1	1	1	1	1
AX-147252128	Araip.B06	10058867	0	2	1	1	1	1	1	1	1	1	1	1	1	1	1	1	1	1	75% of 0	1	1	1	1	1	1	1	1	1	1	1	1	1	1	1	1	1	1	1	1	1	1	1	1	1
AX-147252132	Araip.B06	10093531	2	0	1	1	1	1	1	1	1	1	1	1	1	1	1	1	1	1	75% of 2	1	1	1	1	1	1	1	1	1	1	1	1	1	1	1	1	1	1	1	1	1	1	1	1	1
AX-147252165	Araip.B06	10985630	0	2	1	1	1	1	1	1	1	1	1	1	1	1	1	1	1	1	75% of 0	1	1	1	1	1	1	1	1	1	1	1	1	1	1	1	1	1	1	1	1	1	1	1	1	1
AX-147224517	Araip.B06	11226741	0	2	1	1	1	1	1	1	1	1	1	1	1	1	1	1	1	1	75% of 0	1	1	1	1	1	1	1	1	1	1	1	1	1	1	1	1	1	1	1	1	1	1	1	1	1
AX-147224493	Araip.B06	12303142	2	0	1	1	1	1	1	1	1	1	1	1	1	1	1	1	1	1	75% of 2	1	1	1	1	1	1	1	1	1	1	1	1	1	1	1	1	1	1	1	1	1	1	1	1	1
AX-176812980	Araip.B06	12432915	0	NoCall	1	1	1	1	1	1	1	1	1	1	1	1	1	1	1	1	75% of 0	1	1	1	1	1	1	1	1	1	1	1	1	1	1	1	1	1	1	1	1	1	1	1	1	1
AX-147252249	Araip.B06	12787062	0	1	1	1	1	1	1	1	1	1	1	1	1	1	1	1	1	1	75% of 0	1	1	1	1	1	1	1	1	1	1	1	1	1	1	1	1	1	1	1	1	1	1	1	1	1
AX-147252256	Araip.B06	12960639	0	1	1	1	1	1	1	1	1	1	1	1	1	1	1	1	1	1	75% of 0	1	1	1	1	1	1	1	1	1	1	1	1	1	1	1	1	1	1	1	1	1	1	1	1	1
AX-147252257	Araip.B06	13011374	2	0	1	1	1	1	1	1	1	1	1	1	1	1	1	1	1	1	75% of 2	1	1	1	1	1	1	1	75% of 0	1	1	1	1	1	1	1	1	1	1	1	1	1	1	1	1	1
AX-147252260	Araip.B06	13018840	2	0	1	1	1	1	1	1	1	1	1	1	1	1	1	1	1	1	75% of 2	1	1	1	1	1	1	1	1	1	1	1	1	1	1	1	1	1	1	1	1	1	1	1	1	1
AX-147252269	Araip.B06	13214406	2	0	1	1	1	1	1	1	1	1	1	1	1	1	1	1	1	1	75% of 2	1	1	1	1	1	1	1	1	1	1	1	1	1	1	1	1	1	1	1	1	1	1	1	1	1
AX-147252278	Araip.B06	13373297	2	1	1	1	1	1	1	1	1	1	1	1	1	1	1	1	1	1	75% of 2	1	1	1	1	1	1	1	1	1	1	1	1	1	1	1	1	1	1	1	1	1	1	1	1	1
AX-176791446	Araip.B06	13423987	0	2	1	1	1	1	1	1	1	1	1	1	1	1	1	1	1	1	75% of 0	1	1	1	1	1	1	1	1	1	1	1	1	1	1	1	1	1	1	1	1	1	1	1	1	1
AX-147252284	Araip.B06	13455198	2	0	1	1	1	1	1	1	1	1	1	1	1	75% of 2	1	1	1	1	75% of 2	1	1	1	1	1	1	1	1	1	1	1	1	1	1	1	1	1	1	1	1	1	1	1	1	1
AX-147252294	Araip.B06	13788999	2	0	1	1	1	1	1	1	1	1	1	1	1	1	1	1	1	1	2	1	1	1	1	1	1	1	1	1	1	1	1	1	1	1	1	1	1	1	1	1	1	1	1	1
AX-147224401	Araip.B06	13963506	2	0	1	1	1	1	1	1	1	1	1	1	1	1	1	1	1	1	75% of 2	1	1	1	1	1	1	1	1	1	1	1	1	1	1	1	1	1	1	1	1	1	1	1	1	1
AX-147252321	Araip.B06	14274878	0	2	1	1	1	1	1	1	1	1	1	1	1	1	1	1	1	1	75% of 2	1	1	1	1	1	1	1	1	1	1	1	1	1	1	1	1	1	1	1	1	1	1	1	1	1
AX-147252332	Araip.B06	14378469	0	2	1	1	1	1	1	1	1	1	1	1	1	1	1	1	1	1	75% of 0	1	1	1	1	1	1	1	1	1	1	1	1	1	1	1	1	1	1	1	1	1	1	1	1	1
AX-147224284	Araip.B06	16912769	2	0	1	1	1	1	1	1	1	1	1	1	1	1	1	1	1	1	75% of 2	1	1	1	1	1	1	1	1	1	1	1	1	1	1	1	1	1	1	1	1	1	1	1	1	1
AX-147252508	Araip.B06	20090473	0	2	1	1	1	1	1	1	1	1	1	1	1	1	1	1	1	1	1	1	1	1	1	75% of 0	1	1	1	1	1	1	1	1	1	1	1	1	1	1	1	1	1	1	1	1
AX-147224217	Araip.B06	20367604	2	1	1	1	1	1	1	1	1	1	1	1	1	1	1	1	1	1	75% of 2	1	1	1	1	1	1	1	1	1	1	1	1	1	1	1	1	1	1	1	1	1	1	1	1	1
AX-147224124	Araip.B06	24208150	2	0	1	1	1	1	1	1	1	1	1	1	1	1	1	1	1	1	75% of 2	1	1	1	1	1	1	1	1	1	1	1	1	1	1	1	1	1	1	1	1	1	1	1	1	1
AX-147252629	Araip.B06	24430633	0	1	1	1	1	1	1	1	1	1	1	1	1	1	1	1	1	1	75% of 0	1	1	1	1	1	1	1	1	1	1	1	1	1	1	1	1	1	1	1	1	1	1	1	1	1
AX-147252751	Araip.B06	32079561	2	0	1	1	1	1	1	1	1	1	1	1	1	1	1	1	1	1	75% of 2	1	1	1	1	1	1	1	1	1	1	1	1	1	1	1	1	1	1	1	1	1	1	1	1	1
AX-147225265	Araip.B06	32128774	2	0	1	1	1	1	1	1	1	1	1	1	1	1	1	1	1	1	75% of 2	1	1	1	1	1	1	1	1	1	1	1	1	1	1	1	1	1	1	1	1	1	1	1	1	1
AX-147225355	Araip.B06	36859951	2	0	1	1	1	1	1	1	1	1	1	1	1	1	1	1	1	1	75% of 2	1	1	1	1	1	1	1	75% of 0	1	1	1	1	1	1	1	1	1	1	1	1	1	1	1	1	1
AX-147252822	Araip.B06	43416782	2	0	1	1	1	1	1	1	1	1	1	1	1	1	1	1	1	1	75% of 2	1	1	1	1	1	1	1	1	1	1	1	1	1	1	1	1	1	1	1	1	1	1	1	1	1
AX-147252823	Araip.B06	43417260	2	0	1	1	1	1	1	1	1	1	1	1	1	1	1	1	1	1	75% of 2	1	1	1	1	1	1	1	1	1	1	1	1	1	1	1	1	1	1	1	1	1	1	1	1	1
AX-147225351	Araip.B06	46451377	2	0	1	1	1	1	1	1	1	1	1	1	1	1	1	1	1	1	75% of 2	1	1	1	1	1	1	1	1	1	1	1	1	1	1	1	1	1	1	1	1	1	1	1	1	1
AX-147252897	Araip.B06	71889393	2	0	1	1	1	1	1	1	1	1	1	1	1	1	1	1	1	1	75% of 2	1	1	1	1	1	1	1	1	1	1	1	1	1	1	1	1	1	1	1	1	1	1	1	1	1
AX-147252899	Araip.B06	72788532	2	0	1	1	1	1	1	1	1	1	1	1	1	1	1	1	1	1	75% of 2	1	1	1	1	1	1	1	1	1	1	1	1	1	1	1	1	1	1	1	1	1	1	1	1	1
AX-147252924	Araip.B06	83213047	0	2	1	1	1	1	1	1	1	1	1	1	1	1	1	1	1	1	75% of 0	1	1	1	1	1	1	1	1	1	1	1	1	1	1	1	1	1	1	1	1	1	1	1	1	1
AX-147225490	Araip.B06	88868242	0	2	1	1	1	1	1	1	1	1	1	1	1	1	1	1	1	1	75% of 0	1	1	1	1	1	1	1	1	1	1	1	1	1	1	1	1	1	1	1	1	1	1	1	1	1
AX-147225533	Araip.B06	93776286	2	0	1	1	1	1	1	1	1	1	1	1	1	1	1	1	1	1	75% of 2	1	1	1	1	1	1	1	1	1	1	1	1	1	1	1	1	1	1	1	1	1	1	1	1	1
AX-147225693	Araip.B06	106640156	0	2	1	1	1	1	1	1	1	1	1	1	1	NoCall	1	1	1	1	75% of 0	1	1	1	1	1	1	1	1	1	1	1	1	1	1	1	1	1	1	1	1	1	1	1	1	1
AX-147225771	Araip.B06	110859588	0	2	1	1	1	1	1	1	1	1	1	75% of 2	1	1	1	1	1	1	75% of 0	1	1	1	1	1	1	1	1	1	1	1	1	1	1	1	1	1	1	1	1	1	1	1	1	1
AX-176820861	Araip.B06	119531716	0	2	1	1	1	1	1	1	1	1	1	1	1	1	1	1	1	1	1	1	1	1	1	0	1	1	1	1	1	1	1	1	1	1	1	1	1	1	1	1	1	1	1	1
AX-147225921	Araip.B06	120805084	0	2	1	1	1	1	1	1	1	1	1	1	1	1	1	1	1	1	1	1	1	1	1	1	1	1	75% of 2	1	1	1	1	1	1	1	1	1	1	1	1	1	1	1	1	1
AX-147225968	Araip.B06	121832857	0	2	1	1	1	1	1	1	1	1	1	1	1	1	1	1	1	1	1	1	1	1	1	1	75% of 2	1	75% of 2	1	1	1	1	1	1	1	1	1	1	1	1	1	1	1	1	1
AX-147253461	Araip.B06	122027502	0	2	1	1	1	1	1	1	1	1	1	1	1	1	1	1	1	1	1	1	1	1	1	NoCall	2	1	1	1	1	1	1	1	1	1	1	1	1	1	1	1	1	1	1	1
AX-147225972	Araip.B06	122028511	2	0	1	1	1	1	1	1	1	1	1	1	1	1	1	1	1	1	1	1	1	1	1	1	0	1	1	1	1	1	1	1	1	1	1	1	1	1	1	1	1	1	1	1
AX-147225985	Araip.B06	122584355	0	2	1	1	1	1	0	1	1	1	1	1	1	1	1	1	1	1	1	1	1	1	1	1	75% of 2	1	75% of 2	1	1	1	1	1	1	1	1	1	1	1	1	1	1	1	1	1
AX-176792040	Araip.B06	123590343	0	2	1	1	1	1	1	1	1	1	0	1	1	1	1	1	1	1	1	1	1	1	1	1	1	1	1	1	1	1	1	1	1	1	1	1	1	1	1	1	1	1	1	1
AX-147253555	Araip.B06	124628344	2	0	1	1	1	1	1	1	1	1	75% of 2	1	1	1	1	1	1	1	1	1	1	1	1	1	75% of 0	1	1	1	1	1	1	1	1	1	1	1	1	1	1	1	1	1	1	1
AX-147226062	Araip.B06	125020507	0	2	1	1	1	1	1	1	1	1	75% of 0	1	1	1	1	1	1	1	1	1	1	1	1	1	75% of 2	1	1	1	1	1	1	1	1	1	1	1	1	1	1	1	1	1	1	1
AX-147226073	Araip.B06	125117048	2	0	1	1	1	1	1	1	1	1	75% of 2	1	1	1	1	1	1	1	1	1	1	1	1	1	75% of 0	1	75% of 0	1	1	1	1	1	1	1	1	1	1	1	1	1	1	1	1	1
AX-147226088	Araip.B06	125415055	0	2	1	1	1	1	1	1	1	1	75% of 0	1	1	1	1	1	1	1	1	1	1	1	1	1	75% of 2	1	1	1	1	1	1	1	1	1	1	1	1	1	1	1	1	1	1	1
AX-147253612	Araip.B06	125478078	0	2	1	1	1	1	1	1	1	1	75% of 0	1	1	1	1	1	1	1	1	1	1	1	1	1	75% of 2	1	1	1	1	1	1	1	1	1	1	1	1	1	1	1	1	1	1	1
AX-147226106	Araip.B06	125704678	0	2	1	1	1	1	1	1	1	1	75% of 0	1	1	1	1	1	1	1	1	1	1	1	1	1	75% of 2	1	75% of 2	1	1	1	1	1	1	1	1	1	1	1	1	1	1	1	1	1
AX-147226126	Araip.B06	126315503	0	2	1	1	1	1	1	1	1	1	75% of 0	1	1	1	1	1	1	1	1	1	1	1	1	1	75% of 2	1	1	1	1	1	1	1	1	1	1	1	1	1	1	1	1	1	1	1
AX-147226168	Araip.B06	127136710	0	2	1	1	1	1	1	1	1	1	75% of 0	1	1	1	1	1	1	1	1	1	1	1	1	1	75% of 2	1	1	1	1	1	1	1	1	1	1	1	1	75% of 2	1	1	1	1	1	1
AX-147253688	Araip.B06	127137852	0	2	1	1	1	1	1	1	1	1	75% of 0	1	1	1	1	1	1	1	1	1	1	1	1	1	75% of 2	1	1	1	1	1	1	1	1	1	1	1	1	75% of 2	1	1	1	1	1	1
AX-147253700	Araip.B06	127392267	0	2	1	1	1	1	1	1	1	1	75% of 0	1	1	1	1	1	1	1	1	1	1	1	1	1	75% of 2	1	1	1	1	1	1	1	1	1	1	1	1	75% of 2	1	1	1	1	1	1
AX-147253712	Araip.B06	127603924	0	2	1	1	1	1	1	1	1	1	75% of 0	1	1	1	1	1	1	1	1	1	1	1	1	1	75% of 2	1	1	1	1	1	1	1	1	1	1	1	1	75% of 2	1	1	1	1	1	1
AX-147226220	Araip.B06	128202341	0	2	1	1	1	1	1	1	1	1	75% of 0	1	1	1	1	1	1	1	1	1	1	1	1	1	75% of 2	1	1	1	1	1	1	1	1	1	1	1	1	75% of 2	1	1	1	1	1	1
AX-147253746	Araip.B06	128352935	2	0	1	1	1	1	1	1	1	1	75% of 2	1	1	1	1	1	1	1	1	1	1	1	1	1	75% of 0	1	1	1	1	1	1	1	1	1	1	1	1	75% of 0	1	1	1	1	1	1
AX-147253770	Araip.B06	128651353	0	1	1	1	1	1	1	1	1	1	75% of 0	1	1	1	1	1	1	1	1	1	1	1	1	1	75% of 2	1	1	1	1	1	1	1	1	1	1	1	1	75% of 2	1	1	1	1	1	1
AX-147226247	Araip.B06	128651804	0	1	1	1	1	1	1	1	1	1	75% of 0	1	1	1	1	1	1	1	1	1	1	1	1	1	75% of 2	1	1	1	1	1	1	1	1	1	1	1	1	75% of 2	1	1	1	1	1	1
AX-147226257	Araip.B06	129044651	0	2	1	1	1	1	1	1	1	1	75% of 0	1	1	1	1	1	1	1	1	1	1	1	1	1	75% of 2	1	1	1	1	1	1	1	1	1	1	1	1	75% of 2	1	1	1	1	1	1
AX-147253823	Araip.B06	129412979	0	2	1	1	1	1	1	1	1	1	75% of 0	1	1	1	1	1	1	1	1	1	1	1	1	1	75% of 2	1	1	1	1	1	1	1	1	1	1	1	1	75% of 2	1	1	1	1	1	1
AX-147226303	Araip.B06	129526826	2	0	1	1	1	1	1	1	1	1	75% of 2	1	1	1	1	1	1	1	1	1	1	1	1	1	75% of 0	1	1	1	1	1	1	1	1	1	1	1	1	75% of 0	1	1	1	1	1	1
AX-147226304	Araip.B06	129527275	0	2	1	1	1	1	0	1	1	1	1	1	1	1	1	1	1	1	1	1	1	1	1	1	75% of 2	1	1	1	1	1	1	1	1	1	1	1	1	1	1	1	1	1	1	1
AX-147253833	Araip.B06	129731047	0	2	1	1	1	1	1	1	1	1	75% of 2	1	1	1	1	1	1	1	1	1	1	1	1	1	75% of 2	1	1	1	1	1	1	1	1	1	1	1	1	75% of 2	1	1	1	1	1	1
AX-147226318	Araip.B06	129740694	2	1	1	1	1	1	1	1	1	1	75% of 0	1	1	1	1	1	1	1	1	1	1	1	1	1	75% of 0	1	75% of 0	1	1	1	1	1	1	1	1	75% of 2	1	1	1	1	1	1	1	1
AX-147226326	Araip.B06	129774700	2	0	1	1	1	1	1	1	1	1	75% of 0	1	1	1	1	1	1	1	1	1	1	1	1	1	75% of 0	1	75% of 0	1	1	1	1	1	1	1	1	75% of 2	1	1	1	1	1	1	1	1
AX-147226327	Araip.B06	129777379	2	0	1	1	1	1	1	1	1	1	75% of 0	1	1	1	1	1	1	1	1	1	1	1	1	1	75% of 0	1	1	1	1	1	1	1	1	1	1	1	1	1	1	1	1	1	1	1
AX-147226328	Araip.B06	129777716	2	0	1	1	1	1	1	1	1	1	75% of 0	1	1	1	1	1	1	1	1	1	1	1	1	1	75% of 0	1	1	1	1	1	1	1	1	1	1	1	1	1	1	1	1	1	1	1
AX-147226331	Araip.B06	129834919	2	0	1	1	1	1	1	1	1	1	75% of 0	1	1	1	1	1	1	1	1	1	1	1	1	75% of 2	75% of 0	1	75% of 0	1	1	1	1	1	1	1	1	75% of 2	1	1	1	1	1	1	1	1
AX-147253851	Araip.B06	130006774	0	2	1	1	1	1	1	1	1	1	75% of 2	1	1	1	1	1	1	1	1	1	1	1	1	1	75% of 2	1	1	1	1	1	1	1	1	1	1	1	1	75% of 2	1	1	1	1	1	1
AX-147226338	Araip.B06	130014446	2	0	1	1	1	1	1	1	1	1	75% of 0	1	1	1	1	1	1	1	1	1	1	1	1	1	75% of 0	1	1	1	1	1	1	1	1	1	1	75% of 2	1	1	1	1	1	1	1	1
AX-147226339	Araip.B06	130104485	2	0	1	1	1	1	1	1	1	1	75% of 0	1	1	1	1	1	1	1	1	1	1	1	1	1	75% of 0	1	1	1	1	1	1	1	1	1	1	75% of 2	1	75% of 0	1	1	1	1	1	1
AX-147253854	Araip.B06	130105005	2	0	1	1	1	1	1	1	1	1	75% of 0	1	1	1	1	1	1	1	1	1	1	1	1	1	75% of 0	1	75% of 2	1	1	1	1	1	1	1	1	75% of 2	1	75% of 0	1	1	1	1	1	1
AX-147253857	Araip.B06	130111041	2	0	1	1	1	1	2	1	1	1	75% of 0	1	1	1	1	1	1	1	1	1	1	1	1	1	75% of 0	1	1	1	1	1	1	1	1	1	1	75% of 2	1	1	1	1	1	1	1	1
AX-147253864	Araip.B06	130119409	2	0	1	1	1	1	1	1	1	1	75% of 0	1	1	1	1	1	1	1	1	1	1	1	1	1	75% of 0	1	1	1	1	1	1	1	1	1	1	75% of 2	1	75% of 0	1	1	1	1	1	1
AX-176791451	Araip.B06	130193512	0	2	1	1	1	1	1	1	1	1	75% of 2	1	1	1	1	1	1	1	1	1	1	1	1	1	NoCall	1	1	1	1	1	1	1	1	1	1	75% of 0	1	75% of 2	1	1	1	75% of 2	1	1
AX-147253872	Araip.B06	130193934	2	0	1	1	1	1	1	1	1	1	75% of 0	1	1	1	1	1	1	1	1	1	1	1	1	1	75% of 0	1	1	1	1	1	1	1	1	1	1	75% of 2	1	75% of 0	1	1	1	1	1	1
AX-147253881	Araip.B06	130303731	2	0	1	1	1	1	1	1	1	1	75% of 0	1	1	1	1	1	1	1	1	1	1	1	1	1	75% of 0	1	1	1	1	1	1	1	1	1	1	75% of 2	1	75% of 0	1	1	1	1	1	1
AX-147226357	Araip.B06	130486707	0	2	1	1	1	1	1	1	1	1	75% of 2	1	1	1	1	1	1	1	1	1	1	1	1	1	75% of 2	1	1	1	1	1	1	1	1	1	1	75% of 0	1	75% of 2	1	1	1	1	1	1
AX-147253898	Araip.B06	130661059	0	2	1	1	1	1	1	1	1	1	75% of 2	1	1	1	1	1	1	1	1	1	1	1	1	1	75% of 2	1	1	1	1	1	1	1	1	1	1	75% of 0	1	75% of 2	1	1	1	1	1	1
AX-147253908	Araip.B06	130925320	2	0	1	1	1	1	1	1	1	1	75% of 0	1	1	1	1	1	1	1	1	1	1	1	1	1	75% of 0	1	1	1	1	1	1	1	1	1	1	75% of 2	1	75% of 0	1	1	1	1	1	1
AX-147253909	Araip.B06	130927482	2	0	1	1	1	1	1	1	1	1	75% of 0	1	1	1	1	1	1	1	1	1	1	1	1	1	75% of 0	1	1	1	1	1	1	1	1	1	1	75% of 2	1	75% of 0	1	1	1	1	1	1
AX-147226374	Araip.B06	131003165	2	0	1	1	1	1	1	1	1	1	75% of 0	1	1	1	1	1	1	1	1	1	1	1	1	1	75% of 0	1	1	1	1	1	1	1	1	1	1	75% of 2	1	75% of 0	1	1	1	1	1	1
AX-147253920	Araip.B06	131090850	2	0	1	1	1	1	1	1	1	1	75% of 0	1	1	1	1	1	1	1	1	1	1	1	1	1	75% of 0	1	1	1	1	1	1	1	1	1	1	75% of 2	1	75% of 0	1	1	1	1	1	1
AX-147253921	Araip.B06	131092759	0	2	1	1	1	1	0	1	1	1	75% of 2	1	1	1	1	1	1	1	1	1	1	1	1	1	75% of 2	1	1	1	1	1	1	1	1	1	1	75% of 0	1	75% of 2	1	1	1	1	1	1
AX-147253922	Araip.B06	131095006	0	2	1	1	1	1	1	1	1	1	75% of 2	1	1	1	1	1	1	1	1	1	1	1	1	1	75% of 2	1	1	1	1	1	1	1	1	1	1	75% of 0	1	75% of 2	1	1	1	1	1	1
AX-147226395	Araip.B06	131190827	2	0	1	1	1	1	1	1	1	1	75% of 0	1	1	1	1	1	1	1	1	1	1	1	1	1	75% of 0	1	1	1	1	1	1	1	1	1	1	75% of 2	1	75% of 0	1	1	1	1	1	1
AX-147253926	Araip.B06	131216671	0	2	1	1	1	1	1	1	1	1	75% of 2	1	1	1	1	1	1	1	1	1	1	1	1	1	75% of 2	1	1	1	1	1	1	1	1	1	1	75% of 0	1	75% of 2	1	1	1	1	1	1
AX-147253929	Araip.B06	131268098	0	2	1	1	1	1	1	1	1	1	75% of 2	1	1	1	1	1	1	1	1	1	1	1	1	1	75% of 2	1	1	1	1	1	1	1	1	1	1	75% of 0	1	75% of 2	1	1	1	1	1	1
AX-147253930	Araip.B06	131349587	0	2	1	1	1	1	1	1	1	1	75% of 2	1	1	1	1	1	1	1	1	1	1	1	1	1	75% of 2	1	1	1	1	1	1	1	1	1	1	75% of 0	1	75% of 2	1	1	1	1	1	1
AX-147253943	Araip.B06	131651200	2	0	1	1	1	1	1	1	1	1	75% of 0	1	1	1	1	1	1	1	1	1	1	1	1	1	75% of 0	1	1	1	1	1	1	1	1	1	1	75% of 2	1	75% of 0	1	1	1	1	1	1
AX-147226461	Araip.B06	131954740	0	2	1	1	1	1	1	1	1	1	75% of 2	1	1	1	1	1	1	1	1	1	1	1	1	1	75% of 2	1	1	1	1	1	1	1	1	1	1	75% of 0	1	75% of 2	1	1	1	1	1	1
AX-147226465	Araip.B06	132018996	2	0	1	1	1	1	1	1	1	1	75% of 0	1	1	1	1	1	1	1	1	1	1	1	1	1	75% of 0	1	1	1	1	1	1	1	1	1	1	75% of 2	1	75% of 0	1	1	1	1	1	1
AX-176791827	Araip.B06	132025911	0	2	1	1	1	1	1	1	1	1	75% of 2	1	1	1	1	1	1	1	1	1	1	1	1	1	1	1	1	1	1	1	1	1	1	1	1	75% of 0	1	1	1	1	1	1	1	1
AX-147226479	Araip.B06	132150692	2	0	1	1	1	1	1	1	1	1	75% of 0	1	1	1	1	1	1	1	1	1	1	1	1	1	75% of 0	1	1	1	1	1	1	1	1	1	1	75% of 2	1	75% of 0	1	1	1	1	1	1
AX-147253979	Araip.B06	132190034	0	2	1	1	1	1	1	1	1	1	75% of 2	1	1	1	1	1	1	1	1	1	1	1	1	1	75% of 2	1	1	1	1	1	1	1	1	1	1	75% of 0	1	75% of 2	1	1	1	1	1	1
AX-147226488	Araip.B06	132322482	2	0	1	1	1	1	1	1	1	1	75% of 0	1	1	1	1	1	1	1	1	1	1	1	1	1	75% of 0	1	1	1	1	1	1	1	1	1	1	75% of 2	1	75% of 0	1	1	1	1	1	1
AX-147226489	Araip.B06	132323380	0	2	1	1	1	1	1	1	1	1	75% of 2	1	1	1	1	1	1	1	1	1	1	1	1	1	75% of 2	1	1	1	1	1	1	1	1	1	1	75% of 0	1	75% of 2	1	1	1	1	1	1
AX-147226490	Araip.B06	132325896	2	0	1	1	1	1	1	1	1	1	75% of 0	1	1	1	1	1	1	1	1	1	1	1	1	1	75% of 0	1	1	1	1	1	1	1	1	1	1	75% of 2	1	75% of 0	1	1	1	1	1	1
AX-147226491	Araip.B06	132332180	2	0	1	1	1	1	1	1	1	1	75% of 0	1	1	1	1	1	1	1	1	1	1	1	1	1	75% of 0	1	1	1	1	1	1	1	1	1	1	75% of 2	1	75% of 0	1	1	1	1	1	1
AX-147226493	Araip.B06	132336081	2	0	1	1	1	1	1	1	1	1	75% of 0	1	1	1	1	1	1	1	1	1	1	1	1	1	75% of 0	1	1	1	1	1	1	1	1	1	1	75% of 2	1	75% of 0	1	1	1	1	1	1
AX-147226494	Araip.B06	132344790	0	2	1	1	1	1	1	1	1	1	75% of 2	1	1	1	1	1	1	1	1	1	1	1	1	1	75% of 2	1	1	1	1	1	1	1	1	1	1	75% of 0	1	75% of 2	1	1	1	1	1	1
AX-147253994	Araip.B06	132354634	0	2	1	1	1	1	1	1	1	1	75% of 2	1	1	1	1	1	1	1	1	1	1	1	1	1	75% of 2	1	1	1	1	1	1	1	1	1	1	75% of 0	1	75% of 2	1	1	1	1	1	1
AX-147253998	Araip.B06	132403515	2	0	1	1	1	1	1	1	1	1	75% of 0	1	1	1	1	1	1	1	1	1	1	1	1	1	75% of 0	1	1	1	1	1	1	1	1	1	1	75% of 2	1	75% of 0	1	1	1	1	1	1
AX-147254015	Araip.B06	132895179	0	2	1	1	1	1	1	1	1	1	75% of 2	1	1	1	1	1	1	1	1	1	1	1	1	1	75% of 2	1	1	1	1	1	1	1	1	1	1	75% of 0	1	75% of 2	1	1	1	1	1	1
AX-147226515	Araip.B06	132923169	0	1	1	NoCall	1	1	0	1	1	1	2	1	1	1	1	1	1	1	1	1	1	1	1	1	2	1	1	1	1	1	1	1	1	1	1	1	1	1	1	1	1	1	1	1
AX-147226518	Araip.B06	132932125	2	0	1	1	1	1	1	1	1	1	75% of 0	1	1	1	1	75% of 0	1	1	1	1	1	1	1	1	75% of 0	1	1	1	1	1	1	1	1	1	1	75% of 2	1	75% of 0	1	1	1	1	1	1
AX-147226520	Araip.B06	132935333	0	2	1	1	1	1	1	1	1	1	75% of 2	1	1	1	1	1	1	1	1	1	1	1	1	1	75% of 2	1	1	1	1	1	1	1	1	1	1	75% of 0	1	75% of 2	1	1	1	1	1	1
AX-147254019	Araip.B06	132936712	2	0	1	1	1	1	1	1	1	1	75% of 0	1	1	1	1	1	1	1	1	1	1	1	1	1	75% of 0	1	1	1	1	1	1	1	1	1	1	75% of 2	1	75% of 0	1	1	1	1	1	1
AX-147254023	Araip.B06	132979060	2	0	1	1	1	1	1	1	1	1	75% of 0	1	1	75% of 2	1	1	1	1	1	1	1	1	1	1	75% of 0	1	1	1	1	1	1	1	1	1	1	75% of 2	1	75% of 0	1	1	1	1	1	1
AX-147226535	Araip.B06	133139671	0	1	1	1	1	1	1	1	1	1	75% of 2	1	1	1	1	1	1	1	1	1	1	1	1	1	75% of 2	1	1	1	1	1	1	1	1	1	1	75% of 0	1	75% of 2	1	1	1	1	1	1
AX-147254033	Araip.B06	133200003	2	0	1	1	1	1	1	1	1	1	75% of 0	1	1	1	1	1	1	1	1	1	1	1	1	1	75% of 0	1	1	1	1	1	1	1	1	1	1	75% of 2	1	75% of 0	1	1	1	1	1	1
AX-147254037	Araip.B06	133271301	2	0	1	1	1	1	1	1	1	1	75% of 0	1	1	1	1	1	1	1	1	1	1	1	1	1	75% of 0	1	1	1	1	1	1	1	1	1	1	75% of 2	1	75% of 0	NoCall	1	1	1	1	1
AX-147254038	Araip.B06	133286186	0	2	1	1	1	1	1	1	1	1	75% of 2	1	1	1	1	1	1	1	1	1	1	1	1	1	75% of 2	1	1	1	1	1	1	1	1	1	1	0	1	75% of 2	1	1	1	1	1	1
AX-147254045	Araip.B06	133354363	2	0	1	1	1	1	1	1	1	1	75% of 0	1	1	1	1	1	1	1	1	1	1	1	1	1	75% of 0	1	75% of 2	1	1	1	1	1	1	1	1	75% of 2	1	75% of 0	1	1	1	1	1	1
AX-147254049	Araip.B06	133374826	0	1	1	1	1	1	1	1	1	1	75% of 2	1	1	1	1	1	1	1	1	1	1	1	1	1	75% of 2	1	75% of 0	1	1	1	1	1	1	1	1	75% of 0	1	75% of 2	1	1	1	1	1	1
AX-147226557	Araip.B06	133374943	2	0	1	1	1	1	1	1	1	1	75% of 0	1	1	1	75% of 2	75% of 0	1	1	1	1	1	1	1	1	75% of 0	1	1	1	1	1	1	1	1	1	1	1	1	75% of 0	1	1	1	1	1	1
AX-147226558	Araip.B06	133380533	2	0	1	1	1	1	1	1	1	1	75% of 0	1	1	1	1	1	1	1	1	1	1	1	1	1	75% of 0	1	1	1	1	1	1	1	1	1	1	75% of 2	1	75% of 0	1	1	1	1	1	1
AX-147226564	Araip.B06	133387321	0	2	1	1	1	1	1	1	1	1	75% of 2	1	1	1	1	1	1	1	1	1	1	1	1	1	75% of 2	1	1	1	1	1	1	1	1	1	1	75% of 0	1	75% of 2	1	1	1	1	1	1
AX-147254053	Araip.B06	133417829	0	2	1	1	1	1	1	1	1	1	75% of 2	1	1	1	1	1	1	1	1	1	1	1	1	1	75% of 2	1	75% of 0	1	1	1	1	1	1	1	1	75% of 0	1	75% of 2	1	1	1	1	1	1
AX-147254062	Araip.B06	133505937	0	2	1	1	1	1	1	1	1	1	75% of 2	1	1	1	1	1	1	1	1	1	1	1	1	1	1	1	1	1	1	1	1	1	1	1	1	75% of 0	1	1	1	75% of 2	1	75% of 2	1	1
AX-147254078	Araip.B06	133603217	0	2	1	1	1	1	1	1	1	1	75% of 2	1	1	75% of 2	75% of 2	1	1	1	1	1	1	1	1	1	1	1	1	1	1	1	1	1	1	1	1	75% of 0	1	1	1	1	1	1	1	1
AX-147254088	Araip.B06	133665390	2	1	1	1	1	1	1	1	1	1	75% of 0	1	1	1	1	1	1	75% of 0	75% of 2	1	1	1	1	1	75% of 0	1	1	1	1	1	1	1	1	1	1	1	1	75% of 0	1	1	1	75% of 0	1	1
AX-147224727	Araip.B06	133735534	2	0	1	1	1	1	1	1	1	1	1	1	1	1	1	1	1	1	75% of 2	1	1	1	1	1	1	1	1	1	1	1	1	1	1	1	1	1	1	1	1	1	1	1	1	1
AX-147254105	Araip.B06	133744896	0	2	1	1	1	1	1	1	1	1	1	1	1	1	1	1	1	1	75% of 2	1	1	1	1	1	1	1	1	1	1	1	1	1	1	1	1	1	1	1	1	1	1	1	1	1
AX-147254111	Araip.B06	133781111	2	0	1	1	1	1	1	1	1	1	75% of 0	1	1	1	1	1	1	1	1	1	1	1	1	1	75% of 0	1	1	1	1	1	1	1	1	1	1	75% of 2	1	75% of 0	1	1	1	75% of 0	1	1
AX-147226579	Araip.B06	133793627	2	0	1	1	1	1	1	1	1	1	1	1	1	1	1	1	1	1	1	1	1	1	1	1	75% of 0	1	1	1	1	1	1	1	1	1	1	75% of 2	1	1	1	1	1	1	1	1
AX-147226582	Araip.B06	133826329	0	2	1	1	1	1	1	1	1	1	75% of 2	1	1	1	1	1	1	1	1	1	1	1	1	1	75% of 2	1	1	1	1	1	1	1	1	1	1	75% of 0	1	75% of 2	1	1	1	75% of 2	1	1
AX-147226584	Araip.B06	133826884	2	0	1	1	1	1	1	1	1	1	75% of 0	1	1	1	1	1	1	1	1	1	1	1	1	1	75% of 0	1	1	1	1	1	1	1	1	1	1	75% of 2	1	75% of 0	1	1	1	75% of 0	1	1
AX-147254129	Araip.B06	133927085	2	0	1	1	1	1	1	1	1	1	75% of 0	1	1	1	1	1	1	1	1	1	1	1	1	1	75% of 0	1	75% of 2	1	1	1	1	1	1	1	1	75% of 2	1	75% of 0	1	1	1	75% of 0	1	1
AX-147254130	Araip.B06	133933009	2	0	1	1	1	1	1	1	1	1	75% of 0	1	1	1	1	1	1	1	1	1	1	1	1	1	75% of 0	1	75% of 2	1	1	1	1	1	1	1	1	75% of 2	1	75% of 0	1	1	1	75% of 0	1	1
AX-147226595	Araip.B06	134103247	0	2	1	1	1	1	1	1	1	1	75% of 2	1	1	1	1	1	1	1	1	1	1	1	1	1	75% of 2	1	1	1	1	1	1	1	1	1	1	75% of 0	1	75% of 2	1	1	1	75% of 2	1	1
AX-147226600	Araip.B06	134109310	2	0	1	1	1	1	1	1	1	1	75% of 0	1	1	1	1	1	1	1	1	1	1	1	1	1	75% of 0	1	1	1	1	1	1	1	1	1	1	75% of 2	1	75% of 0	1	1	1	75% of 0	1	1
AX-147254146	Araip.B06	134116937	2	0	1	1	1	1	1	1	1	1	75% of 0	1	1	1	1	1	1	1	1	1	1	1	1	1	75% of 0	1	75% of 2	1	1	1	1	1	1	1	1	2	1	75% of 0	1	1	1	75% of 0	1	1
AX-147254150	Araip.B06	134135358	0	2	1	1	1	1	1	1	1	1	75% of 2	1	1	1	1	1	1	1	1	1	1	1	1	1	75% of 2	1	1	1	1	1	1	1	1	1	1	75% of 0	1	75% of 2	1	1	1	75% of 2	1	1
AX-147254167	Araip.B06	134446146	2	0	1	1	1	1	1	1	1	1	75% of 0	1	1	1	1	1	1	1	1	1	1	1	1	1	75% of 0	1	1	1	1	1	1	1	1	1	1	75% of 2	1	75% of 0	1	1	1	75% of 0	1	1
AX-147226618	Araip.B06	134519804	0	2	1	1	1	1	1	1	1	1	75% of 2	1	1	1	1	1	1	1	1	1	1	1	1	75% of 2	75% of 2	1	1	1	1	1	1	1	1	1	1	75% of 0	1	75% of 2	1	1	1	75% of 2	1	1
AX-147254174	Araip.B06	134700961	0	2	1	1	1	1	1	1	1	1	75% of 2	1	1	1	1	1	1	1	1	1	1	1	1	1	1	1	1	1	1	1	1	1	1	1	1	75% of 0	1	75% of 2	1	1	1	75% of 2	1	1
AX-147254175	Araip.B06	134703663	2	0	1	1	1	1	1	1	1	1	75% of 0	1	1	1	1	1	1	1	1	1	1	1	1	1	1	1	1	1	1	1	1	1	1	1	1	75% of 2	1	75% of 0	1	1	1	75% of 0	1	1
AX-147226642	Araip.B06	134778386	2	0	1	1	1	1	1	1	1	1	75% of 0	1	1	1	1	1	1	1	1	1	1	1	1	1	1	1	1	1	1	1	1	1	1	1	1	75% of 2	1	75% of 0	1	1	1	75% of 0	1	1
AX-147226646	Araip.B06	134788919	0	2	1	1	1	1	1	1	1	1	75% of 2	1	1	1	1	1	1	1	1	1	1	1	1	1	1	1	1	1	1	1	1	1	1	1	1	75% of 0	1	75% of 2	1	1	1	75% of 2	1	1
AX-147226654	Araip.B06	134848368	2	0	1	1	1	1	1	1	1	1	75% of 0	1	1	1	1	1	1	1	1	1	1	1	1	1	1	1	1	1	1	1	1	1	1	1	1	75% of 2	1	75% of 0	1	1	1	75% of 0	1	1
AX-147226655	Araip.B06	134873462	0	2	1	1	1	1	1	1	1	1	75% of 2	1	1	1	1	1	1	1	1	1	1	1	1	1	1	1	1	1	1	1	1	1	1	1	1	75% of 0	1	75% of 2	1	1	1	75% of 2	1	1
AX-147254184	Araip.B06	134883899	0	2	1	1	1	1	1	1	1	1	75% of 2	1	1	1	1	1	1	1	1	1	1	1	1	1	1	1	1	1	1	1	1	1	1	1	1	75% of 0	1	75% of 2	1	1	1	75% of 2	1	1
AX-147226659	Araip.B06	134925409	2	0	1	1	1	1	1	1	1	1	75% of 0	1	1	1	1	1	1	1	1	1	1	1	1	1	1	1	1	1	1	1	1	1	1	1	1	75% of 2	1	75% of 0	1	1	1	75% of 0	1	1
AX-147226660	Araip.B06	134925592	0	2	1	1	1	1	1	1	1	1	75% of 2	1	1	1	1	1	1	1	1	1	1	1	1	1	1	1	1	1	1	1	1	1	1	1	1	75% of 0	1	75% of 2	1	1	1	75% of 2	1	1
AX-147226662	Araip.B06	135001191	0	2	1	1	1	1	1	1	1	1	75% of 2	1	1	1	1	1	1	1	1	1	1	1	1	1	1	1	1	1	1	1	1	1	1	1	1	75% of 0	1	75% of 2	1	1	1	75% of 2	1	1
AX-147226666	Araip.B06	135004419	2	0	1	1	1	1	1	1	1	1	75% of 0	1	1	1	1	1	1	1	1	1	1	1	1	1	1	1	1	1	1	1	1	1	1	1	1	75% of 2	1	75% of 0	1	1	1	75% of 0	1	1
AX-147254193	Araip.B06	135018816	2	0	1	1	1	1	1	1	1	1	75% of 0	1	1	1	1	1	1	1	1	1	1	1	1	1	1	1	1	1	1	1	1	1	1	1	1	75% of 2	1	75% of 0	1	1	1	75% of 0	1	1
AX-147254196	Araip.B06	135069925	2	0	1	1	1	1	1	1	1	1	75% of 0	1	1	1	1	1	1	1	1	1	1	1	1	1	1	1	1	1	1	1	1	1	1	1	1	75% of 2	1	75% of 0	1	1	1	75% of 0	1	1
AX-147254200	Araip.B06	135104032	0	2	1	1	1	1	1	1	1	1	75% of 2	1	1	1	1	1	1	1	1	1	1	1	1	1	1	1	1	1	1	1	1	1	1	1	1	75% of 0	1	75% of 2	1	1	1	75% of 2	1	1
AX-147226676	Araip.B06	135116846	0	2	1	1	1	1	1	1	1	1	75% of 2	1	1	1	1	1	1	1	1	1	1	1	1	1	1	1	1	1	1	1	1	1	1	1	1	1	1	75% of 2	1	1	1	75% of 2	1	1
AX-147226687	Araip.B06	135319266	2	0	1	1	1	1	1	1	1	1	1	1	1	1	1	1	1	1	1	1	1	1	1	2	1	1	1	1	1	1	1	1	1	1	1	75% of 2	1	1	1	NoCall	1	1	1	1
AX-147226690	Araip.B06	135399067	0	2	1	1	1	1	1	1	1	1	75% of 2	1	1	1	1	1	1	1	1	1	1	1	1	1	1	1	1	1	1	1	1	1	1	1	1	75% of 0	1	75% of 2	1	1	1	75% of 2	1	1
AX-147226692	Araip.B06	135401073	2	0	1	1	1	1	1	1	1	1	75% of 0	1	1	1	1	1	1	1	1	1	1	1	1	1	1	1	1	1	1	1	1	1	1	1	1	75% of 2	1	75% of 0	1	1	1	75% of 0	1	1
AX-147226694	Araip.B06	135403759	2	0	1	1	1	1	1	1	1	1	75% of 0	1	1	1	1	1	1	1	1	1	1	1	1	1	1	1	1	1	1	1	1	1	1	1	1	75% of 2	1	75% of 0	1	1	1	75% of 0	1	1
AX-147254231	Araip.B06	135639285	0	2	1	1	1	1	1	1	1	1	75% of 2	1	1	1	1	1	1	1	1	1	1	1	1	1	1	1	1	1	1	1	1	1	1	1	1	75% of 0	1	75% of 2	1	1	1	75% of 2	1	1
AX-176806467	Araip.B06	135831090	0	2	NoCall	NoCall	1	1	1	1	1	1	1	1	1	1	1	1	1	1	1	1	1	1	1	1	1	1	1	1	1	1	1	1	1	1	1	0	1	2	1	1	1	2	1	1
AX-147254333	Araip.B07	686538	0	2	1	1	1	75% of 0	1	1	75% of 0	1	1	1	1	1	1	1	1	1	75% of 0	1	75% of 0	75% of 0	1	75% of 0	1	1	1	1	1	75% of 0	1	1	1	1	1	1	75% of 2	1	1	1	1	1	1	1
AX-147254340	Araip.B07	763999	2	0	1	1	1	75% of 2	1	1	75% of 2	1	1	1	75% of 2	1	1	1	1	1	75% of 2	1	75% of 2	75% of 2	1	75% of 2	1	1	1	1	1	75% of 2	1	1	1	1	1	1	75% of 0	1	1	1	1	1	1	1
AX-147254342	Araip.B07	807438	2	0	1	1	1	75% of 2	1	1	75% of 2	1	1	1	75% of 2	1	1	1	1	1	75% of 2	1	75% of 2	75% of 2	1	75% of 2	1	1	1	1	1	75% of 2	1	1	1	1	1	1	75% of 0	1	1	1	1	1	1	1
AX-147254362	Araip.B07	1029451	2	0	1	1	1	75% of 2	1	1	75% of 2	1	1	1	75% of 2	1	1	1	1	1	75% of 2	1	75% of 2	75% of 2	1	75% of 2	1	1	1	1	1	75% of 2	1	1	1	1	1	1	75% of 0	1	1	1	1	1	1	1
AX-147254382	Araip.B07	1263763	2	0	1	1	1	75% of 2	1	1	75% of 2	1	1	1	1	1	1	1	1	1	75% of 2	1	75% of 2	75% of 2	1	75% of 2	1	1	1	1	1	75% of 2	1	1	1	1	1	1	75% of 0	1	1	1	1	1	1	1
AX-147226975	Araip.B07	1299906	2	0	1	1	1	75% of 2	1	1	75% of 2	1	1	1	1	1	1	1	1	1	75% of 2	1	75% of 2	75% of 2	1	75% of 2	1	1	1	1	1	75% of 2	1	1	1	1	1	1	75% of 0	1	1	1	1	1	1	1
AX-147226982	Araip.B07	1372824	2	0	1	1	1	75% of 2	1	1	75% of 2	1	1	1	1	1	1	1	1	1	75% of 2	1	75% of 2	75% of 2	1	75% of 2	1	1	1	1	1	75% of 2	1	1	1	1	1	1	75% of 0	1	1	1	1	1	1	1
AX-147226985	Araip.B07	1394692	2	0	1	1	1	75% of 2	1	1	75% of 2	1	1	1	1	1	1	1	1	1	75% of 2	1	75% of 2	75% of 2	1	75% of 2	1	1	1	1	1	75% of 2	1	1	1	1	1	1	75% of 0	1	1	1	1	1	1	1
AX-147254450	Araip.B07	1924101	0	2	1	1	1	75% of 0	1	1	75% of 2	1	1	1	1	1	1	1	1	1	75% of 2	1	75% of 2	75% of 2	1	75% of 2	1	1	1	1	1	75% of 2	1	1	1	1	1	1	1	1	1	1	1	1	1	1
AX-147227036	Araip.B07	1980923	2	0	1	1	1	75% of 2	1	1	75% of 2	1	1	1	1	1	1	1	1	1	75% of 2	1	75% of 2	75% of 2	1	75% of 2	1	1	1	1	1	75% of 2	1	1	1	1	1	1	1	1	1	1	1	1	1	1
AX-147254479	Araip.B07	2069679	2	0	1	1	1	75% of 2	1	1	75% of 2	1	1	1	1	1	1	1	1	1	75% of 2	1	75% of 2	75% of 2	1	75% of 2	1	1	1	1	1	75% of 2	1	1	1	1	1	1	1	1	1	1	1	1	1	1
AX-147227068	Araip.B07	2072221	0	2	1	1	1	75% of 0	1	1	75% of 0	1	1	1	1	1	1	1	1	1	75% of 0	1	75% of 0	75% of 0	1	75% of 0	1	1	1	1	1	75% of 0	1	1	1	1	1	1	1	1	1	1	1	1	1	1
AX-147254480	Araip.B07	2077018	2	0	1	1	1	75% of 2	1	1	75% of 2	1	1	1	1	1	1	1	1	1	75% of 2	1	75% of 2	75% of 2	1	75% of 2	1	1	1	1	1	75% of 2	1	1	1	1	1	1	1	1	1	1	1	1	1	1
AX-147227090	Araip.B07	2276988	0	2	1	1	1	1	1	1	1	1	1	1	1	1	1	1	1	1	1	1	1	1	1	1	1	1	1	1	1	1	1	75% of 2	1	1	1	1	1	1	1	1	1	1	1	1
AX-147227095	Araip.B07	2514457	0	2	1	1	1	1	1	1	75% of 0	1	1	1	1	1	1	1	1	1	1	1	1	1	1	1	1	1	1	1	1	1	1	75% of 2	1	1	1	1	1	1	1	1	1	1	1	1
AX-147227194	Araip.B07	2589413	0	2	NoCall	NoCall	1	1	1	1	75% of 0	1	1	1	1	1	1	1	1	1	1	1	1	1	1	1	1	1	1	1	1	1	1	75% of 2	1	1	1	1	1	1	1	1	1	1	1	1
AX-147254547	Araip.B07	2906101	0	2	1	1	1	1	1	1	75% of 0	1	1	1	1	1	1	1	1	1	1	1	1	1	1	1	1	1	1	1	1	1	1	75% of 2	1	1	1	1	1	1	1	1	1	1	1	1
AX-147227134	Araip.B07	2912562	0	2	1	1	1	1	1	1	75% of 0	1	1	1	1	1	1	1	1	1	1	1	1	1	1	1	1	1	1	1	1	1	1	75% of 2	1	1	1	1	1	1	1	1	1	1	1	1
AX-147227150	Araip.B07	3085620	0	2	1	1	1	1	1	1	75% of 0	1	1	1	1	1	1	1	1	1	1	1	1	1	1	1	1	1	1	1	1	1	1	75% of 2	1	1	1	1	1	1	1	1	1	1	1	1
AX-147227223	Araip.B07	3479149	2	0	1	1	1	1	1	1	75% of 2	1	1	1	1	1	1	1	1	1	1	1	1	1	1	1	1	1	1	1	1	1	1	75% of 0	1	1	1	1	1	1	1	1	1	1	1	1
AX-147227226	Araip.B07	3485947	2	0	1	1	1	1	1	1	75% of 2	1	1	1	1	1	1	1	1	1	1	1	1	1	1	1	1	1	1	1	1	1	1	75% of 0	1	1	1	1	1	1	1	1	1	1	1	1
AX-147254606	Araip.B07	3529563	0	2	1	1	1	1	1	1	75% of 0	1	1	1	1	1	1	1	1	1	1	1	1	1	1	1	1	1	1	1	1	1	1	75% of 2	1	1	1	1	1	1	1	1	1	1	1	1
AX-147227234	Araip.B07	3611413	0	2	1	1	1	1	1	1	75% of 0	1	1	1	1	1	1	1	1	1	1	1	1	1	1	1	1	1	1	1	1	1	1	75% of 2	1	1	1	1	1	1	1	1	1	1	1	1
AX-147254613	Araip.B07	3645466	2	0	1	1	1	1	1	1	75% of 2	1	1	1	1	1	1	1	1	1	1	1	1	1	1	1	1	1	1	1	1	1	1	75% of 0	1	1	1	1	1	1	1	1	1	1	1	1
AX-176791737	Araip.B07	3672837	2	0	1	1	1	1	1	1	75% of 2	1	1	1	1	1	1	1	1	1	1	1	1	1	1	1	1	1	1	1	1	1	1	75% of 0	1	1	1	1	1	1	1	1	1	1	1	1
AX-147227249	Araip.B07	3822697	0	2	1	1	1	1	1	1	75% of 0	1	1	1	1	1	1	1	1	1	1	1	1	1	1	1	1	1	1	1	1	1	1	75% of 2	1	1	1	1	1	1	1	1	1	1	1	1
AX-147254632	Araip.B07	3837531	0	2	1	1	1	1	1	1	75% of 0	1	1	1	1	1	1	1	1	1	1	1	1	1	1	1	1	1	1	1	1	1	1	75% of 2	1	1	1	1	1	1	1	1	1	1	1	1
AX-176791538	Araip.B07	3900419	0	2	1	1	1	1	1	1	75% of 0	1	1	1	1	1	1	1	1	1	1	1	1	1	1	1	1	1	1	1	1	1	1	75% of 2	1	1	1	1	1	1	1	1	1	1	1	1
AX-147254646	Araip.B07	4083038	0	2	1	1	1	1	1	1	75% of 0	1	1	1	1	1	1	1	1	1	1	1	1	1	1	1	1	1	1	1	1	1	1	75% of 2	1	1	1	1	1	1	1	1	1	1	1	1
AX-147254650	Araip.B07	4115395	0	2	1	1	1	1	1	1	75% of 0	1	1	1	1	1	1	1	1	1	1	1	1	1	1	1	1	1	1	1	1	1	1	75% of 2	1	1	1	1	1	1	1	1	1	1	1	1
AX-147227274	Araip.B07	4212446	2	0	1	1	1	1	1	1	75% of 2	1	1	1	1	1	1	1	1	1	1	1	1	1	1	1	1	1	1	1	1	1	1	75% of 0	1	1	1	1	1	1	1	1	1	1	1	1
AX-147254668	Araip.B07	4301595	0	2	1	1	1	1	1	1	75% of 0	1	1	1	1	1	1	1	1	1	1	1	1	1	1	1	1	1	1	1	1	1	1	75% of 2	1	1	1	1	1	1	1	1	1	1	1	1
AX-147227295	Araip.B07	4329902	2	0	1	1	1	1	1	1	75% of 2	1	1	1	1	1	1	1	1	1	1	1	1	1	1	1	1	1	1	1	1	1	1	75% of 0	1	1	1	1	1	1	1	1	1	1	1	1
AX-147227296	Araip.B07	4330317	0	2	1	1	1	1	1	1	75% of 0	1	1	1	1	1	1	1	1	1	1	1	1	1	1	1	1	1	1	1	1	1	1	75% of 2	1	1	1	1	1	1	1	1	1	1	1	1
AX-147254687	Araip.B07	4376216	0	2	1	1	1	1	1	1	75% of 0	1	1	1	1	1	1	1	1	1	1	1	1	1	1	1	1	1	1	1	1	1	1	75% of 2	1	1	1	1	1	1	1	1	1	1	1	1
AX-147254693	Araip.B07	4416916	2	0	1	1	1	1	1	1	75% of 2	1	1	1	1	1	1	1	1	1	1	1	1	1	1	1	1	1	1	1	1	1	1	75% of 0	1	1	1	1	1	1	1	1	1	1	1	1
AX-147254700	Araip.B07	4476266	0	2	1	1	1	1	1	1	75% of 0	1	1	1	1	1	1	1	1	1	1	1	1	1	1	1	1	1	1	1	1	1	1	75% of 2	1	1	1	1	1	1	1	1	1	1	1	1
AX-147227322	Araip.B07	4476507	0	2	1	1	1	1	1	1	75% of 0	1	1	1	1	1	1	1	1	1	1	1	1	1	1	1	1	1	1	1	1	1	1	75% of 2	1	1	1	1	1	1	1	1	1	1	1	1
AX-147227323	Araip.B07	4495123	0	2	1	1	1	1	1	1	75% of 0	1	1	1	1	1	1	1	1	1	1	1	1	1	1	1	1	1	1	1	1	1	1	75% of 2	1	1	1	1	1	1	1	1	1	1	1	1
AX-147227414	Araip.B07	5166225	2	0	1	1	1	1	1	1	75% of 2	1	1	1	1	1	1	1	1	1	1	1	1	1	1	1	1	1	1	1	1	1	1	75% of 0	1	1	1	1	1	1	1	1	1	1	1	1
AX-147254746	Araip.B07	5460822	0	2	1	1	1	1	1	1	75% of 0	1	1	1	1	1	1	1	1	1	1	1	1	1	1	1	1	1	1	1	1	1	1	75% of 2	1	1	1	1	1	1	1	1	1	1	1	1
AX-147227434	Araip.B07	5579063	0	2	1	1	1	1	1	1	75% of 0	1	1	1	1	1	1	1	1	1	1	1	1	1	1	1	1	1	1	1	1	1	1	75% of 2	1	1	1	1	1	1	1	1	1	1	1	1
AX-147254897	Araip.B07	8703840	0	2	1	1	1	1	1	1	1	1	1	1	1	1	1	1	1	1	75% of 2	1	1	1	1	1	1	1	1	1	1	1	1	75% of 2	1	1	1	1	1	1	1	1	1	1	1	1
AX-147227618	Araip.B07	9014151	2	0	1	1	1	1	1	1	1	1	1	1	1	1	1	1	1	1	1	1	1	1	1	75% of 0	1	1	1	1	1	1	1	75% of 0	1	1	1	1	1	1	1	1	1	1	1	1
AX-147254914	Araip.B07	9117081	2	0	1	1	1	1	1	1	1	1	1	1	1	1	1	1	1	1	1	1	1	1	1	1	1	1	1	1	1	1	1	75% of 0	1	1	1	1	1	1	1	1	1	1	1	1
AX-147254921	Araip.B07	9349693	0	2	1	1	1	1	1	1	1	1	1	1	1	1	1	1	1	1	1	1	1	1	1	1	1	1	1	1	1	1	1	75% of 2	1	1	1	1	1	1	1	1	1	1	1	1
AX-147227632	Araip.B07	9354347	0	2	1	1	1	1	1	1	1	1	1	1	1	1	1	1	1	1	1	1	1	1	1	1	1	1	1	1	1	1	1	75% of 2	1	1	1	1	1	1	1	1	1	1	1	1
AX-147227638	Araip.B07	9468252	0	2	1	1	1	1	1	1	1	1	1	1	1	1	1	1	1	1	1	1	1	1	1	1	1	1	1	1	1	1	1	75% of 2	1	1	1	1	1	1	1	1	1	1	1	1
AX-147254929	Araip.B07	9468323	0	2	1	1	1	1	1	1	1	1	1	1	1	1	1	1	1	1	1	1	1	1	1	1	1	1	1	1	1	1	1	75% of 2	1	1	1	1	1	1	1	1	1	1	1	1
AX-176791522	Araip.B07	9602219	2	0	1	1	1	1	1	1	1	1	1	1	1	1	1	1	1	1	1	1	1	1	1	1	1	1	1	1	1	1	1	75% of 0	1	1	1	1	1	1	1	1	1	1	1	1
AX-147227684	Araip.B07	10837391	2	0	1	1	1	1	1	1	1	1	1	1	1	1	1	1	1	1	1	1	1	1	1	1	1	1	1	1	1	1	1	75% of 0	1	1	1	1	1	1	1	1	1	1	1	1
AX-147254987	Araip.B07	10840198	2	0	1	1	1	1	1	1	1	1	1	1	1	1	1	1	1	1	1	1	1	1	1	1	1	1	1	1	1	1	1	75% of 0	1	1	1	1	1	1	1	1	1	1	1	1
AX-147227718	Araip.B07	11971794	0	2	1	1	1	1	1	1	1	1	1	1	1	1	1	1	1	1	1	1	1	1	1	1	1	1	1	1	1	1	1	75% of 2	1	1	1	1	1	1	1	1	1	1	1	1
AX-147255089	Araip.B07	13600599	2	0	1	1	1	1	1	1	1	1	1	1	1	1	1	1	1	1	1	1	1	1	1	1	1	1	1	1	1	1	1	75% of 0	1	1	1	1	1	1	1	1	1	1	1	1
AX-147227784	Araip.B07	14093772	0	2	1	1	1	1	1	1	1	1	1	1	1	1	1	1	1	1	1	1	1	1	1	1	1	1	1	1	1	1	1	75% of 2	1	1	1	1	1	1	1	1	1	1	1	1
AX-147227788	Araip.B07	15156201	0	2	1	1	1	1	1	1	1	1	1	1	1	1	1	1	1	1	1	1	1	1	1	1	1	1	1	1	1	1	1	75% of 2	1	1	1	1	1	1	1	1	1	1	1	1
AX-147255116	Araip.B07	15284413	0	2	1	1	1	1	1	1	1	1	1	1	1	1	1	1	1	1	1	1	1	1	1	1	1	1	1	1	1	1	1	75% of 2	1	1	1	1	1	1	1	1	1	1	1	1
AX-147255136	Araip.B07	15969815	2	0	1	1	1	1	1	1	1	1	1	1	1	1	1	1	1	1	1	1	1	1	1	1	1	1	1	1	1	1	1	75% of 0	1	1	1	1	1	1	1	1	1	1	1	1
AX-147255141	Araip.B07	16122350	0	2	1	1	1	1	1	1	1	1	1	1	1	1	1	1	1	1	1	1	1	1	1	1	1	1	1	1	1	1	1	75% of 2	1	1	1	1	1	1	1	1	1	1	1	1
AX-147227894	Araip.B07	17304966	0	2	1	1	1	1	1	1	1	1	1	1	1	1	1	1	1	1	1	1	1	1	1	1	1	1	1	1	1	1	1	75% of 2	1	1	1	1	1	1	1	1	1	1	1	1
AX-147255206	Araip.B07	18563473	0	2	1	1	1	1	1	1	1	1	1	1	1	1	1	1	1	1	1	1	1	1	1	1	1	1	1	1	1	1	1	75% of 2	1	1	1	1	1	1	1	1	1	1	1	1
AX-147255235	Araip.B07	20552702	0	2	1	1	1	1	1	1	1	1	1	1	1	1	1	1	1	1	1	1	1	1	1	1	1	1	1	1	1	1	1	75% of 2	1	1	1	1	1	1	1	1	1	1	1	1
AX-147227952	Araip.B07	20572798	0	2	1	1	1	1	1	1	1	1	1	1	1	1	1	1	1	1	1	1	1	1	1	1	1	1	1	1	1	1	1	75% of 2	1	1	1	1	1	1	1	1	1	1	1	1
AX-147255252	Araip.B07	21517425	0	2	1	1	1	1	1	1	NoCall	1	1	1	1	1	1	1	1	1	1	1	1	1	1	1	1	1	1	1	1	1	1	75% of 2	1	1	1	1	1	1	1	1	1	NoCall	1	1
AX-147255262	Araip.B07	21897658	0	2	1	1	1	1	1	1	1	1	1	1	1	1	1	1	1	1	1	1	1	1	1	1	1	1	1	1	1	1	1	75% of 2	1	1	1	1	1	1	1	1	1	1	1	1
AX-147255371	Araip.B07	25348706	0	2	1	1	1	1	1	1	1	1	1	1	1	1	1	1	1	1	1	1	1	1	1	1	1	1	1	1	1	1	1	75% of 2	1	1	1	1	1	1	1	1	1	1	1	1
AX-177641019	Araip.B07	26046605	0	2	1	1	1	1	1	1	1	1	1	1	1	1	1	1	1	1	1	1	1	1	1	1	1	1	1	1	1	1	1	75% of 2	1	1	1	1	1	1	1	1	1	1	1	1
AX-176800926	Araip.B07	27363729	2	0	1	1	1	1	1	1	1	1	1	1	1	1	1	1	1	1	1	1	1	1	1	1	1	1	1	1	1	1	1	75% of 0	1	1	1	1	1	1	1	1	1	1	1	1
AX-147255420	Araip.B07	27860165	2	0	1	1	1	1	1	1	1	1	1	1	1	1	1	1	1	1	1	1	1	1	1	1	1	1	1	1	1	1	1	75% of 0	1	1	1	1	1	1	1	1	1	1	1	1
AX-147255424	Araip.B07	27914176	2	0	1	1	1	1	1	1	1	1	1	1	1	1	1	1	1	1	1	1	1	1	1	1	1	1	1	1	1	1	1	75% of 0	1	1	1	1	1	1	1	1	1	1	1	1
AX-147228110	Araip.B07	27915494	2	0	1	1	1	1	1	1	1	1	1	1	1	1	1	1	1	1	1	1	1	1	1	1	1	1	1	1	1	1	1	75% of 0	1	1	1	1	1	1	1	1	1	1	1	1
AX-147255436	Araip.B07	28308712	2	0	1	1	1	1	1	1	1	1	1	1	1	1	1	1	1	1	1	1	1	1	1	1	1	1	1	1	1	1	1	75% of 0	1	1	1	1	1	1	1	1	1	1	1	1
AX-147228130	Araip.B07	28655464	2	0	1	1	1	1	1	1	1	1	1	1	1	1	1	1	1	1	1	1	1	1	1	1	1	1	1	1	1	1	1	75% of 0	1	1	1	1	1	1	1	1	1	1	1	1
AX-147228163	Araip.B07	30251264	2	0	1	1	1	1	1	1	1	1	1	1	1	1	1	1	1	1	1	1	1	1	1	1	1	1	1	1	1	1	1	75% of 0	1	1	1	1	1	1	1	1	1	1	1	1
AX-147255516	Araip.B07	31546822	0	2	1	1	1	1	1	1	1	1	1	1	1	1	1	1	1	1	1	1	1	1	1	1	1	1	1	1	1	1	1	75% of 2	1	1	1	1	1	1	1	1	1	1	1	1
AX-147228748	Araip.B07	31580831	0	2	1	1	1	1	1	1	1	1	1	1	1	1	1	1	1	1	1	1	1	1	1	1	1	1	1	1	1	1	1	75% of 2	1	1	1	1	1	1	1	1	1	1	1	1
AX-147255520	Araip.B07	31651259	2	0	1	1	1	1	1	1	1	1	1	1	1	1	1	1	1	1	1	1	1	1	1	1	1	1	1	1	1	1	1	75% of 0	1	1	1	1	1	1	1	1	1	1	1	1
AX-147228754	Araip.B07	31833713	2	0	1	1	1	1	1	1	1	1	1	1	1	1	1	1	1	1	1	1	1	1	1	1	1	1	1	1	1	1	1	75% of 0	1	1	1	1	1	1	1	1	1	1	1	1
AX-147255523	Araip.B07	31836704	0	2	1	1	1	1	1	1	1	1	1	1	1	1	1	1	1	1	1	1	1	1	1	1	1	1	1	1	1	1	1	75% of 2	1	1	1	1	1	1	1	1	1	1	1	1
AX-147228730	Araip.B07	32837473	2	0	1	1	1	1	1	1	1	1	1	1	1	1	1	1	1	1	1	1	1	1	1	1	1	1	1	1	1	1	1	75% of 0	1	1	1	1	1	1	1	1	1	1	1	1
AX-147255538	Araip.B07	32920074	0	2	1	1	1	1	1	1	1	1	1	1	1	1	1	1	1	1	1	1	1	1	1	1	1	1	1	1	1	1	1	75% of 2	1	1	1	1	1	1	1	1	1	1	1	1
AX-147228729	Araip.B07	32920293	2	0	1	1	1	1	1	1	1	1	1	1	1	1	1	1	1	1	1	1	1	1	1	1	1	1	1	1	1	1	1	75% of 0	1	1	1	1	1	1	1	1	1	1	1	1
AX-147228727	Araip.B07	32921084	0	2	1	1	1	1	1	1	1	1	1	1	1	1	1	1	1	1	1	1	1	1	1	1	1	1	1	1	1	1	1	75% of 2	1	1	1	1	1	1	1	1	1	1	1	1
AX-147255570	Araip.B07	35048253	0	2	1	1	1	1	1	1	1	1	1	1	1	1	1	1	1	1	1	1	1	1	1	1	1	1	1	1	1	1	1	75% of 2	1	1	1	1	1	1	1	1	1	1	1	1
AX-147228709	Araip.B07	35049718	0	2	1	1	1	1	1	1	1	1	1	1	1	1	1	1	1	1	1	1	1	1	1	1	1	1	1	1	1	1	1	75% of 2	1	1	1	1	1	1	1	1	1	1	1	1
AX-147255612	Araip.B07	37085810	2	0	1	1	1	1	1	1	1	1	1	1	1	1	1	1	1	1	1	1	1	1	1	1	1	1	1	1	1	1	1	75% of 0	1	1	1	1	1	1	1	1	1	1	1	1
AX-147255615	Araip.B07	37132974	2	0	1	1	1	1	1	1	1	1	1	1	1	1	1	1	1	1	1	1	1	1	1	1	1	1	1	1	1	1	1	75% of 0	1	1	1	1	1	1	1	1	1	1	1	1
AX-147228018	Araip.B07	41606265	2	0	1	1	1	1	1	1	1	1	NoCall	1	1	1	1	1	1	1	1	1	1	1	1	1	1	1	1	1	1	1	1	75% of 0	1	1	1	1	1	1	1	1	1	1	1	1
AX-147255688	Araip.B07	47639339	2	0	1	1	1	1	1	1	1	1	1	1	1	1	1	1	1	1	1	1	1	1	1	1	1	1	1	1	1	1	1	75% of 0	1	1	1	1	1	1	1	1	1	1	1	1
AX-147255711	Araip.B07	50534518	0	2	1	1	1	1	1	1	1	1	1	1	1	1	1	1	1	1	1	1	1	1	1	1	1	1	1	1	1	1	1	75% of 2	1	1	1	1	1	1	1	1	1	1	1	1
AX-147255751	Araip.B07	56999315	2	0	1	1	1	1	1	1	1	1	1	1	1	1	1	1	1	1	1	1	1	1	1	1	1	1	1	1	1	1	1	75% of 0	1	1	1	1	1	1	1	1	1	1	1	1
AX-147255771	Araip.B07	58499018	2	0	1	1	1	1	2	1	1	1	1	1	1	1	1	1	1	1	1	1	1	1	1	1	1	1	1	1	1	1	1	75% of 0	1	1	1	1	1	1	1	1	1	1	1	1
AX-147255805	Araip.B07	63286015	2	0	1	1	1	1	1	1	1	1	1	1	1	1	1	1	1	1	1	1	1	1	1	1	1	1	1	1	1	1	1	75% of 0	1	1	1	1	1	1	1	1	1	1	1	1
AX-147228497	Araip.B07	65895928	0	2	1	1	1	1	1	1	1	1	1	1	1	1	1	1	1	1	1	1	1	1	1	1	1	1	1	1	1	1	1	75% of 2	1	1	1	1	1	1	1	1	1	1	1	1
AX-147230274	Araip.B07	86909176	0	2	1	1	1	1	1	1	1	1	1	1	1	1	1	1	1	1	1	1	1	1	1	1	1	1	1	1	1	1	1	75% of 2	1	1	1	1	1	1	1	1	1	1	1	1
AX-147229538	Araip.B07	111056222	0	2	1	1	1	1	1	1	1	1	1	1	1	1	1	1	1	1	1	1	1	1	1	1	1	1	1	1	1	1	1	75% of 2	1	1	1	1	1	1	1	1	1	1	1	1
AX-147230177	Araip.B07	115826821	0	2	1	1	1	1	1	1	1	1	1	1	1	1	1	1	1	1	1	1	1	1	1	1	1	1	1	1	1	1	1	75% of 2	1	1	1	1	1	1	1	1	1	1	1	1
AX-147229774	Araip.B07	117772971	0	2	NoCall	NoCall	1	1	1	1	1	1	1	1	1	1	1	1	1	1	1	1	1	1	1	1	1	1	1	1	1	1	1	75% of 2	1	1	1	1	1	1	1	1	1	1	1	1
AX-176810429	Araip.B07	118308769	2	0	1	1	1	1	1	1	1	1	1	1	1	1	1	1	1	1	1	1	1	1	1	1	1	1	1	1	1	1	1	75% of 0	1	1	1	1	1	1	1	1	1	1	1	1
AX-147256499	Araip.B07	118893883	0	2	1	1	1	1	1	1	1	1	1	1	1	1	1	1	1	1	1	1	1	1	1	1	1	1	1	1	75% of 2	1	1	75% of 2	1	1	1	1	1	1	1	1	1	1	1	1
AX-147256510	Araip.B07	119410943	2	0	1	1	1	1	1	1	1	1	1	1	1	1	1	1	1	1	1	1	1	1	1	1	1	1	1	1	1	1	1	75% of 0	1	1	1	1	1	1	1	1	1	1	1	1
AX-147229933	Araip.B07	121547179	0	2	1	1	1	1	1	1	1	1	1	1	1	1	1	1	1	1	1	1	1	1	1	1	1	1	1	1	1	1	1	75% of 2	1	1	1	1	1	1	1	1	1	1	1	1
AX-147256671	Araip.B07	122775090	0	2	1	1	1	1	1	1	1	1	1	1	1	1	1	1	1	1	1	1	1	1	1	1	1	1	1	1	1	1	1	75% of 2	1	1	1	1	1	1	1	1	1	1	1	1
AX-147256694	Araip.B07	122943821	2	0	1	1	1	1	1	1	1	1	1	1	1	1	1	1	1	1	1	1	1	1	1	1	1	1	1	1	1	1	1	75% of 0	1	1	1	1	1	1	1	1	1	1	1	1
AX-147230033	Araip.B07	123165948	0	2	1	1	1	1	1	1	1	1	1	1	1	1	1	1	1	1	1	1	1	1	1	1	1	1	1	1	1	1	1	75% of 2	1	1	1	1	1	1	1	1	1	1	1	1
AX-147256716	Araip.B07	123188870	2	0	1	1	1	1	1	1	1	1	1	1	1	1	75% of 2	1	1	1	1	1	1	1	1	1	1	1	1	1	1	1	1	1	1	1	1	1	1	1	1	1	1	1	1	1
AX-147256763	Araip.B07	123871430	2	0	1	1	1	1	1	1	1	1	1	1	1	1	1	1	1	1	1	1	1	1	1	1	1	1	1	1	1	1	1	75% of 0	1	1	1	1	1	1	1	1	1	1	1	1
AX-147230171	Araip.B07	124457204	2	0	1	1	1	1	1	1	1	1	1	1	1	1	1	1	1	1	1	1	1	1	1	1	1	1	1	1	1	1	1	75% of 0	1	1	1	1	1	1	1	1	1	1	1	1
AX-147230230	Araip.B07	125561359	2	0	1	1	1	1	1	1	1	1	1	1	1	1	1	1	1	1	1	1	1	1	1	1	1	1	1	1	1	1	1	75% of 0	1	1	1	1	1	1	1	1	1	1	1	1
AX-147256892	Araip.B07	125807926	2	0	NoCall	2	1	1	1	1	1	1	1	1	1	1	1	1	1	1	1	1	1	1	1	1	1	1	1	1	1	1	1	75% of 0	1	1	1	1	1	1	1	1	1	1	1	1
Red font genotype calls indicate the markers demonstrating segmental replacement in the male parent and segregating among coordinated progenies.
Pink highlight indicates an A. correntina allele replaced an A. ipaensis allele. Blue highlight indiates an A. ipaensis allele replaced an A. Correntina allele.

## Sheet: Table S5
Table S5. New recombination events captured in F2 populations descending from 13-1014 x IpaCor4x_S0:2_F1:4 (brown background) and 13-1014 x IpaCor4x_S0:5_F1:4 (greybackground).
probeset_id			IpaCor4x_S0:2	13-1014	13-1014 x [IpaCor]4x_S0:2_F1:4	Ipa	Cor	13-1014x[IpaCor]4x_S0:2_F1:4_F2:87	13-1014x[IpaCor]4x_S0:2_F1:4_F2:88	13-1014x[IpaCor]4x_S0:2_F1:4_F2:89	13-1014x[IpaCor]4x_S0:2_F1:4_F2:90	13-1014x[IpaCor]4x_S0:2_F1:4_F2:91	13-1014x[IpaCor]4x_S0:2_F1:4_F2:92	13-1014x[IpaCor]4x_S0:2_F1:4_F2:93	13-1014x[IpaCor]4x_S0:2_F1:4_F2:94	13-1014x[IpaCor]4x_S0:2_F1:4_F2:95	13-1014x[IpaCor]4x_S0:2_F1:4_F2:96	13-1014x[IpaCor]4x_S0:2_F1:4_F2:1	13-1014x[IpaCor]4x_S0:2_F1:4_F2:97	13-1014x[IpaCor]4x_S0:2_F1:4_F2:2	13-1014x[IpaCor]4x_S0:2_F1:4_F2:98	13-1014x[IpaCor]4x_S0:2_F1:4_F2:3	13-1014x[IpaCor]4x_S0:2_F1:4_F2:99	13-1014x[IpaCor]4x_S0:2_F1:4_F2:4	13-1014x[IpaCor]4x_S0:2_F1:4_F2:100	13-1014x[IpaCor]4x_S0:2_F1:4_F2:5	13-1014x[IpaCor]4x_S0:2_F1:4_F2:101	13-1014x[IpaCor]4x_S0:2_F1:4_F2:6	13-1014x[IpaCor]4x_S0:2_F1:4_F2:102	13-1014x[IpaCor]4x_S0:2_F1:4_F2:7	13-1014x[IpaCor]4x_S0:2_F1:4_F2:103	13-1014x[IpaCor]4x_S0:2_F1:4_F2:8	13-1014x[IpaCor]4x_S0:2_F1:4_F2:104	13-1014x[IpaCor]4x_S0:2_F1:4_F2:9	13-1014x[IpaCor]4x_S0:2_F1:4_F2:105	13-1014x[IpaCor]4x_S0:2_F1:4_F2:10	13-1014x[IpaCor]4x_S0:2_F1:4_F2:106	13-1014x[IpaCor]4x_S0:2_F1:4_F2:11	13-1014x[IpaCor]4x_S0:2_F1:4_F2:107	13-1014x[IpaCor]4x_S0:2_F1:4_F2:12	13-1014x[IpaCor]4x_S0:2_F1:4_F2:108	13-1014x[IpaCor]4x_S0:2_F1:4_F2:13	13-1014x[IpaCor]4x_S0:2_F1:4_F2:109	13-1014x[IpaCor]4x_S0:2_F1:4_F2:14	13-1014x[IpaCor]4x_S0:2_F1:4_F2:110	13-1014x[IpaCor]4x_S0:2_F1:4_F2:15	13-1014x[IpaCor]4x_S0:2_F1:4_F2:111	13-1014x[IpaCor]4x_S0:2_F1:4_F2:16	13-1014x[IpaCor]4x_S0:2_F1:4_F2:112
								0	8	0	4	2	0	6	0	0	6	7	3	2	7	0	0	0	0	1	1	0	2	0	0	1	33	0	5	0	11	3	3	95	0	0	0	2	1	0	0	0	0
								515	402	515	502	513	515	388	515	515	506	430	438	413	421	515	515	515	515	514	514	515	490	515	514	493	410	515	507	515	424	454	486	374	511	515	513	463	498	515	515	515	515
AX-147210049	B01	81208	1	1	1	0	2	1	1	1	1	1	1	1	1	1	1	1	1	1	1	1	1	1	1	1	1	1	1	1	1	1	1	1	1	1	1	1	1	1	1	1	1	1	1	1	1	1	1
AX-147237387		150561	1	1	1	2	0	1	1	1	1	1	1	1	1	1	1	1	1	1	1	1	1	1	1	1	1	1	1	1	1	1	1	1	1	1	1	1	1	1	1	1	1	1	1	1	1	1	1
AX-147237486		1178547	1	1	1	0	2	1	1	1	1	1	1	1	1	1	1	1	1	1	1	1	1	1	1	1	1	1	1	1	1	1	1	1	1	1	1	1	1	1	1	1	1	1	1	1	1	1	1
AX-147237637		2997354	1	1	1	2	0	1	1	1	1	1	1	1	1	1	1	1	1	1	1	1	1	1	1	1	1	1	1	1	1	1	1	1	1	1	1	1	1	1	1	1	1	1	1	1	1	1	1
AX-147237673		3664291	1	1	1	0	2	1	1	1	1	1	1	1	1	1	1	1	1	1	1	1	1	1	1	1	1	1	1	1	1	1	1	1	1	1	1	1	1	1	1	1	1	1	1	1	1	1	1
AX-147208917		3847921	1	1	1	2	0	1	1	1	1	1	1	1	1	1	1	1	1	1	1	1	1	1	1	1	1	1	1	1	1	1	1	1	1	1	1	1	1	1	1	1	1	1	1	1	1	1	1
AX-176792192		5127668	1	1	1	2	0	1	1	1	1	1	1	1	1	1	1	1	1	1	1	1	1	1	1	1	1	1	1	1	1	1	1	1	1	1	1	1	1	1	1	1	1	1	1	1	1	1	1
AX-147237820		6172579	1	1	1	0	2	1	1	1	1	1	1	1	1	1	1	1	1	1	1	1	1	1	1	1	1	1	1	1	1	1	1	1	1	1	1	1	1	1	1	1	1	1	1	1	1	1	1
AX-147208465		7446233	1	1	1	0	2	1	1	1	1	1	1	1	1	1	1	1	1	1	1	1	1	1	1	1	1	1	1	1	1	1	1	1	1	1	1	1	1	1	1	1	1	1	1	1	1	1	1
AX-147238029		11940342	1	1	1	2	0	1	1	1	1	1	1	1	1	1	1	1	1	1	1	1	1	1	1	1	1	1	1	1	1	1	1	1	1	1	1	1	1	1	1	1	1	1	1	1	1	1	1
AX-147207857		13380935	1	1	1	0	2	1	1	1	1	1	1	1	1	1	1	1	1	1	1	1	1	1	1	1	1	1	1	1	1	1	1	1	1	1	1	1	1	1	1	1	1	1	1	1	1	1	1
AX-176815888		39080748	1	1	1	2	0	1	1	1	1	1	1	1	1	1	1	1	1	1	1	1	1	1	1	1	1	1	1	1	1	1	1	1	1	1	1	1	1	1	1	1	1	1	1	1	1	1	1
AX-147238547		60200322	1	1	1	0	2	1	1	1	1	1	1	1	1	1	1	1	1	1	1	1	1	1	1	1	1	1	1	1	1	1	1	1	1	1	1	1	1	1	1	1	1	1	1	1	1	1	1
AX-147211614		89996217	1	1	1	2	0	1	1	1	1	1	1	1	1	1	1	1	1	1	1	1	1	1	1	1	1	1	1	1	1	1	1	1	1	1	1	1	1	1	1	1	1	1	1	1	1	1	1
AX-147238787		114413307	1	1	1	0	2	1	1	1	1	1	1	1	1	1	1	1	1	1	1	1	1	1	1	1	1	1	1	1	1	1	1	1	1	1	1	1	1	1	1	1	1	1	1	1	1	1	1
AX-147239023		124464955	1	1	1	2	0	1	1	1	1	1	1	1	1	1	1	1	1	1	1	1	1	1	1	1	1	1	1	1	1	1	1	1	1	1	1	1	1	1	1	1	1	1	1	1	1	1	1
AX-147239044		125024356	1	1	1	2	0	1	1	1	1	1	1	1	1	1	1	1	1	1	1	1	1	1	1	1	1	1	1	1	1	1	1	1	1	1	1	1	1	1	1	1	1	1	1	1	1	1	1
AX-147211904		125062333	1	1	1	2	0	1	1	1	1	1	1	1	1	1	1	1	1	1	1	1	1	1	1	1	1	1	1	1	1	1	1	1	1	1	1	1	1	1	1	1	1	1	1	1	1	1	1
AX-176791548		125680443	1	1	1	2	0	1	1	1	1	1	1	1	1	1	1	1	1	1	1	1	1	1	1	1	1	1	1	1	1	1	1	1	1	1	1	1	1	1	1	1	1	1	1	1	1	1	1
AX-147211846		129781748	1	1	1	0	2	1	1	1	1	1	1	1	1	1	1	1	1	1	1	1	1	1	1	1	1	1	1	1	1	1	1	1	1	1	1	1	1	1	1	1	1	1	1	1	1	1	1
AX-147239296		130567670	1	1	1	2	0	1	1	1	1	1	1	1	1	1	1	1	1	1	1	1	1	1	1	1	1	1	1	1	1	1	1	1	1	1	1	1	1	1	1	1	1	1	1	1	1	1	1
AX-147239342		131260267	1	1	1	0	2	1	1	1	1	1	1	1	1	1	1	1	1	1	1	1	1	1	1	1	1	1	1	1	1	1	1	1	1	1	1	1	1	1	1	1	1	1	1	1	1	1	1
AX-147239356		131508851	1	1	1	2	0	1	1	1	1	1	1	1	1	1	1	1	1	1	1	1	1	1	1	1	1	1	1	1	1	1	1	1	1	1	1	1	1	1	1	1	1	1	1	1	1	1	1
AX-147239370		132012446	1	1	1	2	0	1	1	1	1	1	1	1	1	1	1	1	1	1	1	1	1	1	1	1	1	1	1	1	1	1	1	1	1	1	1	1	1	1	1	1	1	1	1	1	1	1	1
AX-147211771		133953201	1	1	1	0	2	1	1	1	1	1	1	1	1	1	1	1	1	1	1	1	1	1	1	1	1	1	1	1	1	1	1	1	1	1	1	1	1	1	1	1	1	1	1	1	1	1	1
AX-147239473		134268318	1	1	1	0	2	1	1	1	1	1	1	1	1	1	1	1	1	1	1	1	1	1	1	1	1	1	1	1	1	1	1	1	1	1	1	1	1	1	1	1	1	1	1	1	1	1	1
AX-147239487		134536599	1	1	1	0	2	1	1	1	1	1	1	1	1	1	1	1	1	1	1	1	1	1	1	1	1	1	1	1	1	1	1	1	1	1	1	1	1	1	1	1	1	1	1	1	1	1	1
AX-147211741		134684342	1	1	1	2	0	1	1	1	1	1	1	1	1	1	1	1	1	1	1	1	1	1	1	1	1	1	1	1	1	1	1	1	1	1	1	1	1	1	1	1	1	1	1	1	1	1	1
AX-176791847		134962036	1	1	1	2	0	1	1	1	1	1	1	1	1	1	1	1	1	1	1	1	1	1	1	1	1	1	1	1	1	1	1	1	1	1	1	1	1	1	1	1	1	1	1	1	1	1	1
AX-147211719		135177307	1	1	1	0	2	1	1	1	1	1	1	1	1	1	1	1	1	1	1	1	1	1	1	1	1	1	1	1	1	1	1	1	1	1	1	1	1	1	1	1	1	1	1	1	1	1	1
AX-147239653		136457606	1	1	1	2	0	1	1	1	1	1	1	1	1	1	1	1	1	1	1	1	1	1	1	1	1	1	1	1	1	1	1	1	1	1	1	1	1	1	1	1	1	1	1	1	1	1	1
AX-147239655		136459757	1	1	1	2	0	1	1	1	1	1	1	1	1	1	1	1	1	1	1	1	1	1	1	1	1	1	1	1	1	1	1	1	1	1	1	1	1	1	1	1	1	1	1	1	1	1	1
AX-176791370		136517497	1	1	1	0	2	1	1	1	1	1	1	1	1	1	1	1	1	1	1	1	1	1	1	1	1	1	1	1	1	1	1	1	1	1	1	1	1	1	1	1	1	1	1	1	1	1	1
AX-147239710		137013263	1	1	1	2	0	1	1	1	1	1	1	1	1	1	1	1	1	1	1	1	1	1	1	1	1	1	1	1	1	1	1	1	1	1	1	1	1	1	1	1	1	1	1	1	1	1	1
AX-147240669	B02	7461443	1	1	1	0	2	1	1	1	1	1	1	1	1	1	1	1	1	1	1	1	1	1	1	1	1	1	1	1	1	1	1	1	1	1	1	1	1	1	1	1	1	1	1	1	1	1	1
AX-147242434		101792131	1	1	1	0	2	1	1	1	1	1	1	1	1	1	1	1	1	1	1	1	1	1	1	1	1	1	1	1	1	1	1	1	1	1	1	1	2	1	1	1	0	1	1	1	1	1	1
AX-147242597		104269177	1	1	1	2	0	1	1	1	1	1	1	1	1	1	1	1	1	1	1	1	1	1	1	1	1	1	1	1	1	1	1	1	2	1	1	1	0	1	1	1	2	1	1	1	1	1	1
AX-147243027	B03	2045587	1	1	1	2	0	1	0	1	1	1	1	0	1	1	1	0	1	1	0	1	1	1	1	1	1	1	1	1	1	1	NoCall	1	1	1	2	1	1	NoCall	1	1	1	0	1	1	1	1	1
AX-147243031		2064362	1	1	1	2	0	1	0	1	1	1	1	0	1	1	1	0	1	1	0	1	1	1	1	1	1	1	1	1	1	1	NoCall	1	1	1	2	1	1	NoCall	1	1	1	0	1	1	1	1	1
AX-176791680		2643570	1	1	1	2	0	1	0	1	1	1	1	0	1	1	1	0	1	1	0	1	1	1	1	1	1	1	1	1	1	1	NoCall	1	1	1	2	1	1	NoCall	1	1	1	NoCall	1	1	1	1	1
AX-147243108		2720233	1	1	1	0	2	1	2	1	1	1	1	2	1	1	1	2	1	1	2	1	1	1	1	1	1	1	1	1	1	1	NoCall	1	1	1	0	1	1	NoCall	1	1	1	2	1	1	1	1	1
AX-147243111		2757923	1	1	1	0	2	1	2	1	1	1	1	2	1	1	1	2	1	1	2	1	1	1	1	1	1	1	1	1	1	1	NoCall	1	1	1	0	1	1	NoCall	1	1	1	2	1	1	1	1	1
AX-147215365		3332357	1	1	1	0	2	1	2	1	1	1	1	2	1	1	1	2	1	1	2	1	1	1	1	1	1	1	1	1	1	1	0	1	1	1	0	1	1	NoCall	1	1	1	2	1	1	1	1	1
AX-147215382		3509889	1	1	1	2	0	1	0	1	1	1	1	0	1	1	1	0	1	1	0	1	1	1	1	1	1	1	1	1	1	1	2	1	1	1	2	1	1	NoCall	1	1	1	0	1	1	1	1	1
AX-147215404		3706821	1	1	1	2	0	1	0	1	1	1	1	0	1	1	1	0	1	1	0	1	1	1	1	1	1	1	1	1	1	1	2	1	1	1	NoCall	1	1	NoCall	1	1	1	0	1	1	1	1	1
AX-176791557		3710551	1	1	1	0	2	1	2	1	1	1	1	2	1	1	1	NoCall	1	1	2	1	1	1	1	1	1	1	1	1	1	1	NoCall	1	1	1	0	1	1	NoCall	1	1	1	2	1	1	1	1	1
AX-147243184		3827651	1	1	1	0	2	1	2	1	1	1	1	2	1	1	1	2	1	1	1	1	1	1	1	1	1	1	1	1	1	1	0	1	1	1	0	1	1	NoCall	1	1	1	2	1	1	1	1	1
AX-147243187		3850050	1	1	1	2	0	1	0	1	1	1	1	0	1	1	1	0	1	1	0	1	1	1	1	1	1	1	1	1	1	1	2	1	1	1	2	1	1	0	1	1	1	0	1	1	1	1	1
AX-147215446		4105836	1	1	1	2	0	1	0	1	1	1	1	0	1	1	1	0	1	1	0	1	1	1	1	1	1	1	1	1	1	1	2	1	1	1	2	1	1	NoCall	1	1	1	0	1	1	1	1	1
AX-147215502		5438226	1	1	1	2	0	1	0	1	1	1	1	NoCall	1	1	1	0	1	1	0	1	1	1	1	1	1	1	1	1	1	1	2	1	1	1	2	1	1	NoCall	1	1	1	0	1	1	1	1	1
AX-147215507		5499712	1	1	1	2	0	1	0	1	1	1	1	0	1	1	1	0	1	1	0	1	1	1	1	1	1	1	1	1	1	1	2	1	1	1	2	1	1	NoCall	1	1	1	0	1	1	1	1	1
AX-147215530		5933901	1	1	1	2	0	1	0	1	1	1	1	0	1	1	1	0	1	1	0	1	1	1	1	1	1	1	1	1	1	1	2	1	1	1	NoCall	1	1	NoCall	1	1	1	0	1	1	1	1	1
AX-147215531		5951334	1	1	1	2	0	1	0	1	1	1	1	0	1	1	1	0	1	1	0	1	1	1	1	1	1	1	1	1	1	1	2	1	1	1	2	1	1	NoCall	1	1	1	0	1	1	1	1	1
AX-147215535		5966735	1	1	1	0	2	1	2	1	1	1	1	2	1	1	1	2	1	1	2	1	1	1	1	1	1	1	1	1	1	1	0	1	1	1	0	1	1	2	1	1	1	2	1	1	1	1	1
AX-147215567		6468118	1	1	1	2	0	1	0	1	1	1	1	0	1	1	1	NoCall	1	1	0	1	1	1	1	1	1	1	1	1	1	2	NoCall	1	1	1	2	1	1	0	1	1	1	0	1	1	1	1	1
AX-147243386		6739039	1	1	1	2	0	1	0	1	1	1	1	0	1	1	1	0	1	1	0	1	1	1	1	1	1	1	1	1	1	1	2	1	1	1	2	1	1	NoCall	1	1	1	0	1	1	1	1	1
AX-147215608		7078911	1	1	1	0	2	1	2	1	1	1	1	2	1	1	1	2	1	1	2	1	1	1	1	1	1	1	1	1	1	1	0	1	1	1	NoCall	1	1	NoCall	1	1	1	2	1	1	1	1	1
AX-147243417		7115308	1	1	1	2	0	1	0	1	1	1	1	0	1	1	1	0	1	1	0	1	1	1	1	1	1	1	1	1	1	1	2	1	1	1	NoCall	1	1	0	1	1	1	0	1	1	1	1	1
AX-147215618		7281597	1	1	1	2	0	1	0	1	1	1	1	0	1	1	1	0	1	1	0	1	1	1	1	1	1	1	1	1	1	1	2	1	1	1	2	1	1	NoCall	1	1	1	0	1	1	1	1	1
AX-147243482		8453289	1	1	1	0	2	1	2	1	1	1	1	2	1	1	1	2	1	1	2	1	1	1	1	1	1	1	1	1	1	1	1	1	1	1	0	1	1	NoCall	1	1	1	2	1	1	1	1	1
AX-147243515		9305571	1	1	1	2	0	1	0	1	1	1	1	0	1	1	1	1	1	1	0	1	1	1	1	1	1	1	1	1	1	1	0	1	1	1	1	1	1	NoCall	1	1	1	0	1	1	1	1	1
AX-147215732		9659255	1	1	1	0	2	1	2	1	1	1	1	2	1	1	1	1	1	1	2	1	1	1	1	1	1	1	1	1	1	1	2	1	1	1	0	1	1	NoCall	1	1	1	2	1	1	1	1	1
AX-147215733		9659458	1	1	1	0	2	1	2	1	1	1	1	2	1	1	1	1	1	1	2	1	1	1	1	1	1	1	1	1	1	1	2	1	1	1	0	1	1	NoCall	1	1	1	2	1	1	1	1	1
AX-147243564		10025285	1	1	1	2	0	1	0	1	1	1	1	0	1	1	1	1	1	1	0	1	1	1	1	1	1	1	1	1	1	1	0	1	1	1	2	1	1	NoCall	1	1	1	0	1	1	1	1	1
AX-147243572		10219417	1	1	1	0	2	1	2	1	1	1	1	2	1	1	1	1	1	1	2	1	1	1	1	1	1	1	1	1	1	1	2	1	1	1	0	1	1	NoCall	1	1	1	2	1	1	1	1	1
AX-176792026		10938340	1	1	1	2	0	1	0	1	1	1	1	0	1	1	1	1	1	1	0	1	1	1	1	1	1	1	1	1	1	1	0	1	1	1	2	1	1	NoCall	1	1	1	0	1	1	1	1	1
AX-147243630		11134681	1	1	1	0	2	1	2	1	1	1	1	2	1	1	1	1	1	1	2	1	1	1	1	1	1	1	1	1	1	1	2	1	1	1	0	1	1	NoCall	1	1	1	2	1	1	1	1	1
AX-176791748		11770952	1	1	1	2	0	1	0	1	1	1	1	0	1	1	1	1	1	1	0	1	1	1	1	1	1	1	1	1	1	1	0	1	1	1	2	1	1	NoCall	1	1	1	0	1	1	1	1	1
AX-147215860		12096960	1	1	1	0	2	1	2	1	1	1	1	2	1	1	1	1	1	1	2	1	1	1	1	1	1	1	1	1	1	1	2	1	1	1	0	1	1	NoCall	1	1	1	2	1	1	1	1	1
AX-147243707		12256114	1	1	1	2	0	1	0	1	1	1	1	0	1	1	1	1	1	1	0	1	1	1	1	1	1	1	1	1	1	1	0	1	1	1	2	1	1	NoCall	1	1	1	0	1	1	1	1	1
AX-147215875		12326400	1	1	1	2	0	1	0	1	1	1	1	0	1	1	1	1	1	1	0	1	1	1	1	1	1	1	1	1	1	1	0	1	1	1	2	1	1	NoCall	1	1	1	0	1	1	1	1	1
AX-147243720		12529144	1	1	1	2	0	1	1	1	1	1	1	NoCall	1	1	1	1	1	1	0	1	1	1	1	1	1	1	1	1	1	1	0	1	2	1	2	1	1	NoCall	1	1	1	0	1	1	1	1	1
AX-147243755		13194296	1	1	1	0	2	1	1	1	1	1	1	2	1	1	1	1	1	1	NoCall	1	1	1	1	1	1	1	1	1	1	1	2	1	1	1	0	1	1	NoCall	1	1	1	2	1	1	1	1	1
AX-147215910		13204150	1	1	1	0	2	1	1	1	1	1	1	2	1	1	1	1	1	1	2	1	1	1	1	1	1	1	1	1	1	1	2	1	1	1	0	1	1	NoCall	1	1	1	2	1	1	1	1	1
AX-147243777		13452626	1	1	1	2	0	1	1	1	1	1	1	0	1	1	1	1	1	1	0	1	1	1	1	1	1	1	1	1	1	1	0	1	1	1	2	1	1	NoCall	1	1	1	0	1	1	1	1	1
AX-147243792		13730784	1	1	1	0	2	1	1	1	1	1	1	2	1	1	1	1	1	1	2	1	1	1	1	1	1	1	1	1	1	1	2	1	1	1	0	1	1	NoCall	1	1	1	2	1	1	1	1	1
AX-147243796		13734270	1	1	1	2	0	1	1	1	1	1	1	0	1	1	1	1	1	1	0	1	1	1	1	1	1	1	1	1	1	1	0	1	1	1	NoCall	1	1	NoCall	1	1	1	0	1	1	1	1	1
AX-147215973		14097045	1	1	1	2	0	1	1	1	1	1	1	0	1	1	1	1	1	1	0	1	1	1	1	1	1	1	1	1	1	1	0	1	1	1	2	1	1	NoCall	1	1	1	0	1	1	1	1	1
AX-147215986		14486060	1	1	1	2	0	1	1	1	1	1	1	0	1	1	1	1	1	1	0	1	1	1	1	1	1	1	1	1	1	1	0	1	1	1	2	1	1	NoCall	1	1	1	0	1	1	1	1	1
AX-176791563		14605682	1	1	1	2	0	1	1	1	1	1	1	0	1	1	1	1	1	1	0	1	1	1	1	1	1	1	1	1	1	1	0	1	1	1	2	1	1	NoCall	1	1	1	0	1	1	1	1	1
AX-147243850		14686177	1	1	1	0	2	1	1	1	1	1	1	2	1	1	1	1	1	1	2	1	1	1	1	1	1	1	1	1	1	1	2	1	1	1	0	1	1	NoCall	1	1	1	2	1	1	1	1	1
AX-147216051		15969710	1	1	1	0	2	1	0	1	1	1	1	2	1	1	1	1	1	1	2	1	1	1	1	1	1	1	1	1	1	1	2	1	1	1	0	1	1	NoCall	1	1	1	2	1	1	1	1	1
AX-147216152		18892236	1	1	1	0	2	1	0	1	1	1	1	2	1	1	1	1	1	1	2	1	1	1	1	1	1	1	1	1	1	1	2	1	1	1	0	1	1	NoCall	1	1	1	2	1	1	1	1	1
AX-147244006		20348943	1	1	1	0	2	1	0	1	1	1	1	2	1	1	1	1	1	1	2	1	1	1	1	1	1	1	1	1	1	1	2	1	1	1	0	1	1	NoCall	1	1	1	2	1	1	1	1	1
AX-176792202		21671440	1	1	1	2	0	1	2	1	1	1	1	0	1	1	1	1	1	1	0	1	1	1	1	1	1	1	1	1	1	1	0	1	1	1	2	1	1	NoCall	0	1	1	0	1	1	1	1	1
AX-147244099		22602041	1	1	1	0	2	1	0	1	1	1	1	2	1	1	1	1	1	1	2	1	1	1	1	1	1	1	1	1	1	1	2	1	1	1	0	1	1	NoCall	1	1	1	2	1	1	1	1	1
AX-147216260		22722718	1	1	1	0	2	1	0	1	1	1	1	2	1	1	1	1	1	1	2	1	1	1	1	1	1	1	1	1	1	1	2	1	1	1	0	1	1	NoCall	1	1	1	2	1	1	1	1	1
AX-147216275		23390757	1	1	1	0	2	1	0	1	1	1	1	2	1	1	1	1	1	1	2	1	1	1	1	1	1	1	1	1	1	1	2	1	1	1	0	1	1	2	1	1	1	NoCall	1	1	1	1	1
AX-147244138		23920896	1	1	1	0	2	1	0	1	1	1	1	2	1	1	1	1	1	1	2	1	1	1	1	1	1	1	1	1	1	1	2	1	1	1	0	1	1	NoCall	1	1	1	2	1	1	1	1	1
AX-147244244		27813366	1	1	1	2	0	1	1	1	1	1	1	0	1	1	1	1	1	1	0	1	1	1	1	1	1	1	1	1	1	1	0	1	1	1	1	1	1	NoCall	1	1	1	1	1	1	1	1	1
AX-147244307		29884433	1	1	1	0	2	1	0	1	1	1	1	2	1	1	1	1	1	1	NoCall	1	1	1	1	1	1	1	1	1	1	1	2	1	1	1	0	1	1	NoCall	1	1	1	1	1	1	1	1	1
AX-147244308		29890400	1	1	1	2	0	1	NoCall	1	1	1	1	0	1	1	1	1	1	1	0	1	1	1	1	1	1	1	1	1	1	1	0	1	1	1	2	1	1	NoCall	1	1	1	1	1	1	1	1	1
AX-147244332		31064403	1	1	1	2	0	1	2	1	1	1	1	0	1	1	1	1	1	1	0	1	1	1	1	1	1	1	1	1	1	1	0	1	1	1	1	1	1	NoCall	1	1	1	1	1	1	1	1	1
AX-147244344		31348390	1	1	1	2	0	1	2	1	1	1	1	NoCall	1	1	1	1	1	1	0	1	1	1	1	1	1	1	1	1	1	1	0	1	1	1	2	1	1	NoCall	1	1	1	1	1	1	1	1	1
AX-147244348		31837864	1	1	1	2	0	1	2	1	1	1	1	0	1	1	1	1	1	1	0	1	1	1	1	1	1	1	1	1	1	1	0	1	1	1	2	1	1	NoCall	1	1	1	1	1	1	1	1	1
AX-147216541		32003713	1	1	1	0	2	1	0	1	1	1	1	2	1	1	1	1	1	1	2	1	1	1	1	1	1	1	1	1	1	1	2	1	1	1	0	1	1	NoCall	1	1	1	1	1	1	1	1	1
AX-147216552		32156437	1	1	1	0	2	1	NoCall	1	1	1	1	2	1	1	1	1	1	1	2	1	1	1	1	1	1	1	1	1	1	1	2	1	1	1	0	1	1	NoCall	1	1	1	1	1	1	1	1	1
AX-147244360		32160523	1	1	1	2	0	1	2	1	1	1	1	0	1	1	1	1	1	1	NoCall	1	1	1	1	1	1	1	1	1	1	1	0	1	1	1	2	1	1	NoCall	1	1	1	1	1	1	1	1	1
AX-147244366		32411856	1	1	1	0	2	1	0	1	1	1	1	2	1	1	1	1	1	1	2	1	1	1	1	1	1	1	1	1	1	1	2	1	1	1	0	1	1	NoCall	1	1	1	1	1	1	1	1	1
AX-147244371		32684049	1	1	1	2	0	1	NoCall	1	1	1	1	0	1	1	NoCall	1	1	1	1	1	1	1	1	1	1	1	1	1	1	1	0	1	1	1	2	1	1	NoCall	1	1	1	1	1	1	1	1	1
AX-176792069		34967853	1	1	1	0	2	1	0	1	1	1	1	2	1	1	1	1	1	1	2	1	1	1	1	1	1	1	1	1	1	1	2	1	1	1	0	1	1	NoCall	1	1	1	1	1	1	1	1	1
AX-147216665		36348015	1	1	1	2	0	1	2	1	1	1	1	0	1	1	1	1	1	1	0	1	1	1	1	1	1	1	1	1	1	1	0	1	1	1	2	1	1	NoCall	1	1	1	1	1	1	1	1	1
AX-147216681		37626446	1	1	1	2	0	1	2	1	1	1	1	0	1	1	1	1	1	1	0	1	1	1	1	1	1	1	1	1	1	1	0	1	1	1	2	1	1	NoCall	1	1	1	1	1	1	1	1	1
AX-147244480		37892457	1	1	1	2	0	1	2	1	1	1	1	0	1	1	1	1	1	1	0	1	1	1	1	1	1	1	1	1	1	1	0	1	1	1	2	1	1	NoCall	1	1	1	1	1	1	1	1	1
AX-147216696		38094400	1	1	1	2	0	1	2	1	1	1	1	0	1	1	1	1	1	1	0	1	1	1	1	1	1	1	1	1	1	1	0	1	1	1	2	1	1	NoCall	1	1	1	1	1	1	1	1	1
AX-147216712		39076032	1	1	1	0	2	1	0	1	1	1	1	1	1	1	1	1	1	1	2	1	1	1	1	1	1	1	1	1	1	1	2	1	1	1	0	1	1	NoCall	1	1	1	1	1	1	1	1	1
AX-147216875		45431688	1	1	1	0	2	1	0	1	1	1	1	1	1	1	1	1	1	1	2	1	1	1	1	1	1	1	1	1	1	1	NoCall	1	1	1	0	1	1	NoCall	1	1	1	1	1	1	1	1	1
AX-147244665		67101397	1	1	1	2	0	1	2	1	1	1	1	1	1	1	1	1	1	1	0	1	1	1	1	1	1	1	1	1	1	1	NoCall	1	1	1	NoCall	1	1	NoCall	1	1	1	1	1	1	1	1	1
AX-147244741		79485686	1	1	1	2	0	1	2	1	1	1	1	1	1	1	1	1	1	1	0	1	1	1	1	1	1	1	1	1	1	1	NoCall	1	1	1	NoCall	1	1	NoCall	1	1	1	1	1	1	1	1	1
AX-147217079		80087504	1	1	1	2	0	1	2	1	1	1	1	1	1	1	1	1	1	1	NoCall	1	1	1	1	1	1	1	1	1	1	1	0	1	1	1	2	1	1	NoCall	1	1	1	1	1	1	1	1	1
AX-147217092		81177101	1	1	1	2	0	1	2	1	1	1	1	1	1	1	1	1	1	1	0	1	1	1	1	1	1	1	1	1	1	1	NoCall	1	1	1	2	1	1	NoCall	1	1	1	1	1	1	1	1	1
AX-147244819		94147076	1	1	1	0	2	1	0	1	1	1	1	1	1	1	1	1	1	1	2	1	1	1	1	1	1	1	1	1	1	1	NoCall	1	1	1	0	1	1	NoCall	1	1	1	1	1	1	1	1	1
AX-147244825		96273946	1	1	1	0	2	1	0	1	1	1	1	1	1	1	1	1	1	1	2	1	1	1	1	1	1	1	1	1	1	1	NoCall	1	1	1	NoCall	1	1	NoCall	1	1	1	1	1	1	1	1	1
AX-176792452		97668497	1	1	1	0	2	1	0	1	1	1	1	1	1	1	1	1	1	1	2	1	1	1	1	1	1	1	1	1	1	1	NoCall	1	1	1	0	1	1	NoCall	1	1	1	1	1	1	1	1	1
AX-176796073		101135108	1	1	1	2	0	1	2	1	1	1	1	1	1	1	1	1	1	1	NoCall	1	1	1	1	1	1	1	1	1	1	1	NoCall	1	1	1	2	1	1	NoCall	1	1	1	1	1	1	1	1	1
AX-147217323		110671095	1	1	1	2	0	1	2	1	1	1	1	1	1	1	1	1	1	1	0	1	1	1	1	1	1	1	1	1	1	1	NoCall	1	1	1	NoCall	1	0	NoCall	1	1	1	1	1	1	1	1	1
AX-176801822		110977954	1	1	1	0	2	1	0	1	1	1	1	1	1	1	1	1	1	1	2	1	1	1	1	1	1	1	1	1	1	1	NoCall	1	1	1	1	1	2	NoCall	1	1	1	1	1	1	1	1	1
AX-147245019		111491523	1	1	1	0	2	1	0	1	1	1	1	1	1	1	1	1	1	1	2	1	1	1	1	1	1	1	1	1	1	1	NoCall	1	1	1	0	1	2	NoCall	1	1	1	1	1	1	1	1	1
AX-147245206		119140542	1	1	1	2	0	1	2	1	1	1	1	1	1	1	1	1	1	1	0	1	1	1	1	1	1	1	1	1	1	1	NoCall	1	1	1	2	1	0	NoCall	1	1	1	1	1	1	1	1	1
AX-147245231		119492017	1	1	1	2	0	1	2	1	1	1	1	1	1	1	1	1	1	1	NoCall	1	1	1	1	1	1	1	1	1	1	1	NoCall	1	1	1	2	1	0	NoCall	1	1	1	1	1	1	1	1	1
AX-147217704		121027945	1	1	1	2	0	1	2	1	1	1	1	1	1	1	1	1	1	1	NoCall	1	1	1	1	1	1	1	1	1	1	1	NoCall	1	1	1	2	1	0	NoCall	1	1	1	1	1	1	1	1	1
AX-147245347		121631285	1	1	1	2	0	1	2	1	1	1	1	1	1	1	1	1	1	1	0	1	1	1	1	1	1	1	1	1	1	1	NoCall	1	1	1	NoCall	1	0	NoCall	1	1	1	1	1	1	1	1	1
AX-147245378		121852157	1	1	1	2	0	1	2	1	1	1	1	1	1	1	1	1	1	1	0	1	1	1	1	1	1	1	1	1	1	1	NoCall	1	1	1	2	1	0	NoCall	1	1	1	1	1	1	1	1	1
AX-147217754		121852712	1	1	1	2	0	1	2	1	1	1	1	1	1	1	1	1	1	1	0	1	1	1	1	1	1	1	1	1	1	1	NoCall	1	1	1	2	1	0	NoCall	1	1	1	1	1	1	1	1	1
AX-147217755		121854350	1	1	1	2	0	1	2	1	1	1	1	1	1	1	1	1	1	1	0	1	1	1	1	1	1	1	1	1	1	1	NoCall	1	1	1	2	1	0	NoCall	1	1	1	1	1	1	1	1	1
AX-147217771		122395965	1	1	1	2	0	1	2	1	1	1	1	1	1	1	1	1	1	1	0	1	1	1	1	1	1	1	1	1	1	1	NoCall	1	1	1	2	1	0	NoCall	1	1	1	1	1	1	1	1	1
AX-147217777		122553546	1	1	1	0	2	1	0	1	1	1	1	1	1	1	1	1	1	1	2	1	1	1	1	1	1	1	1	1	1	1	NoCall	1	1	1	0	1	2	NoCall	1	1	1	1	1	1	1	1	1
AX-147217804		123255261	1	1	1	0	2	1	0	1	1	1	1	1	1	1	1	1	1	1	2	1	1	1	1	1	1	1	1	1	1	1	NoCall	1	1	1	0	1	2	NoCall	1	1	1	1	1	1	1	1	1
AX-147245444		123563194	1	1	1	2	0	1	2	1	1	1	1	1	1	1	1	1	1	1	0	1	1	1	1	1	1	1	1	1	1	1	NoCall	1	1	1	2	1	0	NoCall	1	1	1	1	1	1	1	1	1
AX-147245458		123979866	1	1	1	0	2	1	0	1	1	1	1	1	1	1	1	1	1	1	2	1	1	1	1	1	1	1	1	1	1	1	NoCall	1	1	1	1	1	2	NoCall	1	1	1	1	1	1	1	1	1
AX-147245459		123992503	1	1	1	0	2	1	0	1	1	1	1	1	1	1	1	1	1	1	2	1	1	1	1	1	1	1	1	1	1	1	NoCall	1	1	1	NoCall	1	2	NoCall	1	1	1	1	1	1	1	1	1
AX-147245516		124860378	1	1	1	0	2	1	0	1	1	1	1	1	1	1	1	1	1	1	2	1	1	1	1	1	1	1	1	1	1	1	NoCall	1	1	1	0	1	2	NoCall	1	1	1	1	1	1	1	1	1
AX-147245519		124865730	1	1	1	2	0	1	2	1	1	1	1	1	1	1	1	1	1	1	0	1	1	1	1	1	1	1	1	1	1	1	NoCall	1	1	1	2	1	0	NoCall	1	1	1	1	1	1	1	1	1
AX-147246389	B04	523250	1	1	1	0	2	1	1	1	1	1	1	1	1	1	1	1	0	0	1	1	1	1	1	1	1	1	1	1	1	1	1	1	1	1	1	1	1	1	1	1	1	1	1	1	1	1	1
AX-147246405		613773	1	1	1	2	0	1	1	1	1	1	1	1	1	1	1	1	2	2	1	1	1	1	1	1	1	1	1	1	1	1	1	1	1	1	1	1	1	1	1	1	1	1	1	1	1	1	1
AX-147218775		647417	1	1	1	0	2	1	1	1	1	1	1	1	1	1	1	1	0	0	1	1	1	1	1	1	1	1	1	1	1	1	1	1	1	1	1	1	1	1	1	1	1	1	1	1	1	1	1
AX-147246438		939778	1	1	1	2	0	1	1	1	1	1	1	1	1	1	1	1	2	2	1	1	1	1	1	1	1	1	1	1	1	1	1	1	1	1	1	1	1	1	1	1	1	1	1	1	1	1	1
AX-147218827		1207385	1	1	1	0	2	1	1	1	1	1	1	1	1	1	1	1	0	0	1	1	1	1	1	1	1	1	1	1	1	1	1	1	1	1	1	1	1	1	1	1	1	1	1	1	1	1	1
AX-147218839		1299601	1	1	1	2	0	1	1	1	1	1	1	1	1	1	1	1	2	2	1	1	1	1	1	1	1	1	1	1	1	1	1	1	1	1	1	1	1	1	1	1	1	1	1	1	1	1	1
AX-147246493		1526345	1	1	1	2	0	1	1	1	1	1	1	1	1	1	1	1	2	2	1	1	1	1	1	1	1	1	1	1	1	1	1	1	1	1	1	1	1	1	1	1	1	1	1	1	1	1	1
AX-147218872		1680468	1	1	1	2	0	1	1	1	1	1	1	1	1	1	1	1	2	2	1	1	1	1	1	1	1	1	1	1	1	1	1	1	1	1	1	1	1	1	1	1	1	1	1	1	1	1	1
AX-147218910		1921430	1	1	1	2	0	1	1	1	1	1	1	1	1	1	1	1	2	2	1	1	1	1	1	1	1	1	1	1	1	1	1	1	1	1	1	1	1	1	1	1	1	1	1	1	1	1	1
AX-147246576		2133752	1	1	1	2	0	1	1	1	1	1	1	1	1	1	1	1	2	2	1	1	1	1	1	1	1	1	1	1	1	1	1	1	1	1	1	1	1	1	1	1	1	1	1	1	1	1	1
AX-147246589		2234594	1	1	1	0	2	1	1	1	1	1	1	1	1	1	1	1	0	0	1	1	1	1	1	1	1	1	1	1	1	1	1	1	1	1	1	1	1	1	1	1	1	1	1	1	1	1	1
AX-147246596		2325524	1	1	1	0	2	1	1	1	1	1	1	1	1	1	1	1	1	NoCall	1	1	1	1	1	1	1	1	1	1	1	1	1	1	1	1	1	1	1	1	1	1	1	1	1	1	1	1	1
AX-147246599		2384037	1	1	1	0	2	1	1	1	1	1	1	1	1	1	1	1	0	0	1	1	1	1	1	1	1	1	1	1	1	1	1	1	1	1	1	1	1	1	1	1	1	1	1	1	1	1	1
AX-147246610		2446164	1	1	1	0	2	1	1	1	1	1	1	1	1	1	1	1	0	0	1	1	1	1	1	1	1	1	1	1	1	1	1	1	1	1	1	1	1	1	1	1	1	1	1	1	1	1	1
AX-147218981		3355815	1	1	1	0	2	1	1	1	1	1	1	1	1	1	1	1	0	0	1	1	1	1	1	1	1	1	1	1	1	1	1	1	1	1	1	1	1	1	1	1	1	1	1	1	1	1	1
AX-176791444		4143459	1	1	1	2	0	1	1	1	1	1	1	1	1	1	1	1	2	2	1	1	1	1	1	1	1	1	1	1	1	1	1	1	1	1	1	1	1	1	1	1	1	1	1	1	1	1	1
AX-147246725		4199539	1	1	1	0	2	1	1	1	1	1	1	1	1	1	1	1	0	0	1	1	1	1	1	1	1	1	1	1	1	1	1	1	1	1	1	1	1	1	1	1	1	1	1	1	1	1	1
AX-147246729		4215943	1	1	1	0	2	1	1	1	1	1	1	1	1	1	1	1	0	0	1	1	1	1	1	1	1	1	1	1	1	1	1	1	1	1	1	1	NoCall	1	1	1	1	1	1	1	1	1	1
AX-147246740		4276127	1	1	1	0	2	1	1	1	1	1	1	1	1	1	1	1	0	0	1	1	1	1	1	1	1	1	1	1	1	1	1	1	1	1	1	1	1	1	1	1	1	1	1	1	1	1	1
AX-147246752		4420103	1	1	1	0	2	1	1	1	1	1	1	1	1	1	1	1	0	0	1	1	1	1	1	1	1	1	1	1	1	1	1	1	1	1	1	1	1	1	1	1	1	1	1	1	1	1	1
AX-176791642		4516806	1	1	1	0	2	1	1	1	1	1	1	1	1	1	1	1	0	0	1	1	1	1	1	1	1	1	1	1	1	1	1	1	1	1	1	1	1	1	1	1	1	1	1	1	1	1	1
AX-147246795		4817699	1	1	1	2	0	1	1	1	1	1	1	1	1	1	1	1	2	2	1	1	1	1	1	1	1	1	1	1	1	1	1	1	1	1	1	1	1	1	1	1	1	1	1	1	1	1	1
AX-147246871		5595266	1	1	1	2	0	1	1	1	1	1	1	1	1	1	1	1	2	2	1	1	1	1	1	1	1	1	1	1	1	1	1	1	1	1	1	1	1	1	1	1	1	1	1	1	1	1	1
AX-147219174		5599155	1	1	1	2	0	1	1	1	1	1	1	1	1	1	1	1	2	2	1	1	1	1	1	1	1	1	1	1	1	1	1	1	1	1	1	1	1	1	1	1	1	1	1	1	1	1	1
AX-147246890		5862449	1	1	1	0	2	1	1	1	1	1	1	1	1	1	1	1	0	0	1	1	1	1	1	1	1	1	1	1	1	1	1	1	1	1	1	1	1	1	1	1	1	1	1	1	1	1	1
AX-147219197		6097596	1	1	1	2	0	1	1	1	1	1	1	1	1	1	1	1	2	2	1	1	1	1	1	1	1	1	1	1	1	1	1	1	1	1	1	1	1	1	1	1	1	1	1	1	1	1	1
AX-147246972		8306108	1	1	1	2	0	1	1	1	1	1	1	1	1	1	1	1	2	2	1	1	1	1	1	1	1	1	1	1	1	1	1	1	1	1	1	1	1	1	1	1	1	1	1	1	1	1	1
AX-147247011		8741509	1	1	1	0	2	1	1	1	1	1	1	1	1	1	1	1	0	0	1	1	1	1	1	1	1	1	1	1	1	1	1	1	1	1	1	1	1	1	1	1	1	1	1	1	1	1	1
AX-147219336		9340895	1	1	1	2	0	1	1	1	1	1	1	1	1	1	1	1	2	2	1	1	1	1	1	1	1	1	1	1	1	1	1	1	1	1	1	1	1	1	1	1	1	1	1	1	1	1	1
AX-147219407		10795668	1	1	1	0	2	1	1	1	1	1	1	1	1	1	1	1	0	0	1	1	1	1	1	1	1	1	1	1	1	1	1	1	1	1	1	1	1	1	1	1	1	1	1	1	1	1	1
AX-147219440		11266025	1	1	1	0	2	1	1	1	1	1	1	1	1	1	1	1	0	0	1	1	1	1	1	1	1	1	1	1	1	1	1	1	1	1	1	1	1	1	1	1	1	1	1	1	1	1	1
AX-147219499		13624024	1	1	1	2	0	1	1	1	1	1	1	1	1	1	1	1	2	2	1	1	1	1	1	1	1	1	1	1	1	1	1	1	1	1	1	1	1	1	1	1	1	1	1	1	1	1	1
AX-147247176		13892409	1	1	1	2	0	1	1	1	1	1	1	1	1	1	1	1	2	2	1	1	1	1	1	1	1	1	1	1	1	1	1	1	1	1	1	1	1	1	1	1	1	1	1	1	1	1	1
AX-147219586		16036352	1	1	1	2	0	1	1	1	1	1	1	1	1	1	1	1	2	2	1	1	1	1	1	1	1	1	1	1	1	1	1	1	1	1	1	1	1	1	1	1	1	1	1	1	1	1	1
AX-147247261		16301350	1	1	1	0	2	1	1	1	1	1	1	1	1	1	1	1	0	0	1	1	1	1	1	1	1	1	1	1	1	1	1	1	1	1	1	1	1	1	1	1	1	1	1	1	1	1	1
AX-147247289		17552523	1	1	1	0	2	1	1	1	1	1	1	1	1	1	1	1	0	0	1	1	1	1	1	1	1	1	1	1	1	1	1	1	1	1	1	1	1	1	1	1	1	1	1	1	1	1	1
AX-147219671		19999033	1	1	1	2	0	1	1	1	1	1	1	1	1	1	1	1	2	2	1	1	1	1	1	1	1	1	1	1	1	1	1	1	1	1	1	1	1	1	1	1	1	1	1	1	1	1	1
AX-147219677		20451978	1	1	1	0	2	1	1	1	1	1	1	1	1	1	1	1	0	0	1	1	1	1	1	1	1	1	1	1	1	1	1	1	1	1	1	1	1	1	1	1	1	1	1	1	1	1	1
AX-147219681		20539321	1	1	1	2	0	1	1	1	1	1	1	1	1	1	1	1	2	2	1	1	1	1	1	1	1	1	1	1	1	1	1	1	1	1	1	1	1	1	1	1	1	1	1	1	1	1	1
AX-147219694		20881906	1	1	1	2	0	1	1	1	1	1	1	1	1	1	1	1	2	2	1	1	1	1	1	1	1	1	1	1	1	1	1	1	1	1	1	1	1	1	1	1	1	1	1	1	1	1	1
AX-147247368		20882150	1	1	1	2	0	1	1	1	1	1	1	1	1	1	1	1	2	2	1	1	1	1	1	1	1	1	1	1	1	1	1	1	1	1	1	1	1	1	1	1	1	1	1	1	1	1	1
AX-147247393		21774044	1	1	1	2	0	1	1	1	1	1	1	1	1	1	1	1	2	1	1	1	1	1	1	1	1	1	1	1	1	1	1	1	1	1	1	1	1	1	1	1	1	1	1	1	1	1	1
AX-147219748		23049636	1	1	1	0	2	1	1	1	1	1	1	1	1	1	1	1	0	1	1	1	1	1	1	1	1	1	1	1	1	1	1	1	1	1	1	1	1	1	1	1	1	1	1	1	1	1	1
AX-176791378		25635381	1	1	1	2	0	1	1	1	1	1	1	1	1	1	1	1	2	1	1	1	1	1	1	1	1	1	1	1	1	1	1	1	1	1	1	1	1	1	1	1	1	1	1	1	1	1	1
AX-147219783		25638266	1	1	1	0	2	1	1	1	1	1	1	1	1	1	1	1	0	1	1	1	1	1	1	1	1	1	1	1	1	1	1	1	1	1	1	1	1	1	1	1	1	1	1	1	1	1	1
AX-147219804		27083058	1	1	1	0	2	1	1	1	1	1	1	1	1	1	1	1	0	1	1	1	1	1	1	1	1	1	1	1	1	1	1	1	1	1	1	1	1	1	1	1	1	1	1	1	1	1	1
AX-147247475		27988550	1	1	1	2	0	1	1	1	1	1	1	1	1	1	1	1	2	1	1	1	1	1	1	1	1	1	1	1	1	1	1	1	1	1	1	1	1	1	1	1	1	1	1	1	1	1	1
AX-147247493		29672339	1	1	1	2	0	1	1	1	1	1	1	1	1	1	1	1	2	1	1	1	1	1	1	1	1	1	1	1	1	1	1	1	1	1	1	1	1	1	1	1	1	1	1	1	1	1	1
AX-147219834		29695061	1	1	1	2	0	1	1	1	1	1	1	1	1	1	1	1	2	1	1	1	1	1	1	1	1	1	1	1	1	1	1	1	1	1	1	1	1	1	1	1	1	1	1	1	1	1	1
AX-147219844		29875312	1	1	1	2	0	1	1	1	1	1	1	1	1	1	1	1	2	1	1	1	1	1	1	1	1	1	1	1	1	1	1	1	1	1	1	1	1	1	1	1	1	1	1	1	1	1	1
AX-147247508		30760719	1	1	1	2	0	1	1	1	1	1	1	1	1	1	1	1	2	1	1	1	1	1	1	1	1	1	1	1	1	1	1	1	1	1	1	1	1	1	1	1	1	1	1	1	1	1	1
AX-147219866		33088115	1	1	1	0	2	1	1	1	1	1	1	1	1	1	1	1	0	1	1	1	1	1	1	1	1	1	1	1	1	1	1	1	1	1	1	1	1	1	1	1	1	1	1	1	1	1	1
AX-147219889		34380876	1	1	1	0	2	1	1	1	1	1	1	1	1	1	1	1	0	1	1	1	1	1	1	1	1	1	1	1	1	1	1	1	1	1	1	1	1	1	1	1	1	1	1	1	1	1	1
AX-147219906		37601992	1	1	1	2	0	1	1	1	1	1	1	1	1	1	1	1	2	1	1	1	1	1	1	1	1	1	1	1	1	1	1	1	1	1	1	1	1	1	1	1	1	1	1	1	1	1	1
AX-147219934		39865816	1	1	1	2	0	1	1	1	1	1	1	1	1	1	1	1	2	1	1	1	1	1	1	1	1	1	1	1	1	1	1	1	1	1	1	1	1	1	1	1	1	1	1	1	1	1	1
AX-147219935		40061129	1	1	1	2	0	1	1	1	1	1	1	1	1	1	1	1	2	1	1	1	1	1	1	1	1	1	1	1	1	1	1	1	1	1	1	1	1	1	1	1	1	1	1	1	1	1	1
AX-147247627		56743591	1	1	1	0	2	1	1	1	1	1	1	1	1	1	1	1	0	1	1	1	1	1	1	1	1	1	1	1	1	1	1	1	1	1	1	1	1	1	1	1	1	1	1	1	1	1	1
AX-147220066		70609052	1	1	1	0	2	1	1	1	1	1	1	1	1	1	1	1	0	1	1	1	1	1	1	1	1	1	1	1	1	1	1	1	1	1	1	1	1	1	1	1	1	1	1	1	1	1	1
AX-147247675		73934886	1	1	1	2	0	1	1	1	1	1	1	1	1	1	1	1	2	1	1	1	1	1	1	1	1	1	1	1	1	1	1	1	1	1	1	1	1	1	1	1	1	1	1	1	1	1	1
AX-147220124		78498383	1	1	1	0	2	1	1	1	1	1	1	1	1	1	1	1	0	1	1	1	1	1	1	1	1	1	1	1	1	1	1	1	1	1	1	1	1	1	1	1	1	1	1	1	1	1	1
AX-147220132		78948786	1	1	1	0	2	1	1	1	1	1	1	1	1	1	1	1	0	1	1	1	1	1	1	1	1	1	1	1	1	1	1	1	1	1	1	1	1	1	1	1	1	1	1	1	1	1	1
AX-147247734		82325476	1	1	1	0	2	1	1	1	1	1	1	1	1	1	1	1	0	1	1	1	1	1	1	1	1	1	1	1	1	1	1	1	1	1	1	1	1	1	1	1	1	1	1	1	1	1	1
AX-147220163		82844303	1	1	1	0	2	1	1	1	1	1	1	1	1	1	1	1	0	1	1	1	1	1	1	1	1	1	1	1	1	1	1	1	1	1	1	1	1	1	1	1	1	1	1	1	1	1	1
AX-147220178		83529312	1	1	1	0	2	1	1	1	1	1	1	1	1	1	1	1	0	1	1	1	1	1	1	1	1	1	1	1	1	1	1	1	1	1	1	1	1	1	1	1	1	1	1	1	1	1	1
AX-176792134		83531056	1	1	1	0	2	1	1	1	1	1	1	1	1	1	1	1	NoCall	1	1	1	1	1	1	1	1	1	1	1	1	1	1	1	1	1	1	1	1	1	1	1	1	1	1	1	1	1	1
AX-147247743		84727864	1	1	1	0	2	1	1	1	1	1	1	1	1	1	1	1	0	1	1	1	1	1	1	1	1	1	1	1	1	1	1	1	1	1	1	1	1	1	1	1	1	1	1	1	1	1	1
AX-147220191		84727988	1	1	1	2	0	1	1	1	1	1	1	1	1	1	1	1	2	1	1	1	1	1	1	1	1	1	1	1	1	1	1	1	1	1	1	1	1	1	1	1	1	1	1	1	1	1	1
AX-147247746		85261373	1	1	1	2	0	1	1	1	1	1	1	1	1	1	1	1	2	1	1	1	1	1	1	1	1	1	1	1	1	1	1	1	1	1	1	1	1	1	1	1	1	1	1	1	1	1	1
AX-147220210		88514105	1	1	1	0	2	1	1	1	1	1	1	1	1	1	1	1	NoCall	1	1	1	1	1	1	1	1	1	1	1	1	1	1	1	1	1	1	1	1	1	1	1	1	1	1	1	1	1	1
AX-147219881		91386649	1	1	1	2	0	1	1	1	1	1	1	1	1	1	1	1	2	1	1	1	1	1	1	1	1	1	1	1	1	1	1	1	1	1	1	1	1	1	1	1	1	1	1	1	1	1	1
AX-147247793		96087788	1	1	1	2	0	1	1	1	1	1	1	1	1	1	1	1	2	1	1	1	1	1	1	1	1	1	1	1	1	1	1	1	1	1	1	1	1	1	1	1	1	1	1	1	1	1	1
AX-147220460		111763487	1	1	1	0	2	1	1	1	1	1	1	1	1	1	1	1	0	1	1	1	1	1	1	1	1	1	1	1	1	1	1	1	1	1	1	1	1	1	1	1	1	1	1	1	1	1	1
AX-147248084		113979833	1	1	1	2	0	1	1	1	1	1	1	1	1	1	1	1	2	1	1	1	1	1	1	1	1	1	1	1	1	1	1	1	1	1	1	1	1	1	1	1	1	1	1	1	1	1	1
AX-147220592		115667707	1	1	1	0	2	1	1	1	1	1	1	1	1	1	1	1	0	1	1	1	1	1	1	1	1	1	1	1	1	1	1	1	1	1	1	1	1	1	1	1	1	1	1	1	1	1	1
AX-147248269		119395826	1	1	1	2	0	1	1	1	1	1	1	1	1	1	1	1	2	1	1	1	1	1	1	1	1	1	1	1	1	1	1	1	1	1	1	1	1	1	1	1	1	1	1	1	1	1	1
AX-147248329		121585570	1	1	1	2	0	1	1	1	1	1	1	1	1	1	1	1	2	1	1	1	1	1	1	1	1	1	1	1	1	1	1	1	1	1	1	1	1	1	1	1	1	1	1	1	1	1	1
AX-176791630		122508440	1	1	1	0	2	1	1	1	1	1	1	1	1	1	NoCall	1	0	1	1	1	1	1	1	1	NoCall	1	1	1	1	1	1	1	1	1	1	1	1	1	1	1	1	1	1	1	1	1	1
AX-147220797		122581999	1	1	1	0	2	1	1	1	1	1	1	1	1	1	1	1	NoCall	1	1	1	1	1	1	1	1	1	1	1	1	1	1	1	1	1	1	1	1	1	1	1	1	1	1	1	1	1	1
AX-147249055	B05	6706251	1	1	1	2	0	1	1	1	0	1	1	1	1	1	1	1	1	1	1	1	1	1	1	1	1	1	0	1	2	1	1	1	1	1	1	1	0	1	0	1	1	1	1	1	1	1	1
AX-147221698		8608073	1	1	1	2	0	1	1	1	NoCall	1	1	1	1	1	1	1	1	1	1	1	1	1	1	1	1	1	0	1	1	1	1	1	1	1	1	1	0	1	0	1	1	1	1	1	1	1	1
AX-147249144		9073245	1	1	1	2	0	1	1	1	0	1	1	1	1	1	1	1	1	1	1	1	1	1	1	1	1	1	0	1	1	1	1	1	1	1	1	1	0	1	0	1	1	1	1	1	1	1	1
AX-147249230		11809243	1	1	1	0	2	1	1	1	NoCall	1	1	1	1	1	1	1	1	1	1	1	1	1	1	1	1	1	2	1	1	1	1	1	1	1	1	1	2	1	1	1	1	1	1	1	1	1	1
AX-147221801		11848319	1	1	1	2	0	1	1	1	NoCall	1	1	1	1	1	1	1	1	1	1	1	1	1	1	1	1	1	0	1	1	1	1	1	1	1	1	1	0	1	1	1	1	1	1	1	1	1	1
AX-147221834		12731369	1	1	1	2	0	1	1	1	0	1	1	1	1	1	1	1	1	1	1	1	1	1	1	1	1	1	0	1	1	1	1	1	1	1	1	1	1	1	1	1	1	1	1	1	1	1	1
AX-147249347		15221125	1	1	1	2	0	1	1	1	1	1	1	1	1	1	1	1	1	1	1	1	1	1	1	1	1	1	0	1	1	1	1	1	1	1	1	1	1	1	1	1	1	1	1	1	1	1	1
AX-147249371		15587579	1	1	1	2	0	1	1	1	1	1	1	1	1	1	1	1	1	1	1	1	1	1	1	1	1	1	0	1	1	1	1	1	1	1	1	1	1	1	1	1	1	1	1	1	1	1	1
AX-147249419		16814071	1	1	1	2	0	1	1	1	2	1	1	1	1	1	1	1	1	1	1	1	1	1	1	1	1	1	0	1	1	1	1	1	1	1	1	1	1	1	1	1	1	1	1	1	1	1	1
AX-147222233		23609382	1	1	1	0	2	1	1	1	0	1	1	1	1	1	1	1	1	1	1	1	1	1	1	1	1	1	2	1	1	1	1	1	1	1	1	1	1	1	1	1	1	1	1	1	1	1	1
AX-147249842		34572519	1	1	1	2	0	1	1	1	1	1	1	1	1	1	1	1	1	1	1	1	1	1	1	1	1	1	0	1	1	1	1	1	1	1	1	1	1	1	1	1	1	1	1	1	1	1	1
AX-147222444		36018149	1	1	1	0	2	1	1	1	1	1	1	1	1	1	1	1	1	1	1	1	1	1	1	1	1	1	2	1	1	1	1	1	1	1	1	1	1	1	1	1	1	1	1	1	1	1	1
AX-147222561		62586149	1	1	1	2	0	1	1	1	2	1	1	1	1	1	1	1	1	1	1	1	1	1	1	1	1	1	0	1	1	1	1	1	1	1	1	1	1	1	1	1	1	1	1	1	1	1	1
AX-147250340		123988028	1	1	1	2	0	1	1	1	1	1	1	1	1	1	1	1	1	1	1	1	1	1	1	1	1	1	NoCall	1	1	1	1	1	1	1	1	1	1	1	1	1	1	1	1	1	1	1	1
AX-147223490		123991198	1	1	1	0	2	1	1	1	1	1	1	1	1	1	1	1	1	1	1	1	1	1	1	1	1	1	2	1	1	1	1	1	1	1	1	1	1	1	1	1	1	1	1	1	1	1	1
AX-147250457		128009429	1	1	1	0	2	1	1	1	1	1	1	1	1	1	1	1	1	1	1	1	1	1	1	1	1	1	2	1	1	1	1	1	1	1	1	1	1	1	1	1	1	1	1	1	1	1	1
AX-147223280		134151729	1	1	1	0	2	1	1	1	0	1	1	1	1	1	1	1	1	1	1	1	1	1	1	1	1	1	2	1	1	1	1	1	1	1	1	1	1	1	1	1	1	1	1	1	1	1	1
AX-147223240		135592290	1	1	1	2	0	1	1	1	1	1	1	1	1	1	1	1	1	1	1	1	1	1	1	1	1	1	1	1	1	1	1	1	1	1	1	1	1	1	1	1	1	1	1	1	1	1	1
AX-147250772		139287354	1	1	1	2	0	1	1	1	2	1	1	1	1	1	1	1	1	1	1	1	1	1	1	1	1	1	0	1	1	1	1	1	1	1	1	1	1	1	1	1	1	1	1	1	1	1	1
AX-147223012		140665315	1	1	1	0	2	1	1	1	1	1	1	1	1	1	1	1	1	1	1	1	1	1	1	1	1	1	2	1	1	1	1	1	1	1	1	1	1	1	1	1	1	1	1	1	1	1	1
AX-147250854		141278163	1	1	1	2	0	1	1	1	1	1	1	1	1	1	1	1	1	1	1	1	1	1	1	1	1	1	0	1	1	1	1	1	1	1	1	1	1	1	1	1	1	1	1	1	1	1	1
AX-147222939		141739611	1	1	1	2	0	1	1	1	1	1	1	1	1	1	1	1	1	1	1	1	1	1	1	1	1	1	0	1	1	1	1	1	1	1	1	1	1	1	1	1	1	1	1	1	1	1	1
AX-147222914		142099154	1	1	1	2	0	1	1	1	1	1	1	1	1	1	1	1	1	1	1	1	1	1	1	1	1	1	0	1	1	1	1	1	1	1	1	1	1	1	1	1	1	1	1	1	1	1	1
AX-147222868		142815162	1	1	1	2	0	1	1	1	2	1	1	1	1	1	1	1	1	1	1	1	1	1	1	1	1	1	0	1	1	1	1	1	1	1	1	1	1	1	1	1	1	1	1	1	1	1	1
AX-147251017		143640931	1	1	1	0	2	1	1	1	NoCall	1	1	1	1	1	1	1	1	1	1	1	1	1	1	1	1	1	NoCall	1	1	1	1	1	1	1	1	1	1	1	1	1	1	1	1	1	1	1	1
AX-147251156		145480686	1	1	1	2	0	1	1	1	1	1	1	1	1	1	1	1	1	1	1	1	1	1	1	1	1	1	0	1	1	1	1	1	1	1	1	1	1	1	1	1	1	1	1	1	1	1	1
AX-147224017		149534457	1	1	1	0	2	1	1	1	1	1	1	1	1	1	1	1	1	1	1	1	1	1	1	1	1	1	1	1	1	1	1	1	1	1	1	1	1	1	1	1	1	1	1	1	1	1	1
AX-176791666	B06	336201	1	1	1	0	2	1	1	1	1	1	1	NoCall	1	1	1	0	1	2	1	1	1	1	1	1	1	1	1	1	1	1	1	1	1	1	1	2	1	1	1	1	1	1	1	1	1	1	1
AX-147251529		337522	1	1	1	2	0	1	1	1	1	1	1	0	1	1	1	2	1	0	1	1	1	1	1	1	1	1	1	1	1	1	1	1	1	1	1	0	1	1	1	1	1	1	1	1	1	1	1
AX-147251550		553160	1	1	1	2	0	1	1	1	1	1	1	0	1	1	1	2	1	0	1	1	1	1	1	1	1	1	1	1	1	1	1	1	1	1	1	0	1	1	1	1	1	1	1	1	1	1	1
AX-147251564		791984	1	1	1	0	2	1	1	1	1	1	1	2	1	1	1	0	1	2	1	1	1	1	1	1	1	1	1	1	1	1	1	1	1	1	1	2	1	1	1	1	1	1	1	1	1	1	1
AX-147251566		810804	1	1	1	0	2	1	1	1	1	1	1	2	1	1	1	0	1	2	1	1	1	1	1	1	1	1	1	1	1	1	1	1	1	1	1	2	1	1	1	1	1	1	1	1	1	1	1
AX-147251583		1003130	1	1	1	2	0	1	1	1	1	1	1	0	1	1	1	2	1	0	1	1	1	1	1	1	1	1	1	1	1	1	1	1	1	1	1	0	1	1	1	1	1	1	1	1	1	1	1
AX-147225007		1970944	1	1	1	0	2	1	1	1	1	1	1	2	1	1	1	0	1	2	1	1	1	1	1	1	1	1	1	1	1	1	1	1	1	1	1	2	1	1	1	1	1	1	1	1	1	1	1
AX-147224975		2360150	1	1	1	2	0	1	1	1	1	1	1	0	1	1	1	2	1	0	1	1	1	1	1	1	1	1	1	1	1	1	1	1	1	1	1	0	1	1	1	1	1	1	1	1	1	1	1
AX-147224964		2841807	1	1	1	2	0	1	1	1	1	1	1	0	1	1	1	2	1	0	1	1	1	1	1	1	1	1	1	1	1	1	1	1	1	1	1	0	1	1	1	1	1	1	1	1	1	1	1
AX-147251729		2850755	1	1	1	2	0	1	1	1	1	1	1	0	1	1	1	2	1	0	1	1	1	1	1	1	1	1	1	1	1	1	1	1	1	1	1	0	1	1	1	1	1	1	1	1	1	1	1
AX-147251778		3427300	1	1	1	2	0	1	1	1	1	1	1	0	1	1	1	2	1	0	1	1	1	1	1	1	1	1	1	1	1	1	1	1	1	1	1	0	1	1	1	1	1	1	1	1	1	1	1
AX-147251786		3524354	1	1	1	2	0	1	1	1	1	1	1	0	1	1	1	2	1	0	1	1	1	1	1	1	1	1	1	1	1	1	1	1	1	1	1	0	1	1	1	1	1	1	1	1	1	1	1
AX-147224923		3618146	1	1	1	0	2	1	1	1	1	1	1	NoCall	1	1	1	0	1	2	1	1	1	1	1	1	1	1	1	1	1	1	1	1	1	1	1	2	1	1	1	1	1	1	1	1	1	1	1
AX-147251841		4261431	1	1	1	0	2	1	1	1	1	1	1	2	1	1	1	0	1	2	1	1	1	1	1	1	1	1	1	1	1	1	1	1	1	1	1	2	1	1	1	1	1	1	1	1	1	1	1
AX-147251883		4844463	1	1	1	2	0	1	1	1	1	1	1	0	1	1	1	2	1	0	1	1	1	1	1	1	1	1	1	1	1	1	1	1	1	1	1	0	1	1	1	1	1	1	1	1	1	1	1
AX-147251918		5122562	1	1	1	2	0	1	1	1	1	1	1	0	1	1	1	2	1	0	1	1	1	1	1	1	1	1	1	1	1	1	1	1	1	1	1	0	1	1	1	1	1	1	1	1	1	1	1
AX-147224692		7482192	1	1	1	0	2	1	1	1	1	1	1	2	1	1	1	0	1	2	1	1	1	1	1	1	1	1	1	1	1	1	1	1	1	1	1	2	1	1	1	1	1	1	1	1	1	1	1
AX-147224580		9981487	1	1	1	2	0	1	1	1	1	1	1	0	1	1	1	2	1	0	1	1	1	1	1	1	1	1	1	1	1	1	1	1	1	1	1	0	1	1	1	1	1	1	1	1	1	1	1
AX-176791508		10077633	1	1	1	0	2	1	1	1	1	1	1	2	1	1	1	NoCall	1	2	1	1	1	1	1	1	1	1	1	1	1	1	1	1	1	1	1	2	1	1	1	1	1	1	1	1	1	1	1
AX-147224475		11813369	1	1	1	2	0	1	1	1	1	1	1	1	1	1	1	2	1	0	1	1	1	1	1	1	1	1	1	1	1	1	1	1	1	1	1	NoCall	1	1	1	1	1	1	1	1	1	1	1
AX-147224486		12235672	1	1	1	2	0	1	1	1	1	1	1	0	1	1	1	2	1	0	1	1	1	1	1	1	1	1	1	1	1	1	1	1	1	1	1	NoCall	1	1	1	1	1	1	1	1	1	1	1
AX-147252257		13011374	1	1	1	2	0	1	1	1	1	1	1	0	1	1	1	2	1	0	1	1	1	1	1	1	1	1	1	1	1	1	1	1	1	1	1	0	1	1	1	1	1	1	1	1	1	1	1
AX-147252260		13018840	1	1	1	2	0	1	1	1	1	1	1	0	1	1	1	2	1	0	1	1	1	1	1	1	1	1	1	1	1	1	1	1	1	1	1	0	1	1	1	1	1	1	1	1	1	1	1
AX-147252269		13214406	1	1	1	2	0	1	1	1	1	1	1	0	1	1	1	2	1	0	1	1	1	1	1	1	1	1	1	1	1	1	1	1	1	1	1	0	1	1	1	1	1	1	1	1	1	1	1
AX-176791446		13423987	1	1	1	0	2	1	1	1	1	1	1	2	1	1	1	0	1	2	1	1	1	1	1	1	1	1	1	1	1	1	1	1	1	1	1	2	1	1	1	1	1	1	1	1	1	1	1
AX-147224416		13776031	1	1	1	0	2	1	1	1	1	1	1	2	1	1	1	0	1	2	1	1	1	1	1	1	1	1	1	1	1	1	1	1	1	1	1	2	1	1	1	1	1	1	1	1	1	1	1
AX-147252294		13788999	1	1	1	2	0	1	1	1	1	1	1	0	1	1	1	NoCall	1	0	1	1	1	1	1	1	1	1	1	1	1	1	1	1	1	1	1	NoCall	1	1	1	1	1	1	1	1	1	1	1
AX-147224284		16912769	1	1	1	2	0	1	1	1	1	1	1	0	1	1	1	2	1	0	1	1	1	1	1	1	1	1	1	1	1	1	1	1	1	1	1	0	1	1	1	1	1	1	1	1	1	1	1
AX-147252452		17635813	1	1	1	2	0	1	1	1	1	1	1	0	1	1	1	2	1	0	1	1	1	1	1	1	1	1	1	1	1	1	1	1	1	1	1	0	1	1	1	1	1	1	1	1	1	1	1
AX-147224217		20367604	1	1	1	2	0	1	1	1	1	1	1	0	1	1	1	2	1	0	1	1	1	1	1	1	1	1	1	1	1	1	1	1	1	1	1	0	1	1	1	1	1	1	1	1	1	1	1
AX-147225266		32126337	1	1	1	2	0	1	1	1	1	1	1	0	1	1	1	2	1	0	1	1	1	1	1	1	1	1	1	1	1	1	1	1	1	1	1	0	1	1	1	1	1	1	1	1	1	1	1
AX-147225298		35555951	1	1	1	0	2	1	1	1	1	1	1	NoCall	1	1	1	0	1	2	1	1	1	1	1	1	1	1	1	1	1	1	1	1	1	1	1	2	1	1	1	1	1	1	1	1	1	1	1
AX-147252822		43416782	1	1	1	2	0	1	1	1	1	1	1	0	1	1	1	2	1	0	1	1	1	1	1	1	1	1	1	1	1	1	1	1	1	1	1	0	1	1	1	1	1	1	1	1	1	1	1
AX-147252825		43429596	1	1	1	0	2	1	1	1	1	1	1	2	1	1	1	0	1	2	1	1	1	1	1	1	1	1	1	1	1	1	1	1	1	1	1	2	1	1	1	1	1	1	1	1	1	1	1
AX-147225351		46451377	1	1	1	2	0	1	1	1	1	1	1	0	1	1	1	2	1	0	1	1	1	1	1	1	1	1	1	1	1	1	1	1	1	1	1	0	1	1	1	1	1	1	1	1	1	1	1
AX-147252896		70244267	1	1	1	2	0	1	1	1	1	1	1	0	1	1	1	2	1	0	1	1	1	1	1	1	1	1	1	1	1	1	1	1	1	1	1	0	1	1	1	1	1	1	1	1	1	1	1
AX-147252897		71889393	1	1	1	2	0	1	1	1	1	1	1	1	1	1	1	2	1	1	1	1	1	1	1	1	1	1	1	1	1	1	1	1	1	1	1	1	1	1	1	1	1	1	1	1	1	1	1
AX-147252915		81766535	1	1	1	2	0	1	1	1	1	1	1	0	1	1	1	2	1	0	1	1	1	1	1	1	1	1	1	1	1	1	1	1	1	1	1	0	1	1	1	1	1	1	1	1	1	1	1
AX-147225490		88868242	1	1	1	0	2	1	1	1	1	1	1	2	1	1	1	0	1	2	1	1	1	1	1	1	1	1	1	1	1	1	1	1	1	1	1	2	1	1	1	1	1	1	1	1	1	1	1
AX-147225533		93776286	1	1	1	2	0	1	1	1	1	1	1	0	1	1	1	2	1	0	1	1	1	1	1	1	1	1	1	1	1	1	1	1	1	1	1	0	1	1	1	1	1	1	1	1	1	1	1
AX-147225693		106640156	1	1	1	0	2	1	1	1	1	1	1	2	1	1	1	0	1	2	1	1	1	1	1	1	1	1	1	1	1	1	1	1	1	1	1	2	1	1	1	1	1	1	1	1	1	1	1
AX-147253298		116556703	1	1	1	2	0	1	1	1	1	1	1	1	1	1	1	2	1	0	1	1	1	1	1	1	1	1	1	1	1	1	1	1	1	1	1	0	1	1	1	1	1	1	1	1	1	1	1
AX-147225865		117052024	1	1	1	2	0	1	1	1	1	1	1	0	1	1	1	2	1	NoCall	1	1	1	1	1	1	1	1	1	1	1	1	1	1	1	1	1	0	1	1	1	1	1	1	1	1	1	1	1
AX-147225866		117052763	1	1	1	2	0	1	1	1	1	1	1	0	1	1	1	2	1	0	1	1	1	1	1	1	1	1	1	1	1	1	1	1	1	1	1	0	1	1	1	1	1	1	1	1	1	1	1
AX-147225903		120129414	1	1	1	2	0	1	1	1	1	1	1	0	1	1	1	2	1	0	1	1	1	1	1	1	1	1	1	1	1	1	1	1	1	1	1	0	1	1	1	1	1	1	1	1	1	1	1
AX-147225968		121832857	1	1	1	0	2	1	1	1	1	1	1	2	1	1	1	0	1	2	1	1	1	1	1	1	1	1	1	1	1	1	1	1	1	1	1	2	1	1	1	1	1	1	1	1	1	1	1
AX-147225971		122027559	1	1	1	0	2	1	1	1	1	1	1	2	1	1	1	0	1	2	1	1	1	1	1	1	1	1	1	1	1	1	1	1	1	1	1	2	1	1	1	1	1	1	1	1	1	1	1
AX-147225972		122028511	1	1	1	2	0	1	1	1	1	1	1	0	1	1	1	2	1	0	1	1	1	1	1	1	1	1	1	1	1	1	1	1	1	1	1	0	1	1	1	1	1	1	1	1	1	1	1
AX-147253468		122336830	1	1	1	2	0	1	1	1	1	1	1	0	1	1	1	2	1	0	1	1	1	1	1	1	1	1	1	1	1	1	1	1	1	1	1	0	1	1	1	1	1	1	1	1	1	1	1
AX-147225985		122584355	1	1	1	0	2	1	1	1	1	1	1	2	1	1	1	0	1	2	1	1	1	1	1	1	1	1	1	1	1	1	1	1	1	1	1	2	1	1	1	1	1	1	1	1	1	1	1
AX-147253497		122955687	1	1	1	0	2	1	1	1	1	1	1	2	1	1	1	NoCall	1	2	1	1	1	1	1	1	1	1	1	1	1	1	1	1	1	1	1	2	1	1	1	1	1	1	1	1	1	1	1
AX-147253549		124599239	1	1	1	2	0	1	1	1	1	1	1	0	1	1	1	2	1	0	1	1	1	1	1	1	1	1	1	1	1	1	1	1	1	1	1	0	1	1	1	1	1	1	1	1	1	1	1
AX-147253555		124628344	1	1	1	2	0	1	1	1	1	1	1	0	1	1	1	NoCall	1	0	1	1	1	1	1	1	1	1	1	1	1	1	1	1	1	1	1	0	1	1	1	1	1	1	1	1	1	1	1
AX-147226062		125020507	1	1	1	0	2	1	1	1	1	1	1	2	1	1	1	0	1	2	1	1	1	1	1	1	1	1	1	1	1	1	1	1	1	1	1	2	1	1	1	1	1	1	1	1	1	1	1
AX-147253612		125478078	1	1	1	0	2	1	1	1	1	1	1	2	1	1	1	0	1	2	1	1	1	1	1	1	1	1	1	1	1	1	1	1	1	1	1	2	1	1	1	1	1	1	1	1	1	1	1
AX-147226168		127136710	1	1	1	0	2	1	1	1	1	1	1	2	1	1	1	0	1	2	1	1	1	1	1	1	1	1	1	1	1	1	1	1	1	1	1	2	1	1	1	1	1	1	1	1	1	1	1
AX-147253700		127392267	1	1	1	0	2	1	1	1	1	1	1	2	1	1	1	0	1	2	1	1	1	1	1	1	1	1	1	1	1	1	1	1	1	1	1	2	0	1	1	1	1	1	1	1	1	1	1
AX-147253712		127603924	1	1	1	0	2	1	1	1	1	1	1	2	1	1	1	NoCall	1	2	1	1	1	1	1	1	1	1	1	1	1	1	1	1	1	1	1	2	1	1	1	1	1	1	1	1	1	1	1
AX-147226220		128202341	1	1	1	0	2	1	1	1	1	1	1	2	1	1	1	0	1	2	1	1	1	1	1	1	1	1	1	1	1	1	1	1	1	1	1	2	1	1	1	1	1	1	1	1	1	1	1
AX-147253746		128352935	1	1	1	2	0	1	1	1	1	1	1	0	1	1	1	2	1	0	1	1	1	1	1	1	1	1	1	1	1	1	1	1	1	1	1	0	1	1	1	1	1	1	1	1	1	1	1
AX-147226247		128651804	1	1	1	0	2	1	1	1	1	1	1	2	1	1	1	0	1	2	1	1	1	1	1	1	1	1	1	1	1	1	1	1	1	1	1	2	1	1	1	1	1	1	1	1	1	1	1
AX-147226303		129526826	1	1	1	2	0	1	1	1	1	1	1	0	1	1	1	2	1	0	1	1	1	1	1	1	1	1	1	1	1	1	1	1	1	1	1	0	1	1	1	1	1	1	1	1	1	1	1
AX-147254480	B07	2077018	1	1	1	2	0	1	1	1	1	1	1	1	1	1	1	1	1	1	1	1	1	1	1	1	1	1	1	1	1	1	0	1	1	1	1	1	1	1	1	1	1	1	1	1	1	1	1
AX-147227090		2276988	1	1	1	0	2	1	1	1	1	1	1	1	1	1	1	1	1	1	1	1	1	1	1	1	1	1	1	1	1	1	2	1	1	1	1	1	1	1	1	1	1	1	1	1	1	1	1
AX-147254508		2287113	1	1	1	2	0	1	1	1	1	1	1	1	1	1	1	1	1	1	1	1	1	1	1	1	1	1	1	1	1	1	0	1	1	1	1	1	1	1	1	1	1	1	1	1	1	1	1
AX-147227234		3611413	1	1	1	0	2	1	1	1	1	1	1	1	1	1	1	1	1	1	1	1	1	1	1	1	1	1	1	1	1	1	2	1	1	1	1	1	1	1	1	1	1	1	1	1	1	1	1
AX-176791737		3672837	1	1	1	2	0	1	1	1	1	1	1	1	1	1	1	1	1	1	1	1	1	1	1	1	1	1	1	1	1	1	0	1	1	1	1	1	1	1	1	1	1	1	1	1	1	1	1
AX-147227249		3822697	1	1	1	0	2	1	1	1	1	1	1	1	1	1	1	1	1	1	1	1	1	1	1	1	1	1	1	1	1	1	2	1	1	1	1	1	1	1	1	1	1	1	1	1	1	1	1
AX-147227274		4212446	1	1	1	2	0	1	1	1	1	1	1	1	1	1	1	1	1	1	1	1	1	1	1	1	1	1	1	1	1	1	0	1	1	1	1	1	1	1	1	1	1	1	1	1	1	1	1
AX-147227295		4329902	1	1	1	2	0	1	1	1	1	1	1	1	1	1	1	1	1	1	1	1	1	1	1	1	1	1	1	1	1	1	0	1	1	1	1	1	1	1	1	1	1	1	1	1	1	1	1
AX-147254696		4462775	1	1	1	2	0	1	1	1	1	1	1	1	1	1	1	1	1	1	1	1	1	1	1	1	1	1	1	1	1	1	0	1	1	1	1	1	1	1	1	1	1	1	1	1	1	1	1
AX-147227624		9116658	1	1	1	2	0	1	1	1	1	1	1	1	1	1	1	1	1	1	1	1	1	1	1	1	1	1	1	1	1	1	0	1	1	1	1	1	1	1	1	1	1	1	1	1	1	1	1
AX-147254987		10840198	1	1	1	2	0	1	1	1	1	1	1	1	1	1	1	1	1	1	1	1	1	1	1	1	1	1	1	1	1	1	1	1	1	1	1	1	1	1	1	1	1	1	1	1	1	1	1
AX-147255002		11193620	1	1	1	0	2	1	1	1	1	1	1	1	1	1	1	1	1	1	1	1	1	1	1	1	1	1	1	1	1	1	1	1	1	1	1	1	1	1	1	1	1	1	1	1	1	1	1
AX-147255089		13600599	1	1	1	2	0	1	1	1	1	1	1	1	1	1	1	1	1	1	1	1	1	1	1	1	1	1	1	1	1	1	1	1	1	1	1	1	1	1	1	1	1	1	1	1	1	1	1
AX-147255235		20552702	1	1	1	0	2	1	1	1	1	1	1	1	1	1	1	1	1	1	1	1	1	1	1	1	1	1	1	1	1	1	1	1	1	1	1	1	1	1	1	1	1	1	1	1	1	1	1
AX-147227952		20572798	1	1	1	0	2	1	1	1	1	1	1	1	1	1	1	1	1	1	1	1	1	1	1	1	1	1	1	1	1	1	1	1	1	1	1	1	1	1	1	1	1	1	1	1	1	1	1
AX-147255262		21897658	1	1	1	0	2	1	1	1	1	1	1	1	1	1	1	1	1	1	1	1	1	1	1	1	1	1	1	1	1	1	1	1	1	1	1	1	1	1	1	1	1	1	1	1	1	1	1
AX-147227986		22578887	1	1	1	2	0	1	1	1	1	1	1	1	1	1	1	1	1	1	1	1	1	1	1	1	1	1	1	1	1	1	1	1	1	1	1	1	1	1	1	1	1	1	1	1	1	1	1
AX-147255340		24173946	1	1	1	0	2	1	1	1	1	1	1	1	1	1	1	1	1	1	1	1	1	1	1	1	1	1	1	1	1	1	1	1	1	1	1	1	1	1	1	1	1	1	1	1	1	1	1
AX-147255420		27860165	1	1	1	2	0	1	1	1	1	1	1	1	1	1	1	1	1	1	1	1	1	1	1	1	1	1	1	1	1	1	1	1	1	1	1	1	1	1	1	1	1	1	1	1	1	1	1
AX-147255424		27914176	1	1	1	2	0	1	1	1	1	1	1	1	1	1	1	1	1	1	1	1	1	1	1	1	1	1	1	1	1	1	1	1	1	1	1	1	1	1	1	1	1	1	1	1	1	1	1
AX-147228110		27915494	1	1	1	2	0	1	1	1	1	1	1	1	1	1	1	1	1	1	1	1	1	1	1	1	1	1	1	1	1	1	1	1	1	1	1	1	1	1	1	1	1	1	1	1	1	1	1
AX-147228117		28191254	1	1	1	0	2	1	1	1	1	1	1	1	1	1	1	1	1	1	1	1	1	1	1	1	1	1	1	1	1	1	1	1	1	1	1	1	1	1	1	1	1	1	1	1	1	1	1
AX-147255493		30323058	1	1	1	0	2	1	1	1	1	1	1	1	1	1	1	1	1	1	1	1	1	1	1	1	1	1	1	1	1	1	1	1	1	1	1	1	1	1	1	1	1	1	1	1	1	1	1
AX-147228730		32837473	1	1	1	2	0	1	1	1	1	1	1	1	1	1	1	1	1	1	1	1	1	1	1	1	1	1	1	1	1	1	1	1	1	1	1	1	1	1	1	1	1	1	1	1	1	1	1
AX-147255538		32920074	1	1	1	0	2	1	1	1	1	1	1	1	1	1	1	1	1	1	1	1	1	1	1	1	1	1	1	1	1	1	1	1	1	1	1	1	1	1	1	1	1	1	1	1	1	1	1
AX-147228729		32920293	1	1	1	2	0	1	1	1	1	1	1	1	1	1	1	1	1	1	1	1	1	1	1	1	1	1	1	1	1	1	1	1	1	1	1	1	1	1	1	1	1	1	1	1	1	1	1
AX-147228709		35049718	1	1	1	0	2	1	1	1	1	1	1	1	1	1	1	1	1	1	1	1	1	1	1	1	1	1	1	1	1	1	1	1	1	1	1	1	1	1	1	1	1	1	1	1	1	1	1
AX-176792167		56999059	1	1	1	2	0	1	1	1	1	1	1	1	1	1	1	1	1	1	1	1	1	1	1	1	1	1	1	1	1	1	1	1	1	1	1	1	1	1	1	1	1	1	1	1	1	1	1
AX-147230267		86518309	1	1	1	2	0	1	1	1	1	1	1	1	1	1	1	1	1	1	1	1	1	1	1	1	1	1	1	1	1	1	1	1	1	1	1	1	1	1	1	1	1	1	1	1	1	1	1
AX-147229538		111056222	1	1	1	0	2	1	1	1	1	1	1	1	1	1	1	1	1	1	1	1	1	1	1	1	1	1	1	1	1	1	1	1	1	1	1	1	1	1	1	1	1	1	1	1	1	1	1
AX-147229608		112576208	1	1	1	2	0	1	1	1	1	1	1	1	1	1	1	1	1	1	1	1	1	1	1	1	1	1	1	1	1	1	1	1	1	1	1	1	1	1	1	1	1	1	1	1	1	1	1
AX-147256435		117489255	1	1	1	2	0	1	1	1	1	1	1	1	1	1	1	1	1	1	1	1	1	1	1	1	1	1	1	1	1	1	1	1	1	1	1	1	1	1	1	1	1	1	1	1	1	1	1
AX-147256510		119410943	1	1	1	2	0	1	1	1	1	1	1	1	1	1	1	1	1	1	1	1	1	1	1	1	1	1	1	1	1	1	1	1	1	1	1	1	1	1	1	1	1	1	1	1	1	1	1
AX-147256579		120739249	1	1	1	0	2	1	1	1	1	1	1	1	1	1	1	1	1	1	1	1	1	1	1	1	1	1	1	1	1	1	1	1	1	1	1	1	1	1	1	1	1	1	1	1	1	1	1
AX-147256629		121936875	1	1	1	0	2	1	1	1	1	1	1	1	1	1	1	1	1	1	1	1	1	1	1	1	1	1	1	1	1	1	1	1	1	1	1	1	1	1	1	1	1	1	1	1	1	1	1
AX-147256671		122775090	1	1	1	0	2	1	1	1	1	1	1	1	1	1	1	1	1	1	1	1	1	1	1	1	1	1	1	1	1	1	1	1	1	1	1	1	1	1	1	1	1	1	1	1	1	1	1
AX-147256703		123064389	1	1	1	2	0	1	1	1	1	1	1	1	1	1	1	1	1	1	1	1	1	1	1	1	1	1	1	1	1	1	1	1	1	1	1	1	1	1	1	1	1	1	1	1	1	1	1
AX-147256705		123074801	1	1	1	0	2	1	1	1	1	1	1	1	1	1	1	1	1	1	1	1	1	1	1	1	1	1	1	1	1	1	1	1	1	1	1	1	1	1	1	1	1	1	1	1	1	1	1
AX-147256736		123356479	1	1	1	2	0	1	1	1	1	1	1	1	1	1	1	1	1	1	1	1	1	1	1	1	1	1	1	1	1	1	1	1	1	1	1	1	1	1	1	1	1	1	1	1	1	1	1
AX-147256774		124033208	1	1	1	0	2	1	1	1	1	1	1	1	1	1	1	1	1	1	1	1	1	1	1	1	1	1	1	1	1	1	1	1	1	1	1	1	1	1	1	1	1	1	1	1	1	1	1
AX-147230219		125355484	1	1	1	2	0	1	1	1	1	1	1	1	1	1	1	1	1	1	1	1	1	1	1	1	1	1	1	1	1	1	1	1	1	1	1	1	1	1	1	1	1	1	1	1	1	1	1
AX-147230228		125560576	1	1	1	2	0	1	1	1	1	1	1	1	1	1	1	1	1	1	1	1	1	1	1	1	1	1	1	1	1	1	1	1	1	1	1	1	1	1	1	1	1	1	1	1	1	1	1
AX-147230251		125892382	1	1	1	2	0	1	1	1	1	1	1	1	1	1	1	1	1	1	1	1	1	1	1	1	1	1	1	1	1	1	1	1	1	1	1	1	1	1	1	1	1	1	1	1	1	1	1
AX-147228483	B08	749831	1	1	1	0	2	1	1	1	1	1	1	1	1	1	1	1	1	1	1	1	1	1	1	1	1	1	1	1	1	1	1	1	1	1	1	1	1	1	1	1	1	1	1	1	1	1	1
AX-147257034		1198285	1	1	1	0	2	1	1	1	1	1	1	1	1	1	1	1	1	1	1	1	1	1	1	1	1	1	1	1	1	1	1	1	1	1	1	1	1	1	1	1	1	1	1	1	1	1	1
AX-147230316		1455326	1	1	1	2	0	1	1	1	1	1	1	1	1	1	1	1	1	1	1	1	1	1	1	1	1	1	1	1	1	1	1	1	1	1	1	1	1	1	1	1	1	1	1	1	1	1	1
AX-147230382		2075224	1	1	1	0	2	1	1	1	1	1	1	1	1	1	1	1	1	1	1	1	1	1	1	1	1	1	1	1	1	1	1	1	1	1	1	1	1	1	1	1	1	1	1	1	1	1	1
AX-147257196		2638715	1	1	1	2	0	1	1	1	1	1	1	1	1	1	1	1	1	1	1	1	1	1	1	1	1	1	1	1	1	1	1	1	1	1	1	1	1	1	1	1	1	1	1	1	1	1	1
AX-147257208		2752382	1	1	1	0	2	1	1	1	1	1	1	1	1	1	1	1	1	1	1	1	1	1	1	1	1	1	1	1	1	1	1	1	1	1	1	1	1	1	1	1	1	1	1	1	1	1	1
AX-147257226		2937759	1	1	1	0	2	1	1	1	1	1	1	1	1	1	1	1	1	1	1	1	1	1	1	1	1	1	1	1	1	1	1	1	1	1	1	1	1	1	1	1	1	1	1	1	1	1	1
AX-147257323		4303688	1	1	1	0	2	1	1	1	1	1	1	1	1	1	1	1	1	1	1	1	1	1	1	1	1	1	1	1	1	1	1	1	1	1	1	1	1	1	1	1	1	1	1	1	1	1	1
AX-147230530		4392775	1	1	1	2	0	1	1	1	1	1	1	1	1	1	1	1	1	1	1	1	1	1	1	1	1	1	1	1	1	1	1	1	1	1	1	1	1	1	1	1	1	1	1	1	1	1	1
AX-147257455		6211206	1	1	1	2	0	1	1	1	1	1	1	1	1	1	1	1	1	1	1	1	1	1	1	1	1	1	1	1	1	1	1	1	1	1	1	1	1	1	1	1	1	1	1	1	1	1	1
AX-176792159		6314036	1	1	1	0	2	1	1	1	1	1	1	1	1	1	1	1	1	1	1	1	1	1	1	1	1	1	1	1	1	1	1	1	1	1	1	1	1	1	1	1	1	1	1	1	1	1	1
AX-147230637		6375447	1	1	1	0	2	1	1	1	1	1	1	1	1	1	1	1	1	1	1	1	1	1	1	1	1	1	1	1	1	1	1	1	1	1	1	1	1	1	1	1	1	1	1	1	1	1	1
AX-147230643		6390350	1	1	1	0	2	1	1	1	1	1	1	1	1	1	1	1	1	1	1	1	1	1	1	1	1	1	1	1	1	1	1	1	1	1	1	1	1	1	1	1	1	1	1	1	1	1	1
AX-147230651		6495467	1	1	1	0	2	1	1	1	1	1	1	1	1	1	1	1	1	1	1	1	1	1	1	1	1	1	1	1	1	1	1	1	1	1	1	1	1	1	1	1	1	1	1	1	1	1	1
AX-147257614		9676106	1	1	1	0	2	1	1	1	1	1	1	1	1	1	1	1	1	1	1	1	1	1	1	1	1	1	1	1	1	1	1	1	1	1	1	1	1	1	1	1	1	1	1	1	1	1	1
AX-147257677		11822136	1	1	1	2	0	1	1	1	1	1	1	1	1	1	1	1	1	1	1	1	1	1	1	1	1	1	1	1	1	1	1	1	1	1	1	1	1	1	1	1	1	1	1	1	1	1	1
AX-147257756		14615039	1	1	1	2	0	1	1	1	1	1	1	1	1	1	1	1	1	1	1	1	1	1	1	1	1	1	1	1	1	1	1	1	1	1	1	1	1	1	1	1	1	1	1	1	1	1	1
AX-147230960		16526250	1	1	1	0	2	1	1	1	1	1	1	1	1	1	1	1	1	1	1	1	1	1	1	1	1	1	1	1	1	1	1	1	1	1	1	1	1	1	1	1	1	1	1	1	1	1	1
AX-147257804		16759756	1	1	1	2	0	1	1	1	1	1	1	1	1	1	1	1	1	1	1	1	1	1	1	1	1	1	1	1	1	1	1	1	1	1	1	1	1	1	1	1	1	1	1	1	1	1	1
AX-176791774		16991454	1	1	1	2	0	1	1	1	1	1	1	1	1	1	1	1	1	1	1	1	1	1	1	1	1	1	1	1	1	1	1	1	1	1	1	1	1	1	1	1	1	1	1	1	1	1	1
AX-147257824		17623566	1	1	1	0	2	1	1	1	1	1	1	1	1	1	1	1	1	1	1	1	1	1	1	1	1	1	1	1	1	1	1	1	1	1	1	1	1	1	1	1	1	1	1	1	1	1	1
AX-147230976		17685952	1	1	1	0	2	1	1	1	1	1	1	1	1	1	1	1	1	1	1	1	1	1	1	1	1	1	1	1	1	1	1	1	1	1	1	1	1	1	1	1	1	1	1	1	1	1	1
AX-147257832		18086215	1	1	1	2	0	1	1	1	1	1	1	1	1	1	1	1	1	1	1	1	1	1	1	1	1	1	1	1	1	1	1	1	1	1	1	1	1	1	1	1	1	1	1	1	1	1	1
AX-147257837		18163498	1	1	1	0	2	1	1	1	1	1	1	1	1	1	1	1	1	1	1	1	1	1	1	1	1	1	1	1	1	1	1	1	1	1	1	1	1	1	1	1	1	1	1	1	1	1	1
AX-147258060		26703421	1	1	1	0	2	1	1	1	1	1	1	1	1	1	1	1	1	1	1	1	1	1	1	1	1	1	1	1	1	1	1	1	1	1	1	1	1	1	1	1	1	1	1	1	1	1	1
AX-147229033		43386291	1	1	1	0	2	1	1	1	1	1	1	1	1	1	1	1	1	1	1	1	1	1	1	1	1	1	1	1	1	1	1	1	1	1	1	1	1	1	1	1	1	1	1	1	1	1	1
AX-177642647		106808791	1	1	1	0	2	1	1	1	1	NoCall	1	1	1	1	1	1	1	1	1	1	1	1	1	1	1	1	1	1	1	1	1	1	1	1	1	1	1	1	1	1	1	1	1	1	1	1	1
AX-147231160		107497531	1	1	1	2	0	1	1	1	1	1	1	1	1	1	1	1	1	1	1	1	1	1	1	1	1	1	1	1	1	1	1	1	1	1	1	1	1	1	1	1	1	1	1	1	1	1	1
AX-147258782		110877541	1	1	1	0	2	1	1	1	1	1	1	1	1	1	1	1	1	1	1	1	1	1	1	1	1	1	1	1	1	1	1	1	1	1	1	1	1	1	1	1	1	1	1	1	1	1	1
AX-176792084		110891231	1	1	1	0	2	1	1	1	1	1	1	1	1	1	1	1	1	1	1	1	1	1	1	1	1	1	1	1	1	1	1	1	1	1	1	1	1	1	1	1	1	1	1	1	1	1	1
AX-147231247		112200540	1	1	1	2	0	1	1	1	1	1	1	1	1	1	1	1	1	1	1	1	1	1	1	1	1	1	1	1	1	1	1	1	1	1	1	1	1	1	1	1	1	1	1	1	1	1	1
AX-147231293		115060623	1	1	1	2	0	1	1	1	1	1	1	1	1	1	1	1	1	1	1	1	1	1	1	1	1	1	1	1	1	1	1	1	1	1	1	1	1	1	1	1	1	1	1	1	1	1	1
AX-147231295		116040949	1	1	1	0	2	1	1	1	1	1	1	1	1	1	1	1	1	1	1	1	1	1	1	1	1	1	1	1	1	1	1	1	1	1	1	1	1	1	1	1	1	1	1	1	1	1	1
AX-147231416		119533324	1	1	1	0	2	1	1	1	1	1	1	1	1	1	1	1	1	1	1	1	1	1	1	1	1	1	1	1	1	1	1	1	1	1	1	1	1	1	1	1	1	1	1	1	1	1	1
AX-147259121		120912083	1	1	1	2	0	1	1	1	1	1	1	1	1	1	1	1	1	1	1	1	1	1	1	1	1	1	1	1	1	1	1	1	1	1	1	1	1	1	1	1	1	1	1	1	1	1	1
AX-147259251		123346474	1	1	1	2	0	1	1	1	1	1	1	1	1	1	1	1	1	1	1	1	1	1	1	1	1	1	1	1	1	1	1	1	1	1	1	1	1	1	1	1	1	1	1	1	1	1	1
AX-147259260		123566826	1	1	1	0	2	1	1	1	1	1	1	1	1	1	1	1	1	1	1	1	1	1	1	1	1	1	1	1	1	1	1	1	1	1	1	1	1	1	1	1	1	1	1	1	1	1	1
AX-147259314		124779850	1	1	1	2	0	1	1	1	1	1	1	1	1	1	1	1	1	1	1	1	1	1	1	1	1	1	1	1	1	1	1	1	1	1	1	1	1	1	1	1	1	1	1	1	1	1	1
AX-177639787		125086506	1	1	1	0	2	1	1	1	1	1	1	1	1	1	1	1	1	1	1	1	1	1	1	1	1	1	1	1	1	1	1	1	1	1	1	1	1	1	1	1	1	1	1	1	1	1	1
AX-147231689		125404672	1	1	1	0	2	1	1	1	1	1	1	1	1	1	1	1	1	1	1	1	1	1	1	1	1	1	1	1	1	1	1	1	1	1	1	1	1	1	1	1	1	1	1	1	1	1	1
AX-147259355		125539140	1	1	1	0	2	1	1	1	1	1	1	1	1	1	1	1	1	1	1	1	1	1	1	1	1	1	1	1	1	1	1	1	1	1	1	1	1	1	1	1	1	1	1	1	1	1	1
AX-147259366		125888310	1	1	1	0	2	1	1	1	1	NoCall	1	1	1	1	1	1	1	1	1	1	1	1	1	1	1	1	1	1	1	1	1	1	1	1	1	1	1	1	1	1	1	1	1	1	1	1	1
AX-147259764	B09	2305846	1	1	1	2	0	1	1	1	1	1	1	1	1	1	0	1	1	1	1	1	1	1	1	1	1	1	1	1	1	1	1	1	1	1	1	1	1	2	1	1	1	1	1	1	1	1	1
AX-147259766		2307233	1	1	1	2	0	1	1	1	1	1	1	1	1	1	NoCall	1	1	1	1	1	1	1	1	1	1	1	1	1	1	1	1	1	1	1	1	1	1	2	1	1	1	1	1	1	1	1	1
AX-147232204		2416947	1	1	1	2	0	1	1	1	1	1	1	1	1	1	0	1	1	1	1	1	1	1	1	1	1	1	1	1	1	1	1	1	1	1	1	1	1	2	1	1	1	1	1	1	1	1	1
AX-147259788		2650344	1	1	1	2	0	1	1	1	1	1	1	1	1	1	0	1	1	1	1	1	1	1	1	1	1	1	1	1	1	1	1	1	1	1	1	1	1	2	1	1	1	1	1	1	1	1	1
AX-147232423		5751958	1	1	1	2	0	1	1	1	1	1	1	1	1	1	NoCall	1	1	1	1	1	1	1	1	1	1	1	1	1	1	1	1	1	1	1	1	1	1	2	1	1	1	1	1	1	1	1	1
AX-147260053		6489270	1	1	1	2	0	1	1	1	1	1	1	1	1	1	1	1	1	1	1	1	1	1	1	1	1	1	1	1	1	1	1	1	1	1	1	1	1	2	1	1	1	1	1	1	1	1	1
AX-147232771		14787491	1	1	1	0	2	1	1	1	1	1	1	1	1	1	NoCall	1	1	1	1	1	1	1	1	1	1	1	1	1	1	1	1	1	1	1	1	1	NoCall	0	1	1	1	1	1	1	1	1	1
AX-147260524		15785336	1	1	1	0	2	1	1	1	1	1	1	1	1	1	NoCall	1	1	1	1	1	1	1	1	1	1	1	1	1	1	1	1	1	1	1	1	1	1	NoCall	1	1	1	1	1	1	1	1	1
AX-176792161		24900602	1	1	1	0	2	1	1	1	1	1	1	1	1	1	1	1	1	1	1	1	1	1	1	1	1	1	1	1	1	1	1	1	1	1	1	1	1	1	1	1	1	1	1	1	1	1	1
AX-147233135		29378419	1	1	1	2	0	1	1	1	1	1	1	1	1	1	1	1	1	1	1	1	1	1	1	1	1	1	1	1	1	1	1	1	1	1	1	1	1	1	1	1	1	1	1	1	1	1	1
AX-147260902		32147065	1	1	1	2	0	1	1	1	1	1	1	1	1	1	1	1	1	1	1	1	1	1	1	1	1	1	1	1	1	1	1	1	1	1	1	1	1	1	1	1	1	1	1	1	1	1	1
AX-147261120		56316634	1	1	1	0	2	1	1	1	1	1	1	1	1	1	1	1	1	1	1	1	1	1	1	1	1	1	1	1	1	1	1	1	1	1	1	1	1	0	1	1	1	1	1	1	1	1	1
AX-176791982		115124699	1	1	1	0	2	1	1	1	1	1	1	1	1	1	1	1	1	1	1	1	1	1	1	1	1	1	1	1	1	1	1	1	1	1	1	1	1	0	1	1	1	1	1	1	1	1	1
AX-147261662		126881668	1	1	1	2	0	1	1	1	1	1	1	1	1	1	1	1	1	1	1	1	1	1	1	1	1	1	1	1	1	1	1	1	1	1	1	1	1	0	1	1	1	1	1	1	1	1	1
AX-147261666		126980291	1	1	1	0	2	1	1	1	1	1	1	1	1	1	1	1	1	1	1	1	1	1	1	1	1	1	1	1	1	1	1	1	1	1	1	1	1	0	1	1	1	1	1	1	1	1	1
AX-147233883		127170448	1	1	1	2	0	1	1	1	1	1	1	1	1	1	1	1	1	1	1	1	1	1	1	1	1	1	1	1	1	1	1	1	1	1	1	1	1	0	1	1	1	1	1	1	1	1	1
AX-147233955		130553046	1	1	1	0	2	1	1	1	1	1	1	1	1	1	1	1	1	1	1	1	1	1	1	1	1	1	1	1	1	1	1	1	1	1	1	1	1	NoCall	1	1	1	1	1	1	1	1	1
AX-147261811		132823225	1	1	1	0	2	1	1	1	1	1	1	1	1	1	1	1	1	1	1	1	1	1	1	1	1	1	1	1	1	1	1	1	1	1	1	1	1	1	1	1	1	1	1	1	1	1	1
AX-147261860		135551529	1	1	1	0	2	1	1	1	1	1	1	1	1	1	1	1	1	1	1	1	1	1	1	1	1	1	1	1	1	1	1	1	1	1	1	1	1	NoCall	1	1	1	1	1	1	1	1	1
AX-147234769		135565545	1	1	1	0	2	1	1	1	1	1	1	1	1	1	1	1	1	1	1	1	1	1	1	1	1	1	1	1	1	1	1	1	1	1	1	1	NoCall	2	1	1	1	1	1	1	1	1	1
AX-147261989		138247408	1	1	1	2	0	1	1	1	1	1	1	1	1	1	1	1	1	1	1	1	1	1	1	1	1	1	1	1	1	1	1	1	1	1	1	1	1	2	1	1	1	1	1	1	1	1	1
AX-147262059		140006973	1	1	1	0	2	1	1	1	1	1	1	1	1	1	1	1	1	1	1	1	1	1	1	1	1	1	1	1	1	1	1	1	1	1	1	1	1	2	1	1	1	1	1	1	1	1	1
AX-147234596		140220150	1	1	1	2	0	1	1	1	1	1	1	1	1	1	1	1	1	1	1	1	1	1	1	1	1	1	1	1	1	1	1	1	1	1	1	1	1	2	1	1	1	1	1	1	1	1	1
AX-147262099		140466559	1	1	1	0	2	1	1	1	1	1	1	1	1	1	1	1	1	1	1	1	1	1	1	1	1	1	1	1	1	1	1	1	1	1	1	1	1	2	1	1	1	1	1	1	1	1	1
AX-147262105		140541378	1	1	1	2	0	1	1	1	1	1	1	1	1	1	1	1	1	1	1	1	1	1	1	1	1	1	1	1	1	1	1	1	1	1	1	1	1	2	1	1	1	1	1	1	1	1	1
AX-147234564		140613185	1	1	1	0	2	1	1	1	1	1	1	1	1	1	1	1	1	1	1	1	1	1	1	1	1	1	1	1	1	1	1	1	1	1	1	1	1	2	1	1	1	1	1	1	1	1	1
AX-147234489		141606022	1	1	1	0	2	1	1	1	1	1	1	1	1	1	1	1	1	1	1	1	1	1	1	1	1	1	1	1	1	1	1	1	1	1	1	1	1	2	1	1	1	1	1	1	1	1	1
AX-147262226		142033956	1	1	1	0	2	1	1	1	1	1	1	1	1	1	1	1	1	1	1	1	1	1	1	1	1	1	1	1	1	1	1	1	1	1	1	1	1	2	1	1	1	1	1	1	1	1	1
AX-147262243		142217796	1	1	1	0	2	1	1	1	1	1	1	1	1	1	1	1	1	1	1	1	1	1	1	1	1	1	1	1	1	1	1	1	1	1	1	1	1	2	1	1	1	1	1	1	1	1	1
AX-147262261		142421531	1	1	1	2	0	1	1	1	1	1	1	1	1	1	1	1	1	1	1	1	1	1	1	1	1	1	1	1	1	1	1	1	1	1	1	1	1	2	1	1	1	1	1	1	1	1	1
AX-147262275		142626482	1	1	1	2	0	1	1	1	1	1	1	1	1	1	1	1	1	1	1	1	1	1	1	1	1	1	1	1	1	1	1	1	1	1	1	1	1	2	1	1	1	1	1	1	1	1	1
AX-147262323		143186767	1	1	1	2	0	1	1	1	1	1	1	1	1	1	1	1	1	1	1	1	1	1	1	1	1	1	1	1	1	1	1	1	1	1	1	1	1	2	1	1	1	1	1	1	1	1	1
AX-147262437		144257511	1	1	1	0	2	1	1	1	1	1	1	1	1	1	1	1	1	1	1	1	1	1	1	1	1	1	1	1	1	1	1	1	1	1	1	1	1	2	1	1	1	1	1	1	1	1	1
AX-147234275		144287723	1	1	1	0	2	1	1	1	1	1	1	1	1	1	1	1	1	1	1	1	1	1	1	1	1	1	1	1	1	1	1	1	1	1	1	1	1	2	1	1	1	1	1	1	1	1	1
AX-176791469		144498518	1	1	1	0	2	1	1	1	1	1	1	1	1	1	1	1	1	1	1	1	1	1	1	1	1	1	1	1	1	1	1	1	1	1	1	1	1	1	1	1	1	1	1	1	1	1	1
AX-147262497		144765333	1	1	1	0	2	1	1	1	1	1	1	1	1	1	1	1	1	1	1	1	1	1	1	1	1	1	1	1	1	1	1	1	1	1	1	1	1	NoCall	1	1	1	1	1	1	1	1	1
AX-147262513		144878395	1	1	1	0	2	1	1	1	1	1	1	1	1	1	1	1	1	1	1	1	1	1	1	1	1	1	1	1	1	1	1	1	1	1	1	1	1	1	1	1	1	1	1	1	1	1	1
AX-147262553		145097017	1	1	1	0	2	1	1	1	1	1	1	1	1	1	1	1	1	1	1	1	1	1	1	1	1	1	1	1	1	1	1	1	1	1	1	1	1	2	1	1	1	1	1	1	1	1	1
AX-147262556		145170948	1	1	1	0	2	1	1	1	1	1	1	1	1	1	1	1	1	1	1	1	1	1	1	1	1	1	1	1	1	1	1	1	1	1	1	1	1	2	1	1	1	1	1	1	1	1	1
AX-147262593		145617458	1	1	1	0	2	1	1	1	1	1	1	1	1	1	1	1	1	1	1	1	1	1	1	1	1	1	1	1	1	1	1	1	1	1	1	1	1	2	1	1	1	1	1	1	1	1	1
AX-147234109		145688995	1	1	1	2	0	1	1	1	1	1	1	1	1	1	1	1	1	1	1	1	1	1	1	1	1	1	1	1	1	1	1	1	1	1	1	1	1	2	1	1	1	1	1	1	1	1	1
AX-147262612		145899702	1	1	1	0	2	1	1	1	1	1	1	1	1	1	1	1	1	1	1	1	1	1	1	NoCall	1	1	1	1	1	1	1	1	1	1	1	1	1	2	1	1	1	1	1	1	1	1	1
AX-147234089		145920402	1	1	1	2	0	1	1	1	1	1	1	1	1	1	1	1	1	1	1	1	1	1	1	1	1	1	1	1	1	1	1	1	1	1	1	1	1	2	1	1	1	1	1	1	1	1	1
AX-147262622		146013718	1	1	1	0	2	1	1	1	1	1	1	1	1	1	1	1	1	1	1	1	1	1	1	1	1	1	1	1	1	1	1	1	1	1	1	1	1	2	1	1	1	1	1	1	1	1	1
AX-147262658		146367255	1	1	1	0	2	1	1	1	1	1	1	1	1	1	1	1	1	1	1	1	1	1	1	1	1	1	1	1	1	1	1	1	1	1	1	1	1	2	1	1	1	1	1	1	1	1	1
AX-147234026		146602046	1	1	1	0	2	1	1	1	1	1	1	1	1	1	1	1	1	1	1	1	1	1	1	1	1	1	1	1	1	1	1	1	1	1	1	1	1	2	1	1	1	1	1	1	1	1	1
AX-147262702		146707897	1	1	1	2	0	1	1	1	1	1	1	1	1	1	1	1	1	1	1	1	1	1	1	1	1	1	1	1	1	1	1	1	1	1	1	1	1	2	1	1	1	1	1	1	1	1	1
AX-147262716		146808787	1	1	1	0	2	1	1	1	1	1	1	1	1	1	1	1	1	1	1	1	1	1	1	1	1	1	1	1	1	1	1	1	1	1	1	1	1	2	1	1	1	1	1	1	1	1	1
AX-147233979		146872673	1	1	1	2	0	1	1	1	1	1	1	1	1	1	1	1	1	1	1	1	1	1	1	1	1	1	1	1	1	1	1	1	1	1	1	1	1	2	1	1	1	1	1	1	1	1	1
AX-147262735		146888305	1	1	1	2	0	1	1	1	1	1	1	1	1	1	1	1	1	1	1	1	1	1	1	1	1	1	1	1	1	1	1	1	1	1	1	1	1	2	1	1	1	1	1	1	1	1	1
AX-147233966		147005775	1	1	1	2	0	1	1	1	1	1	1	1	1	1	1	1	1	1	1	1	1	1	1	1	1	1	1	1	1	1	1	1	1	1	1	1	1	2	1	1	1	1	1	1	1	1	1
AX-147262776	B10	243297	1	1	1	0	2	1	1	1	1	1	1	1	1	1	1	1	1	1	1	1	1	1	1	1	1	1	1	1	1	1	1	1	1	1	1	1	1	1	1	1	1	1	1	1	1	1	1
AX-147209410		640310	1	1	1	2	0	1	1	1	1	1	1	1	1	1	1	1	1	1	1	1	1	1	1	1	1	1	1	1	1	1	1	1	1	1	1	1	1	1	1	1	1	1	1	1	1	1	1
AX-147262993		2853060	1	1	1	2	0	1	1	1	1	1	1	1	1	1	1	1	1	1	1	1	1	1	1	1	1	1	1	1	1	1	1	1	1	1	1	1	1	1	1	1	1	1	1	1	1	1	1
AX-147263079		3613179	1	1	1	2	0	1	1	1	1	1	1	1	1	1	1	1	1	1	1	1	1	1	1	1	1	1	1	1	1	1	1	1	1	1	1	1	1	1	1	1	1	1	1	1	1	1	1
AX-147234980		3725976	1	1	1	2	0	1	1	1	1	1	1	1	1	1	1	1	1	1	1	1	1	1	1	1	1	1	1	1	1	1	1	1	1	1	1	1	1	1	1	1	1	1	1	1	1	1	1
AX-147263122		3953948	1	1	1	0	2	1	1	1	1	1	1	1	1	1	1	1	1	1	1	1	1	1	1	1	1	1	1	1	1	1	1	1	1	1	1	1	1	1	1	1	1	1	1	1	1	1	1
AX-147235044		4589502	1	1	1	2	0	1	1	1	1	1	1	1	1	1	1	1	1	1	1	1	1	1	1	1	1	1	1	1	1	1	1	1	1	1	1	1	1	1	1	1	1	1	1	1	1	1	1
AX-147235064		4947281	1	1	1	2	0	1	1	1	1	1	1	1	1	1	1	1	1	1	1	1	1	1	1	1	1	1	1	1	1	1	1	1	1	1	1	1	1	1	1	1	1	1	1	1	1	1	1
AX-147235073		5063278	1	1	1	0	2	1	1	1	1	1	1	1	1	1	1	1	1	1	1	1	1	1	1	1	1	1	1	1	1	1	1	1	1	1	1	1	1	1	1	1	1	1	1	1	1	1	1
AX-147235101		5359564	1	1	1	0	2	1	1	1	1	1	1	1	1	1	1	1	1	1	1	1	1	1	1	1	1	1	1	1	1	1	1	1	1	1	1	1	1	1	1	1	1	1	1	1	1	1	1
AX-147263314		8610411	1	1	1	0	2	1	1	1	1	1	1	1	1	1	1	1	1	1	1	1	1	1	1	1	1	1	1	1	1	1	1	1	1	1	1	1	1	1	1	1	1	1	1	1	1	1	1
AX-147235218		9297607	1	1	1	2	0	1	1	1	1	1	1	1	1	1	1	1	1	1	1	1	1	1	1	1	1	1	1	1	1	1	1	1	1	1	1	1	1	1	1	1	1	1	1	1	1	1	1
AX-147235228		9389918	1	1	1	0	2	1	1	1	1	1	1	1	1	1	1	1	1	1	1	1	1	1	1	1	1	1	1	1	1	1	1	1	1	1	1	1	1	1	1	1	1	1	1	1	1	1	1
AX-147263392		9965707	1	1	1	2	0	1	1	1	1	1	1	1	1	1	1	1	1	1	1	1	1	1	1	1	1	1	1	1	1	1	1	1	1	1	1	1	1	1	1	1	1	1	1	1	1	1	1
AX-147263541		13011454	1	1	1	2	0	1	1	1	1	1	1	1	1	1	1	1	1	1	1	1	1	1	1	1	1	1	1	1	1	1	1	1	2	1	1	1	1	1	1	1	1	1	1	1	1	1	1
AX-147263564		13757392	1	1	1	0	2	1	1	1	1	1	1	1	1	1	1	1	1	1	1	1	1	1	1	1	1	1	1	1	1	1	1	1	1	1	1	1	1	1	1	1	1	1	1	1	1	1	1
AX-147235447		14595696	1	1	1	2	0	1	1	1	1	1	1	1	1	1	1	1	1	1	1	1	1	1	1	1	1	1	1	1	1	1	1	1	1	1	1	1	1	1	1	1	1	1	1	1	1	1	1
AX-147263614		15543663	1	1	1	2	0	1	1	1	1	1	1	1	1	1	1	1	1	1	1	1	1	1	1	1	1	1	1	1	1	1	1	1	1	1	1	1	1	1	1	1	1	1	1	1	1	1	1
AX-147235548		18088945	1	1	1	2	0	1	1	1	1	1	1	1	1	1	1	1	1	1	1	1	1	1	1	1	1	1	1	1	1	1	1	1	1	1	1	1	1	1	1	1	1	1	1	1	1	1	1
AX-147263704		18834859	1	1	1	2	0	1	1	1	1	1	1	1	1	1	1	1	1	1	1	1	1	1	1	1	1	1	1	1	1	1	1	1	1	1	1	1	1	1	1	1	1	1	1	1	1	1	1
AX-147235565		18836359	1	1	1	2	0	1	1	1	1	1	1	1	1	1	1	1	1	1	1	1	1	1	1	1	1	1	1	1	1	1	1	1	NoCall	1	1	1	1	1	1	1	1	1	1	1	1	1	1
AX-147263784		24124631	1	1	1	0	2	1	1	1	1	1	1	1	1	1	1	1	1	1	1	1	1	1	1	1	1	1	1	1	1	1	1	1	1	1	1	1	1	1	1	1	1	1	1	1	1	1	1
AX-147235666		27394255	1	1	1	0	2	1	1	1	1	1	1	1	1	1	1	1	1	1	1	1	1	1	1	1	1	1	1	1	1	1	1	1	1	1	1	1	1	1	1	1	1	1	1	1	1	1	1
AX-147264020		47046443	1	1	1	0	2	1	1	1	1	1	1	1	1	1	1	1	1	1	1	1	1	1	1	1	1	1	1	1	1	1	1	1	NoCall	1	1	1	1	1	1	1	1	1	1	1	1	1	1
AX-147235887		54816842	1	1	1	2	0	1	2	1	1	1	1	1	1	1	1	1	1	1	1	1	1	1	1	1	1	1	1	1	1	1	1	1	NoCall	1	1	1	1	1	1	1	1	1	1	1	1	1	1
AX-147235889		54817904	1	1	1	2	0	1	2	1	1	1	1	1	1	1	1	1	1	1	1	1	1	1	1	1	1	1	1	1	1	1	1	1	1	1	1	1	1	1	1	1	1	1	1	1	1	1	1
AX-147235914		57967748	1	1	1	0	2	1	2	1	1	1	1	1	1	1	1	1	1	1	1	1	1	1	1	1	1	1	1	1	1	1	1	1	1	1	1	1	1	1	1	1	1	1	1	1	1	1	1
AX-176791945		60635070	1	1	1	2	0	1	2	1	1	1	1	1	1	1	1	1	1	1	1	1	1	1	1	1	1	1	1	1	1	1	1	1	1	1	1	1	1	1	1	1	1	1	1	1	1	1	1
AX-147235929		63228940	1	1	1	2	0	1	1	1	1	1	1	1	1	1	1	1	1	1	1	1	1	1	1	1	1	1	1	1	1	1	1	1	1	1	1	1	1	1	1	1	1	1	1	1	1	1	1
AX-147235821		81286928	1	1	1	2	0	1	NoCall	1	1	1	1	1	1	1	1	1	1	1	1	1	1	1	1	1	1	1	1	1	1	1	1	1	1	1	1	1	1	1	1	1	1	1	1	1	1	1	1
AX-147236047		95063740	1	1	1	0	2	1	0	1	1	1	1	1	1	1	1	1	1	1	1	1	1	1	1	1	1	1	1	1	1	1	1	1	1	1	1	1	1	1	1	1	1	1	1	1	1	1	1
AX-147236053		95083830	1	1	1	0	2	1	0	1	1	1	1	1	1	1	1	1	1	1	1	1	1	1	1	1	1	1	1	1	1	1	1	1	1	1	1	1	1	1	1	1	1	1	1	1	1	1	1
AX-147236182		106459150	1	1	1	2	0	1	0	1	1	1	1	1	1	1	1	1	1	1	1	1	1	1	1	1	1	1	1	1	1	1	1	1	1	1	1	1	1	1	1	1	1	1	1	1	1	1	1
AX-176791596		107148156	1	1	1	0	2	1	0	1	1	1	1	1	1	1	1	1	1	1	1	1	1	1	1	1	1	1	1	1	1	1	1	1	1	1	1	1	1	1	1	1	1	1	1	1	1	1	1
AX-147264294		109819312	1	1	1	2	0	1	0	1	1	1	1	1	1	1	1	1	1	1	1	1	1	1	1	1	1	1	1	1	1	1	1	1	1	1	1	1	1	1	1	1	1	1	1	1	1	1	1
AX-147264310		110658333	1	1	1	2	0	1	0	1	1	1	1	1	1	1	1	1	1	1	1	1	1	1	1	1	1	1	1	1	1	1	1	1	1	1	1	1	1	1	1	1	1	1	1	1	1	1	1
AX-147264333		111286352	1	1	1	0	2	1	0	1	1	1	1	1	1	1	1	1	1	1	1	1	1	1	1	1	1	1	1	1	1	1	1	1	NoCall	1	1	1	1	1	1	1	1	1	1	1	1	1	1
AX-147236319		112911970	1	1	1	2	0	1	NoCall	1	1	1	1	1	1	1	1	1	1	1	1	1	1	1	1	1	1	1	1	1	1	1	1	1	1	1	1	1	1	1	1	1	1	1	1	1	1	1	1
AX-177643082		113181818	1	1	1	2	0	1	1	1	1	1	1	1	1	1	1	1	1	1	1	1	1	1	1	1	1	1	1	1	1	1	1	1	1	1	1	1	1	1	1	1	1	1	1	1	1	1	1
AX-147264453		117045417	1	1	1	0	2	1	NoCall	1	1	1	1	1	1	1	1	1	1	1	1	1	1	1	1	1	1	1	1	1	1	1	1	1	1	1	1	1	1	1	1	1	1	1	1	1	1	1	1
AX-147236403		117395594	1	1	1	2	0	1	NoCall	1	1	1	1	1	1	1	1	1	1	1	1	1	1	1	1	1	1	1	1	1	1	1	1	1	1	1	1	1	1	1	1	1	1	1	1	1	1	1	1
AX-147264487		117874587	1	1	1	2	0	1	2	1	1	1	1	1	1	1	1	1	1	1	1	1	1	1	1	1	1	1	1	1	1	1	1	1	1	1	1	1	1	1	1	1	1	1	1	1	1	1	1
AX-147236415		117929709	1	1	1	2	0	1	2	1	1	1	1	1	1	1	1	1	1	1	1	1	1	1	1	1	1	1	1	1	1	1	1	1	1	1	1	1	1	1	1	1	1	1	1	1	1	1	1
AX-147264523		119025406	1	1	1	2	0	1	2	1	1	1	1	1	1	1	1	1	1	1	1	1	1	1	1	1	1	1	1	1	1	1	1	1	1	1	1	1	1	1	1	1	1	1	1	1	1	1	1
AX-147264539		119409444	1	1	1	2	0	1	2	1	1	1	1	1	1	1	1	1	1	1	1	1	1	1	1	1	1	1	1	1	1	1	1	1	1	1	1	1	1	1	1	1	1	1	1	1	1	1	1
AX-147236441		119474511	1	1	1	0	2	1	2	1	1	1	1	1	1	1	1	1	1	1	1	1	1	1	1	1	1	1	1	1	1	1	1	1	1	1	1	1	1	1	1	1	1	1	1	1	1	1	1
AX-176791788		119780326	1	1	1	0	2	1	2	1	1	1	1	1	1	1	1	1	1	1	1	1	1	1	1	1	1	1	1	1	1	1	1	1	1	1	1	1	1	1	1	1	1	1	1	1	1	1	1
AX-147236513		123112569	1	1	1	0	2	1	2	1	1	1	1	1	1	1	1	1	1	1	1	1	1	1	1	1	1	1	1	1	1	1	1	1	1	1	1	1	1	1	1	1	1	1	1	1	1	1	1
AX-147264757		126300359	1	1	1	0	2	1	2	1	1	1	1	1	1	1	1	1	1	1	1	1	1	1	1	1	1	1	1	1	1	1	1	1	1	1	1	1	1	1	1	1	1	1	1	1	1	1	1
AX-147236650		126619209	1	1	1	0	2	1	2	1	1	1	1	1	1	1	1	1	1	1	1	1	1	1	1	1	1	1	1	1	1	1	1	1	1	1	1	1	1	1	1	1	1	1	1	1	1	1	1
AX-147236693		127876169	1	1	1	2	0	1	NoCall	1	1	1	1	1	1	1	1	1	1	1	1	1	1	1	1	1	1	1	1	1	1	1	1	1	1	1	1	1	1	1	1	1	1	1	1	1	1	1	1
AX-147236707		128125033	1	1	1	2	0	1	2	1	1	1	1	1	1	1	1	1	1	1	1	1	1	1	1	1	1	1	1	1	1	1	1	1	1	1	1	1	1	1	1	1	1	1	1	1	1	1	1
AX-147264858		129004269	1	1	1	0	2	1	0	1	1	1	1	1	1	1	1	1	1	1	1	1	1	1	1	1	1	1	1	1	1	1	1	1	1	1	1	1	1	1	1	1	1	1	1	1	1	1	1
AX-147264882		129468313	1	1	1	2	0	1	2	1	1	1	1	1	1	1	1	1	1	1	1	1	1	1	1	1	1	1	1	1	1	1	1	1	1	1	1	1	1	1	1	1	1	1	1	1	1	1	1
AX-147264927		130475564	1	1	1	0	2	1	1	1	1	1	1	1	1	1	1	1	1	1	1	1	1	1	1	1	1	1	1	1	1	1	1	1	1	1	1	1	1	1	1	1	1	1	1	1	1	1	1
AX-147264944		130755562	1	1	1	0	2	1	1	1	1	1	1	1	1	1	1	1	1	1	1	1	1	1	1	1	1	1	1	1	1	1	1	1	1	1	1	1	1	1	1	1	1	1	1	1	1	1	1
AX-147264974		131275028	1	1	1	2	0	1	1	1	1	1	1	1	1	1	1	1	1	1	1	1	1	1	1	1	1	1	1	1	1	2	1	1	1	1	1	1	1	1	1	1	1	1	1	1	1	1	1
AX-147236848		131284674	1	1	1	2	0	1	1	1	1	1	1	1	1	1	1	1	1	1	1	1	1	1	1	1	1	1	1	1	1	2	1	1	NoCall	1	1	1	1	1	1	1	1	1	1	1	1	1	1
AX-147264982		131312116	1	1	1	2	0	1	1	1	1	1	1	1	1	1	1	1	1	1	1	1	1	1	1	1	1	1	1	1	1	2	1	1	1	1	1	1	1	1	1	1	1	1	1	1	1	1	1
AX-147236908		131973034	1	1	1	0	2	1	1	1	1	1	1	1	1	1	1	1	1	1	1	1	1	1	1	1	1	1	1	1	1	2	1	1	1	1	1	1	1	1	1	1	1	1	1	1	1	1	1
AX-147265127		132748121	1	1	1	0	2	1	1	1	1	1	1	1	1	1	1	1	1	1	1	1	1	1	1	1	1	1	1	1	1	2	1	1	1	1	1	1	1	1	1	1	1	1	0	1	1	1	1
AX-147237015		133309090	1	1	1	2	0	1	1	1	1	1	1	1	1	1	1	1	1	1	1	1	1	1	1	1	1	1	1	1	1	2	1	1	1	1	1	1	1	1	1	1	1	1	0	1	1	1	1
AX-147237029		133454442	1	1	1	2	0	1	1	1	1	1	1	1	1	1	1	1	1	1	1	1	1	1	1	1	1	1	1	1	1	2	1	1	1	1	1	1	1	1	1	1	1	1	0	1	1	1	1
AX-147237030		133454691	1	1	1	0	2	1	1	1	1	1	1	1	1	1	1	1	1	1	1	1	1	1	1	1	1	1	1	1	1	2	1	1	1	1	1	1	1	1	1	1	1	1	0	1	1	1	1
AX-147265226		133576218	1	1	1	0	2	1	1	1	1	1	1	1	1	1	1	1	1	1	1	1	1	1	1	1	1	1	1	1	1	2	1	1	1	1	1	1	1	1	1	1	1	1	0	1	1	1	1
AX-147237065		133737967	1	1	1	0	2	1	1	1	1	1	1	1	1	1	1	1	1	1	1	1	1	1	1	1	1	1	1	1	1	2	1	1	1	1	1	1	1	1	1	1	1	1	1	1	1	1	1
AX-147265261		133772535	1	1	1	0	2	1	1	1	1	1	1	1	1	1	1	1	1	1	1	1	1	1	1	1	1	1	1	1	1	1	1	1	1	1	1	1	1	1	1	1	1	1	1	1	1	1	1
AX-147265285		133934268	1	1	1	0	2	1	1	1	1	1	1	1	1	1	1	1	1	1	1	1	1	1	1	1	1	1	1	1	1	2	1	1	1	1	1	1	1	1	1	1	1	1	NoCall	1	1	1	1
AX-147265303		134046167	1	1	1	0	2	1	1	1	1	1	1	1	1	1	1	1	1	1	1	1	1	1	1	1	1	1	1	1	1	2	1	1	1	1	1	1	1	1	1	1	1	1	0	1	1	1	1
AX-147265304		134058286	1	1	1	2	0	1	1	1	1	1	1	1	1	1	1	1	1	1	1	1	1	1	1	1	1	1	1	1	1	1	1	1	1	1	1	1	1	1	1	1	1	1	0	1	1	1	1
AX-176791932		134339689	1	1	1	0	2	1	1	1	1	1	1	1	1	1	1	1	1	1	1	1	1	1	1	1	1	1	1	1	1	2	1	1	1	1	1	1	1	1	1	1	1	1	0	1	1	1	1
AX-176791472		134342764	1	1	1	2	0	1	1	1	1	1	1	1	1	1	1	1	1	1	1	1	1	1	1	1	1	1	1	1	1	0	1	1	1	1	1	1	1	1	1	1	1	1	0	1	1	1	1
AX-147265358		134354378	1	1	1	2	0	1	1	1	1	1	1	1	1	1	1	1	1	1	1	1	1	1	1	1	1	1	1	1	1	0	1	1	1	1	1	1	1	1	1	1	1	1	0	1	1	1	1
AX-147237155		134368438	1	1	1	2	0	1	1	1	1	1	1	1	1	1	1	1	1	1	1	1	1	1	1	1	1	1	1	1	1	0	1	1	1	1	1	1	1	1	1	1	1	1	0	1	1	1	1
AX-147265410		134742885	1	1	1	0	2	1	1	1	1	1	1	1	1	1	1	1	1	1	1	1	1	1	1	1	1	1	1	1	1	2	1	1	1	1	1	1	1	1	1	1	1	1	0	1	1	1	1
AX-147237224		134787371	1	1	1	2	0	1	1	1	1	1	1	1	1	1	1	1	1	1	1	1	1	1	1	1	1	1	1	1	1	NoCall	1	1	1	1	1	1	1	1	1	1	1	1	0	1	1	1	1
AX-147237253		135008733	1	1	1	0	2	1	1	1	1	1	1	1	1	1	1	1	1	1	1	1	1	1	1	1	1	1	1	1	1	2	1	1	1	1	1	1	1	1	1	1	1	1	0	1	1	1	1
AX-147265524		135654890	1	1	1	2	0	1	1	1	1	1	1	1	1	1	1	1	1	1	1	1	1	1	1	1	1	1	1	1	1	0	1	1	1	1	1	1	1	1	1	1	1	1	0	1	1	1	1
AX-147265529		135685972	1	1	1	0	2	1	1	1	1	1	1	1	1	1	1	1	1	1	1	1	1	1	1	1	1	1	1	1	1	2	1	1	1	1	1	1	1	1	1	1	1	1	0	1	1	1	1
[truncated: 870 more columns]
